# Supplementary material
Source: PubMed Central journal article supplement (PMC2665024)

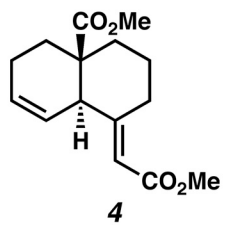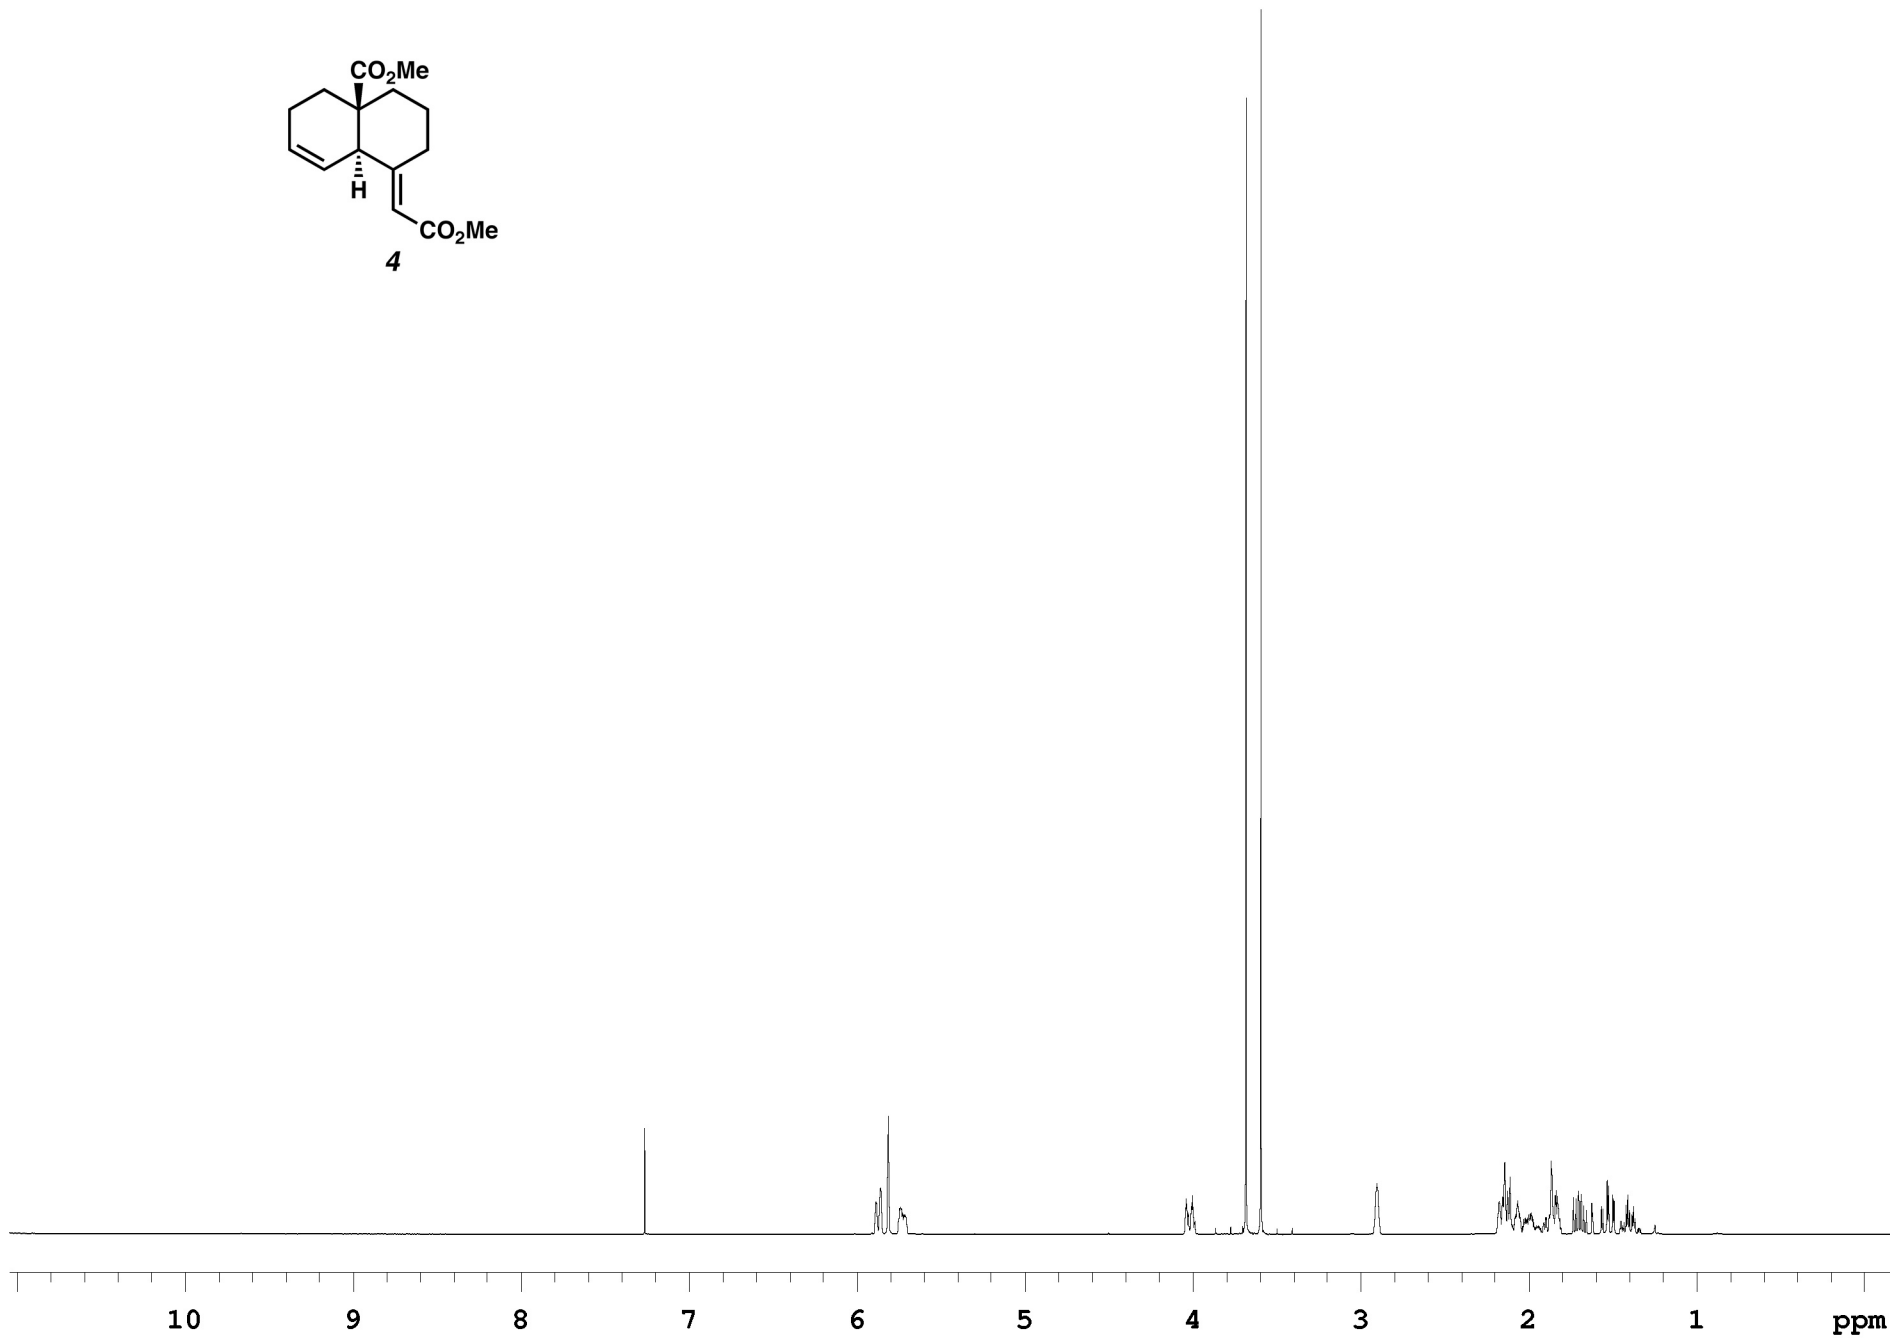

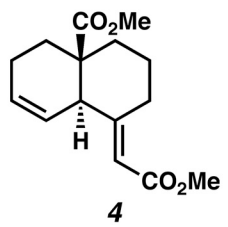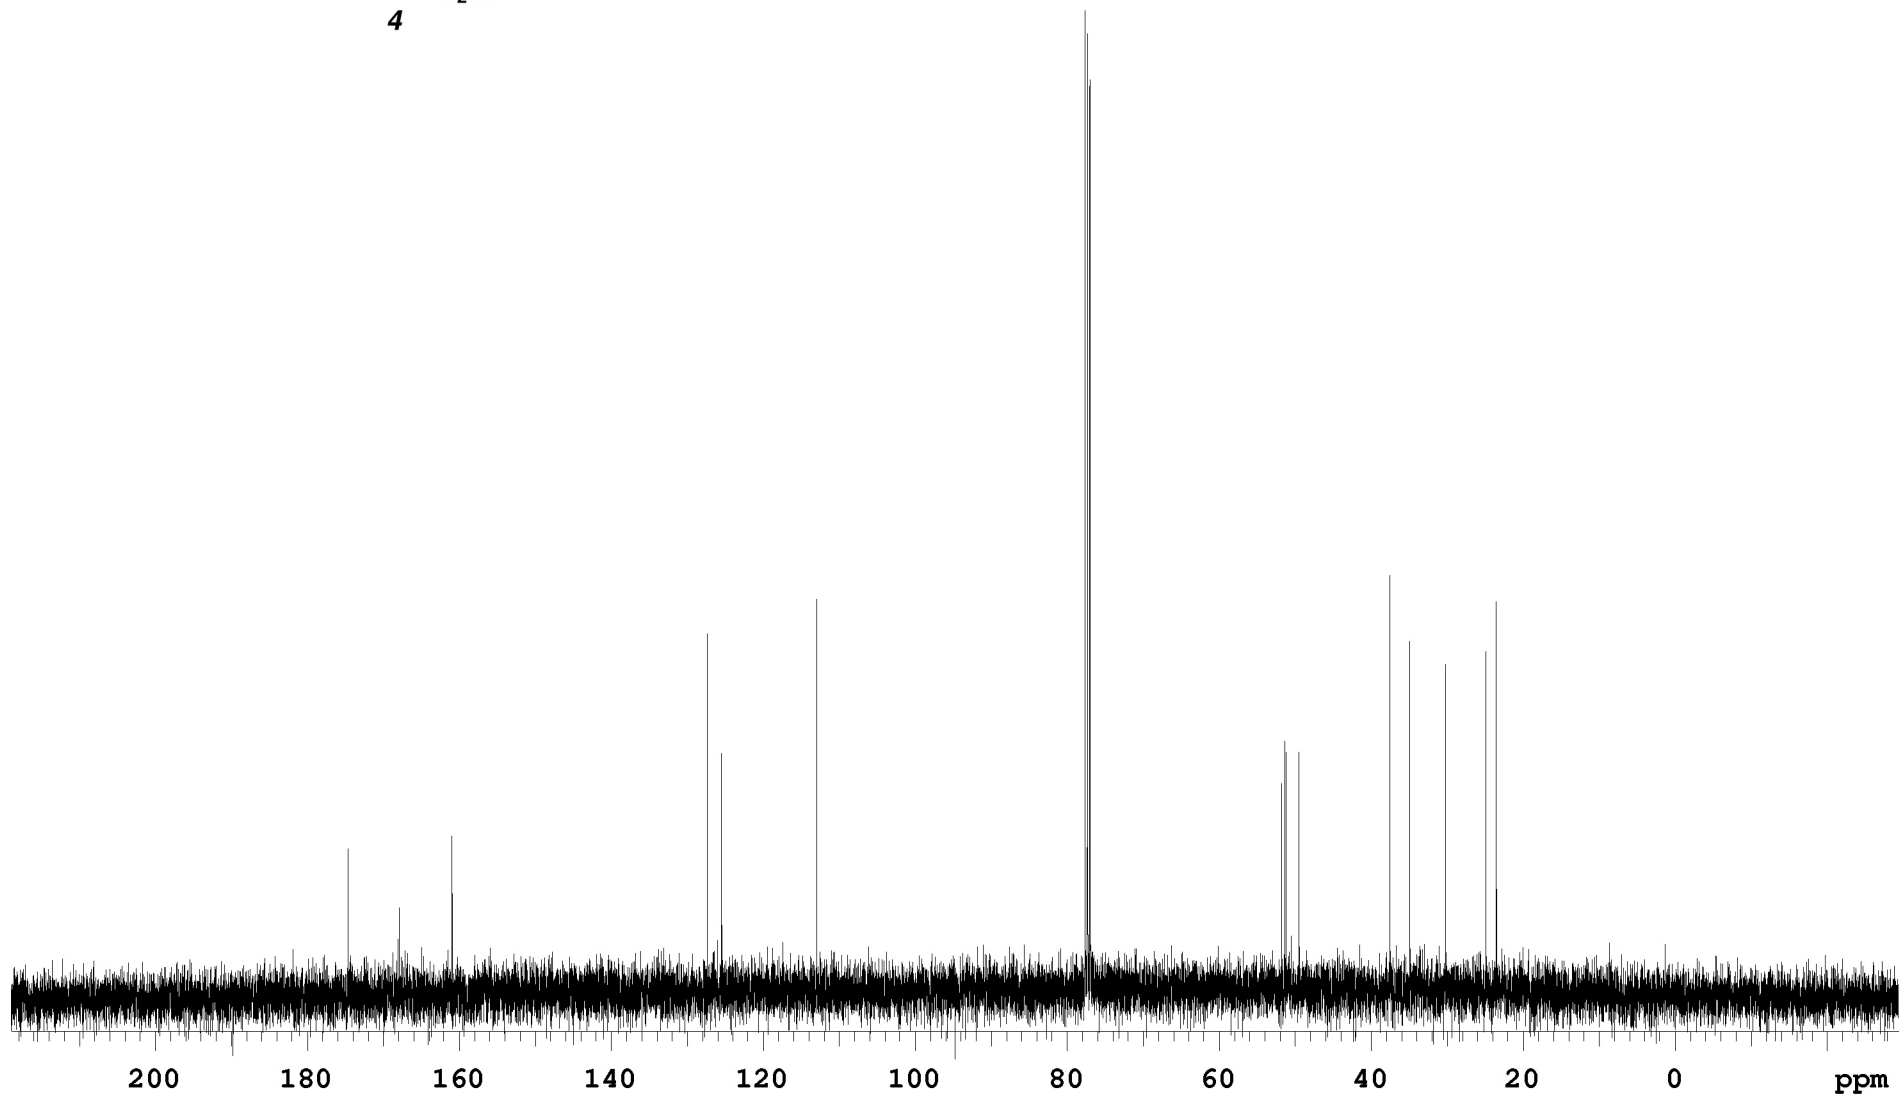

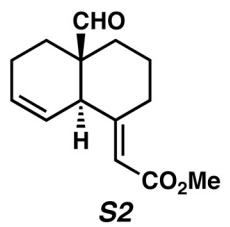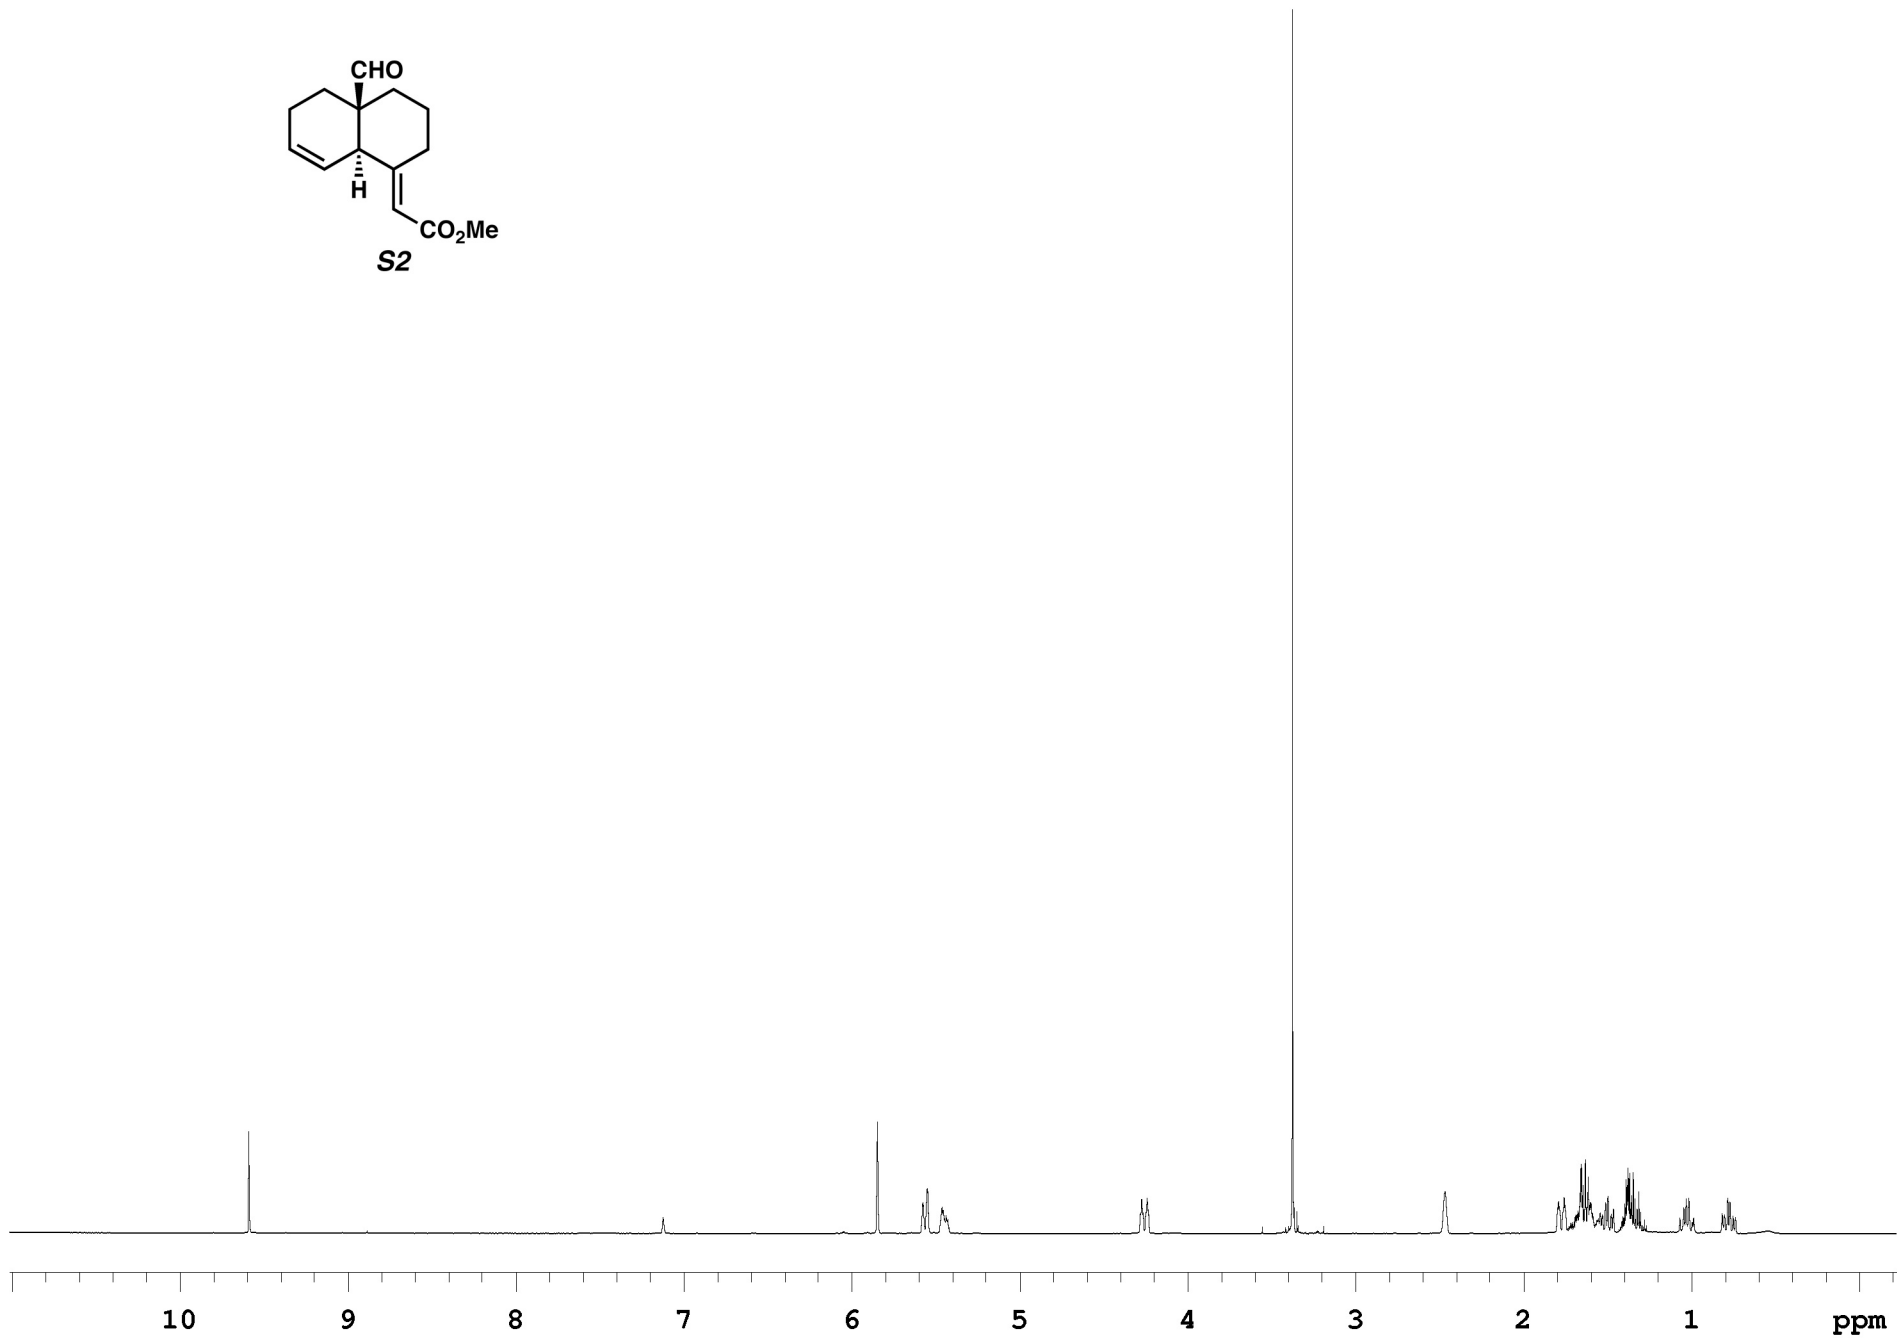

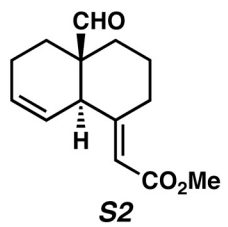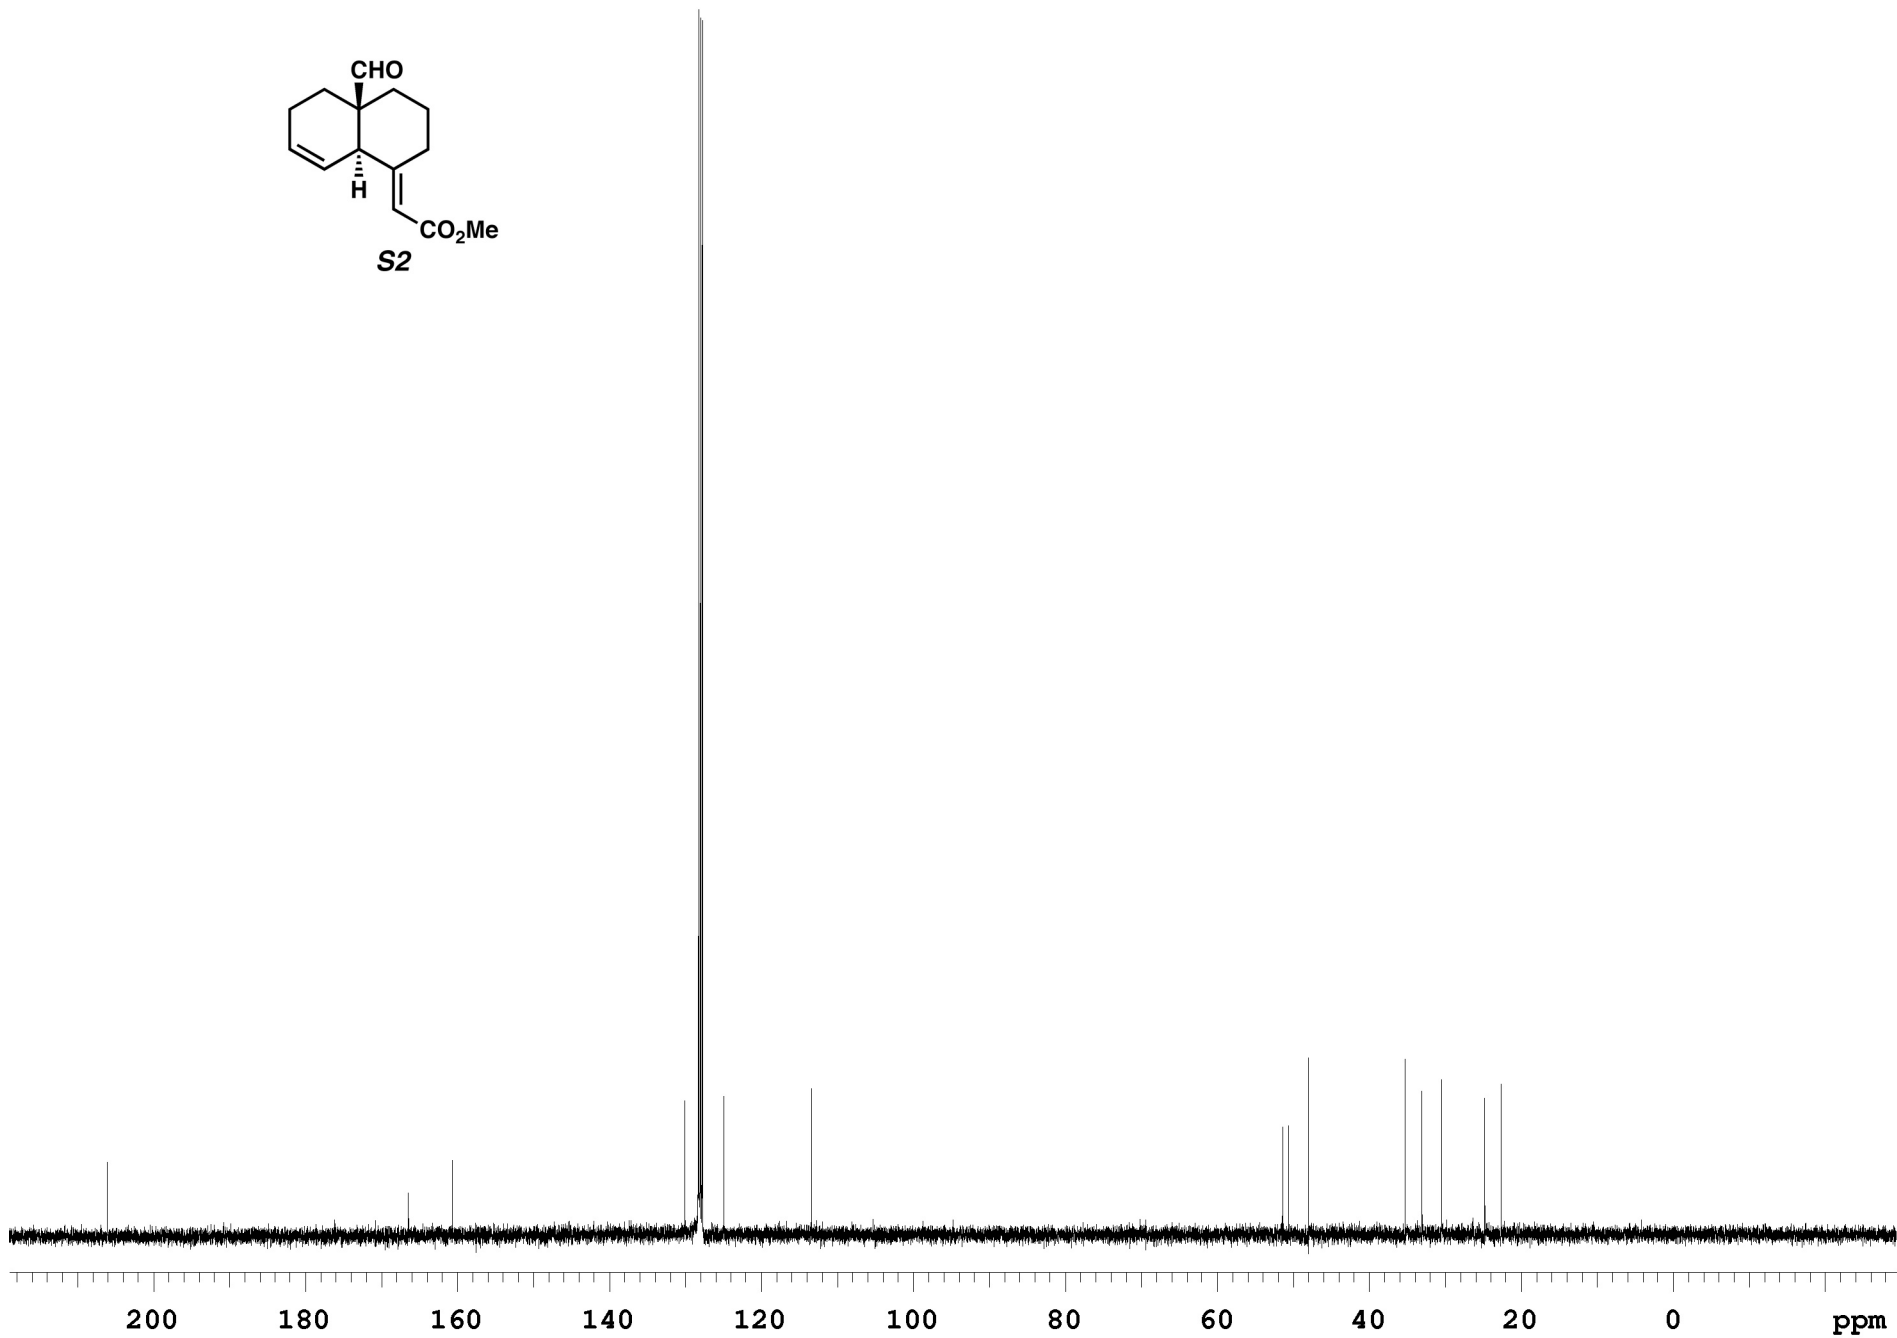

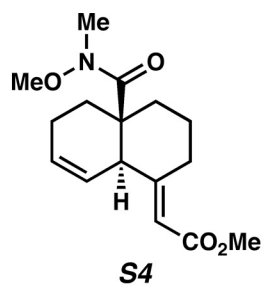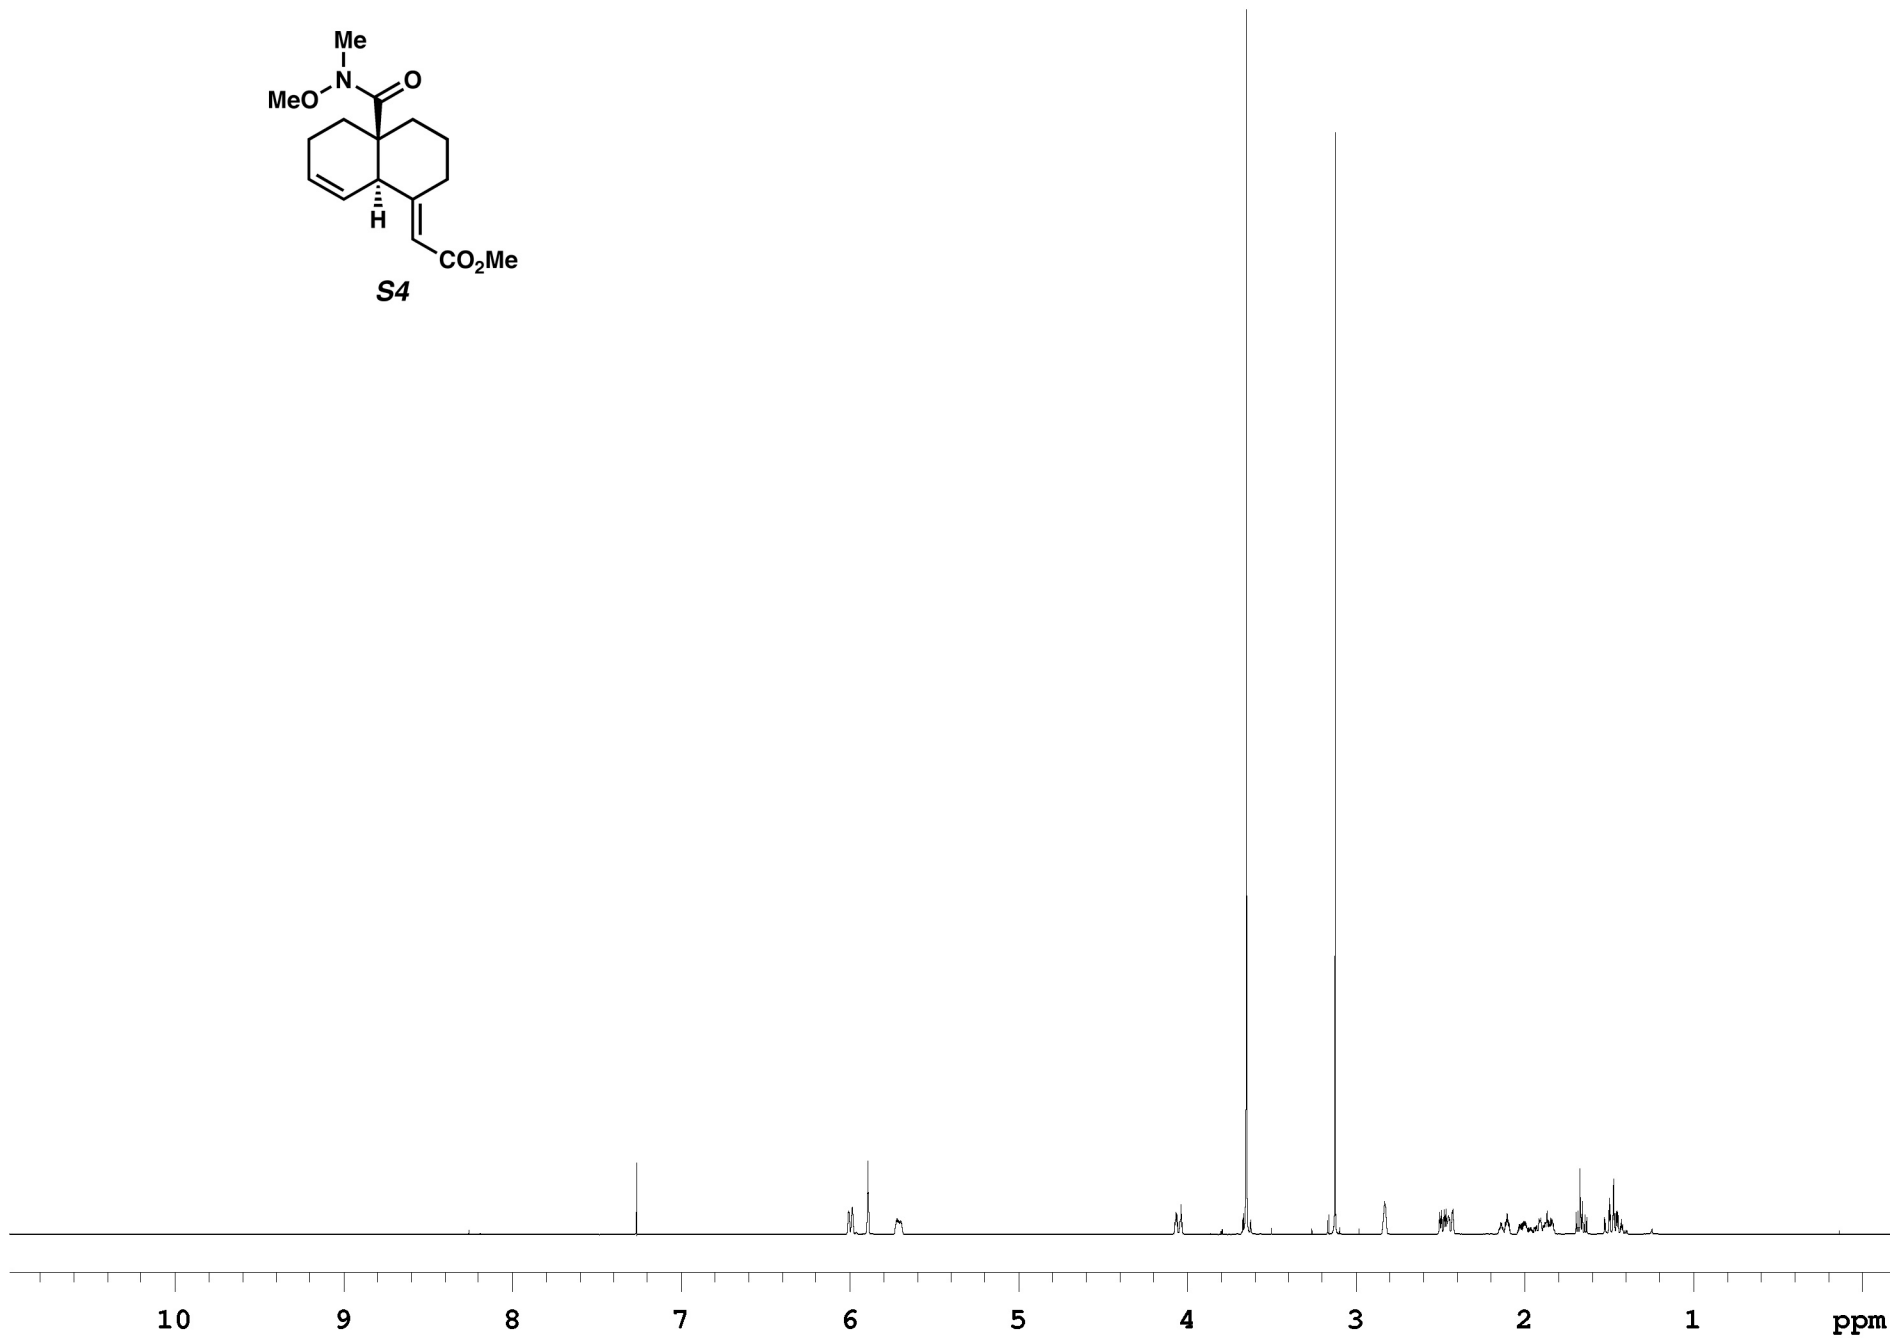

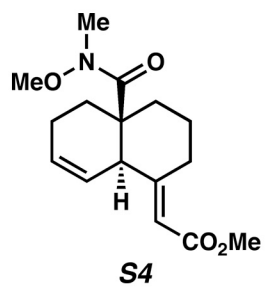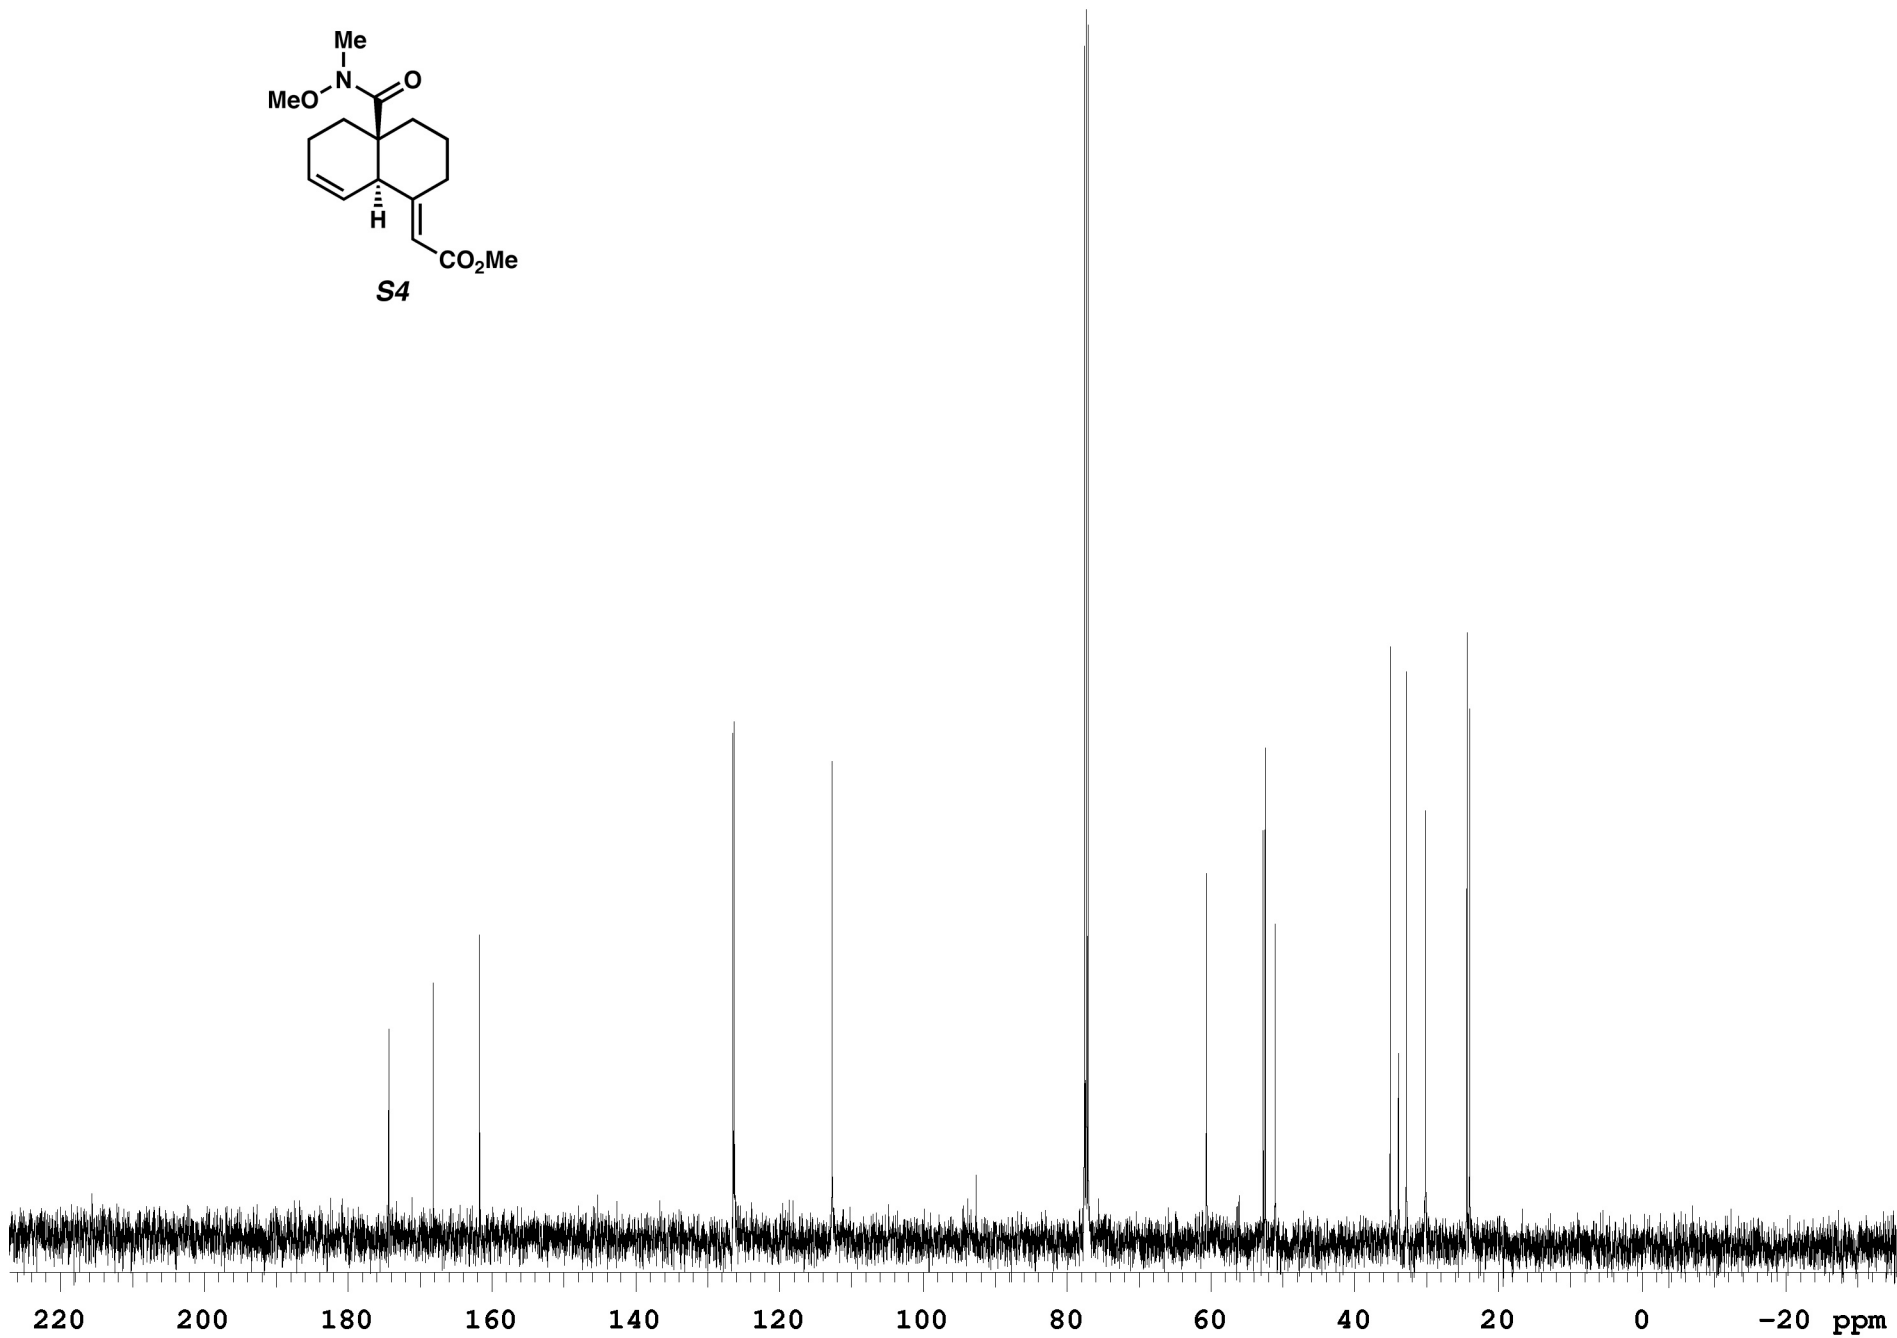

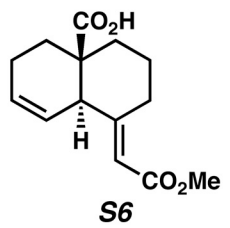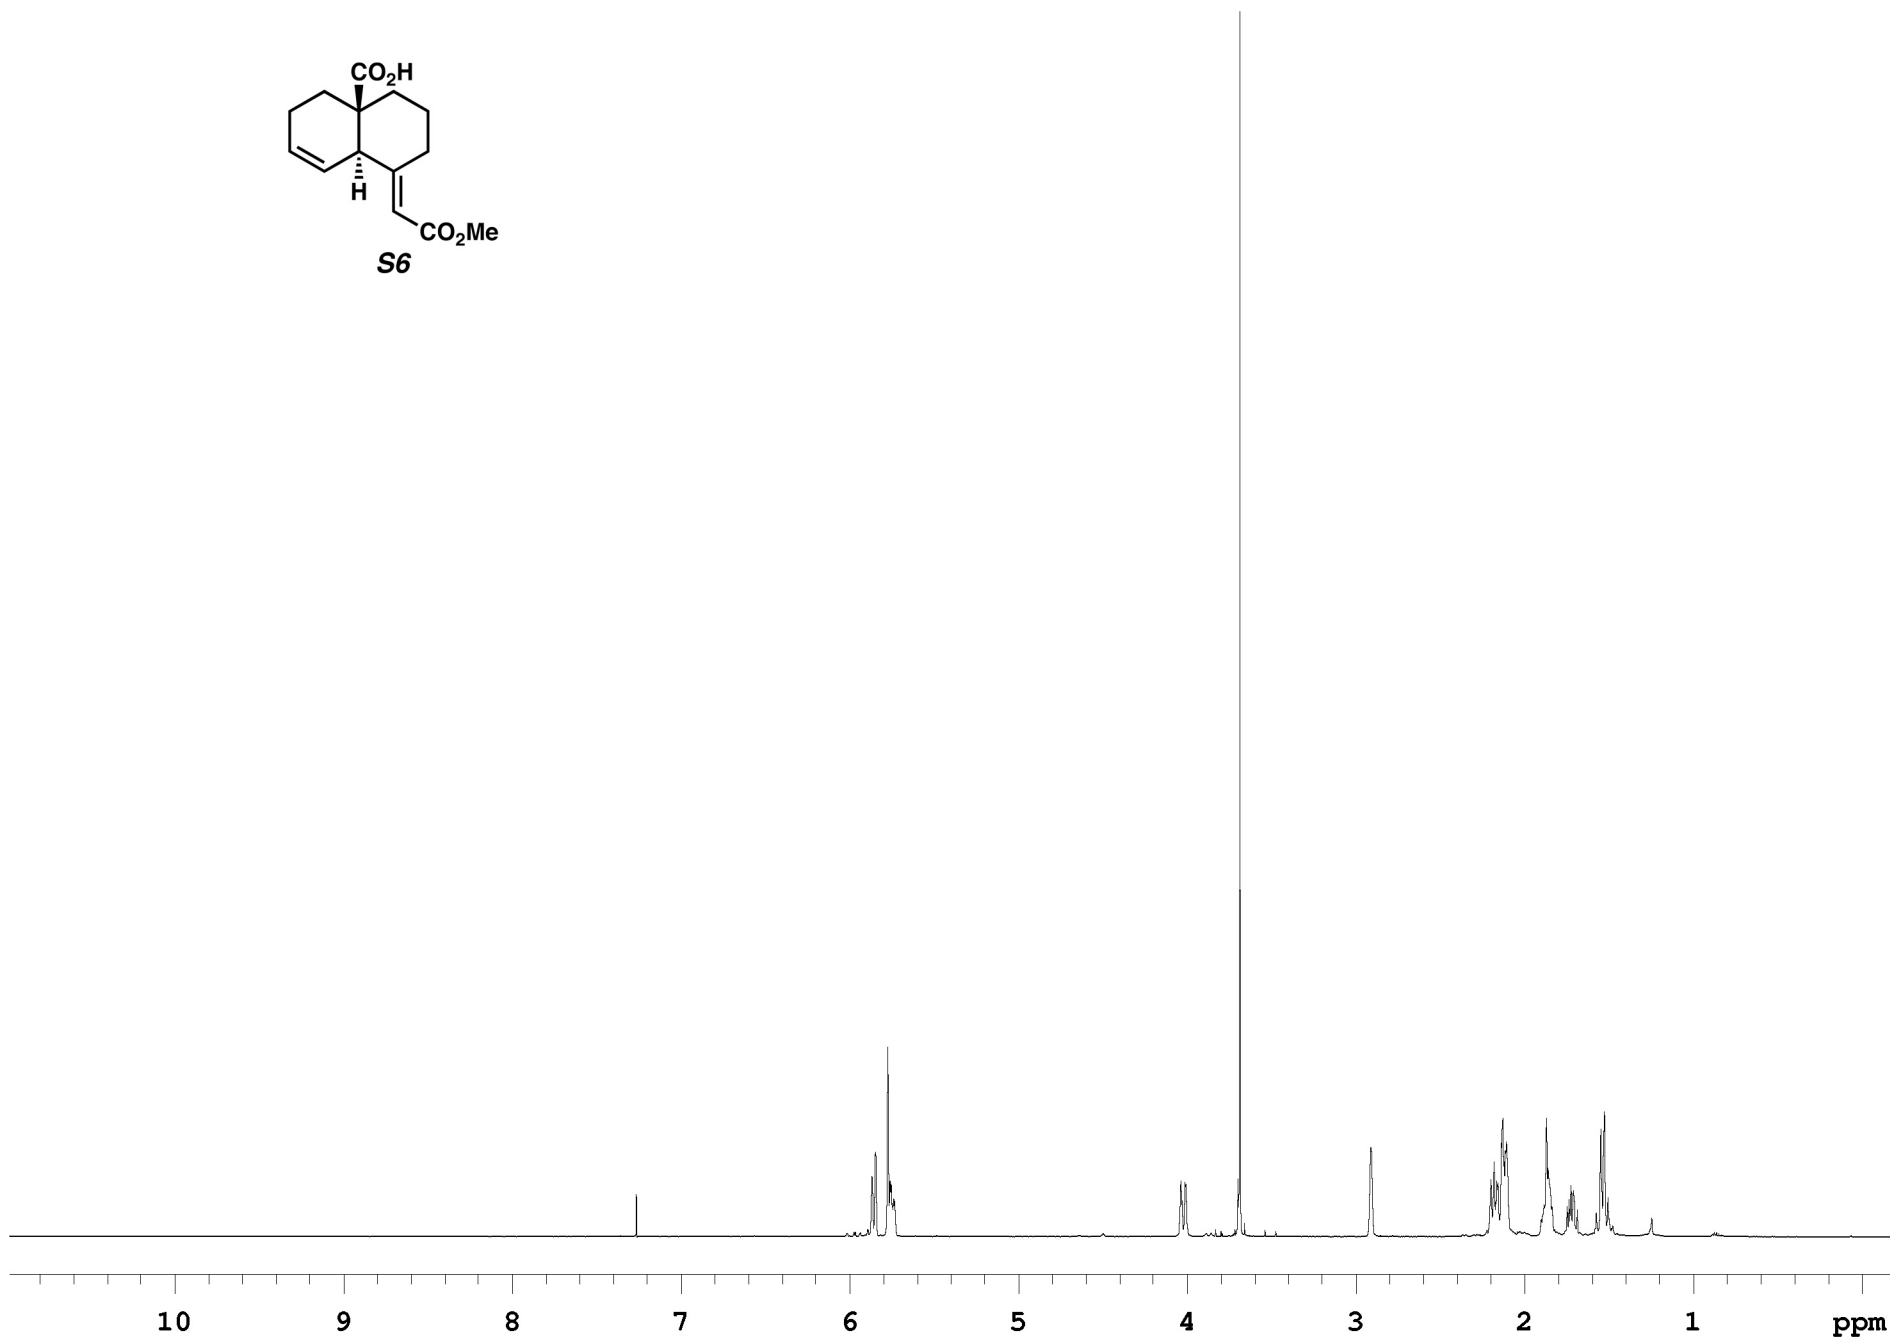

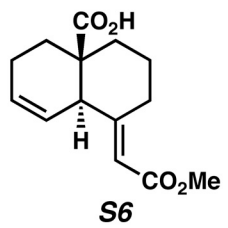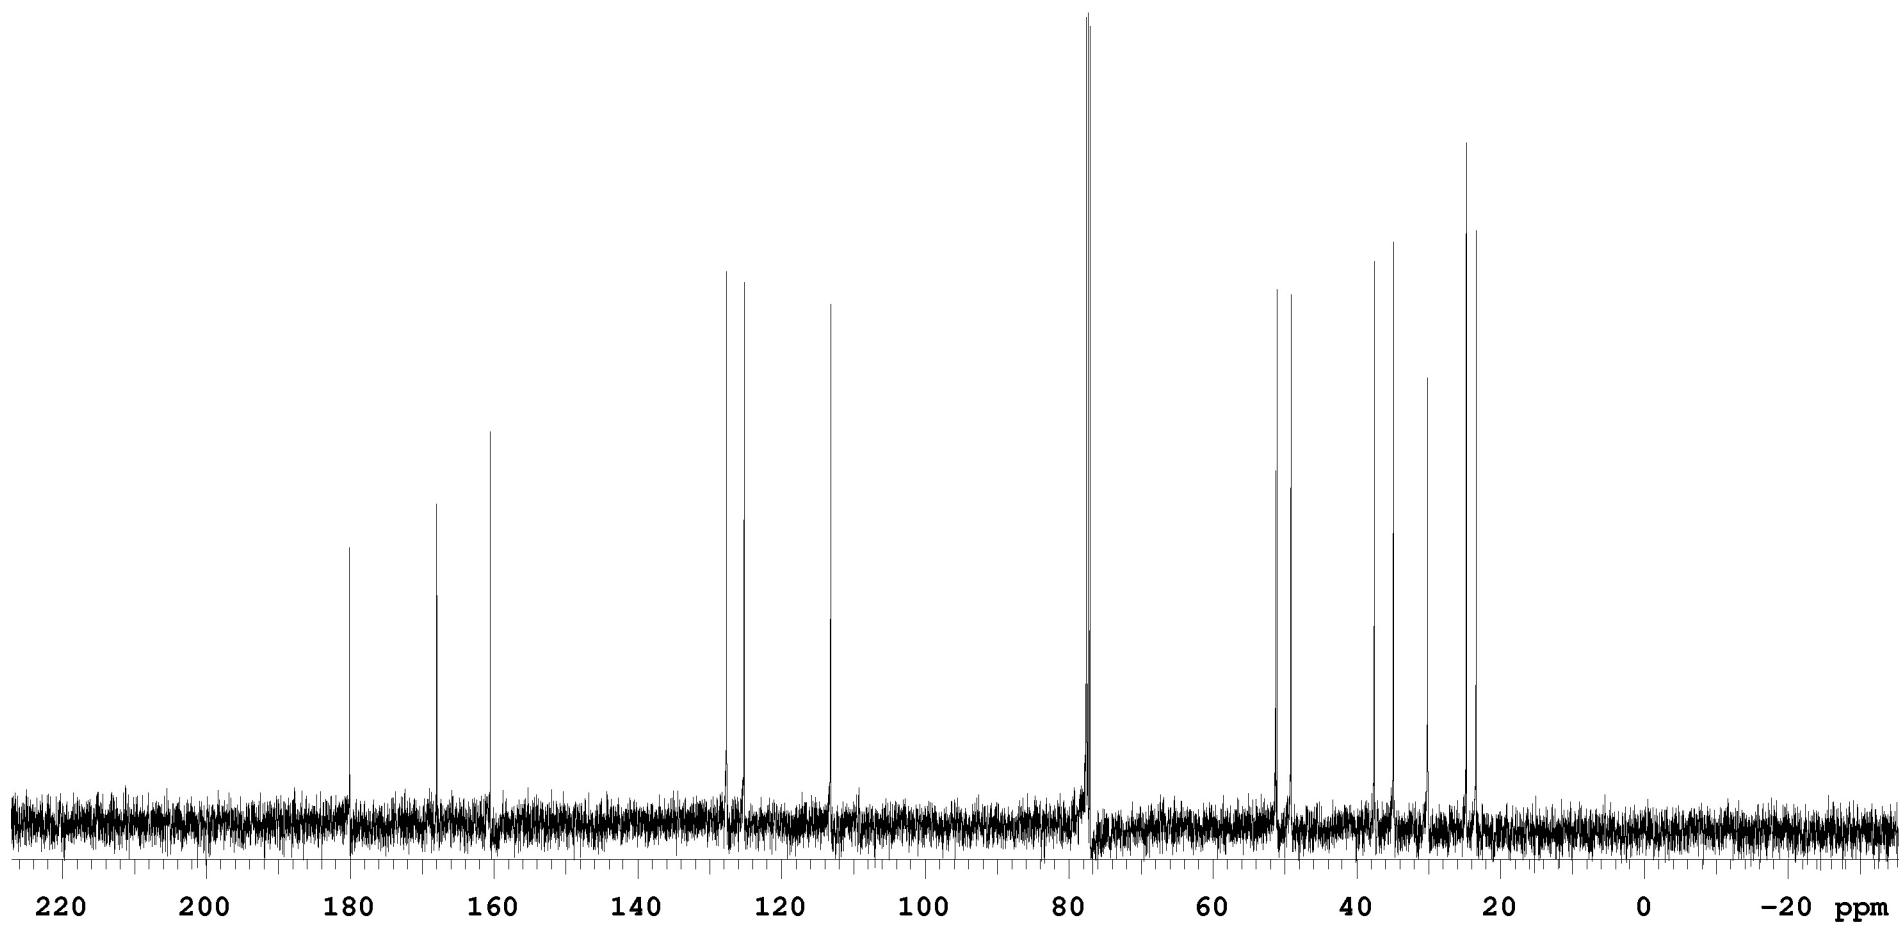



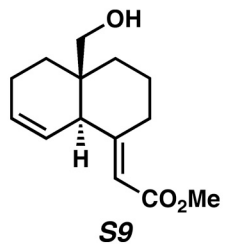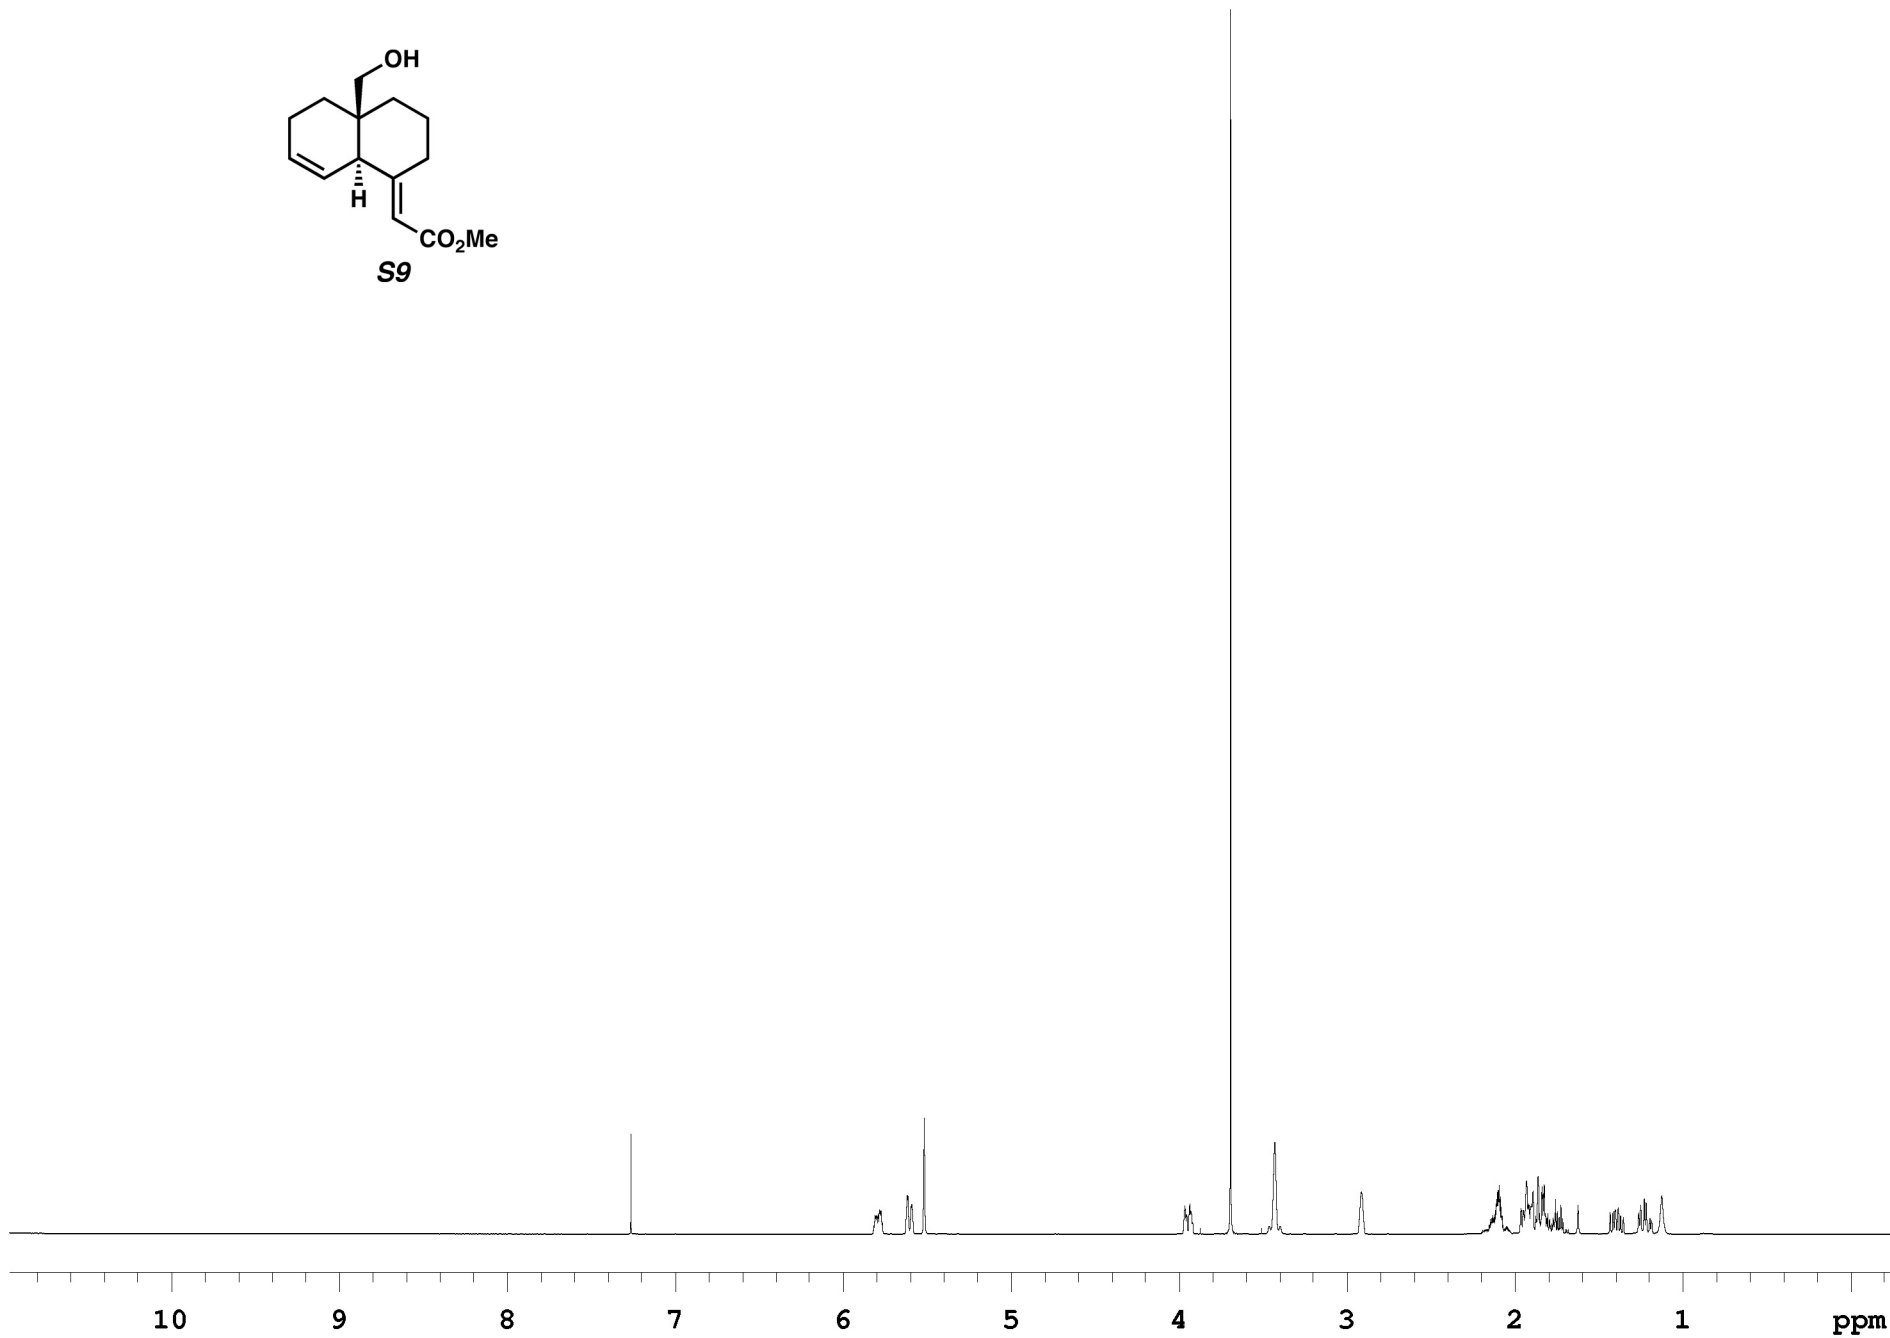

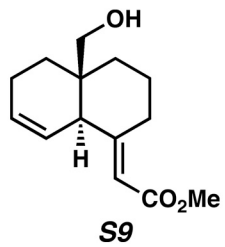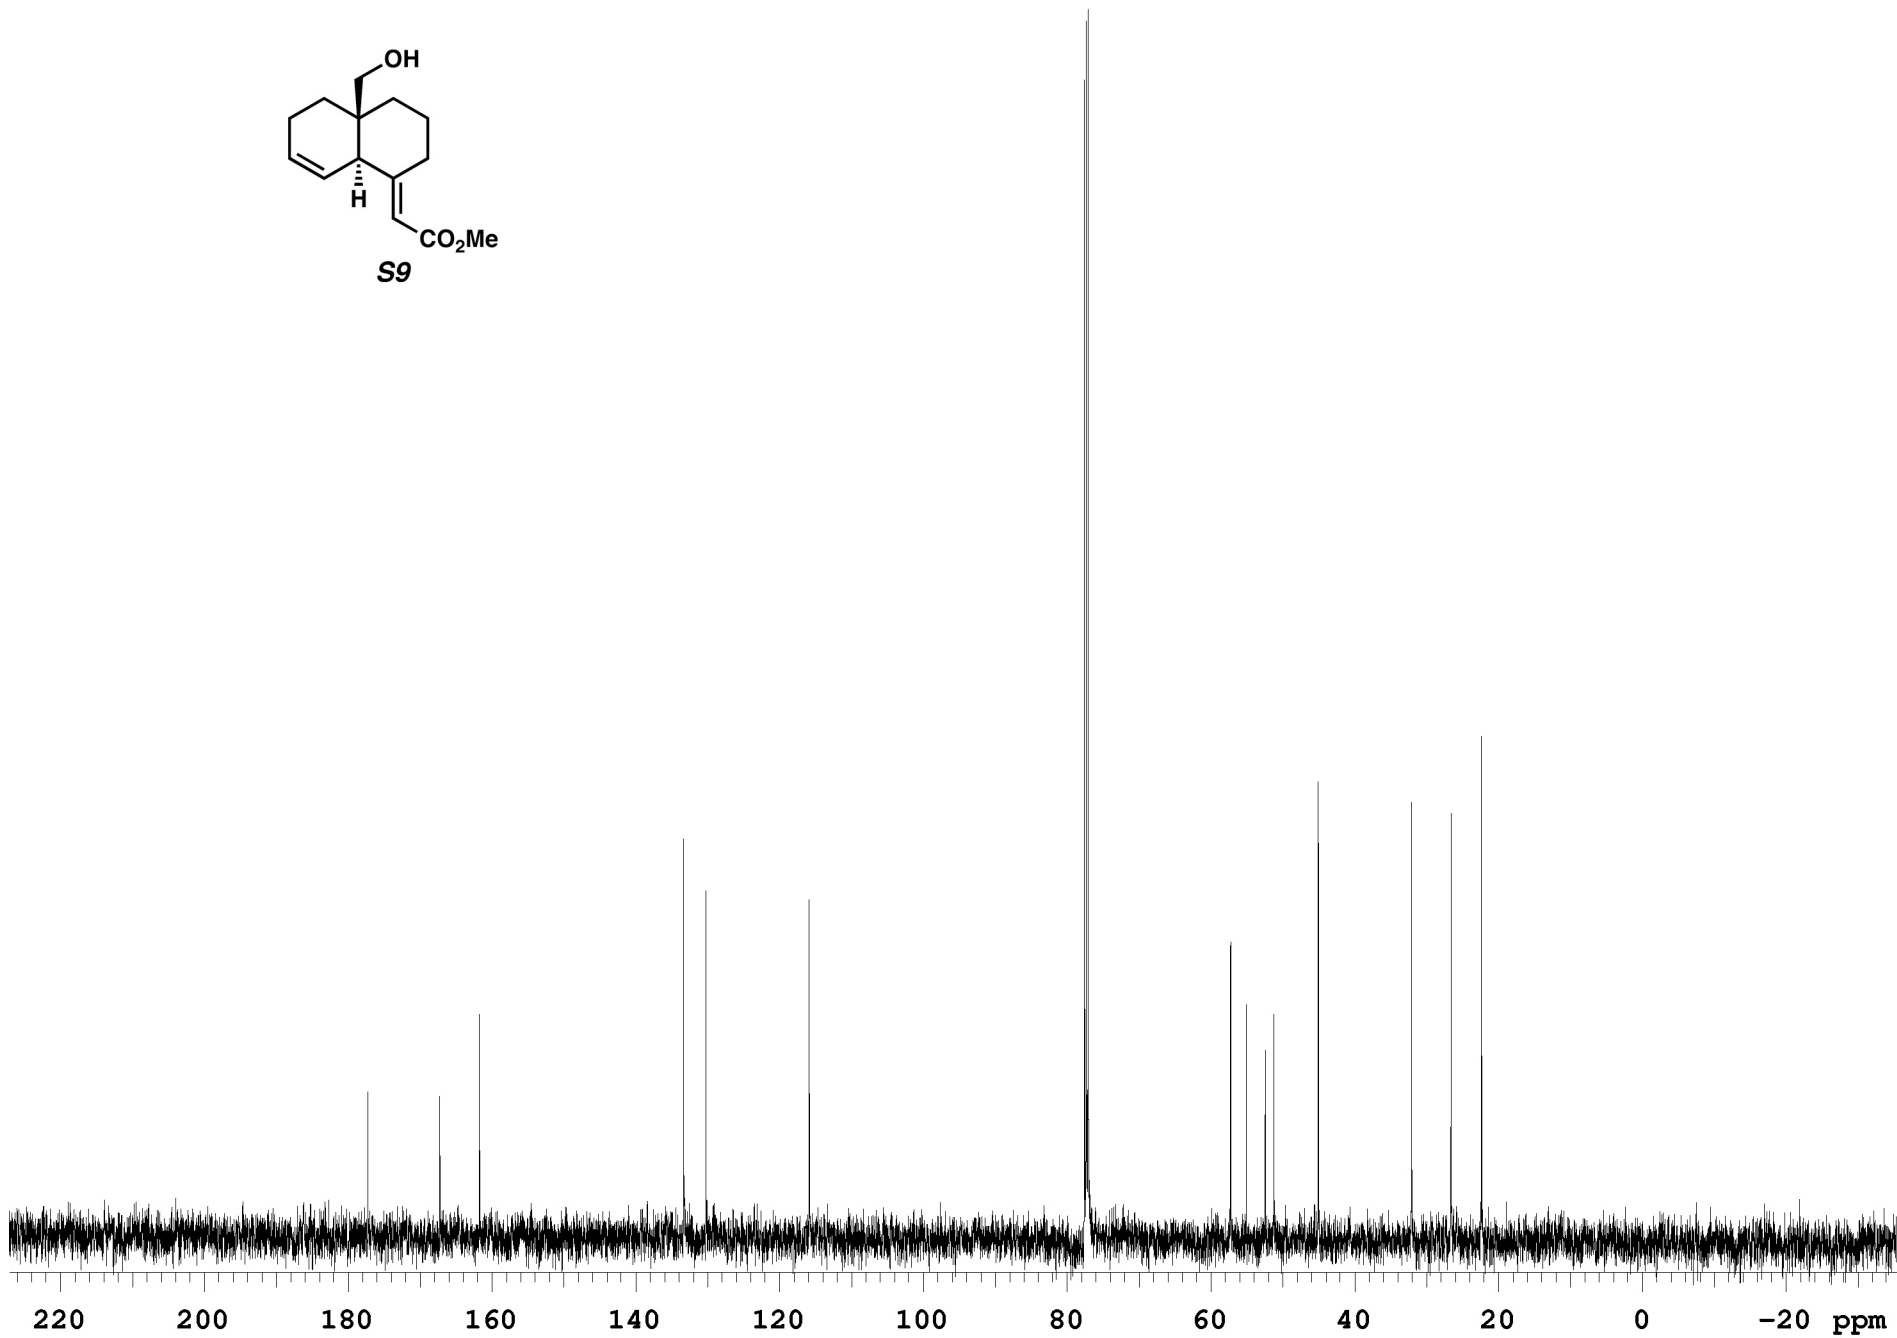

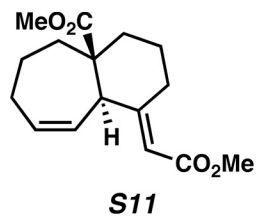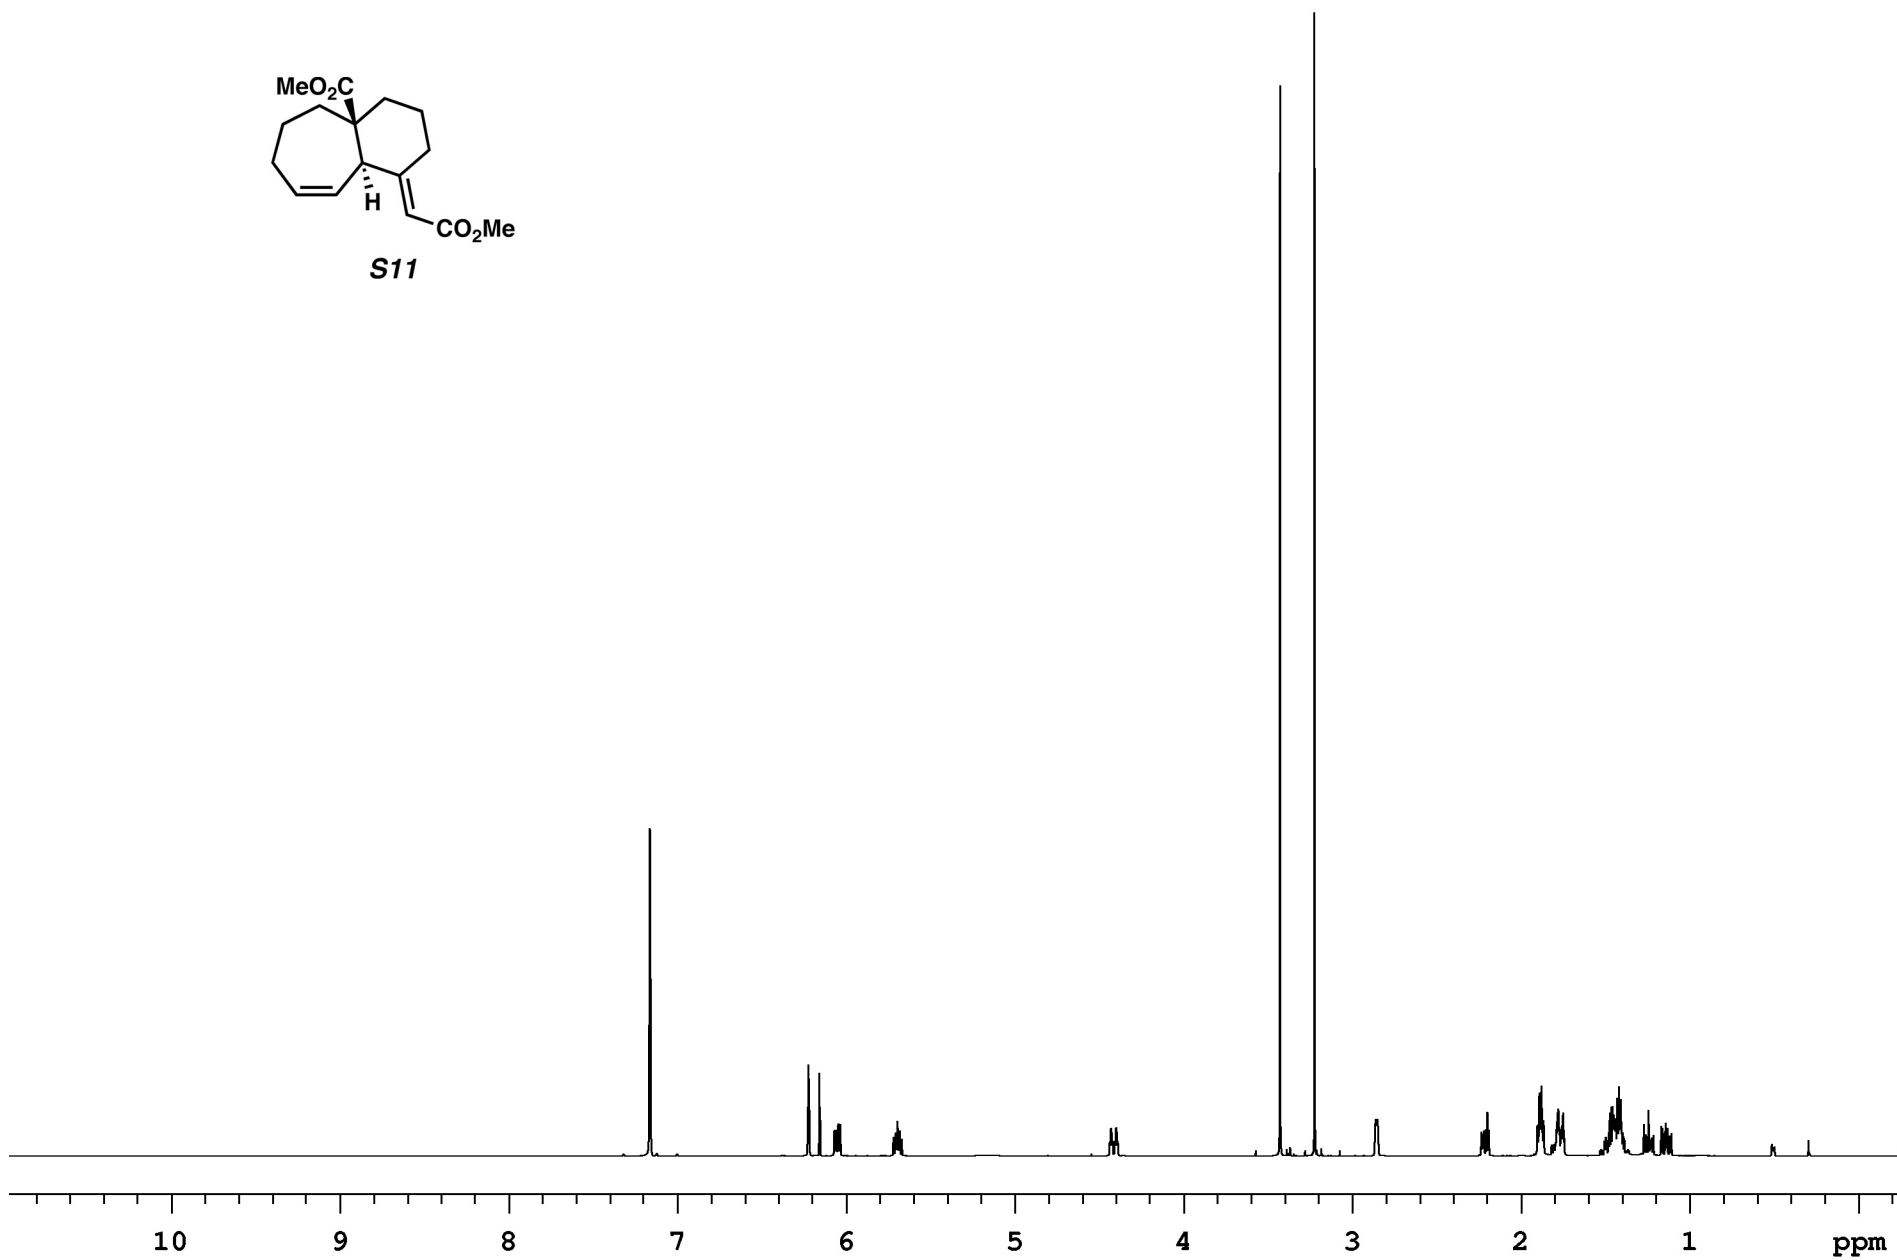

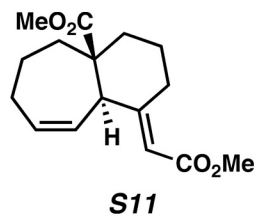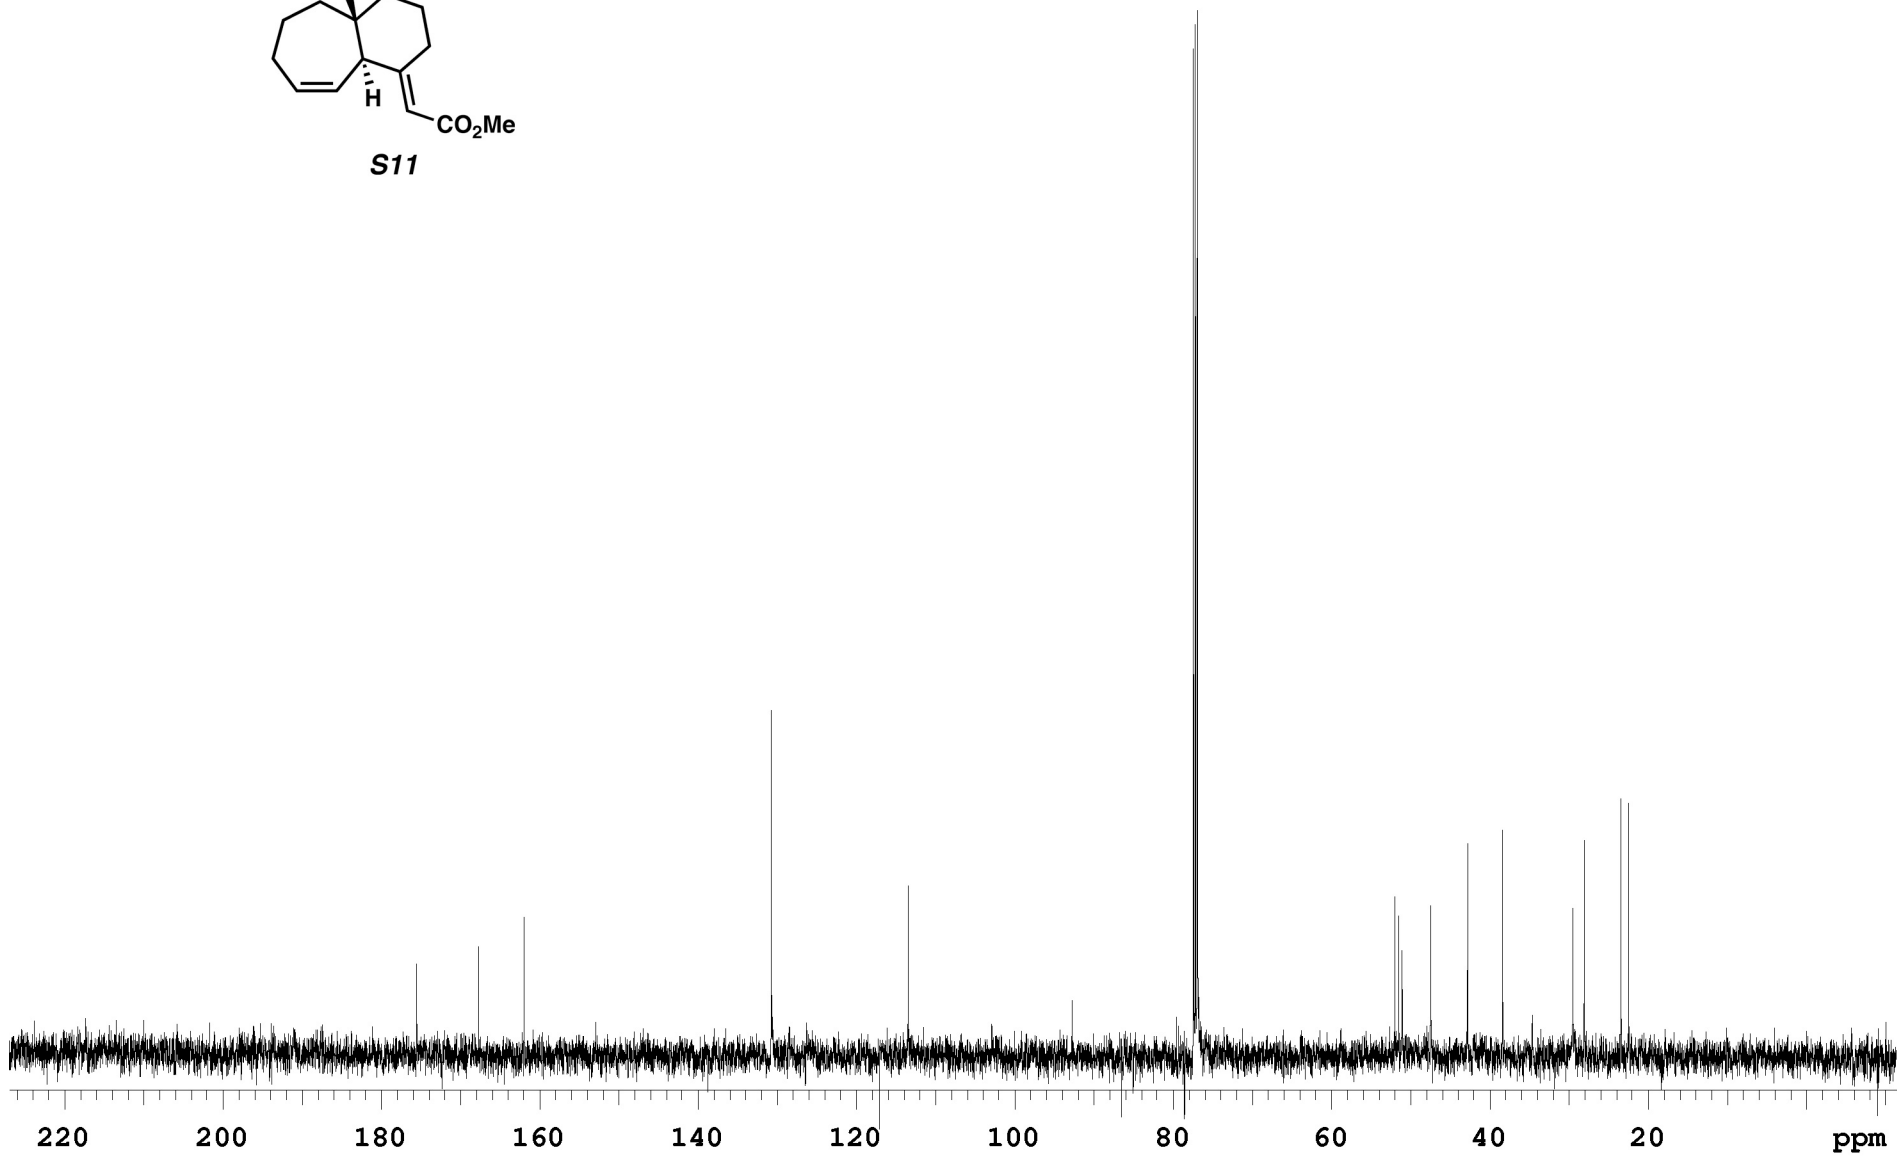

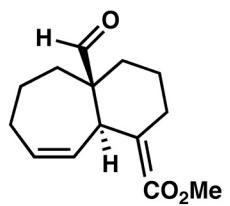

**S13**

500 MHz; CHCl<sub>3</sub>

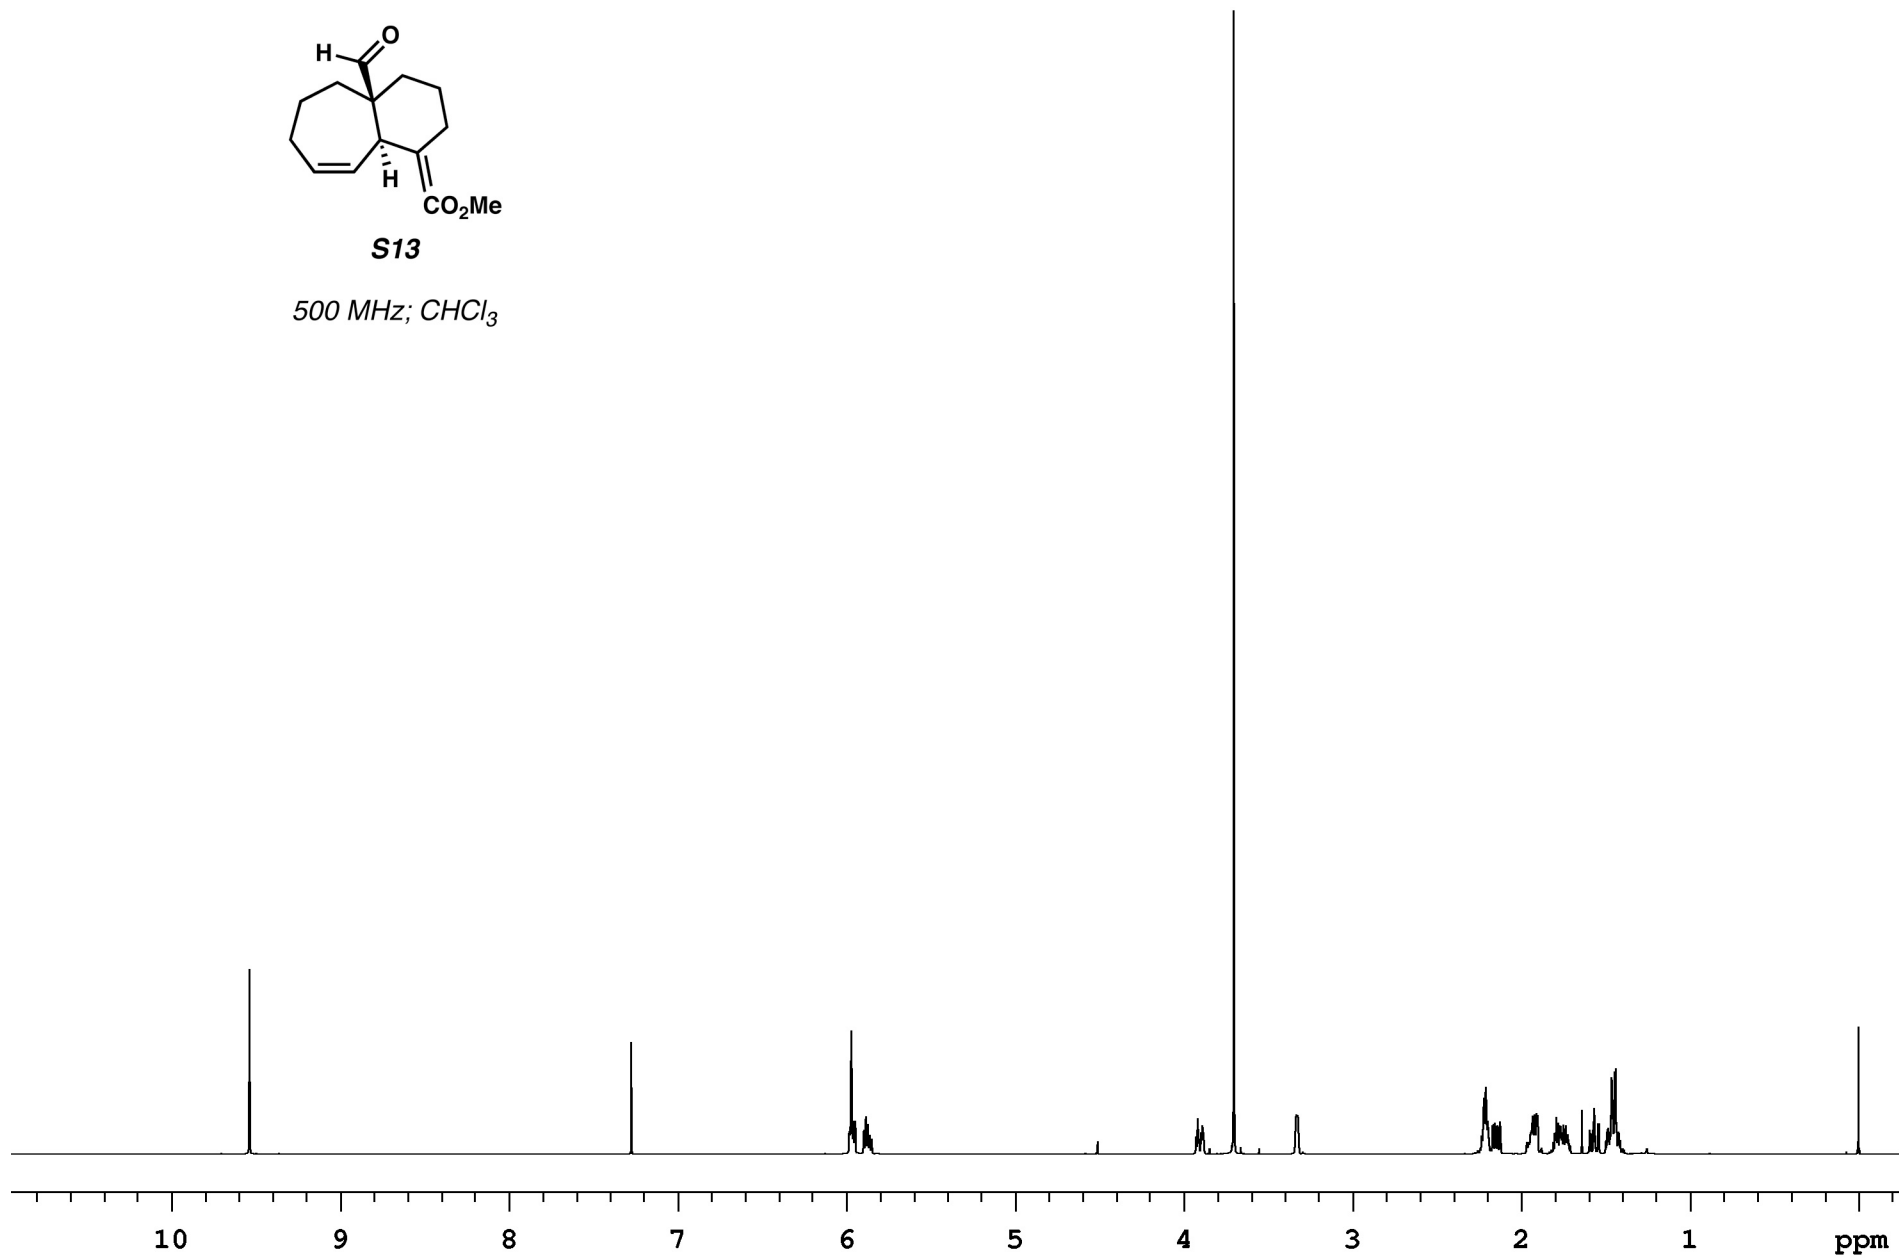

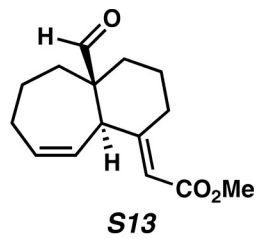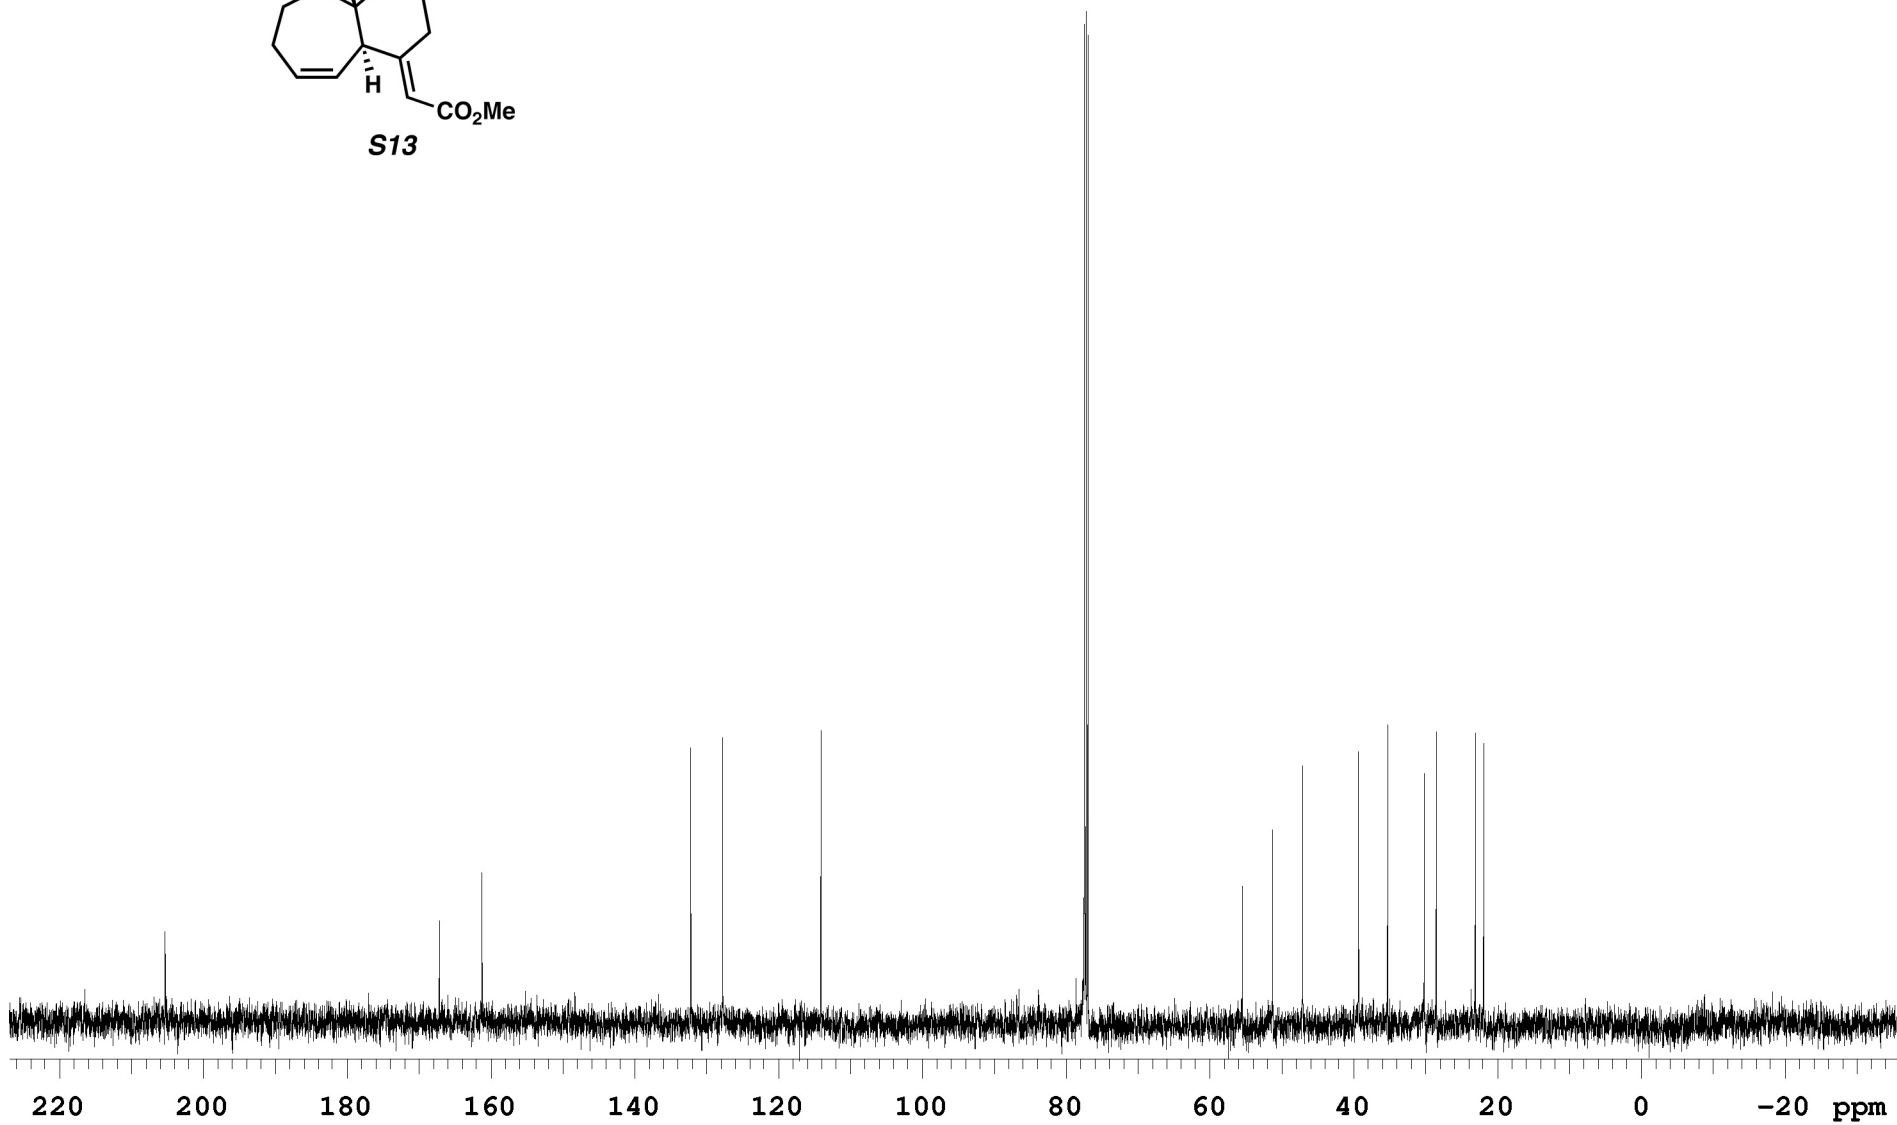

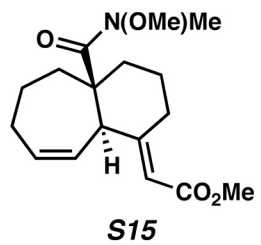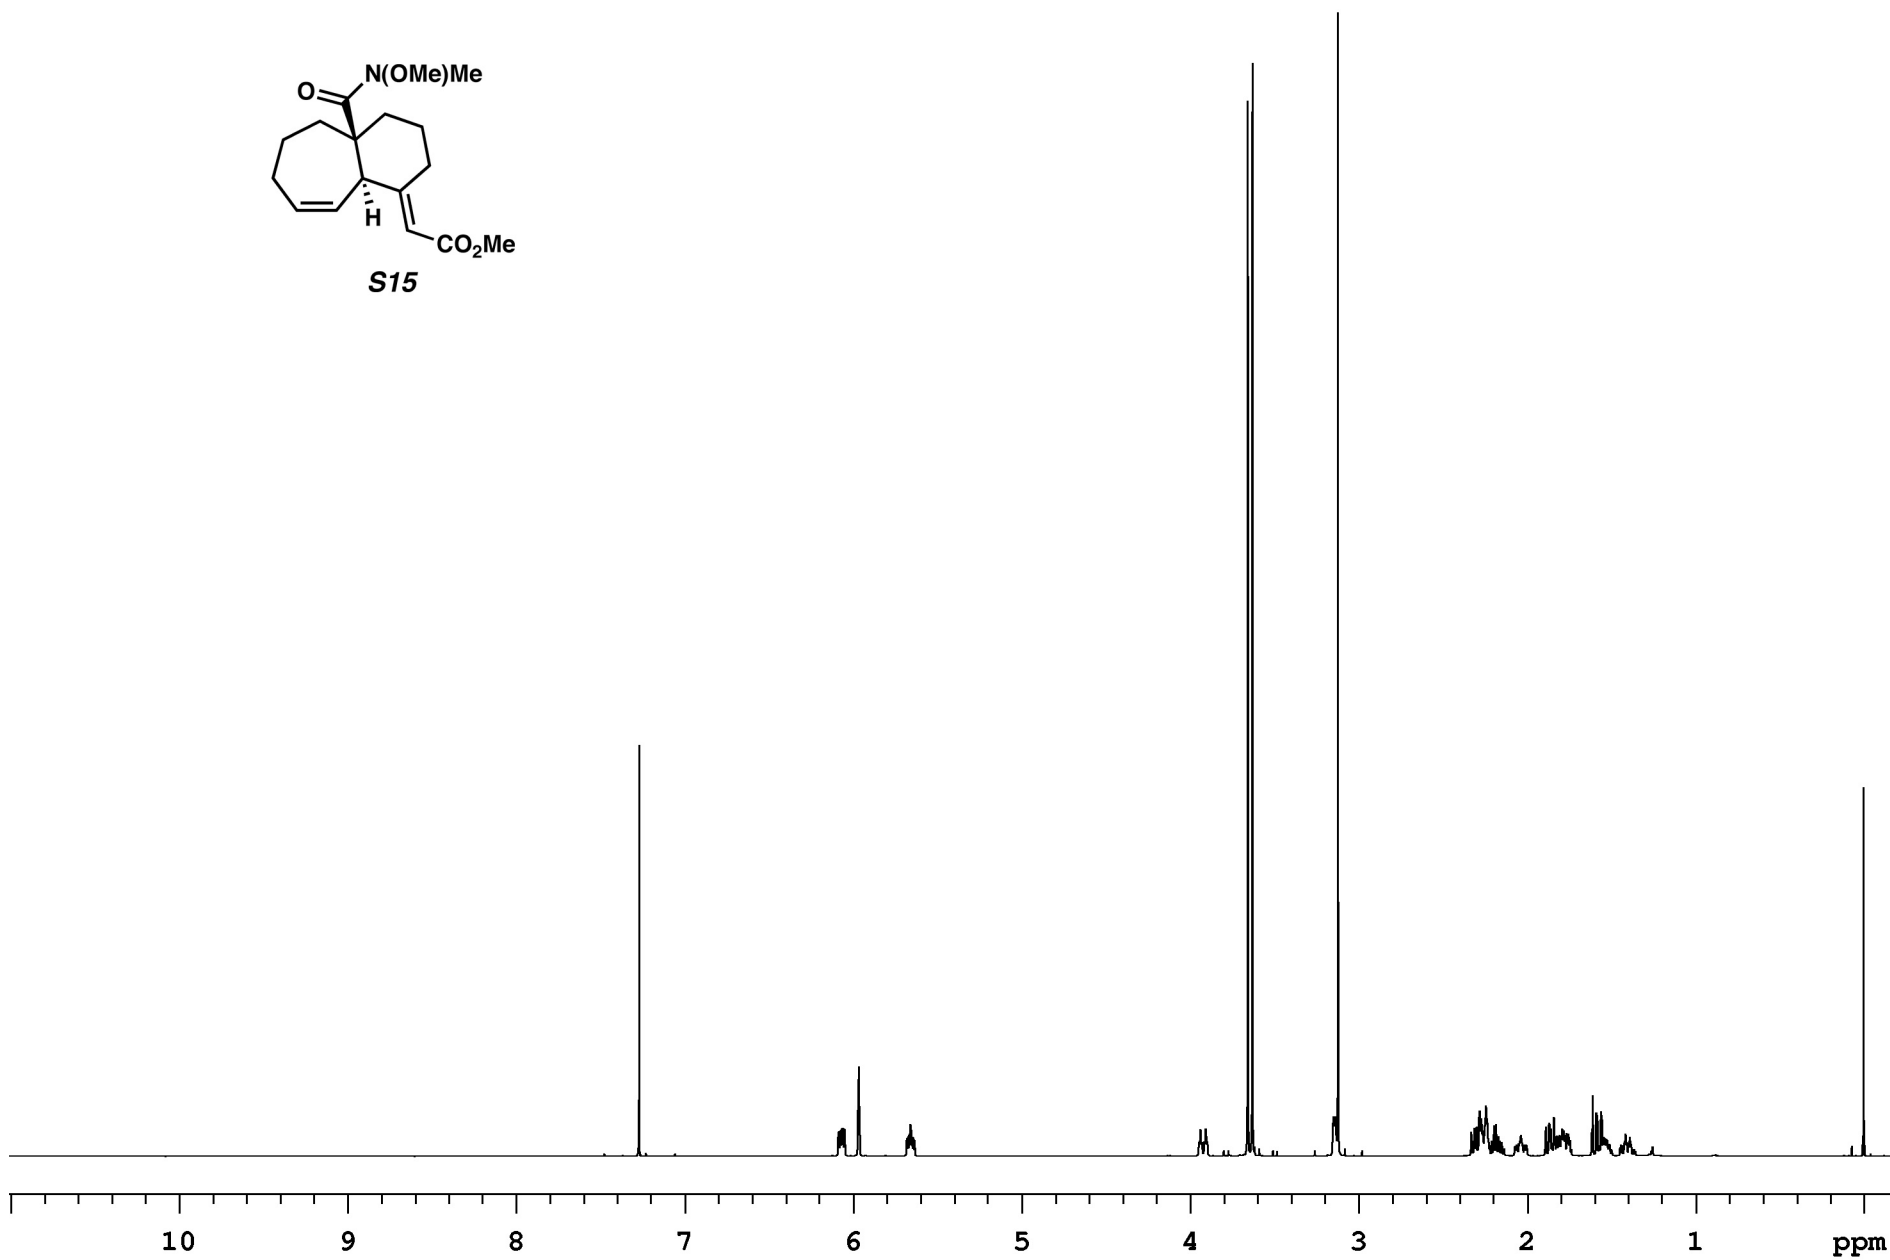

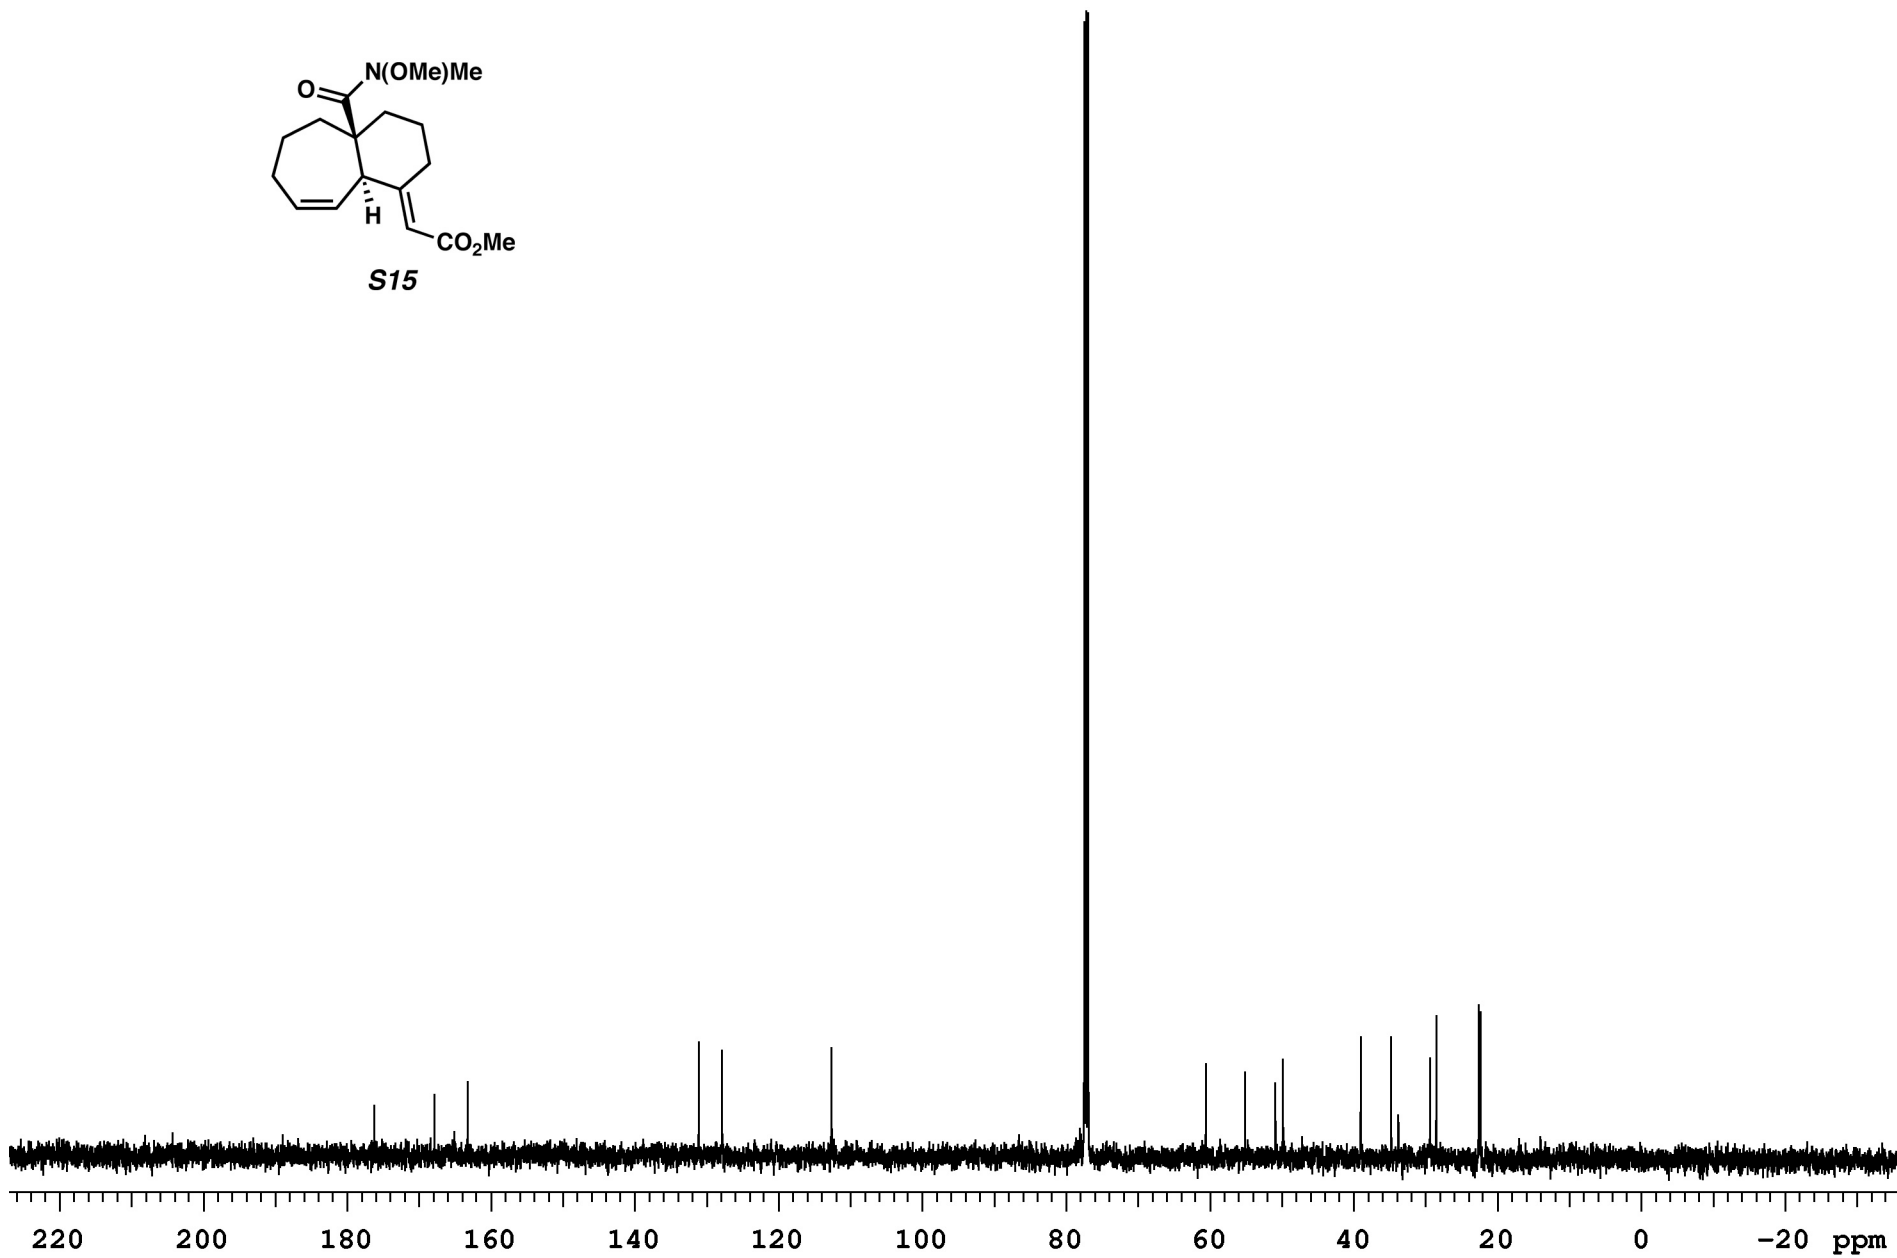



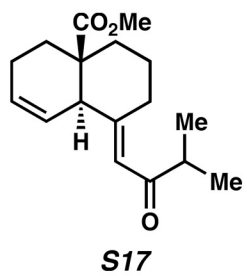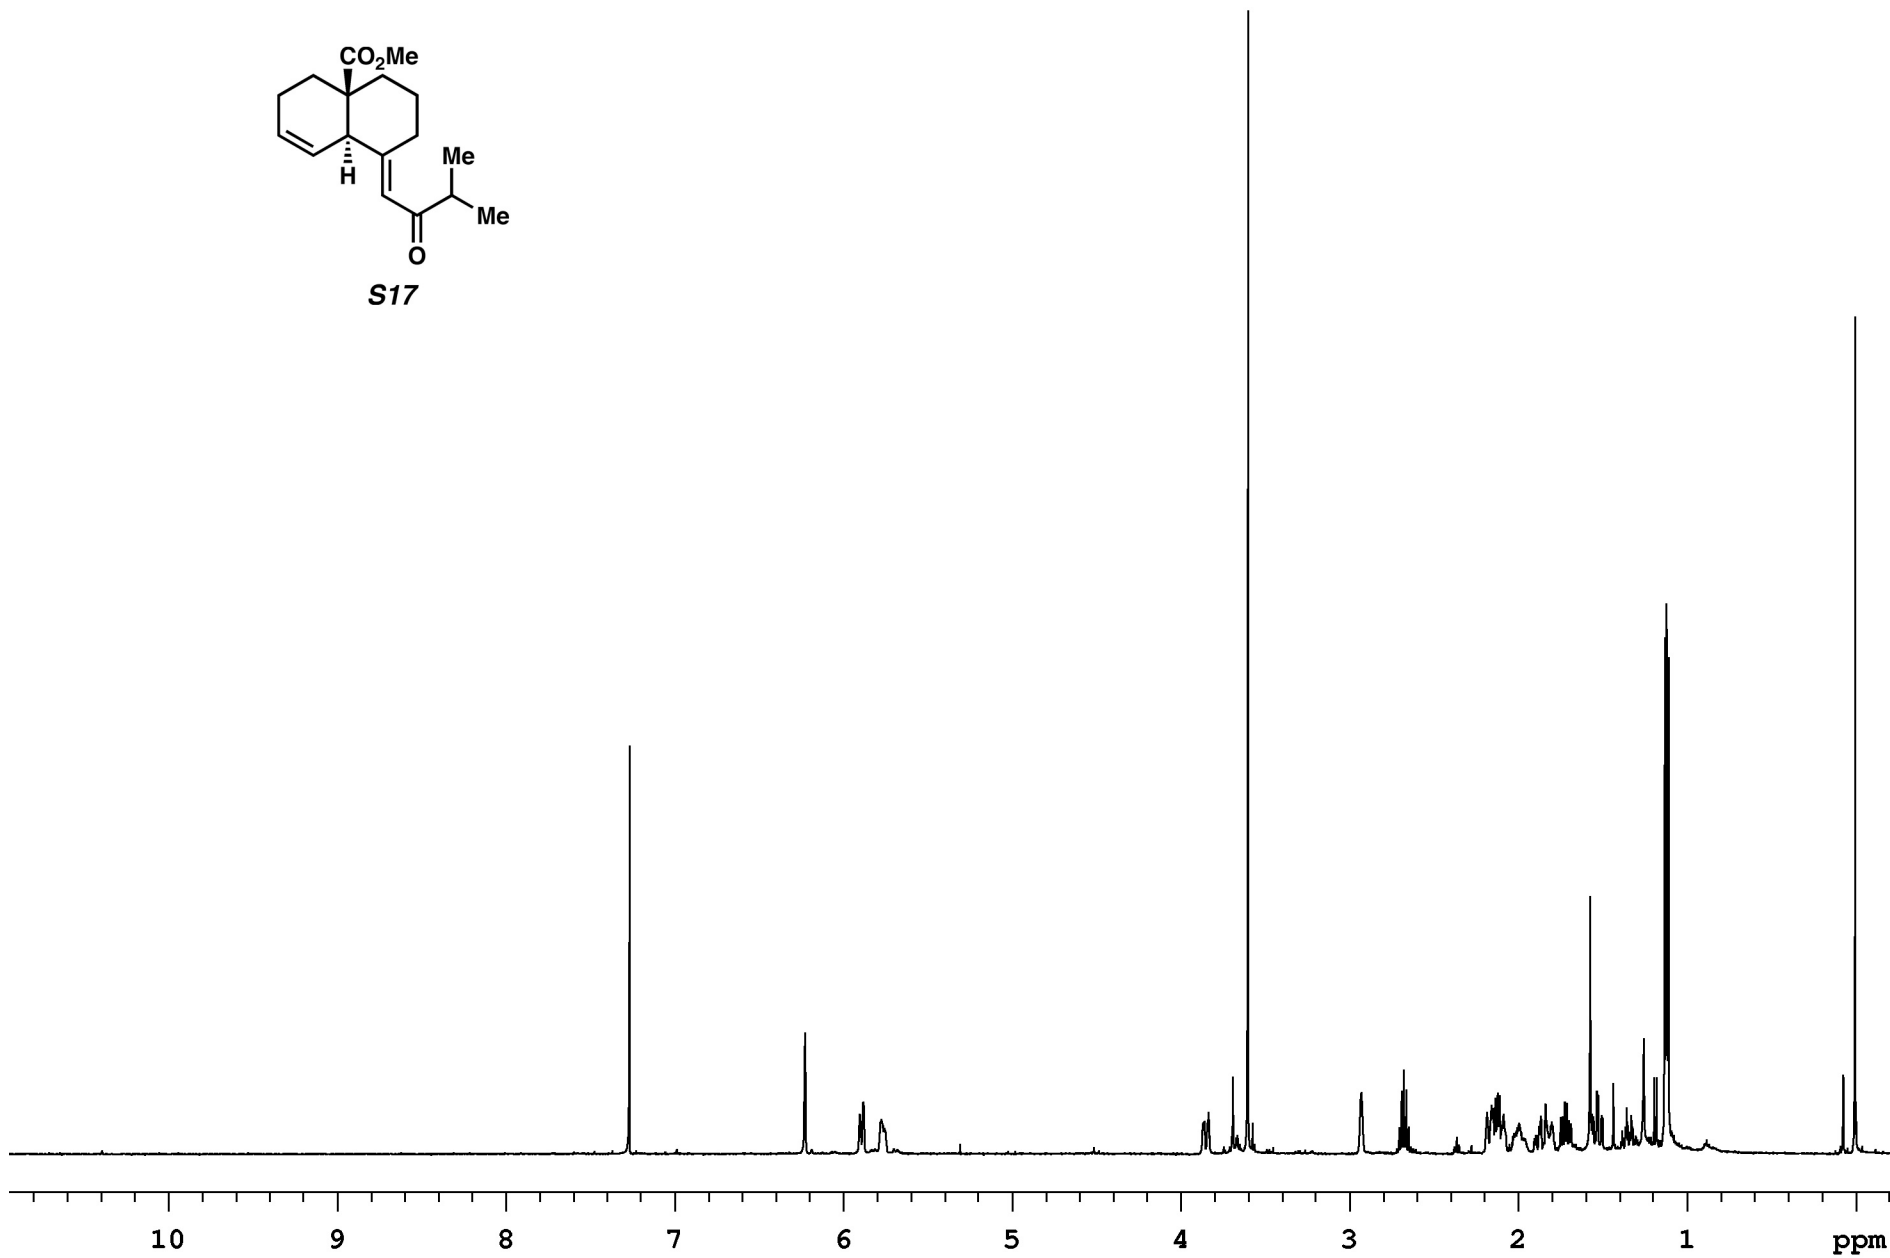

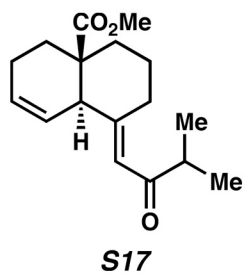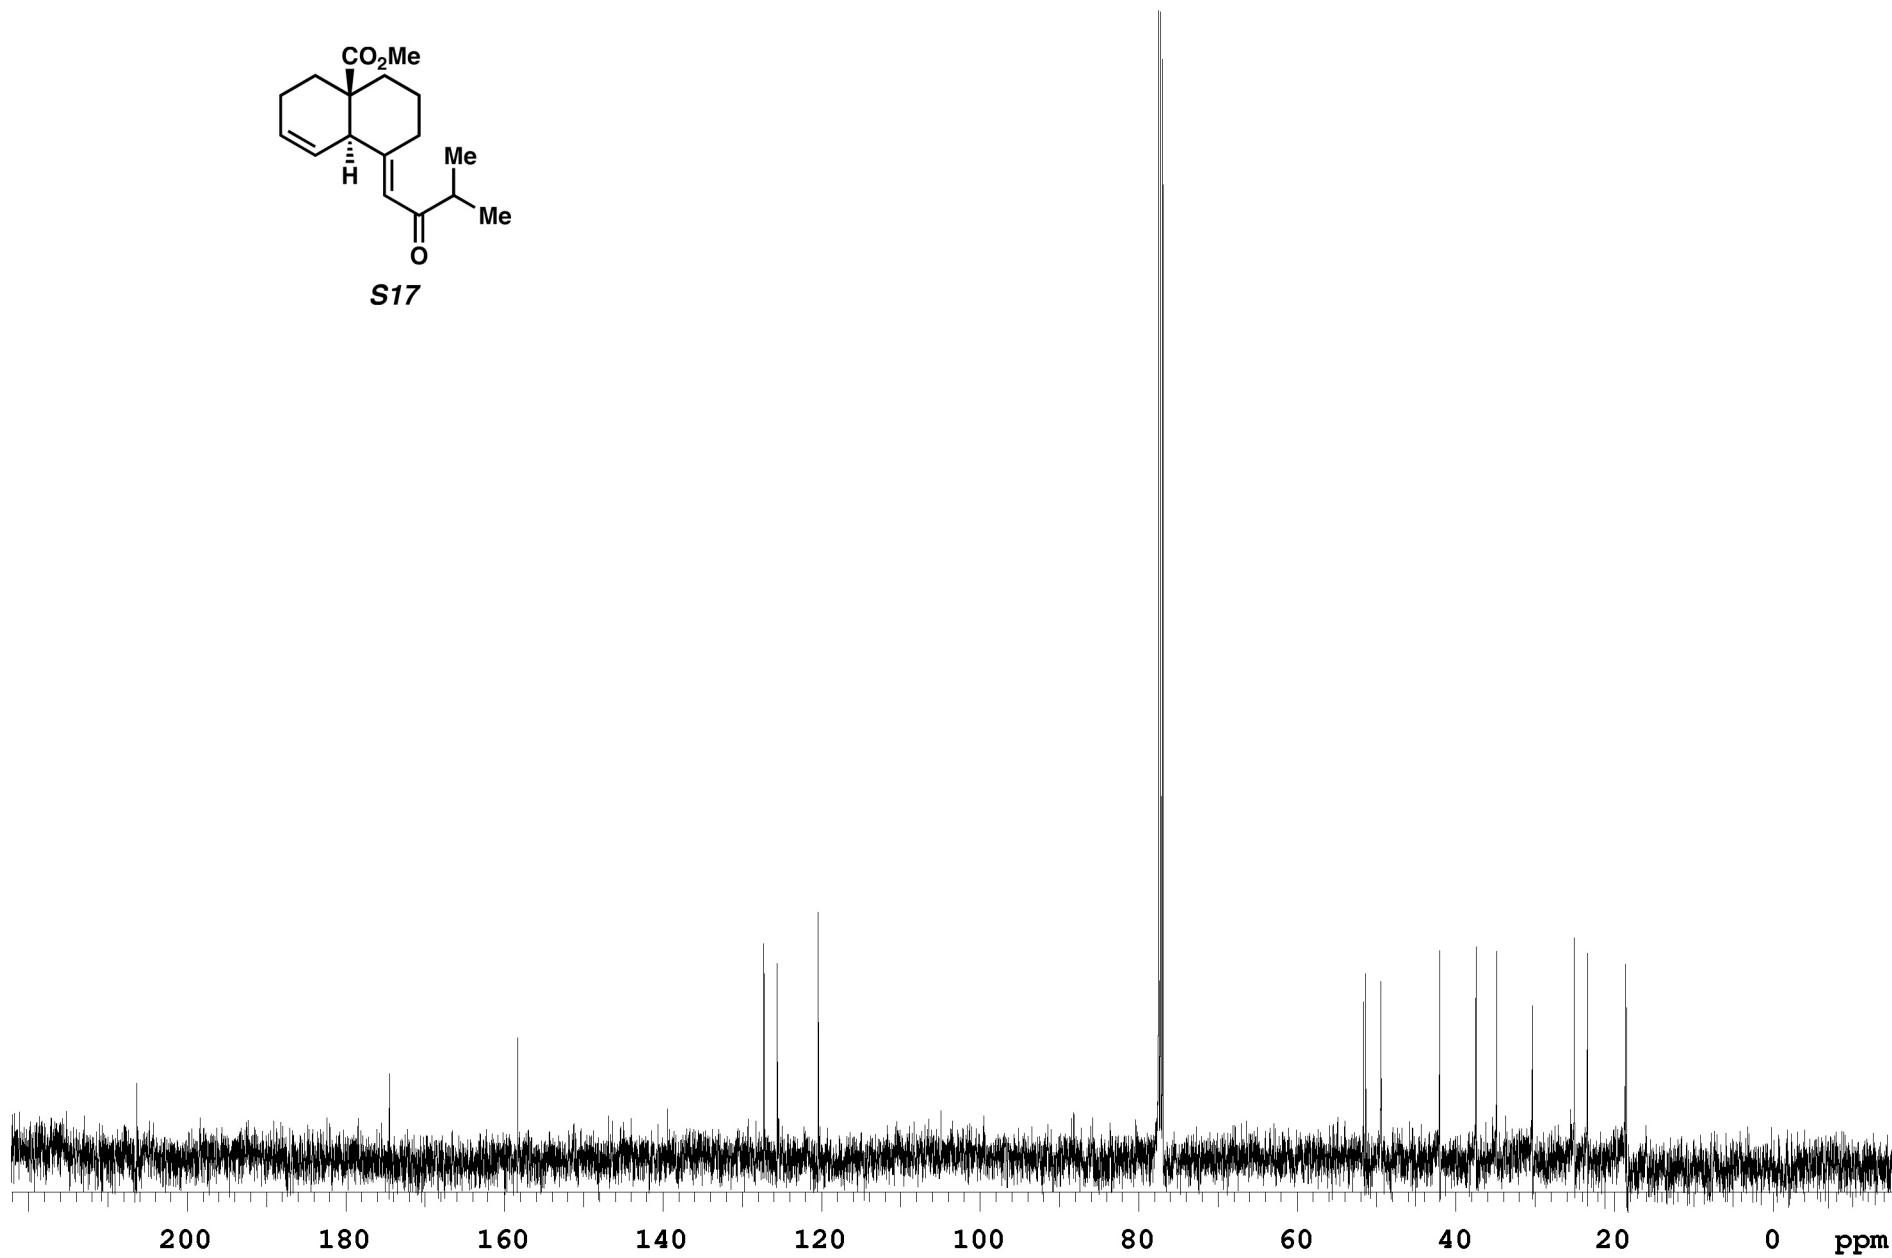

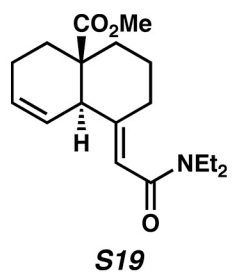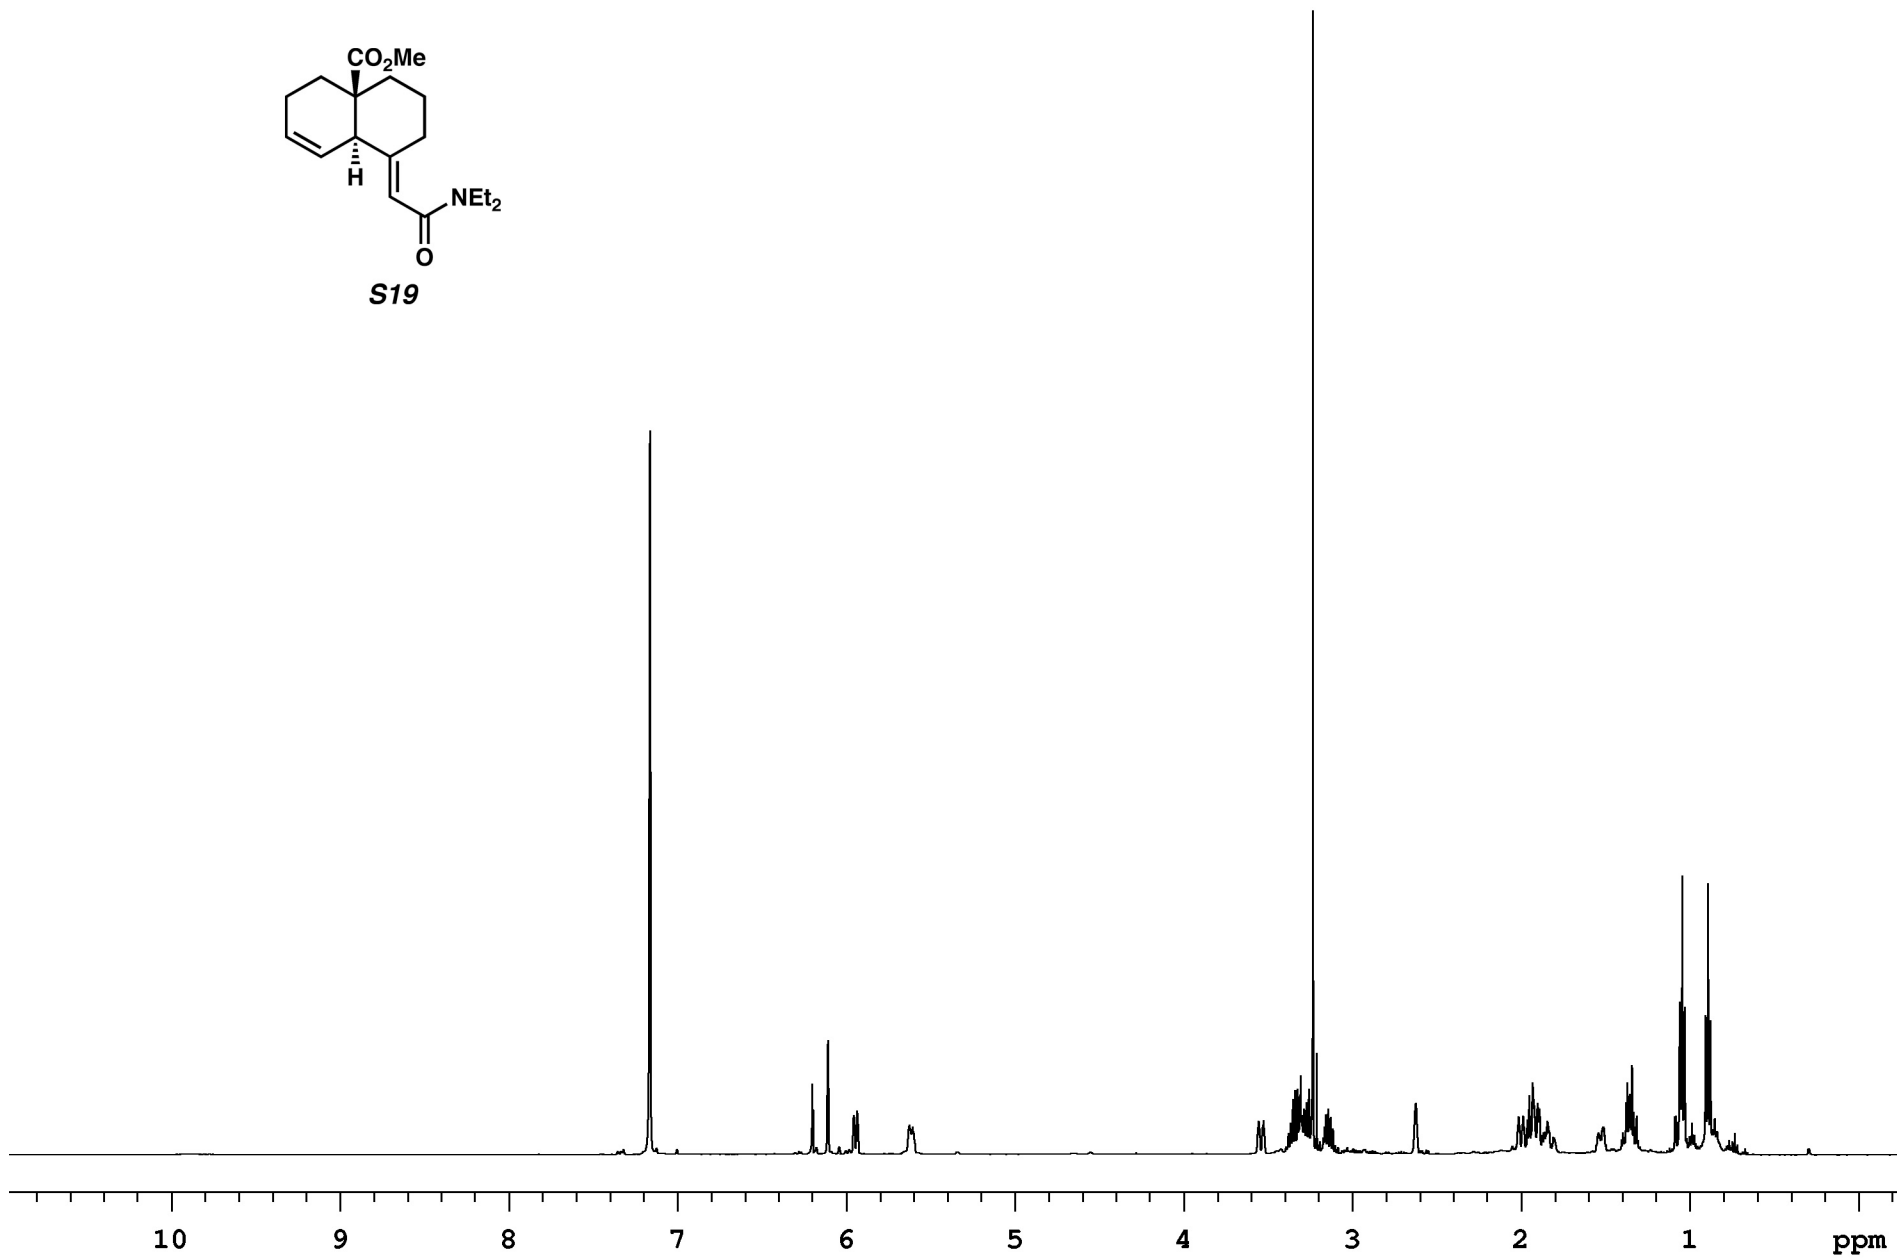

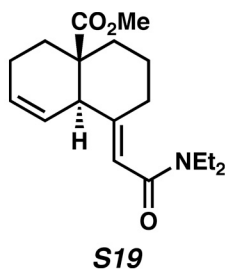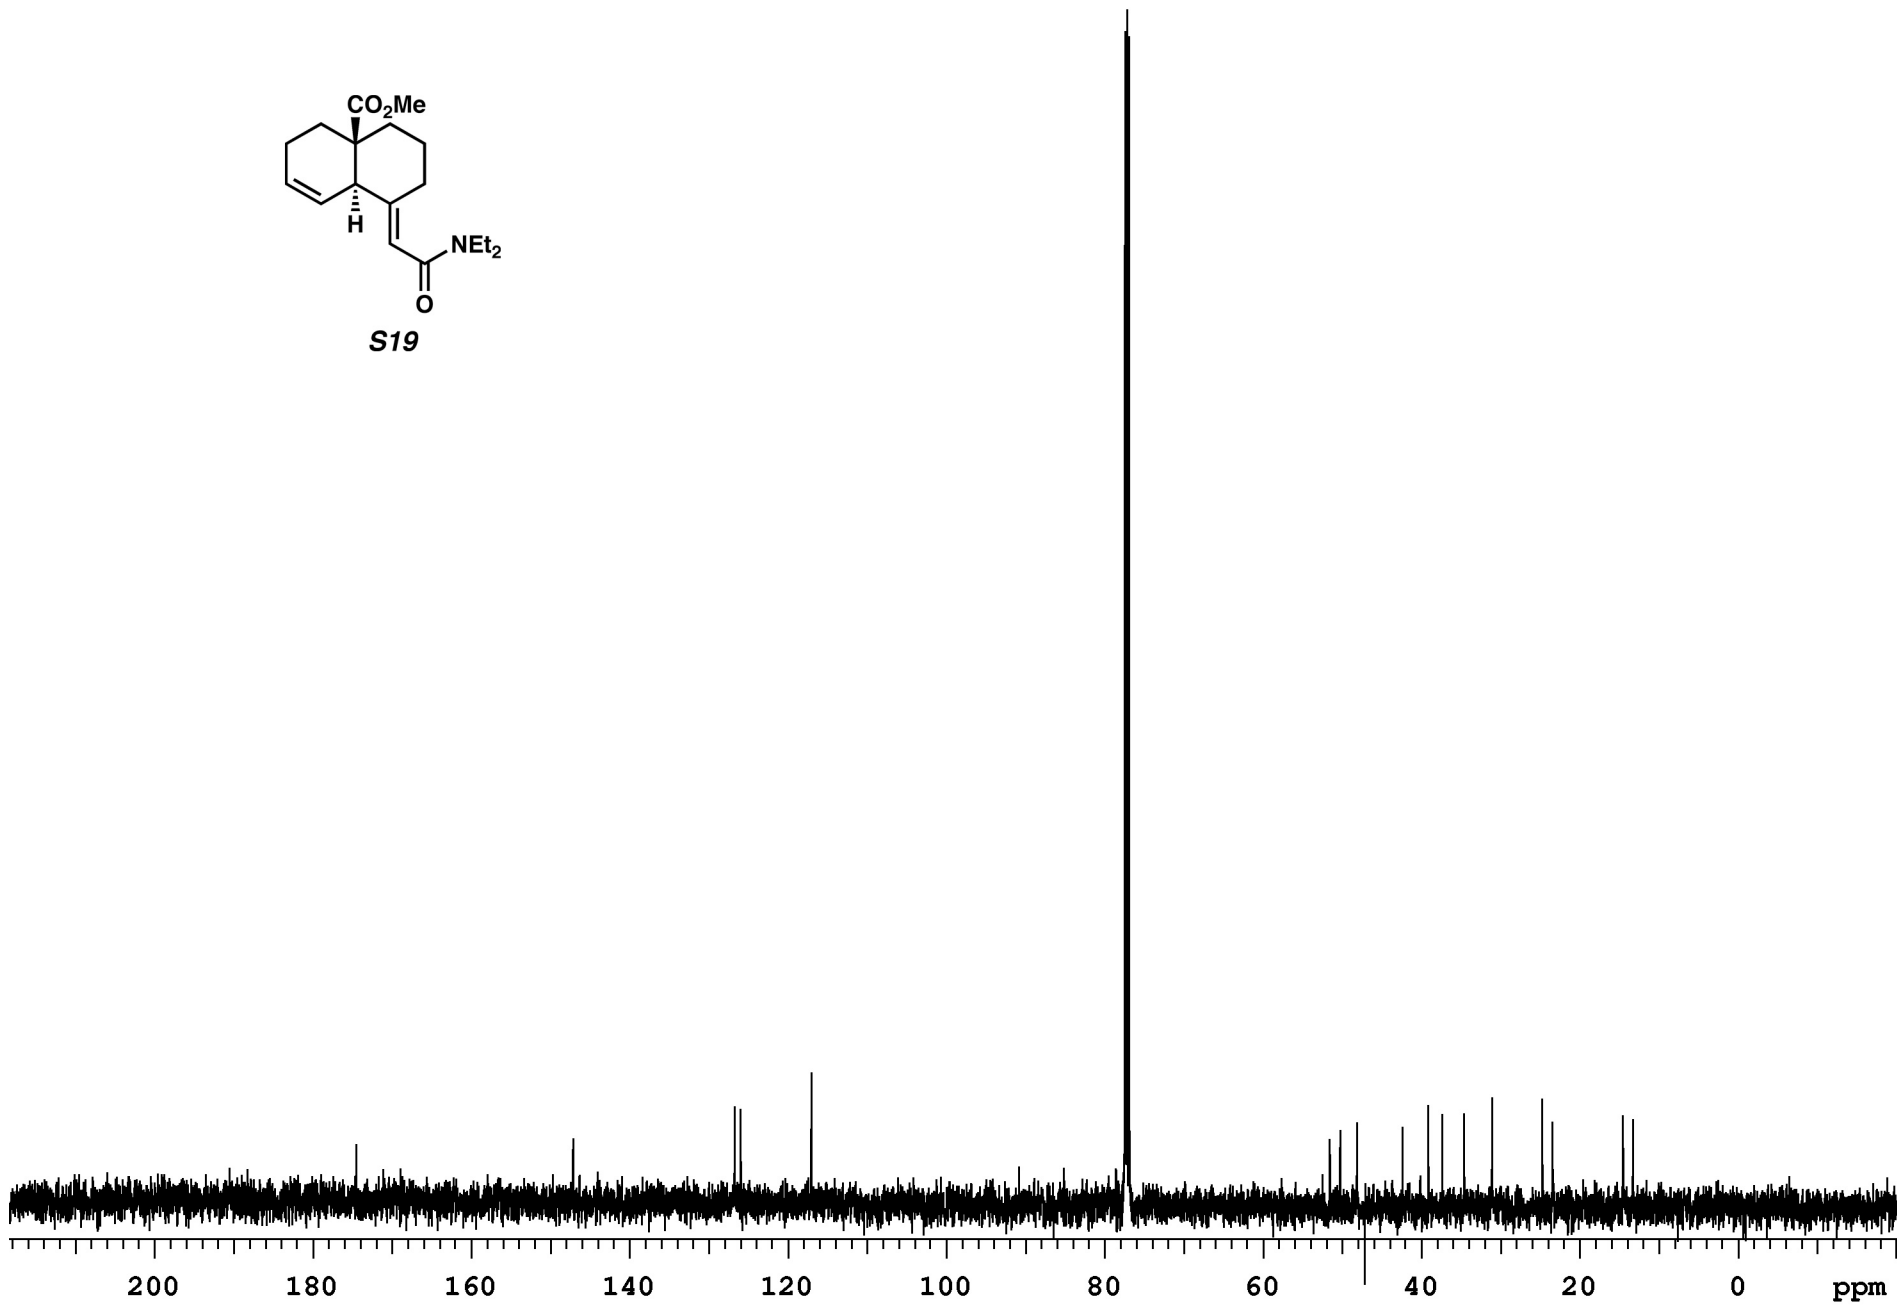

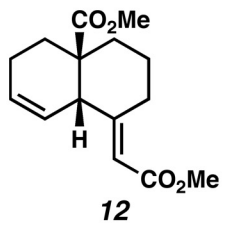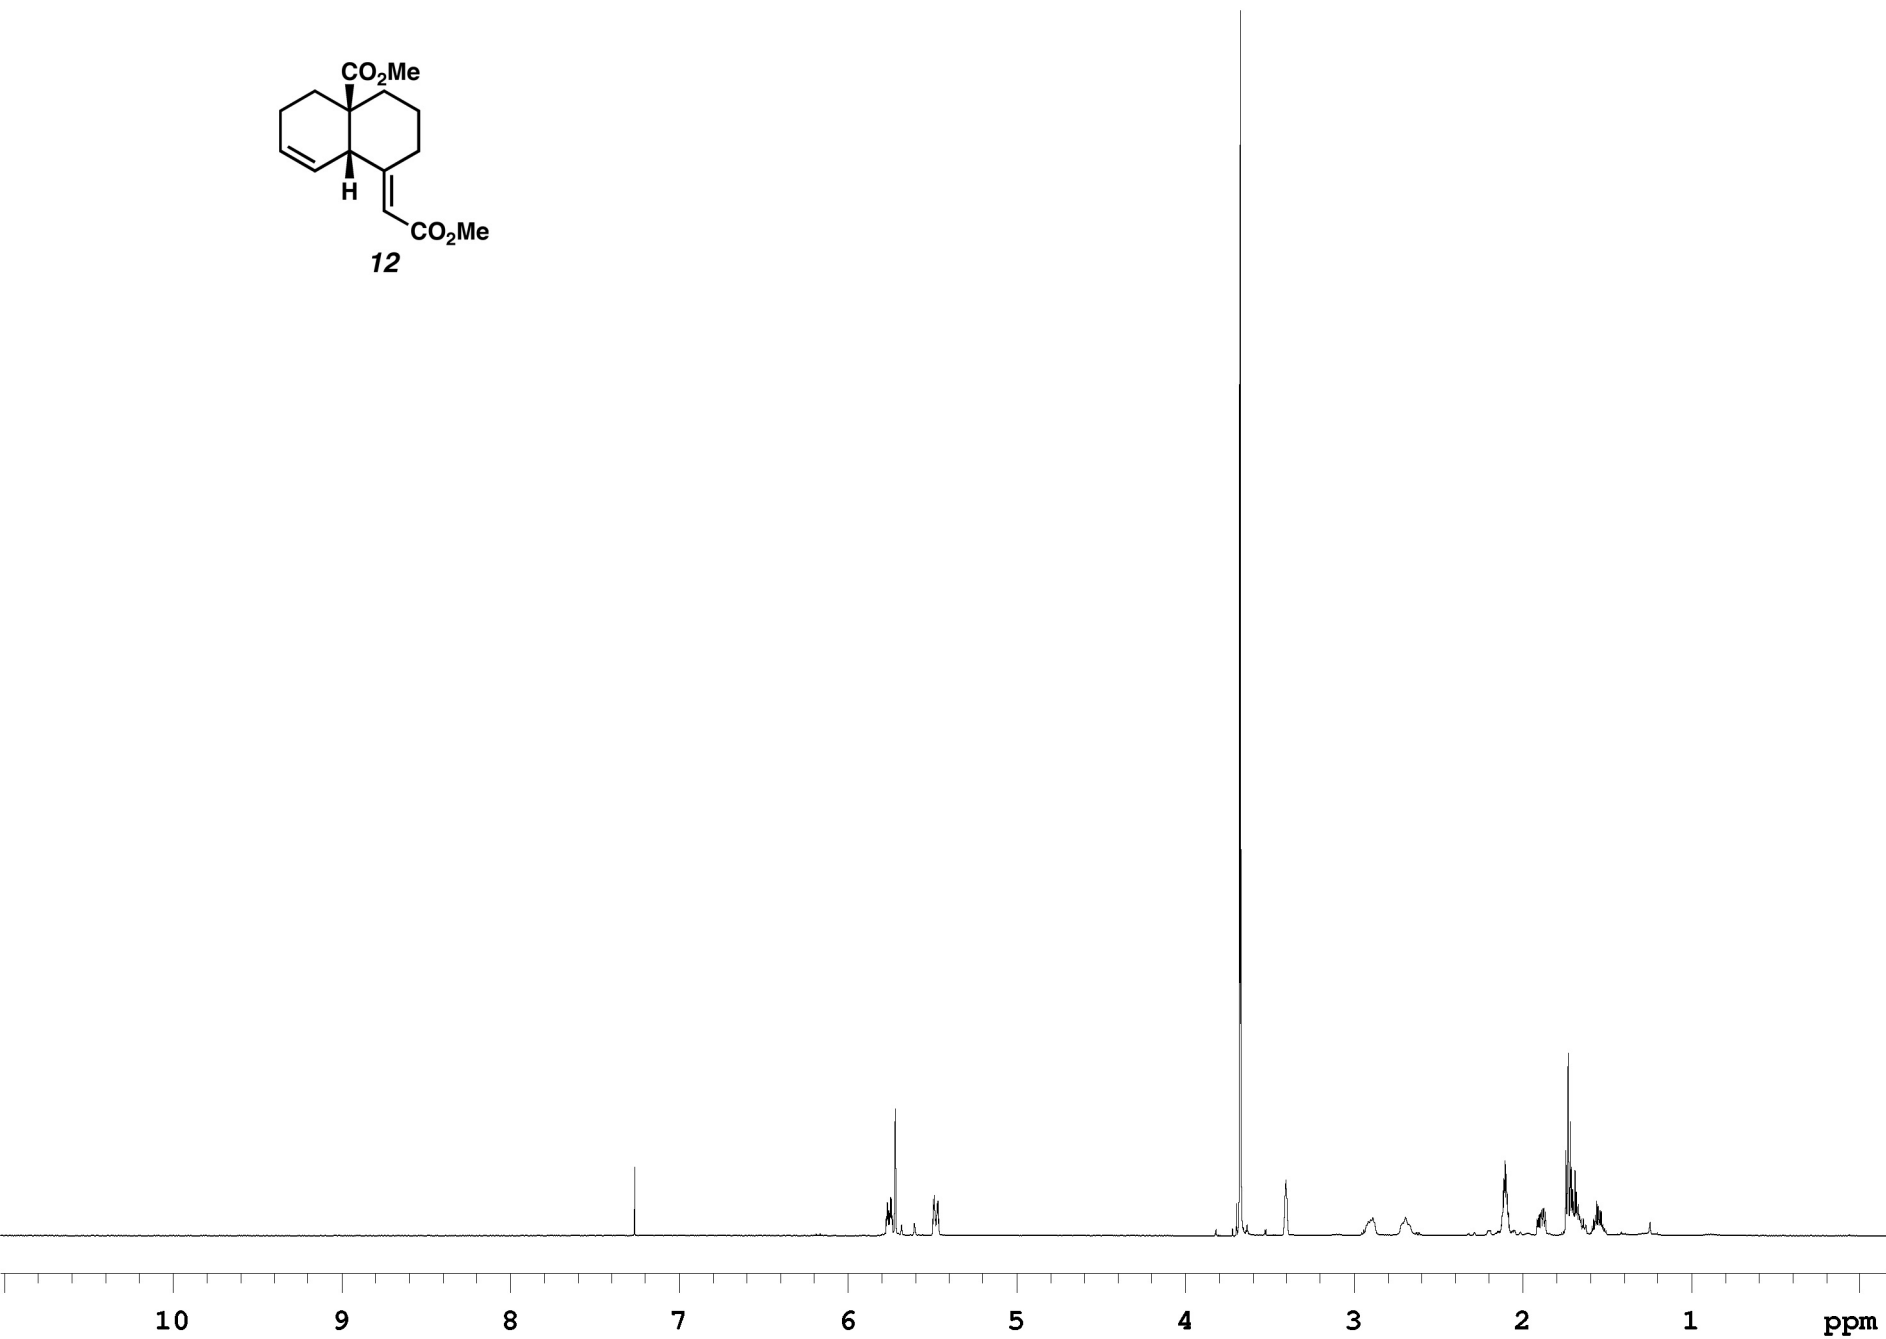

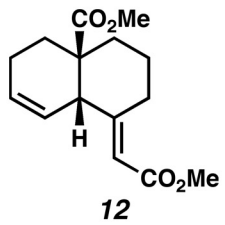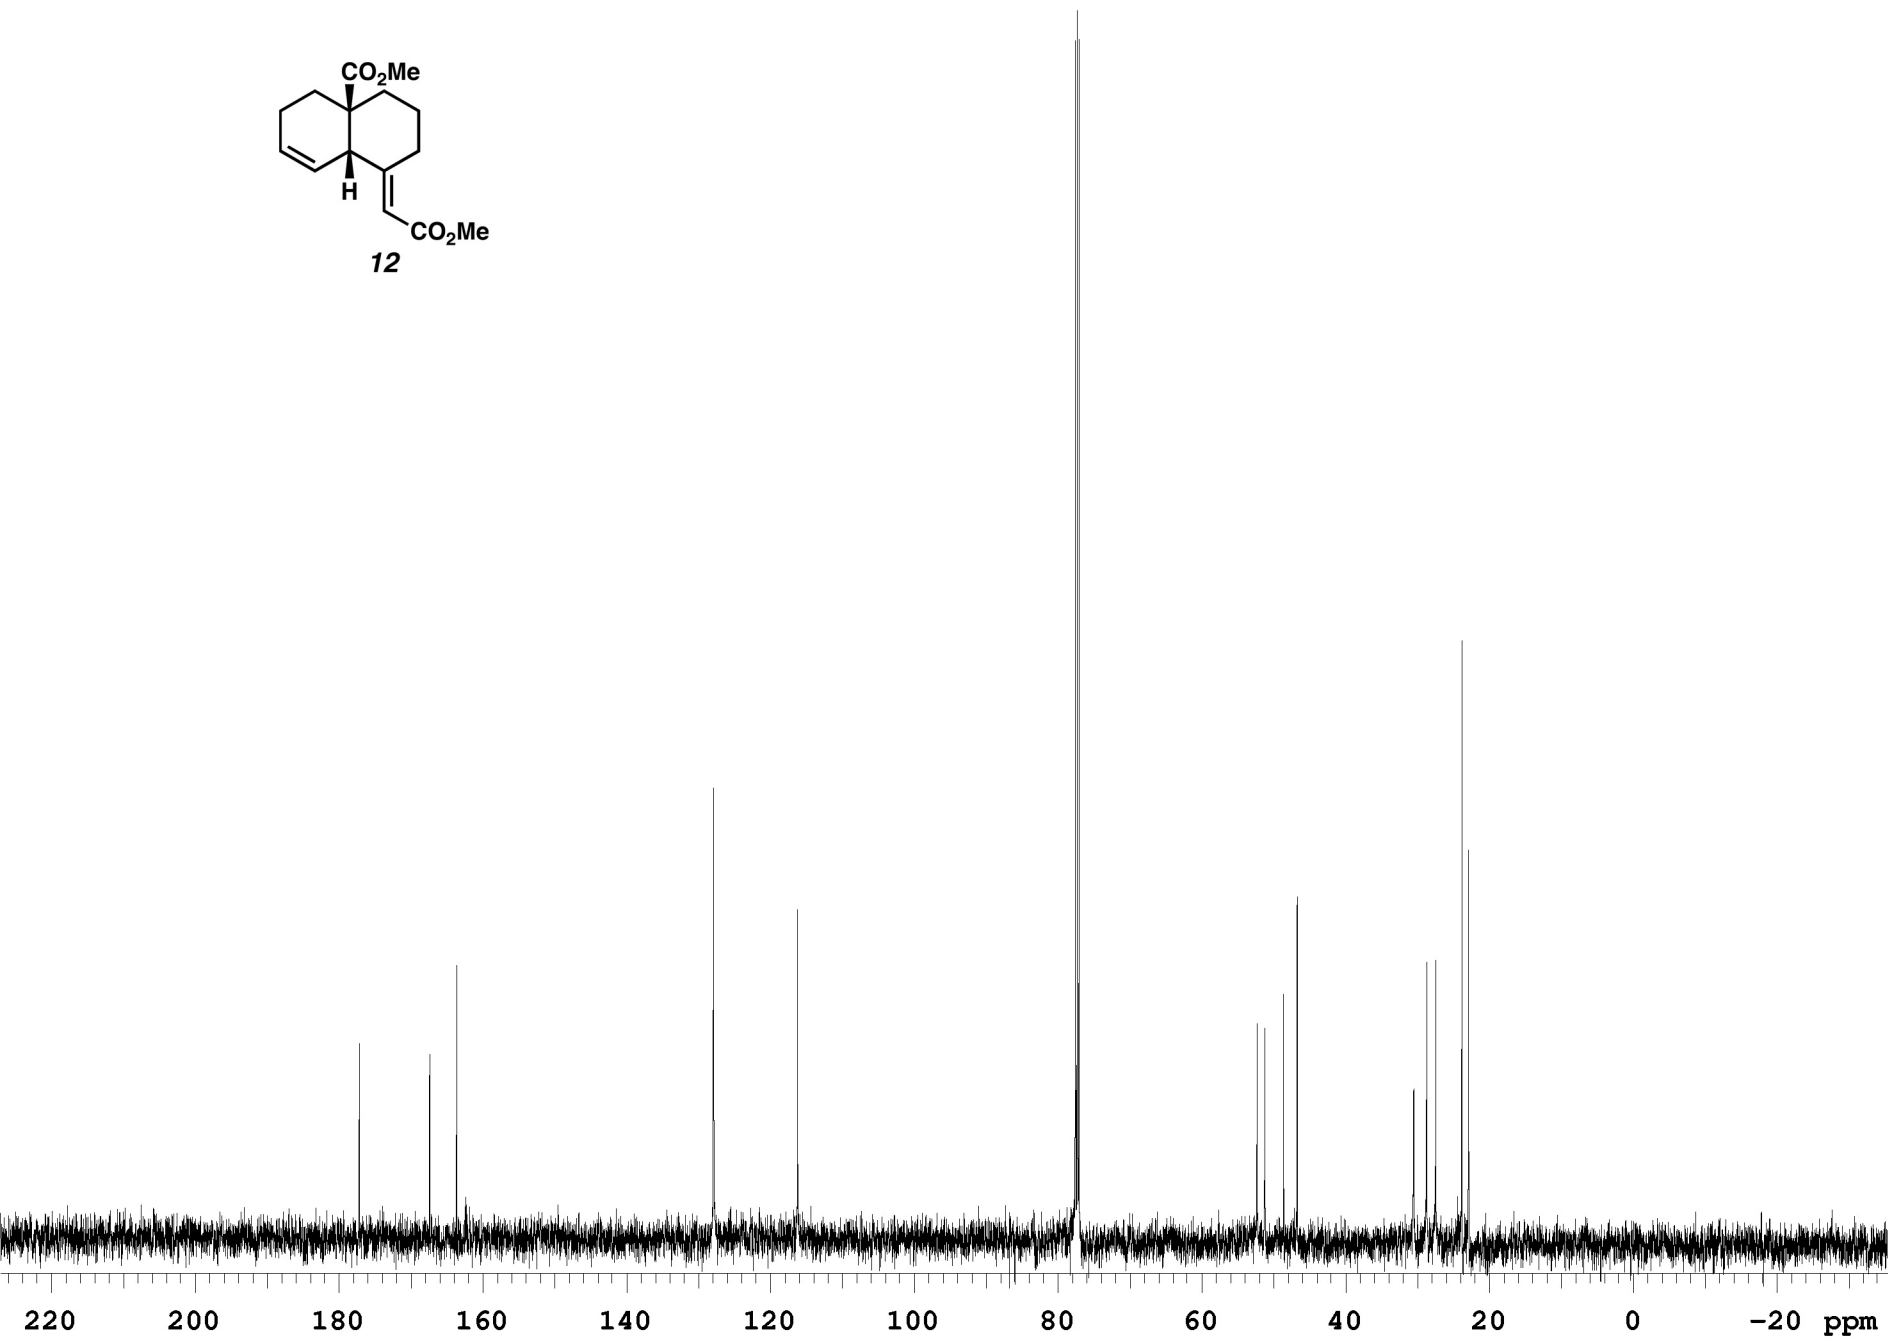

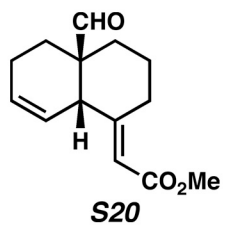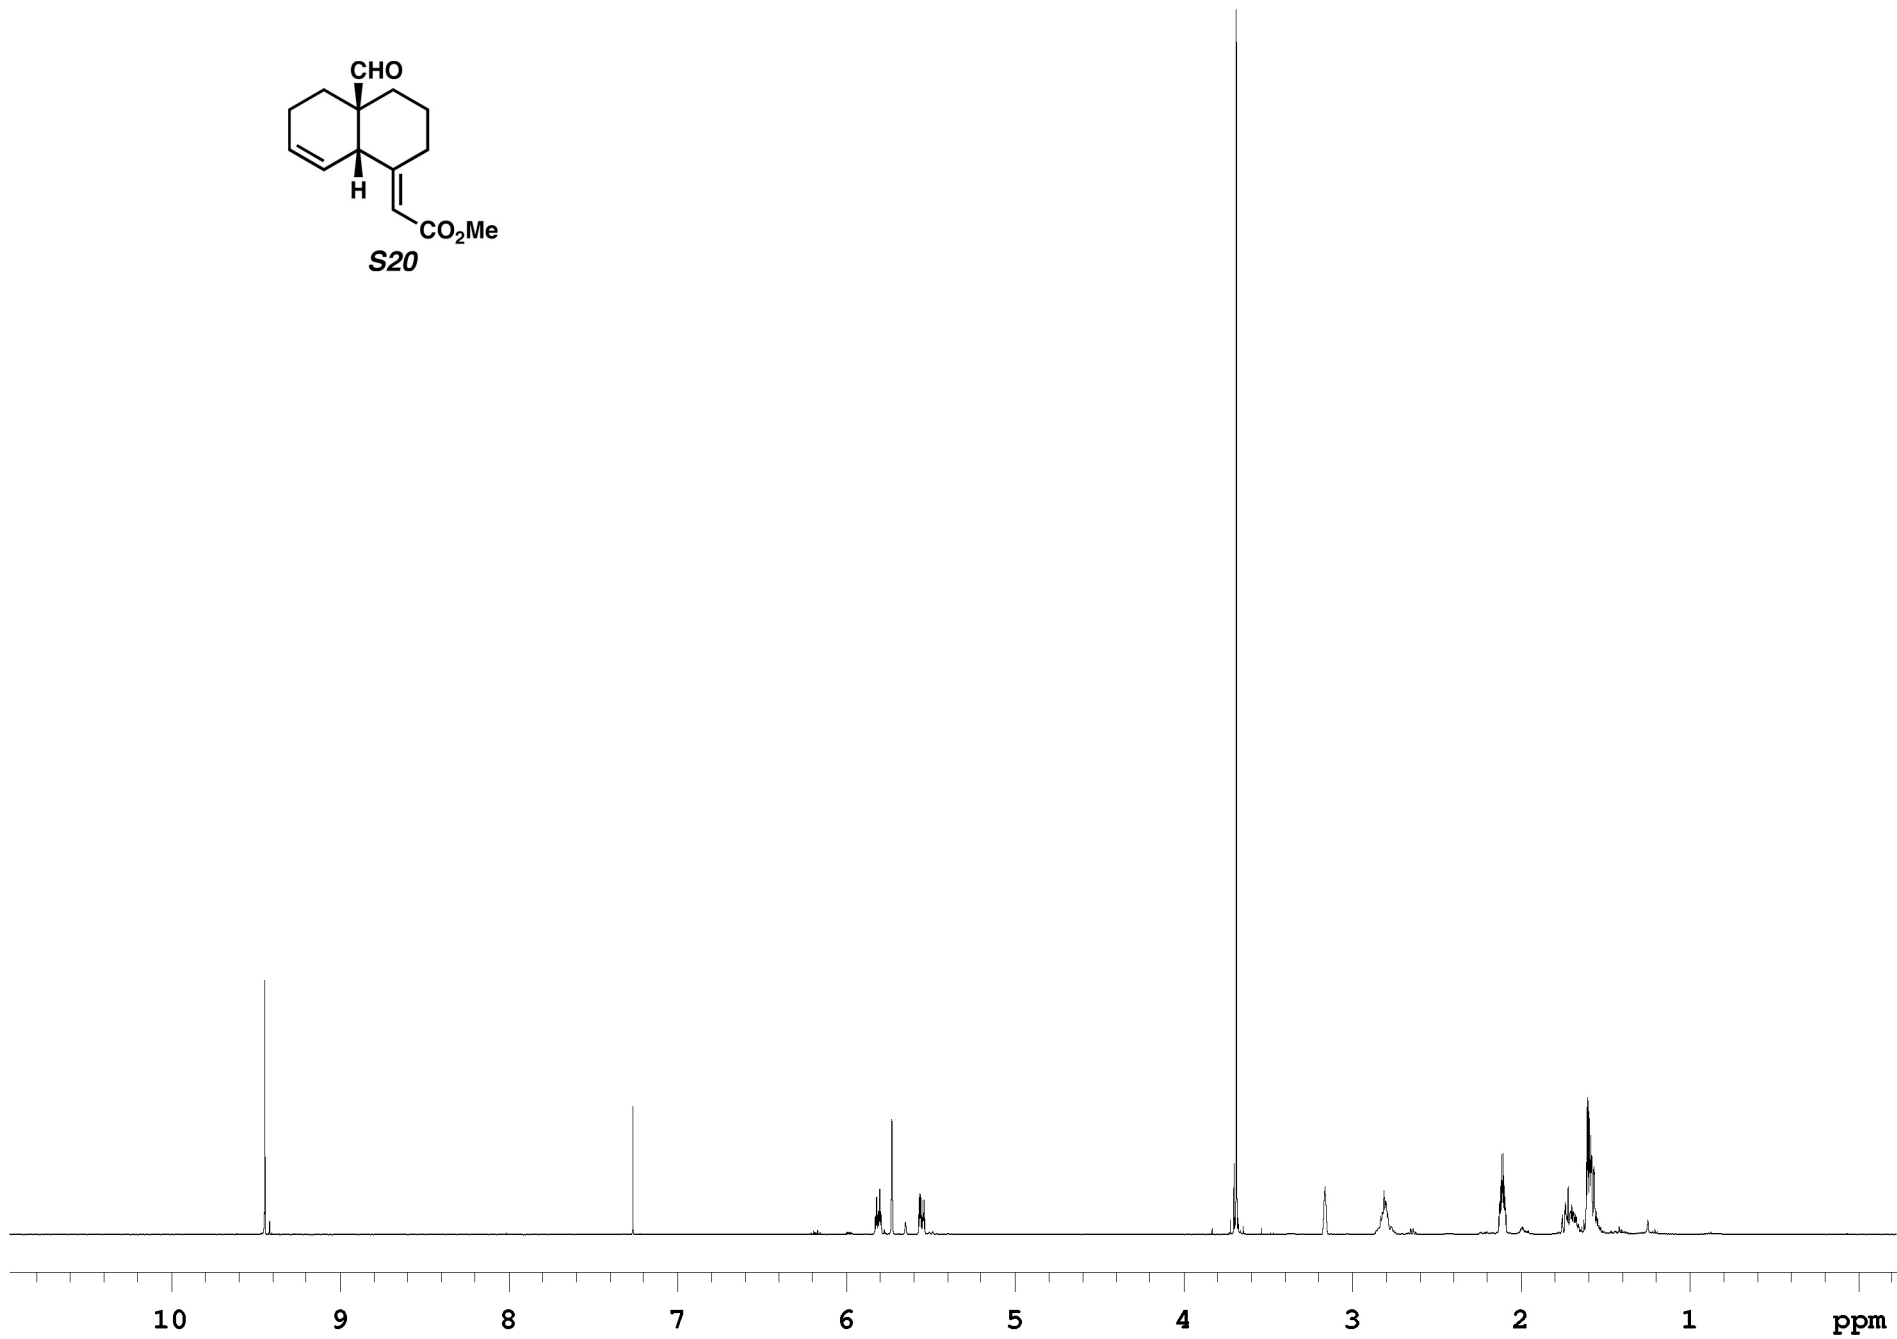

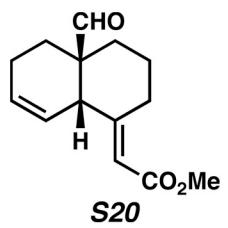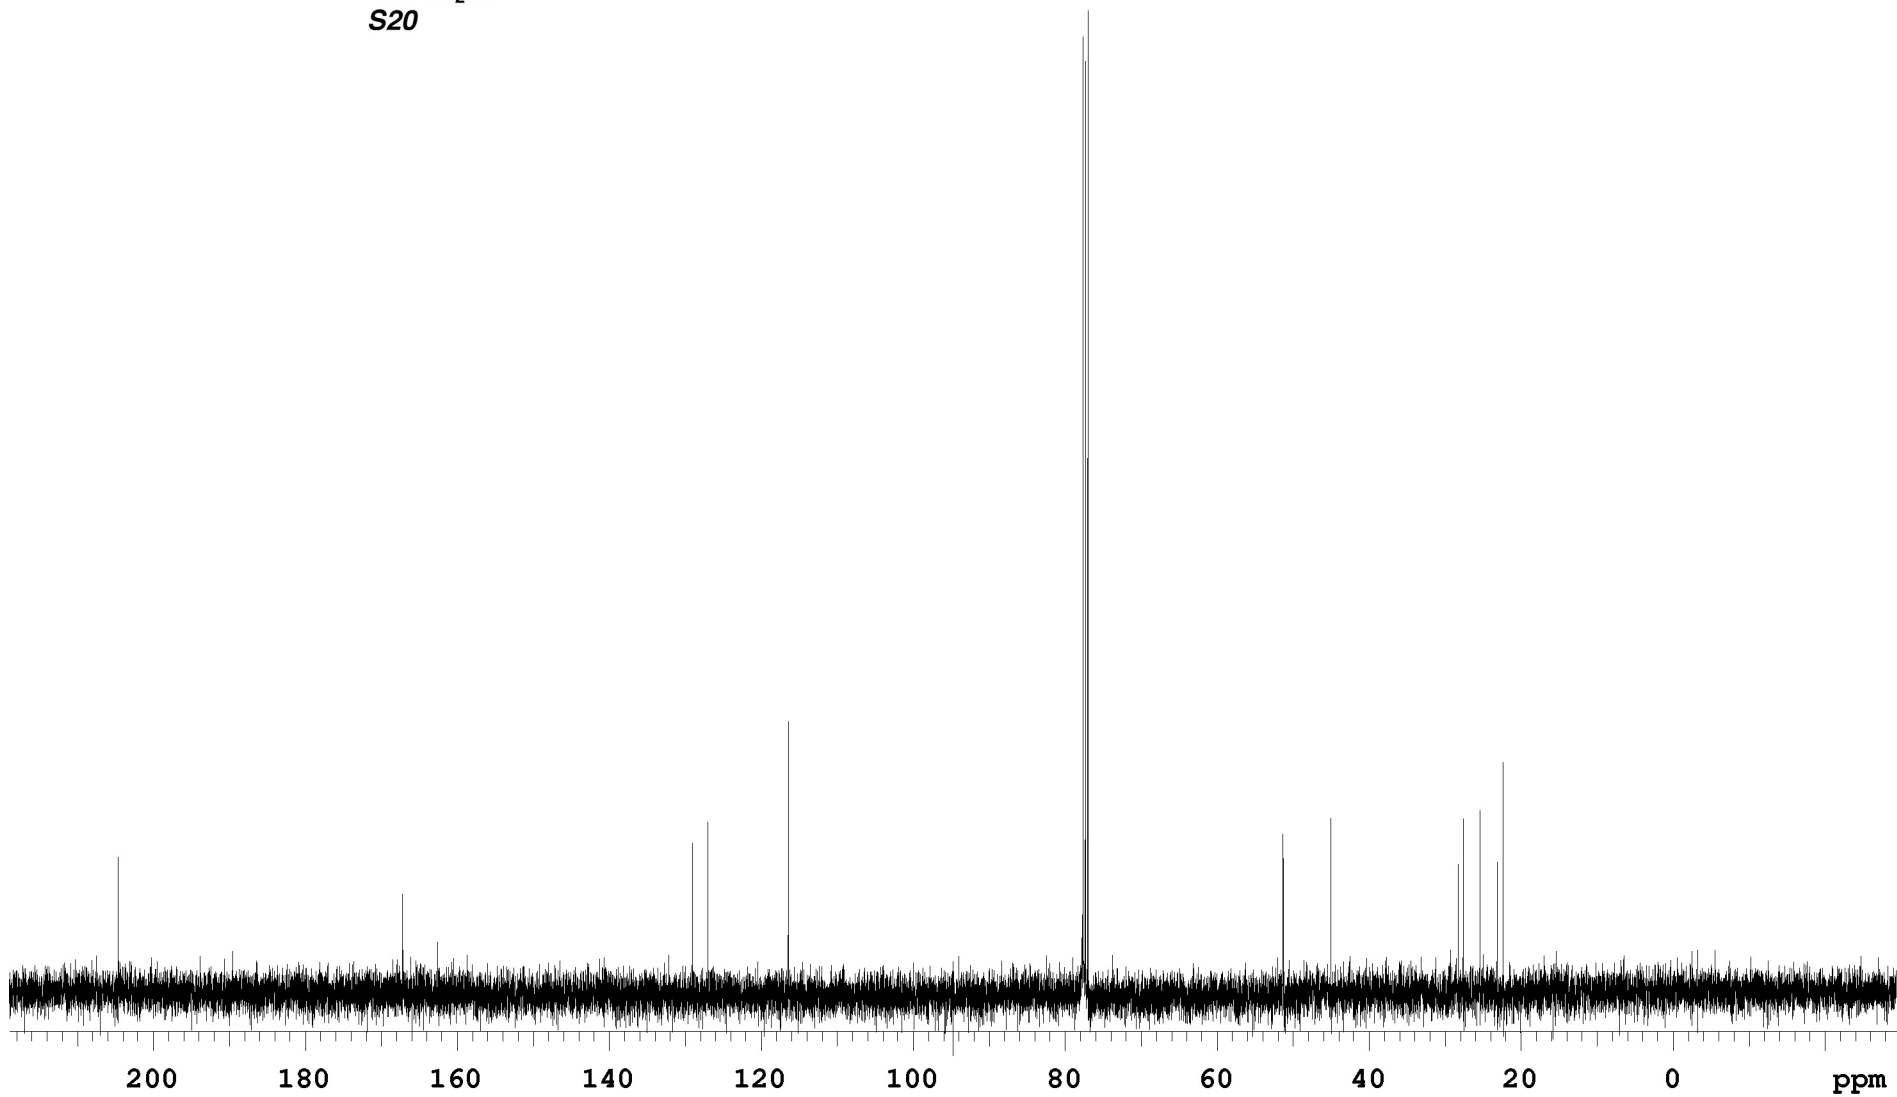



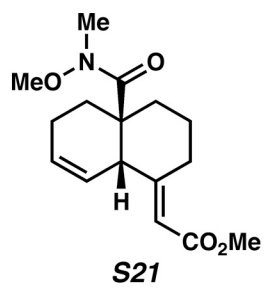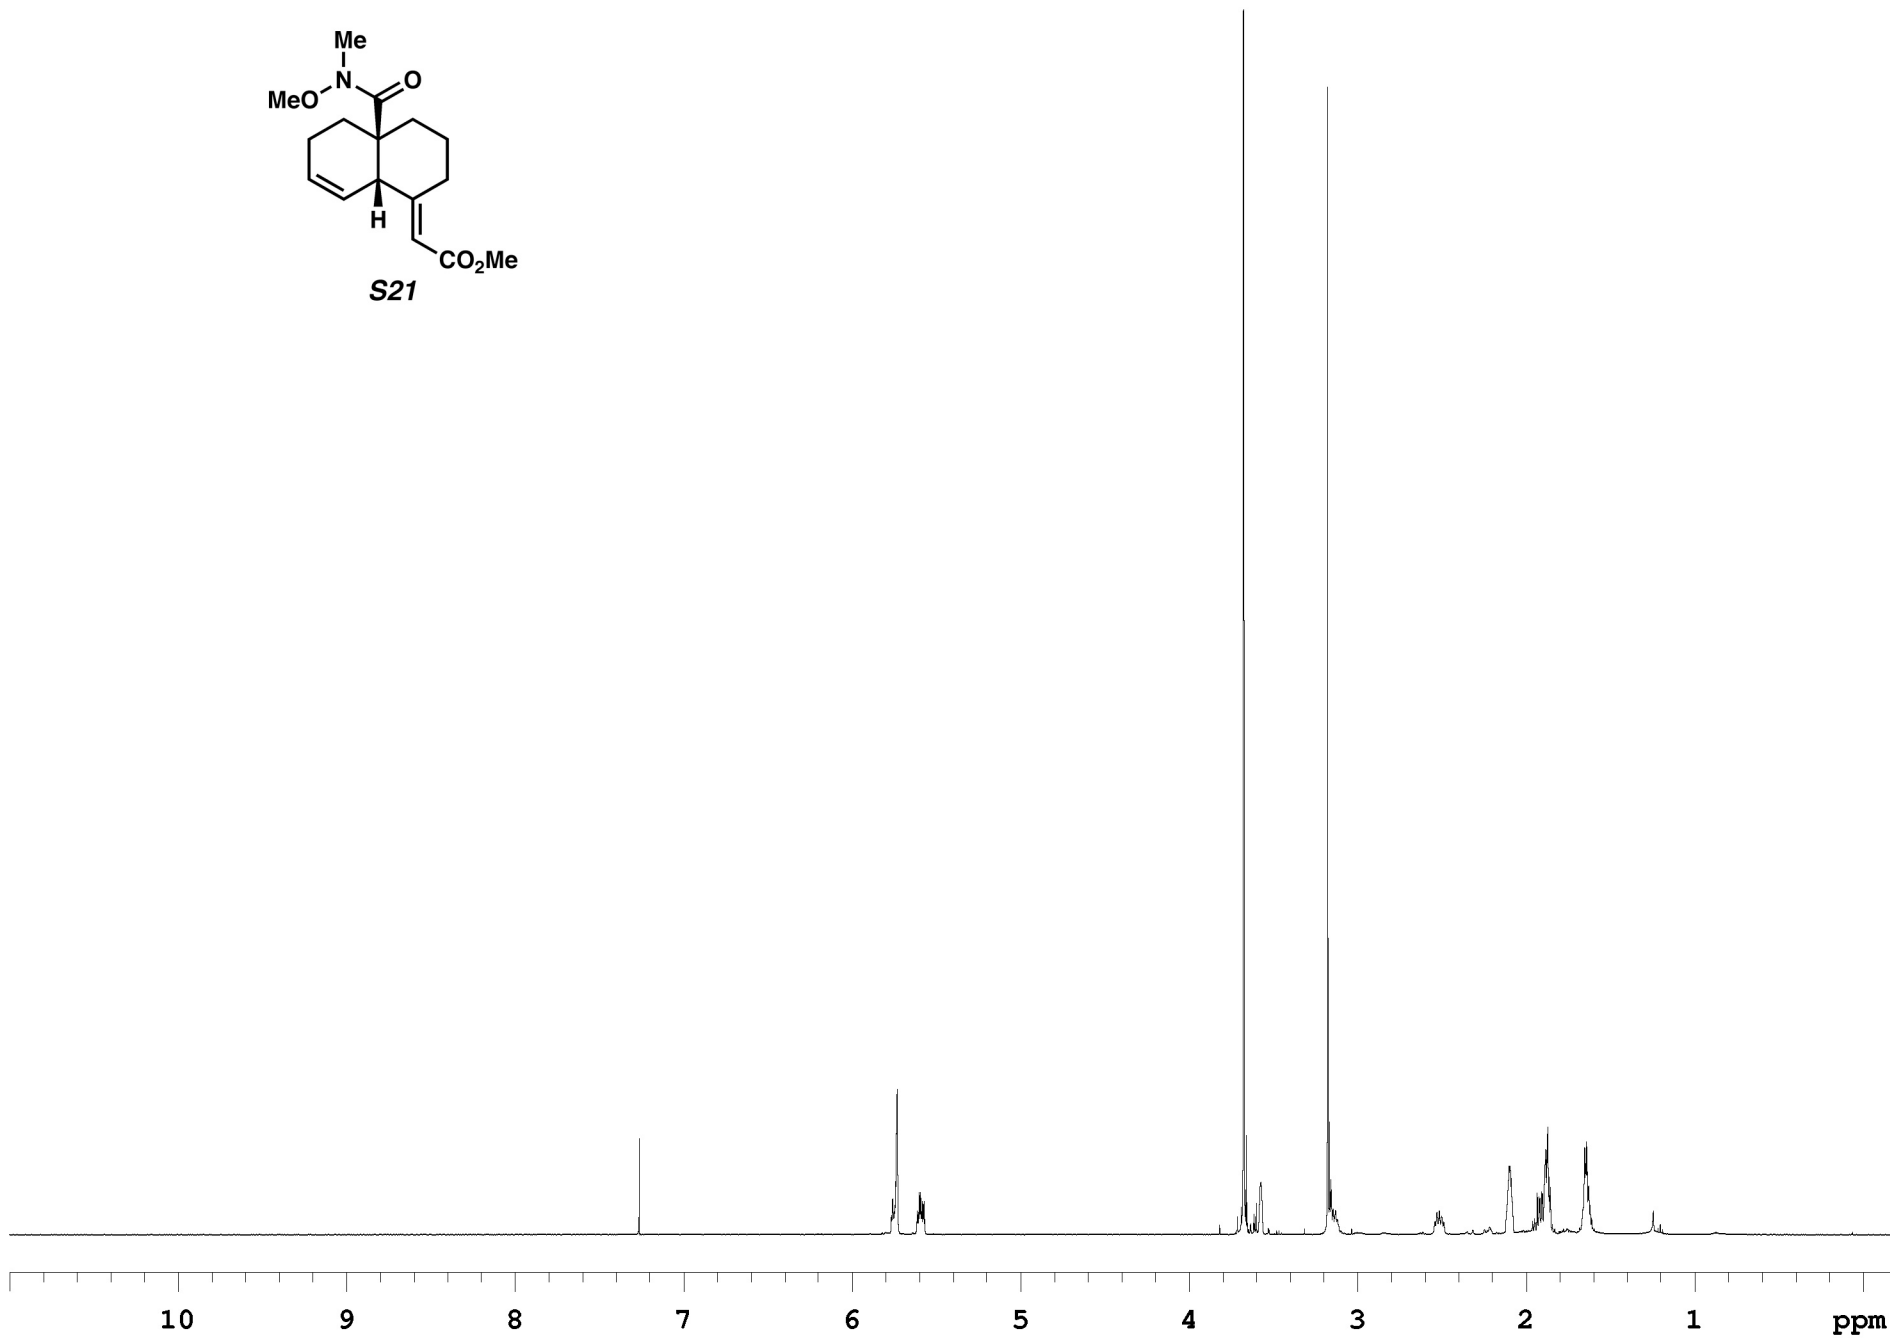

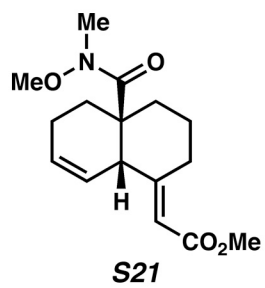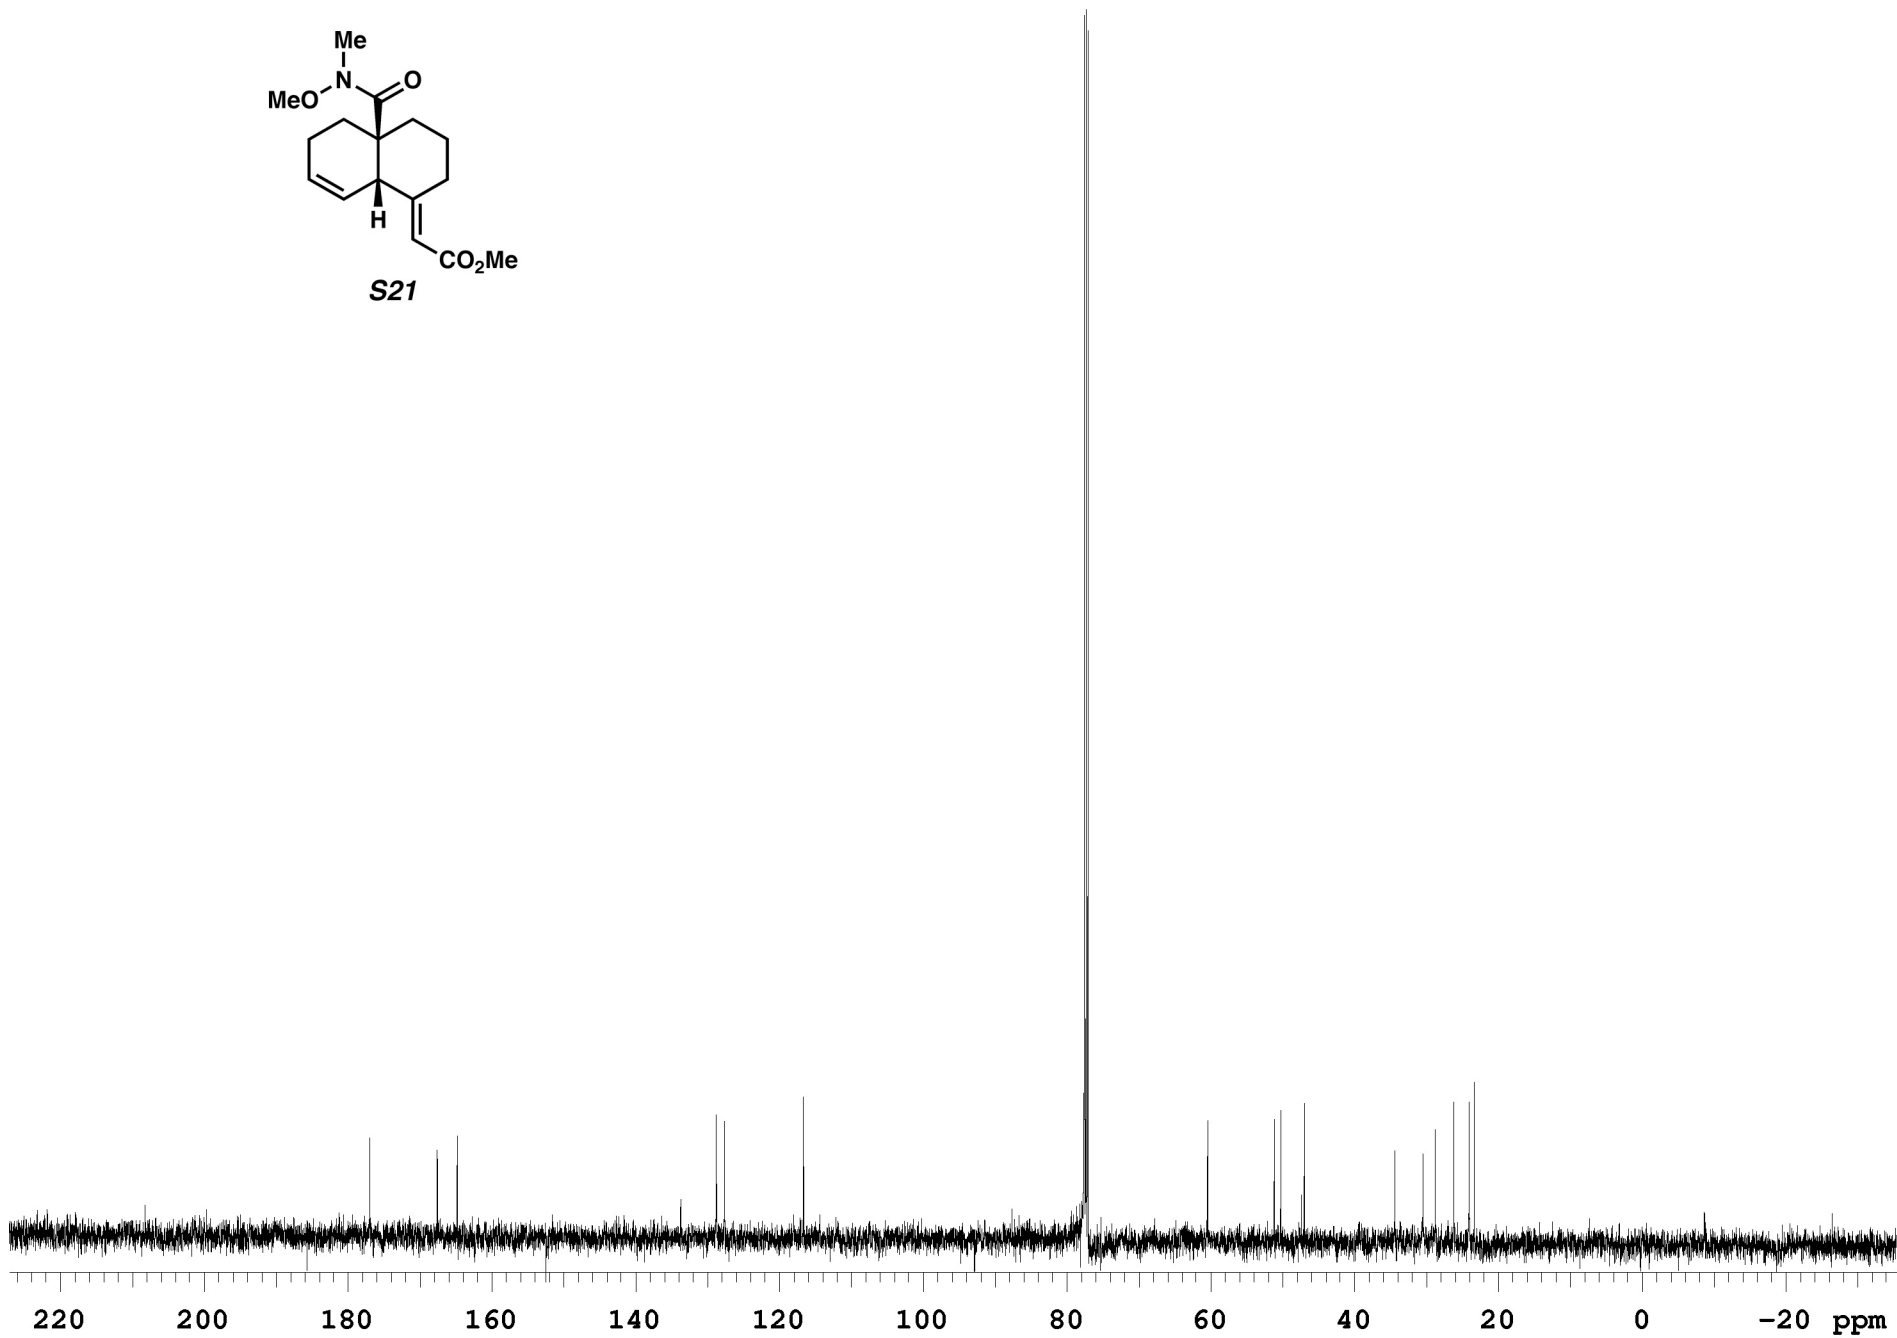

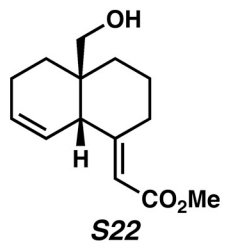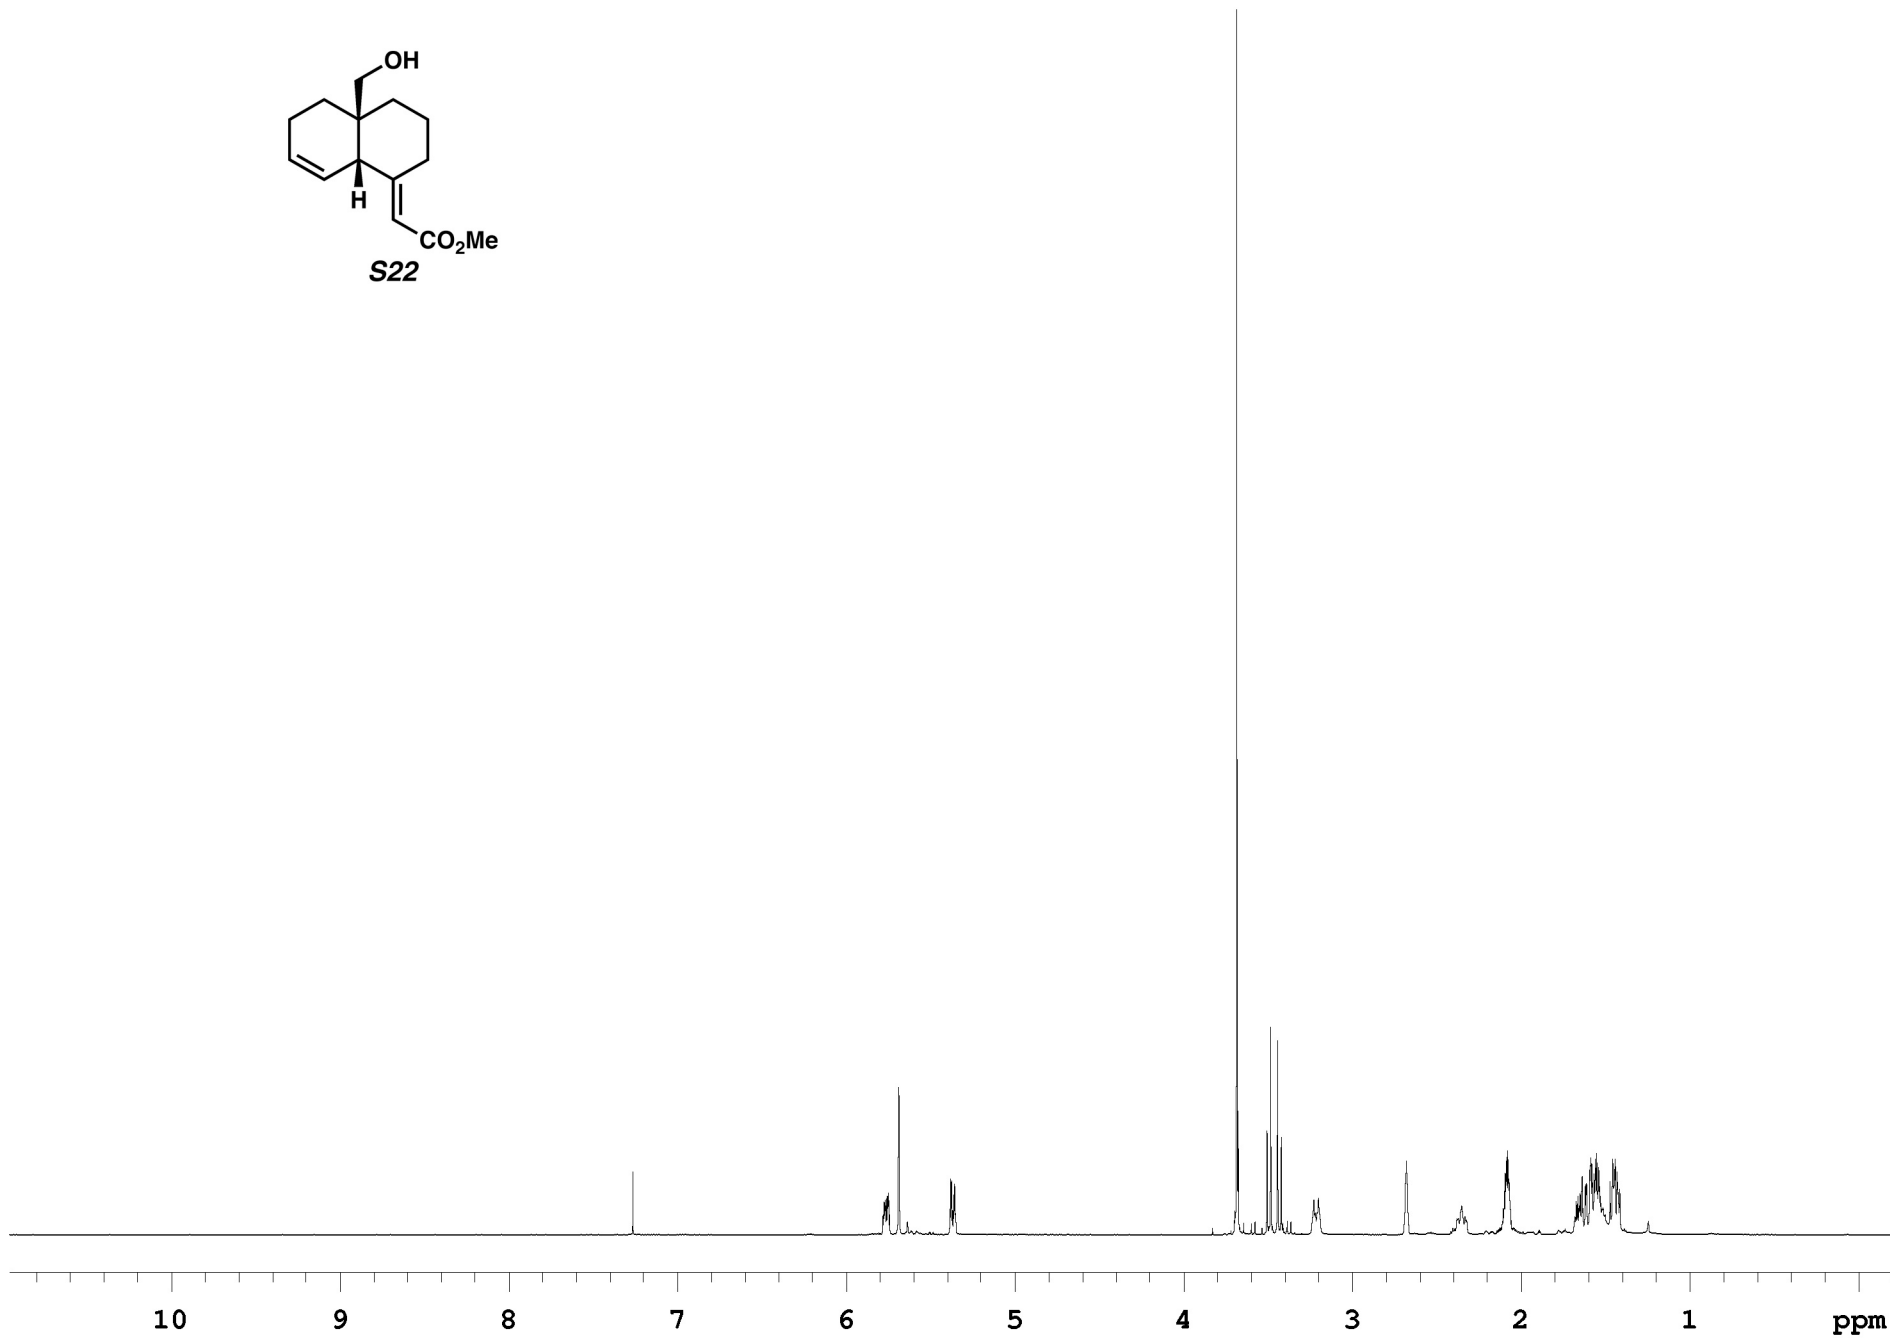

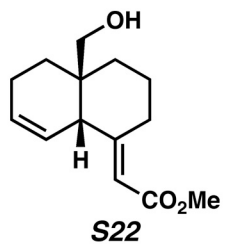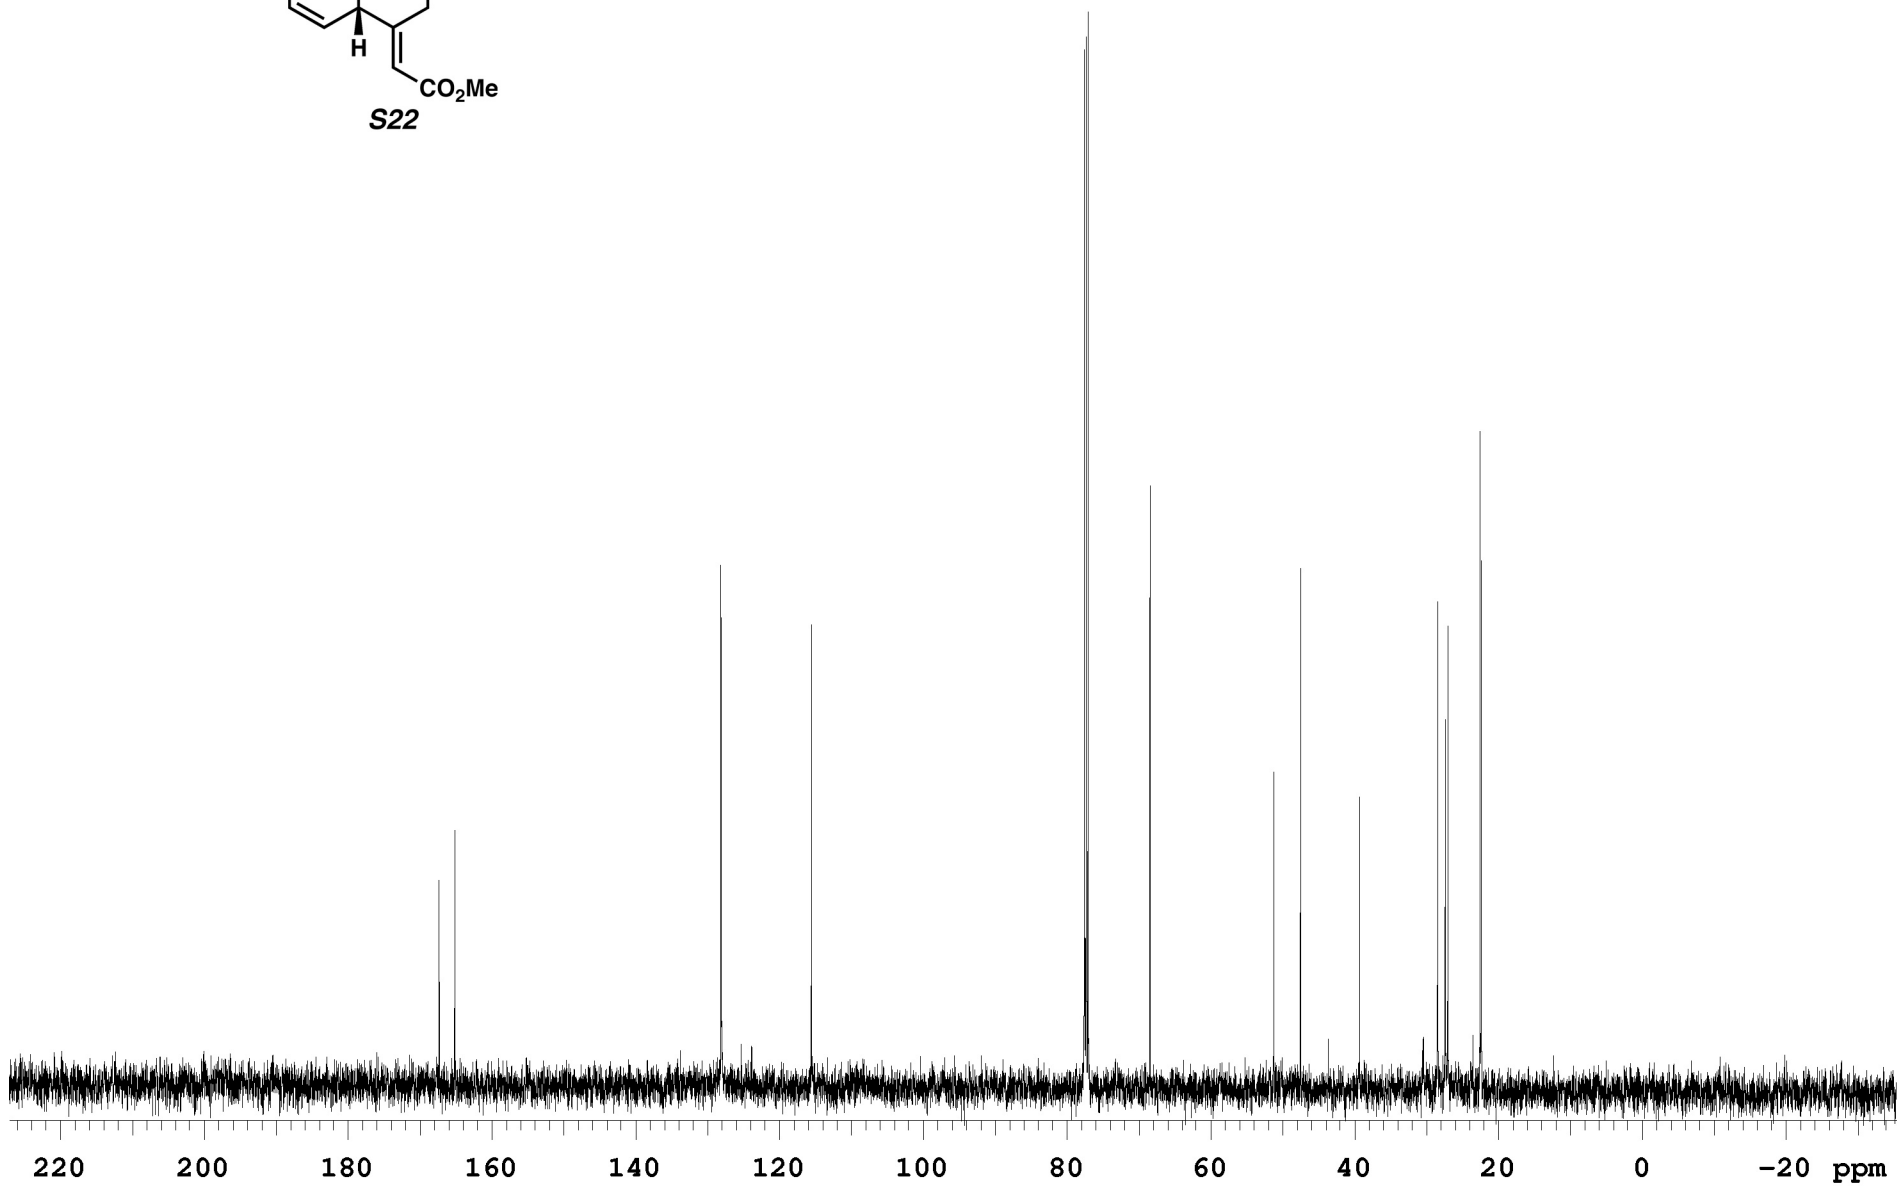

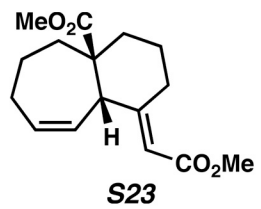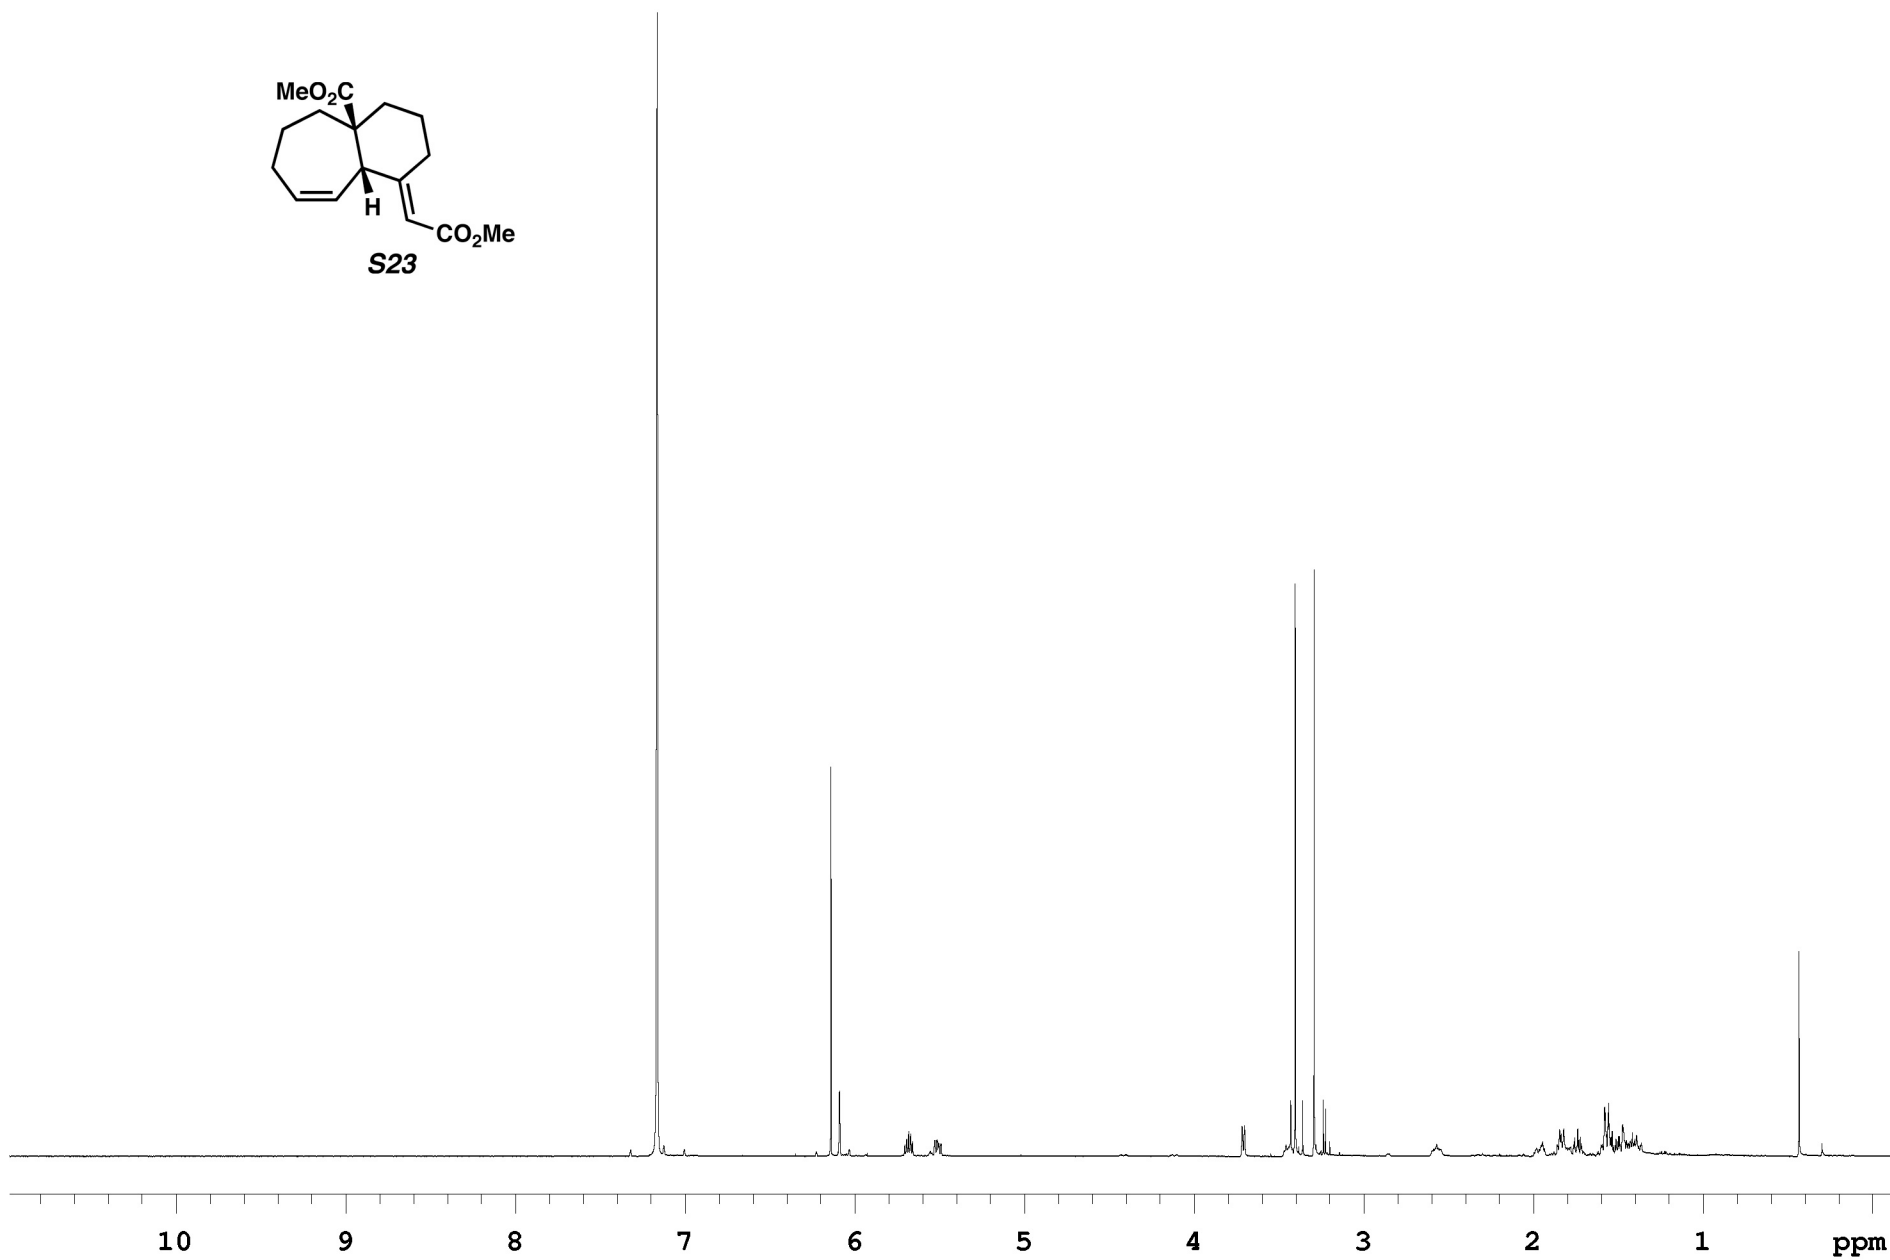

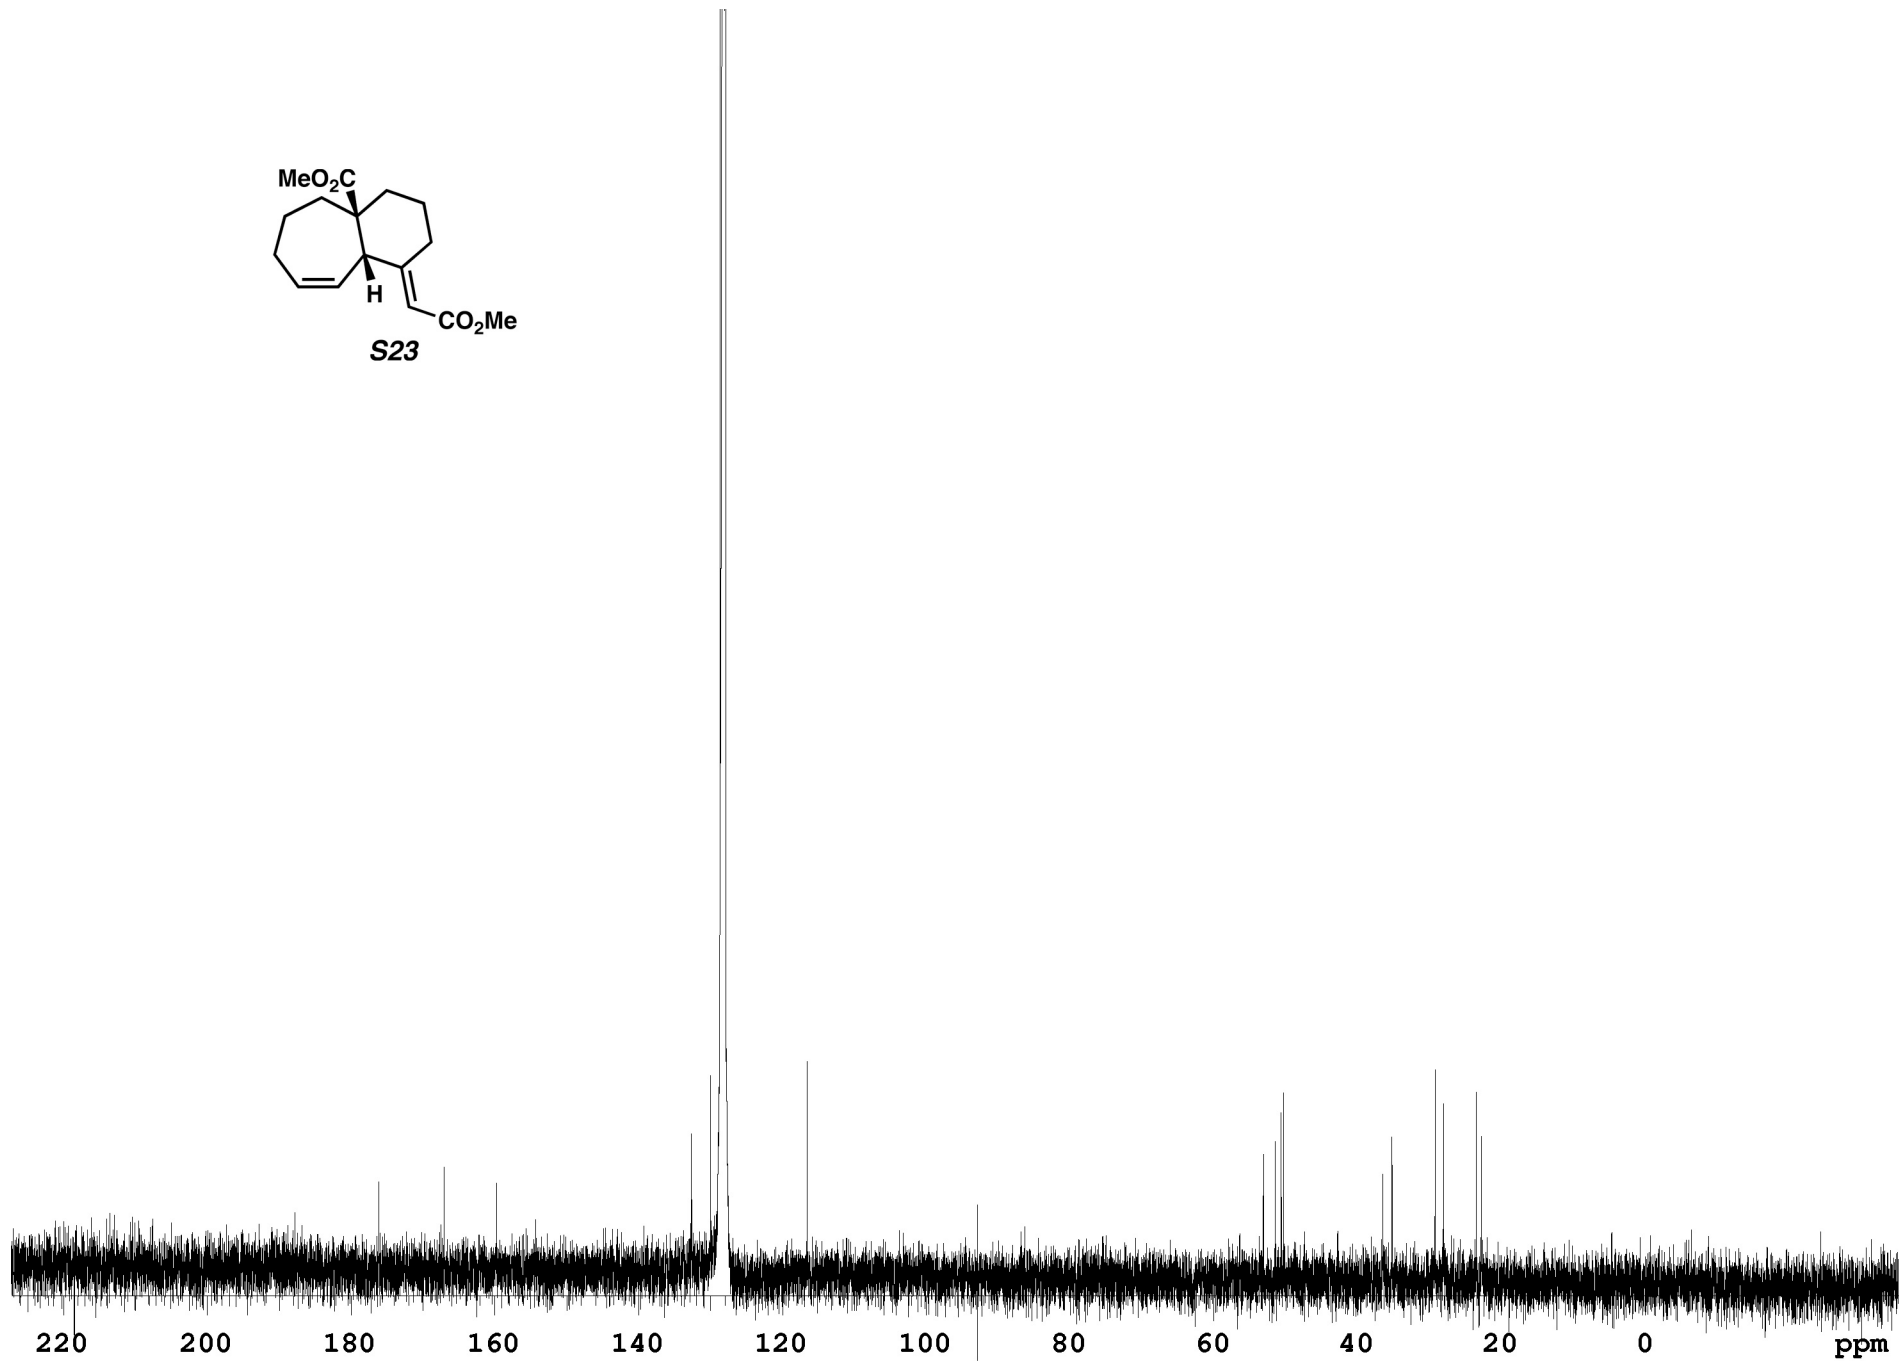

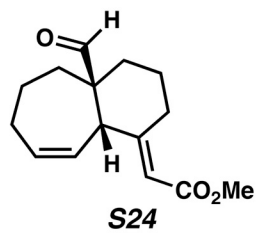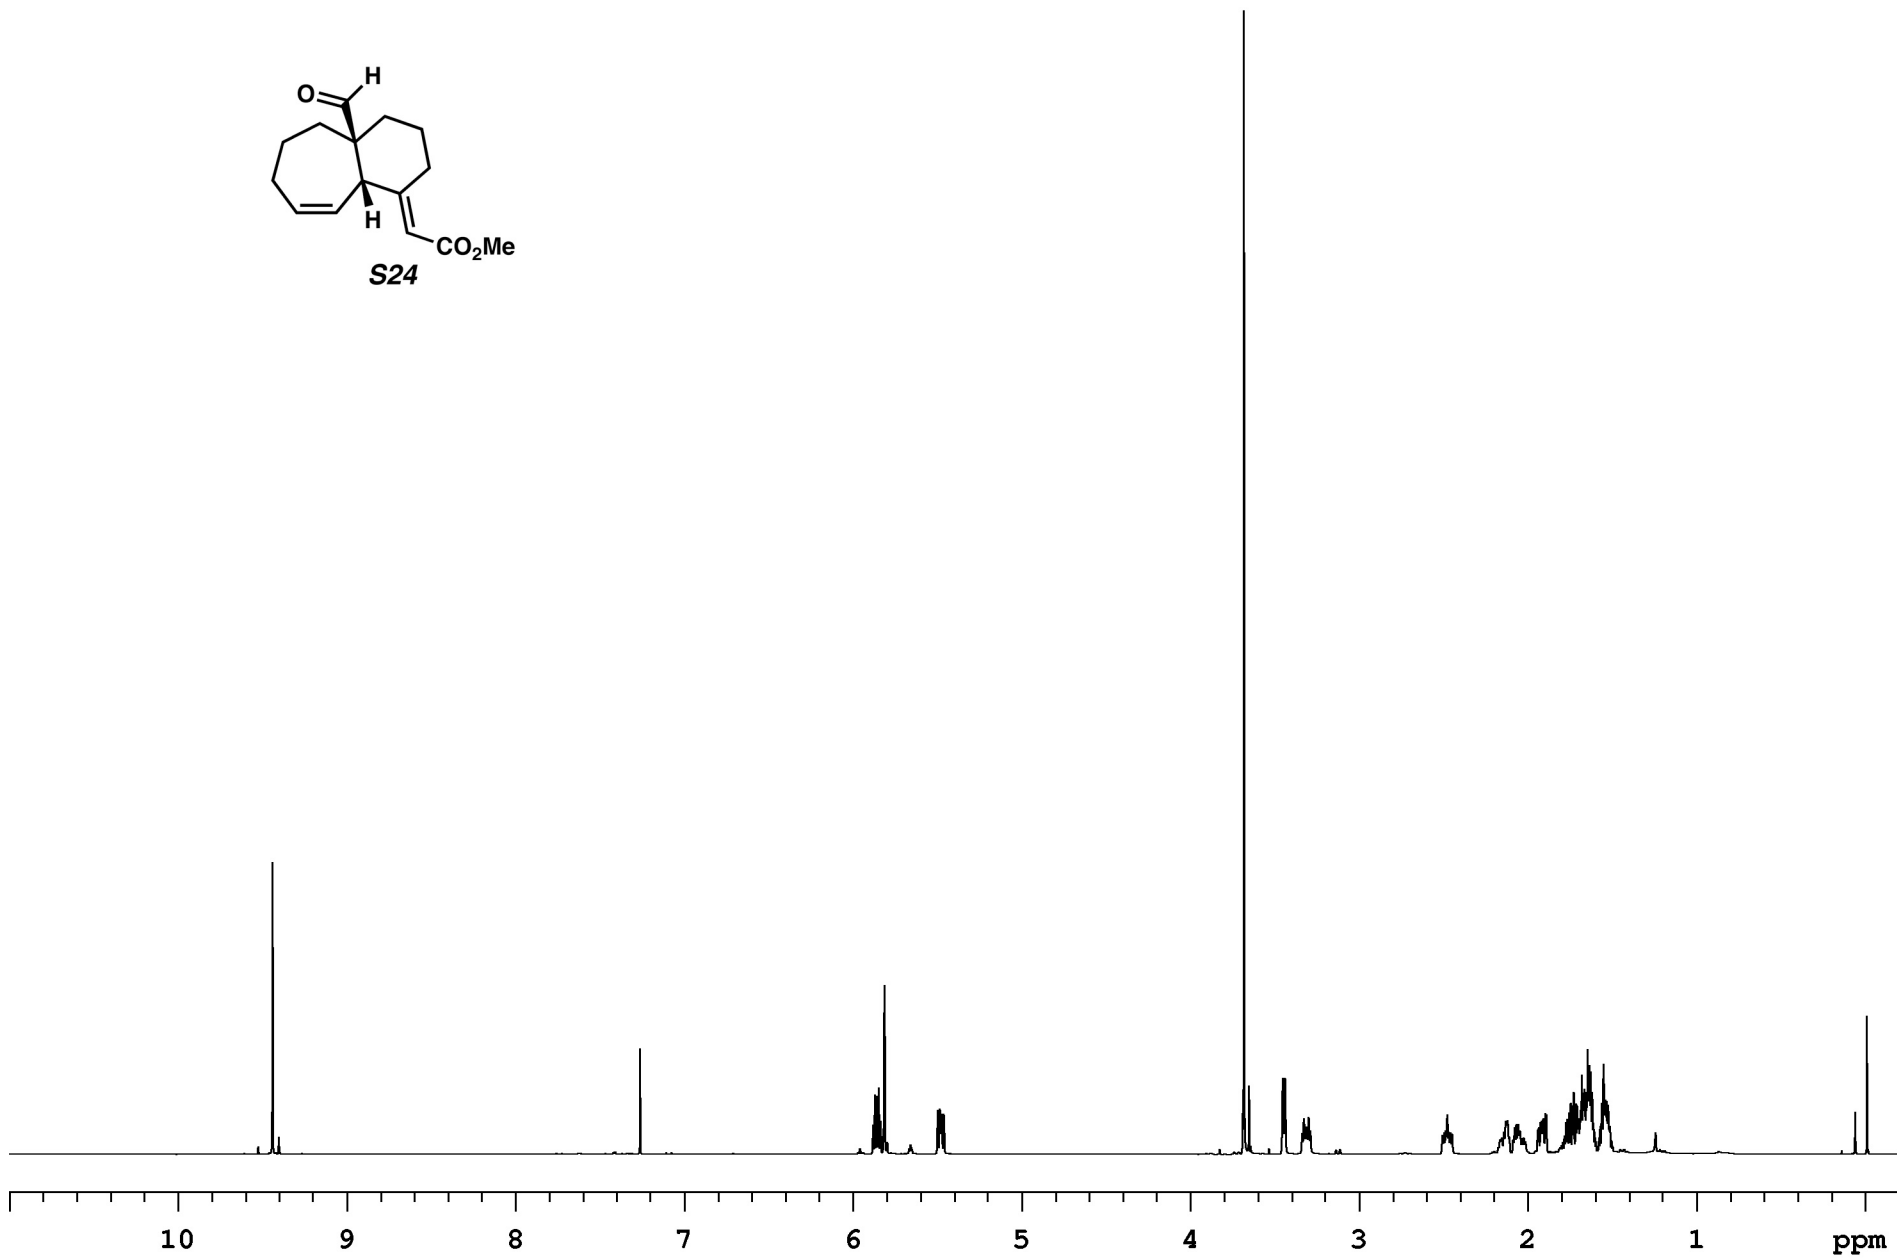

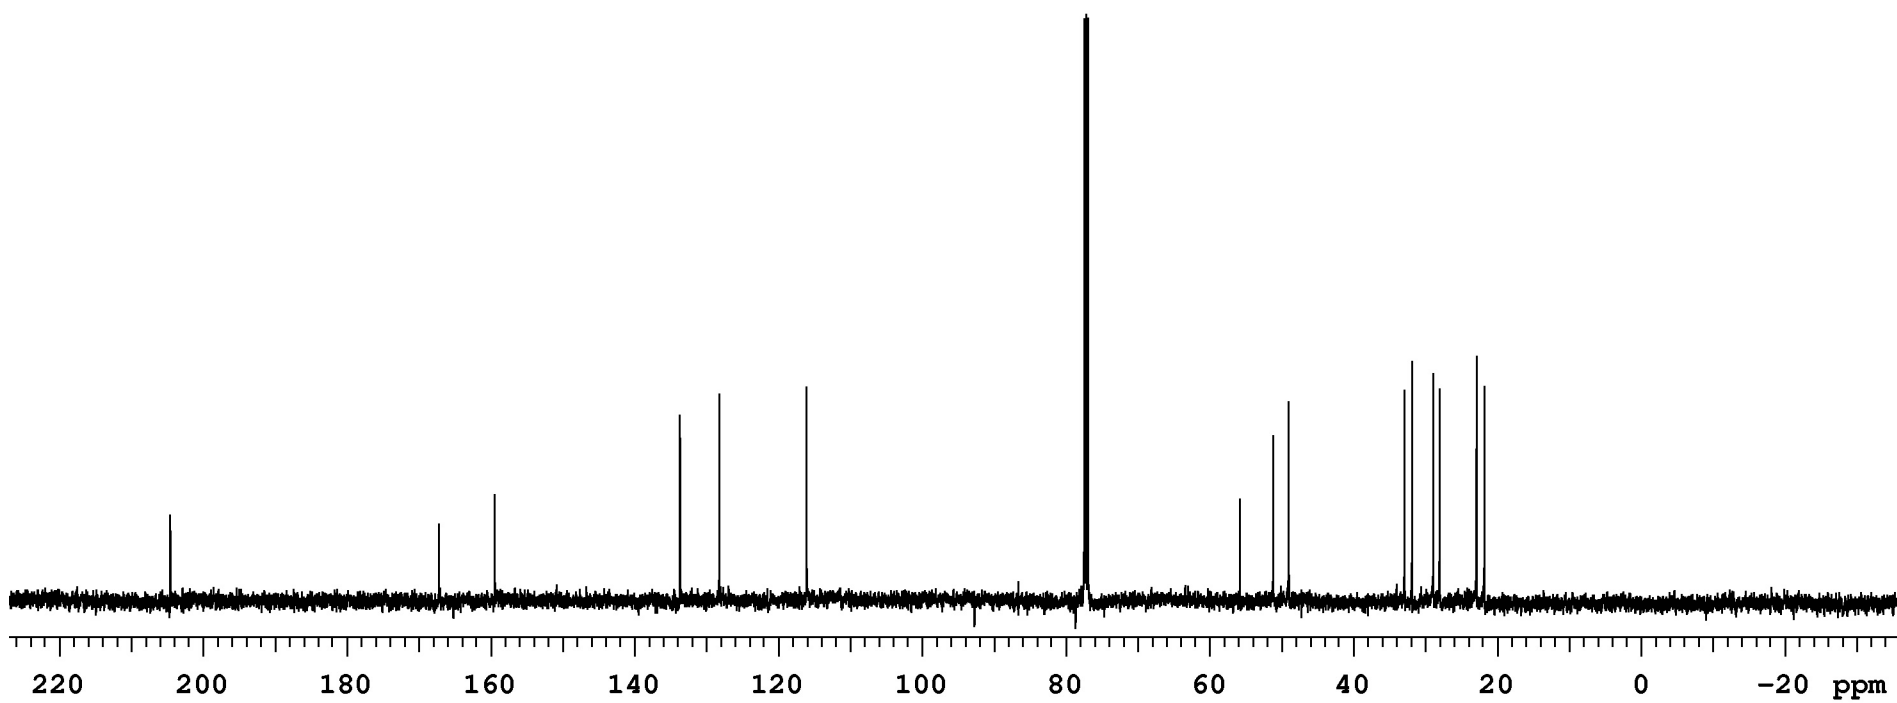



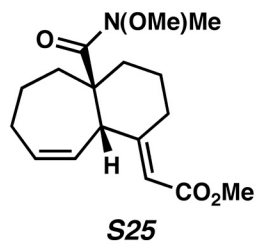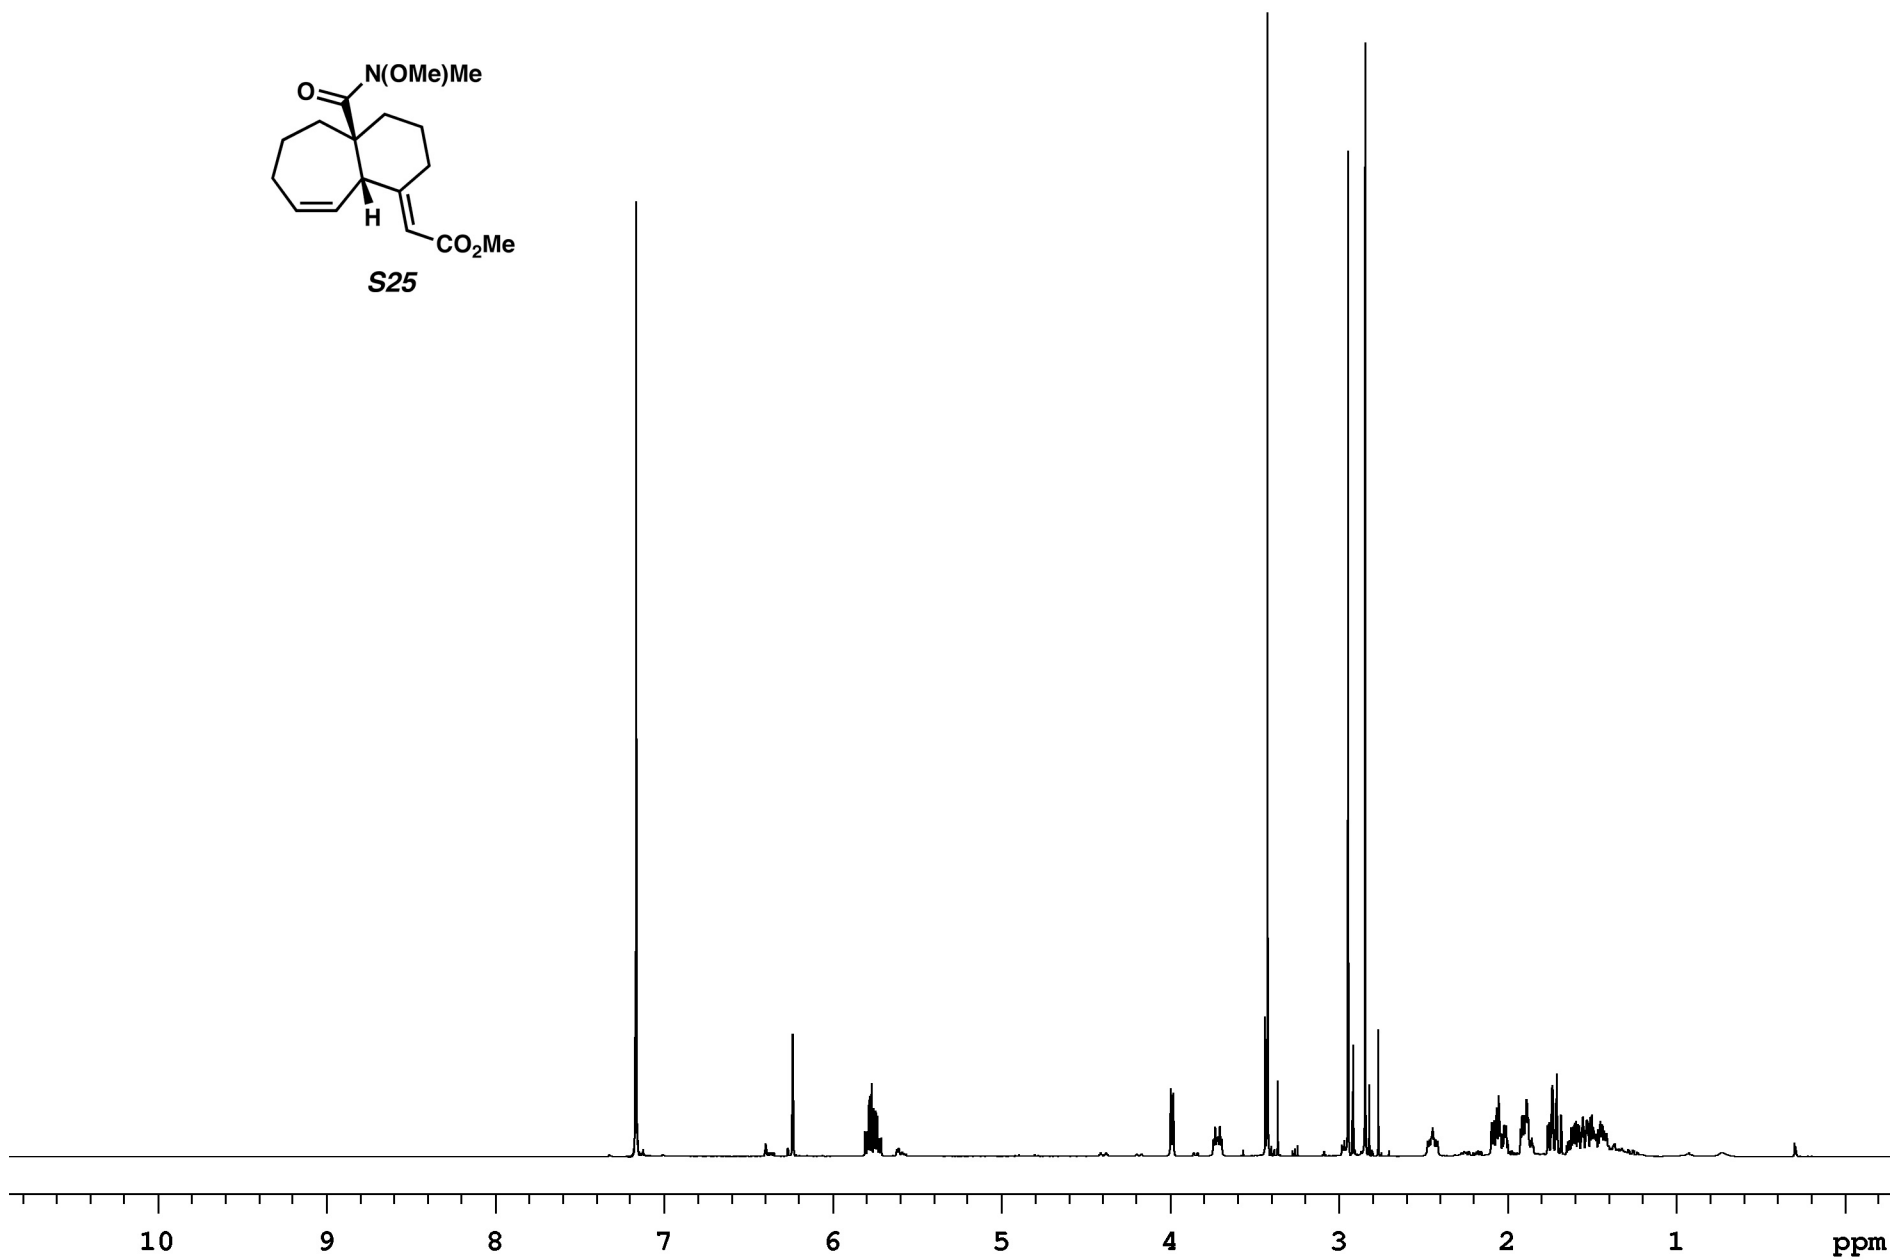

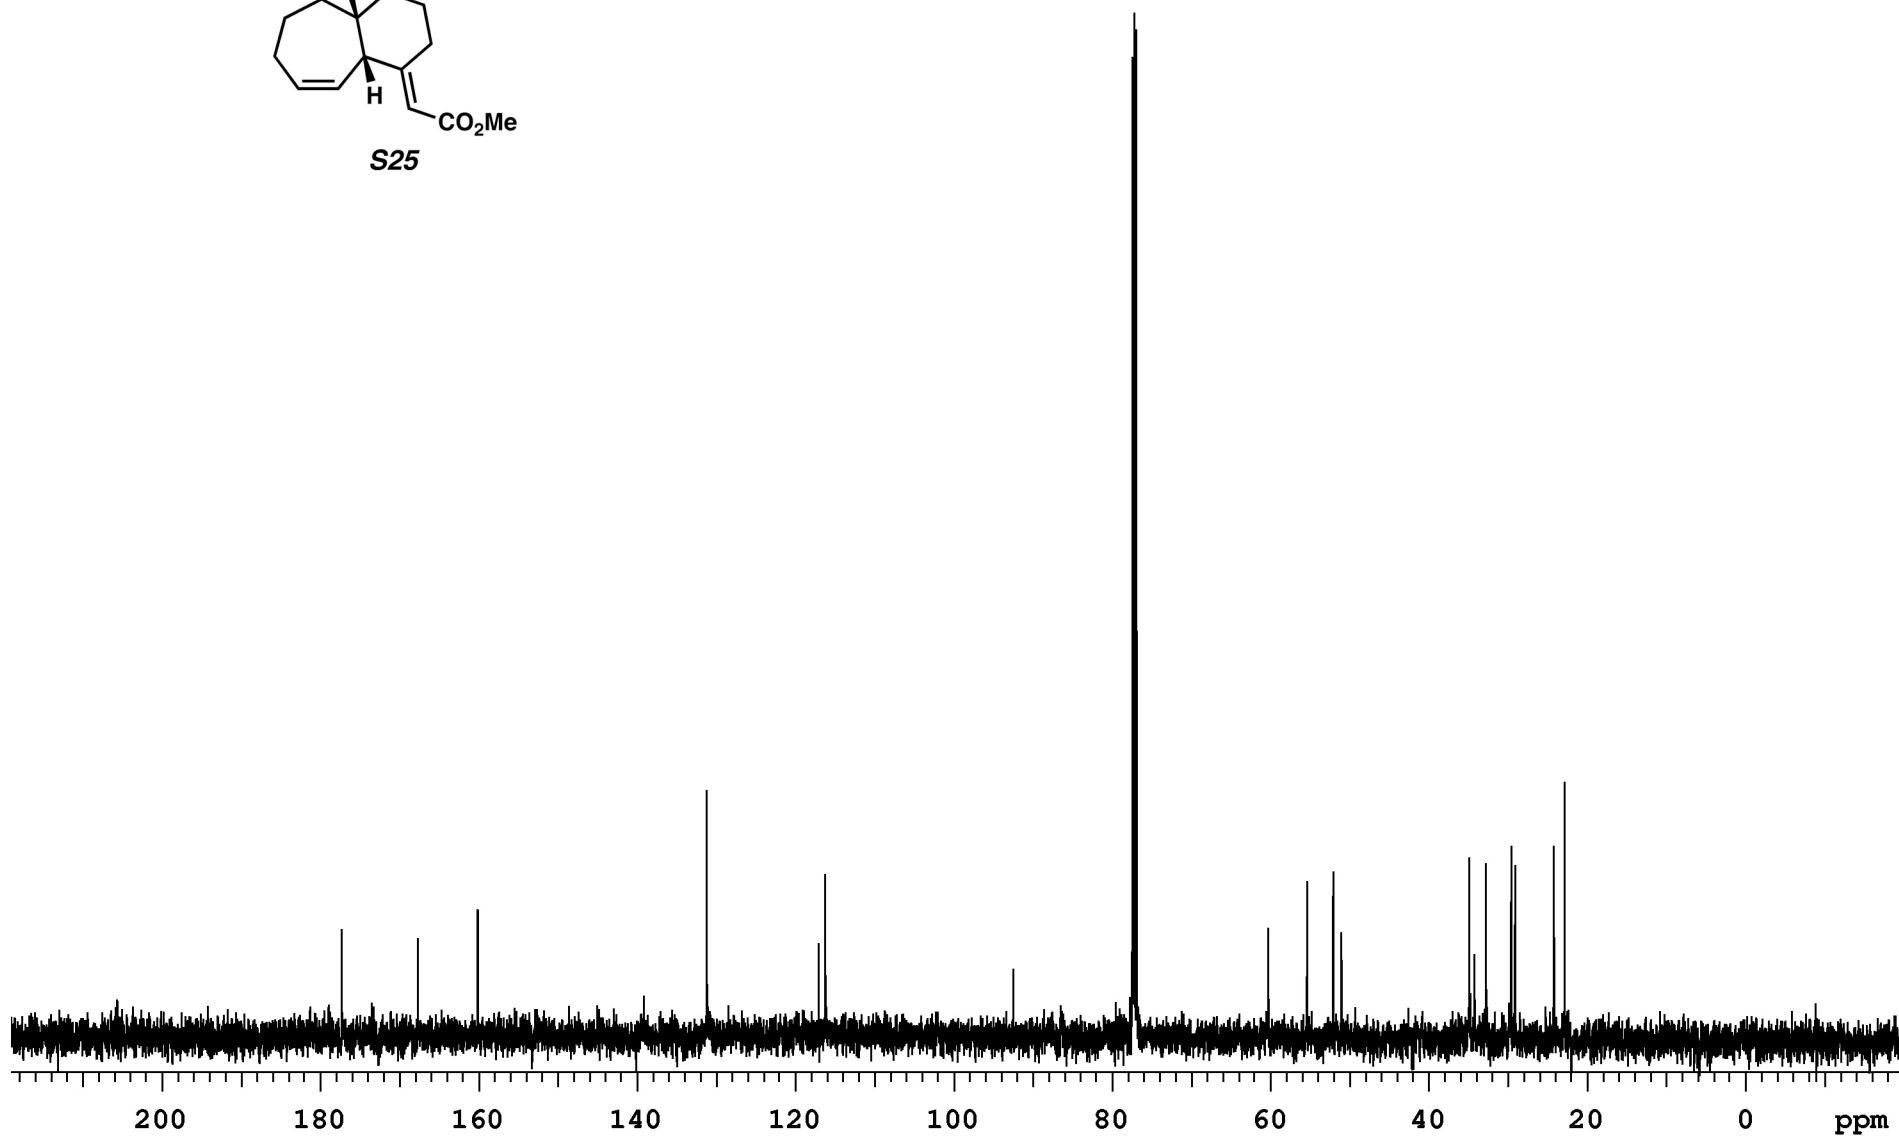

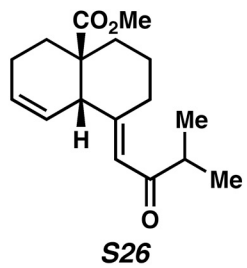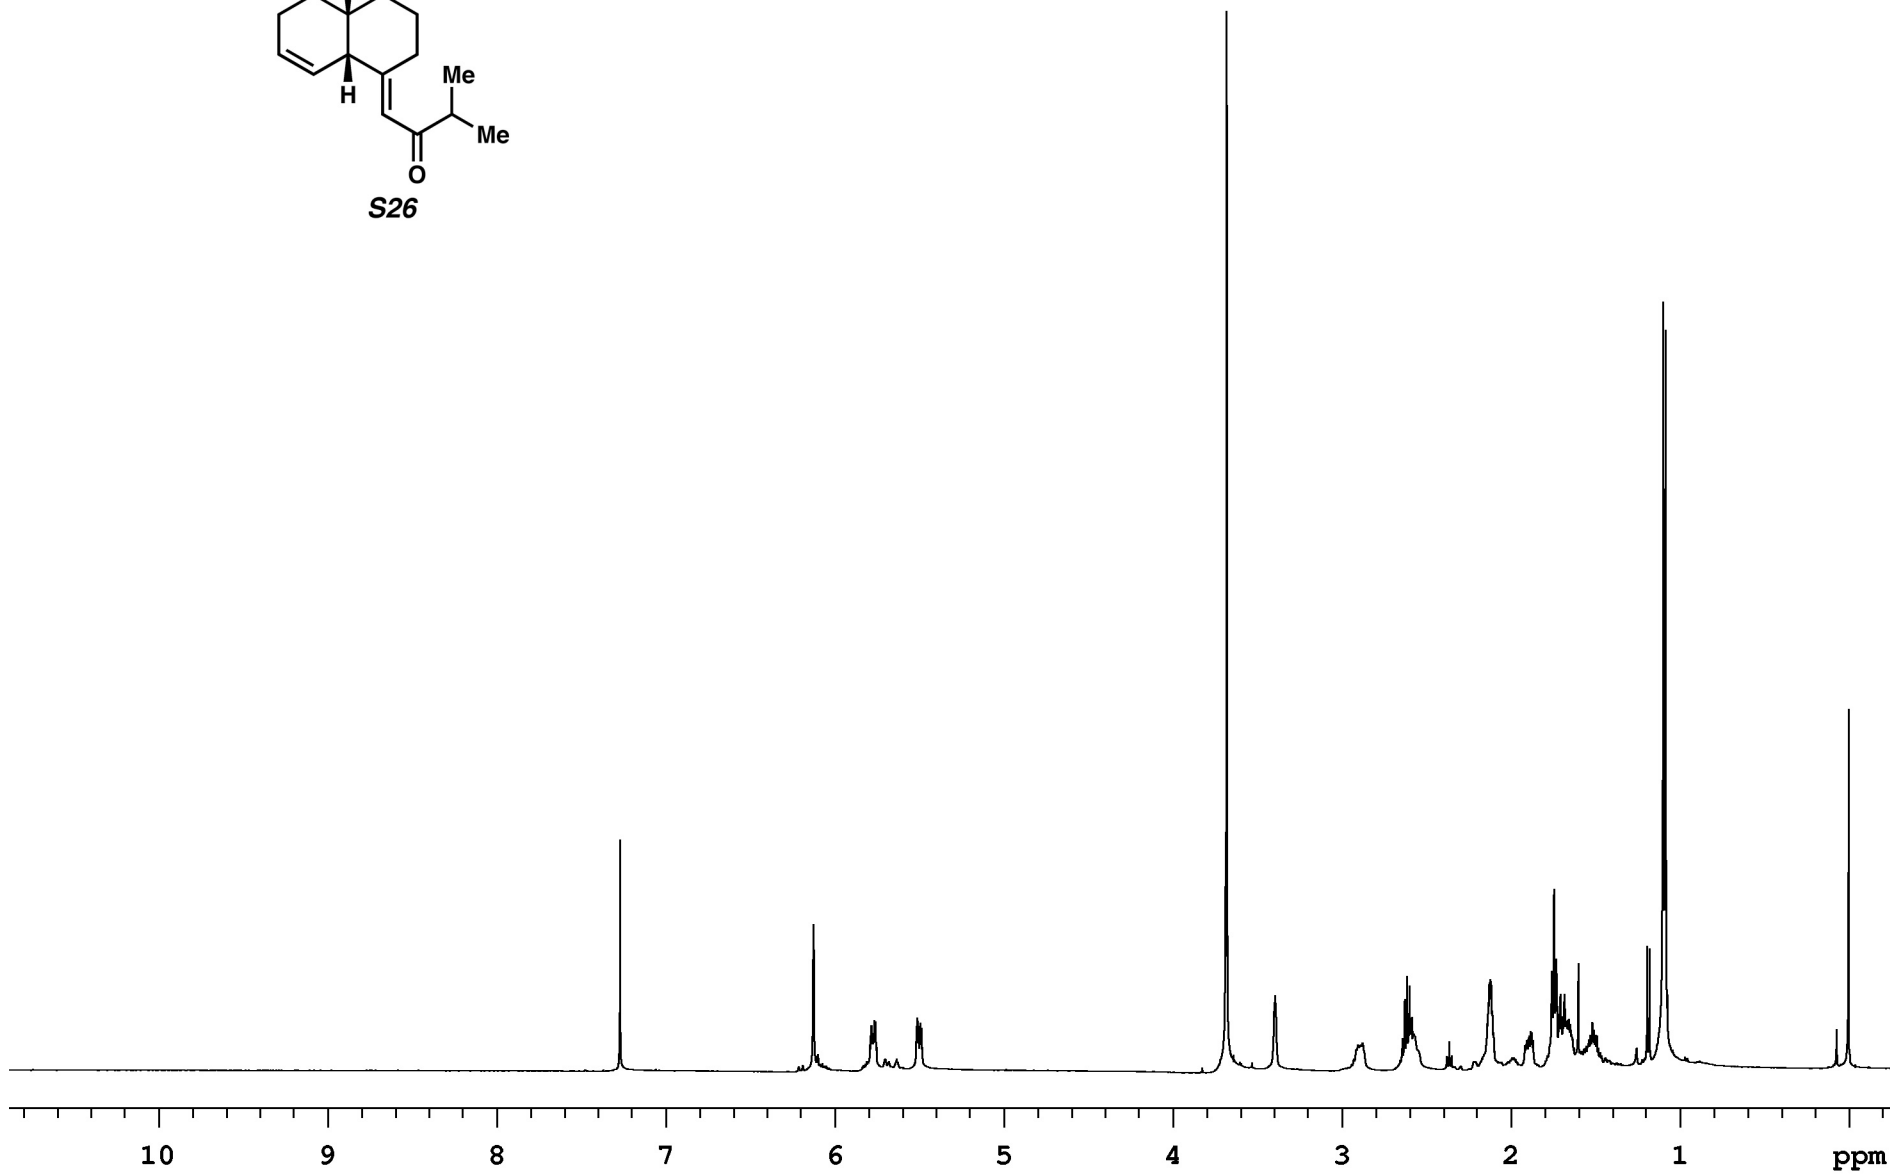

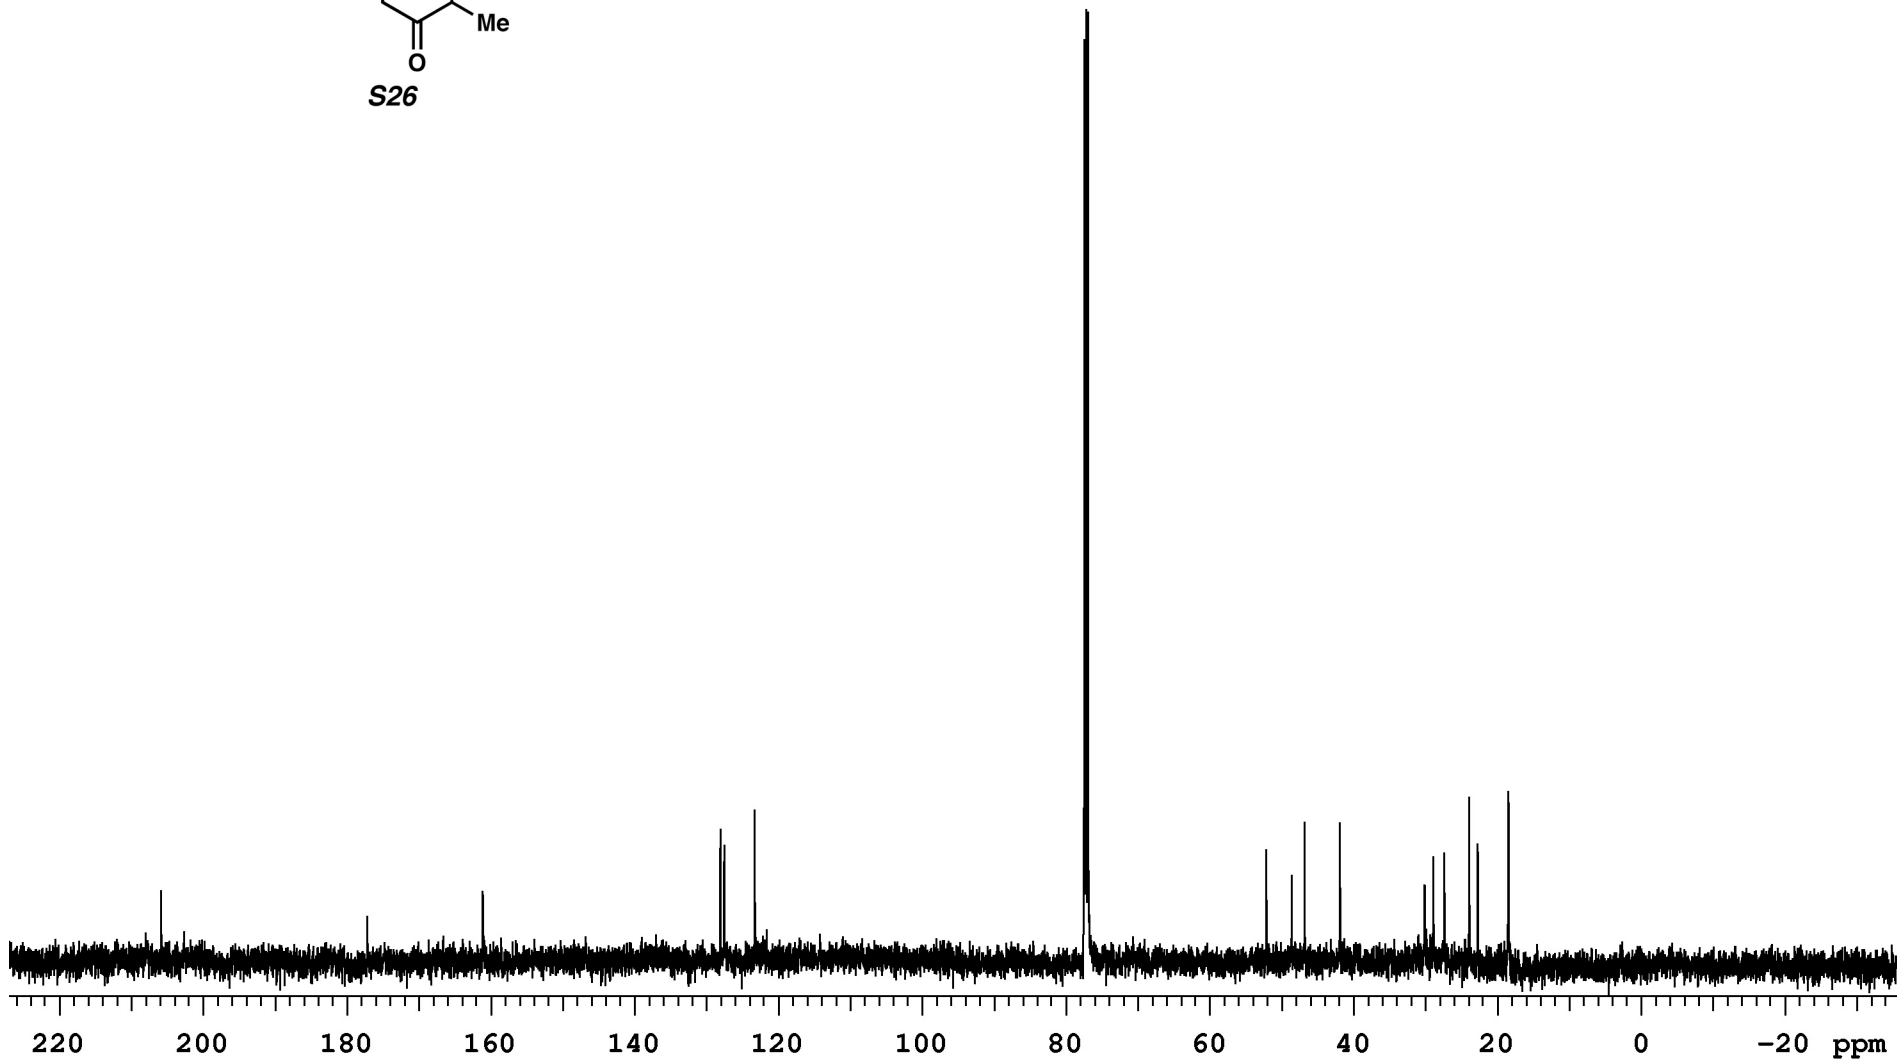

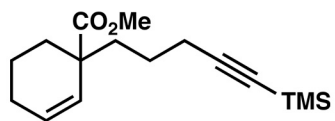

**1**

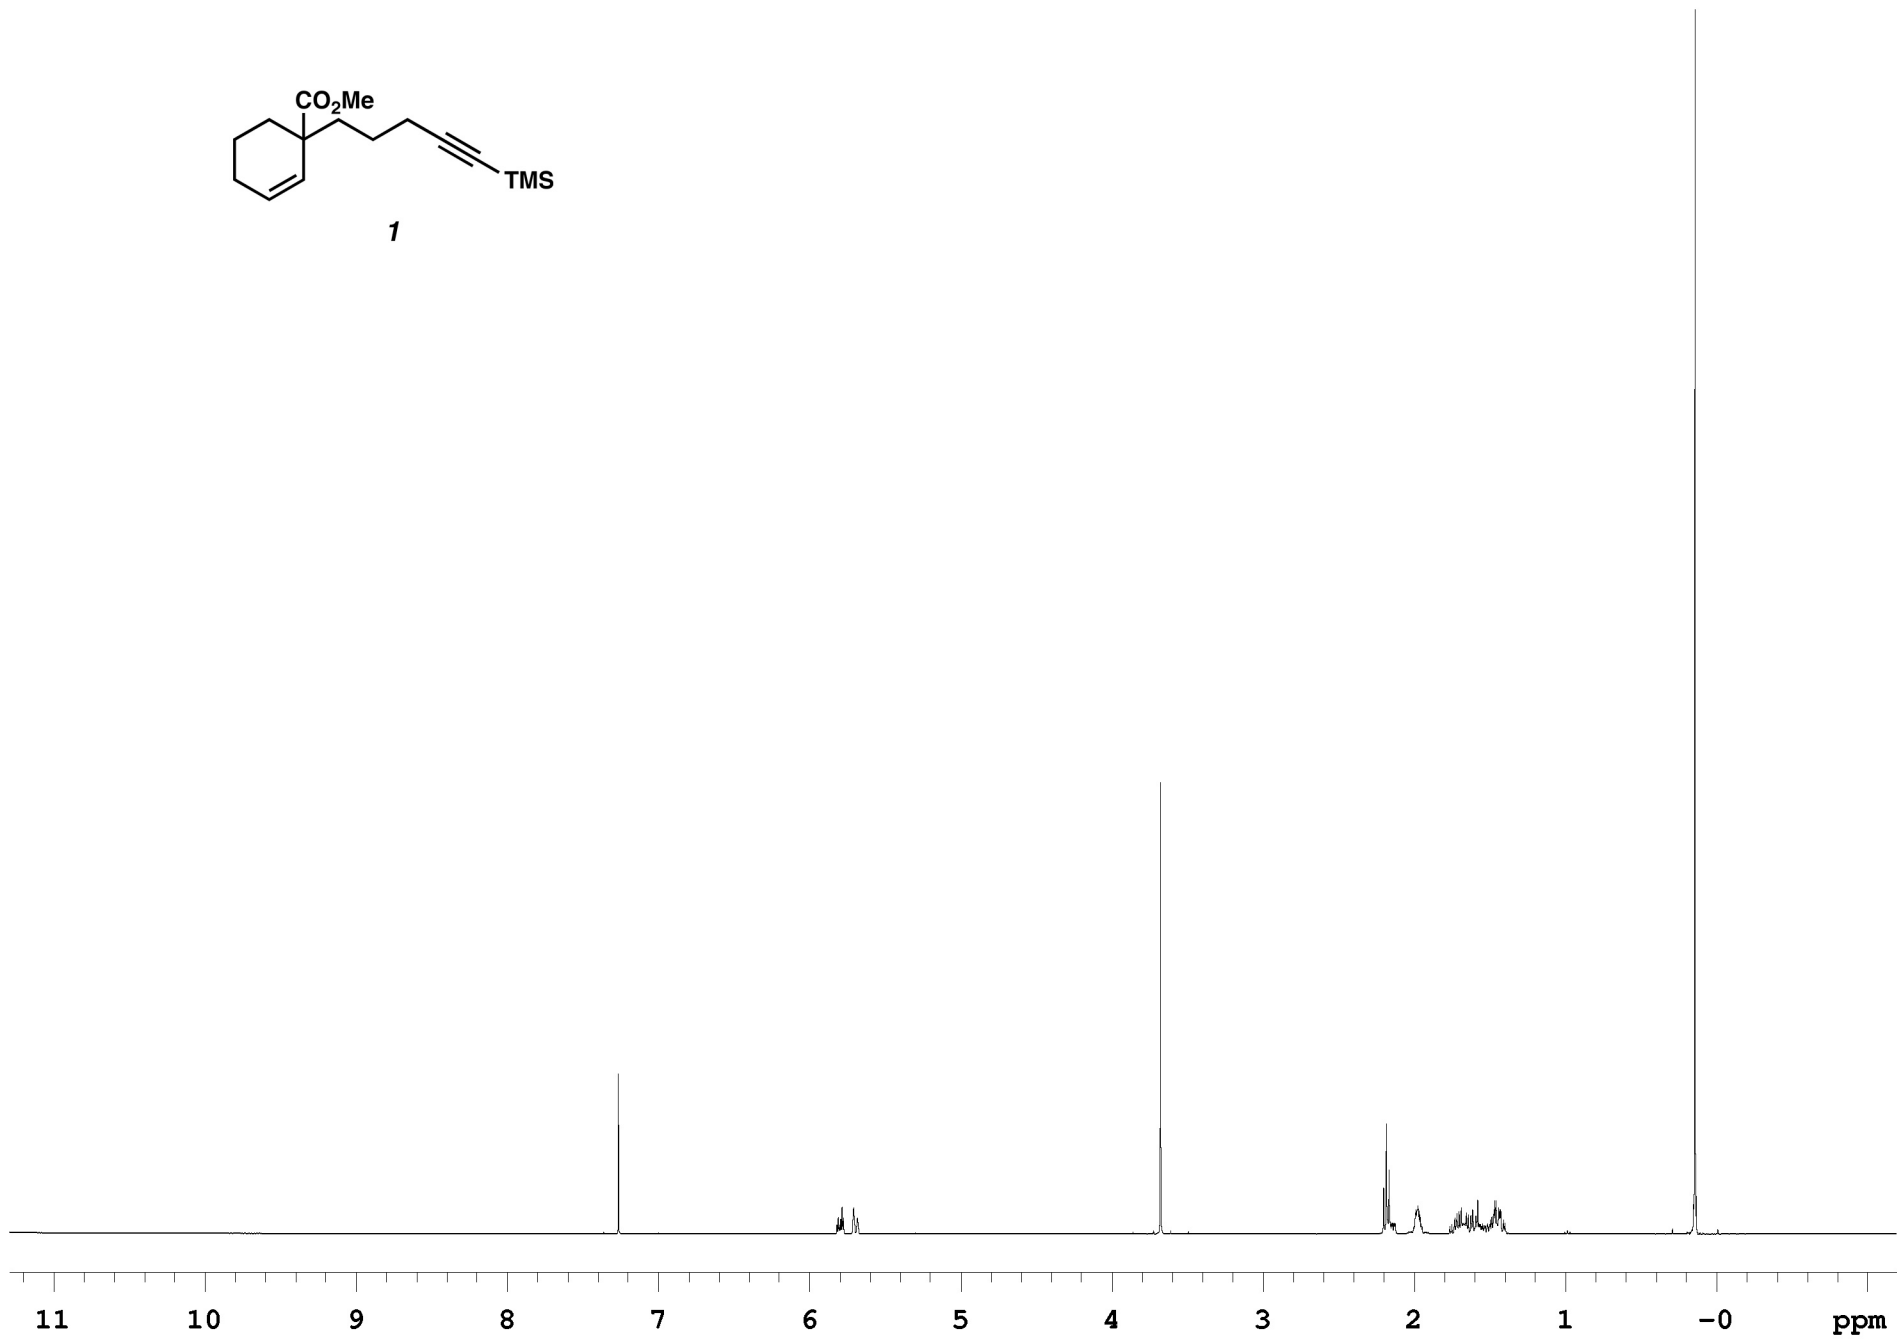

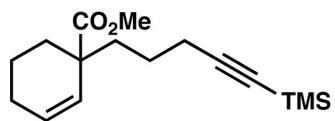

**1**

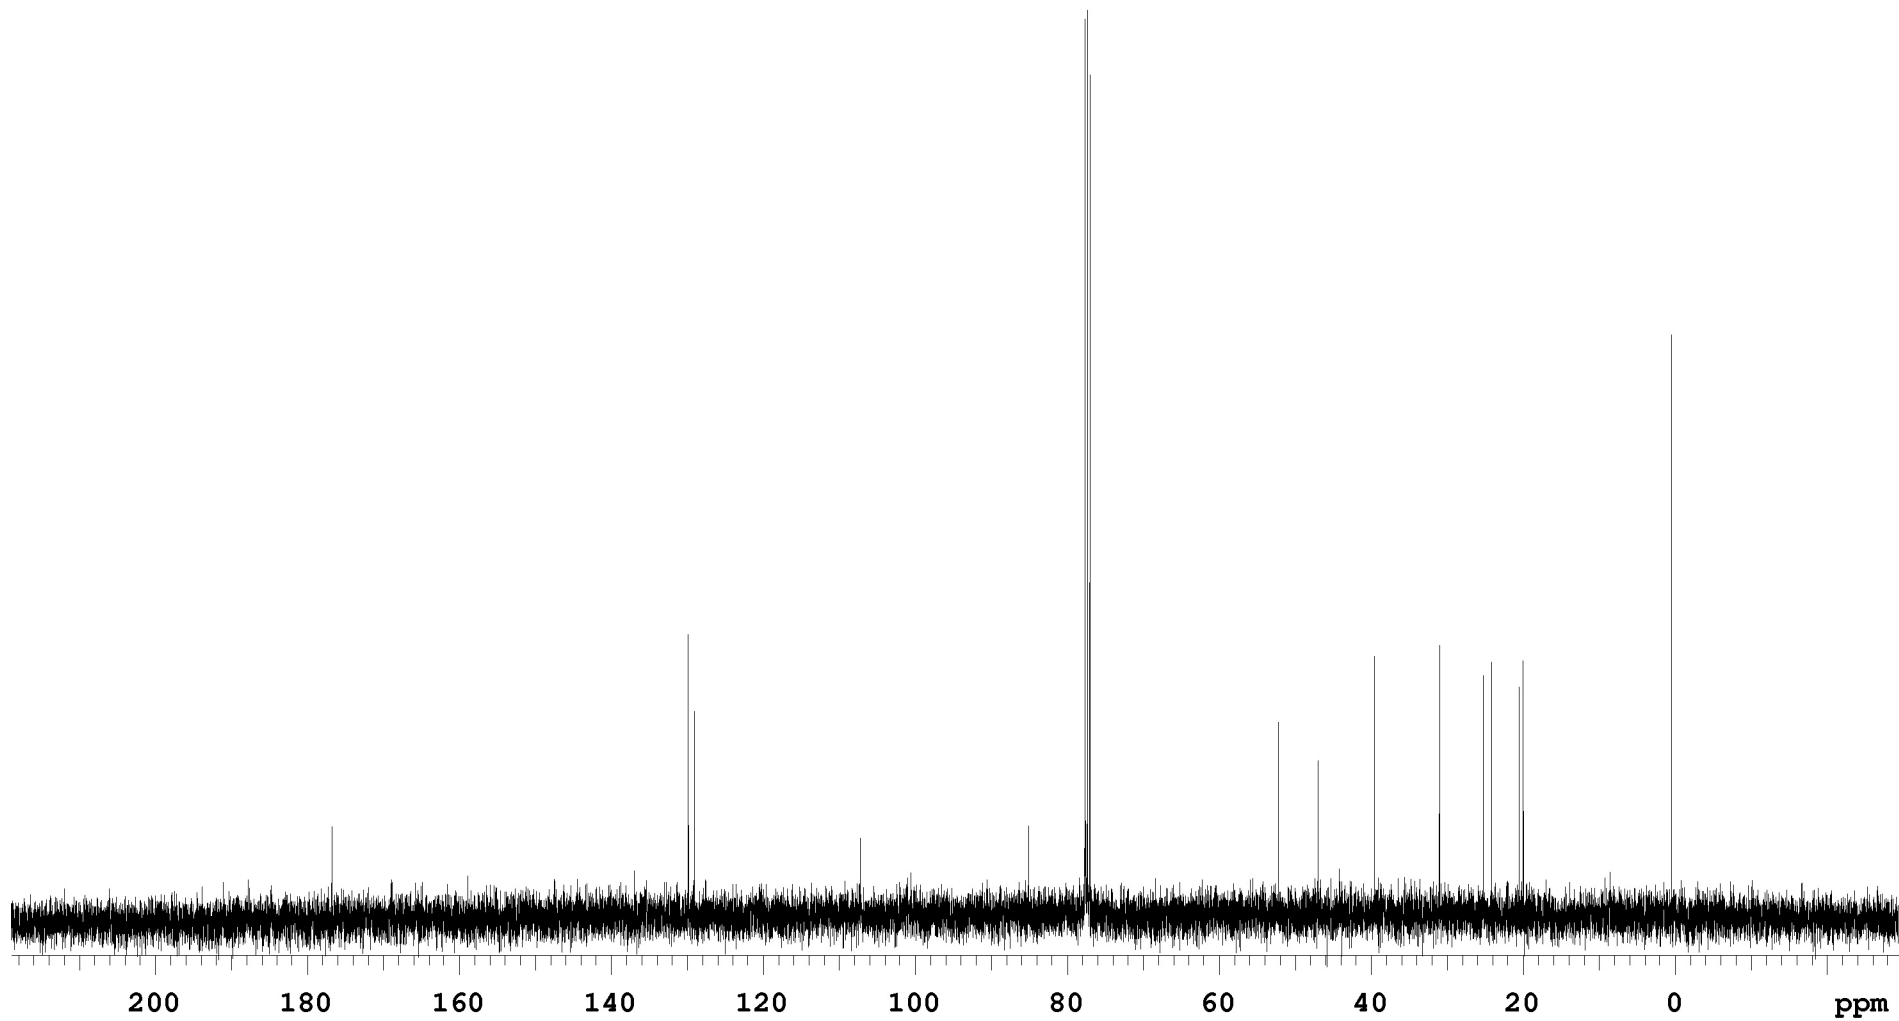

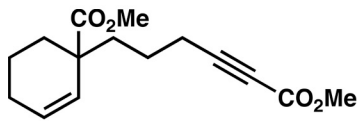

3

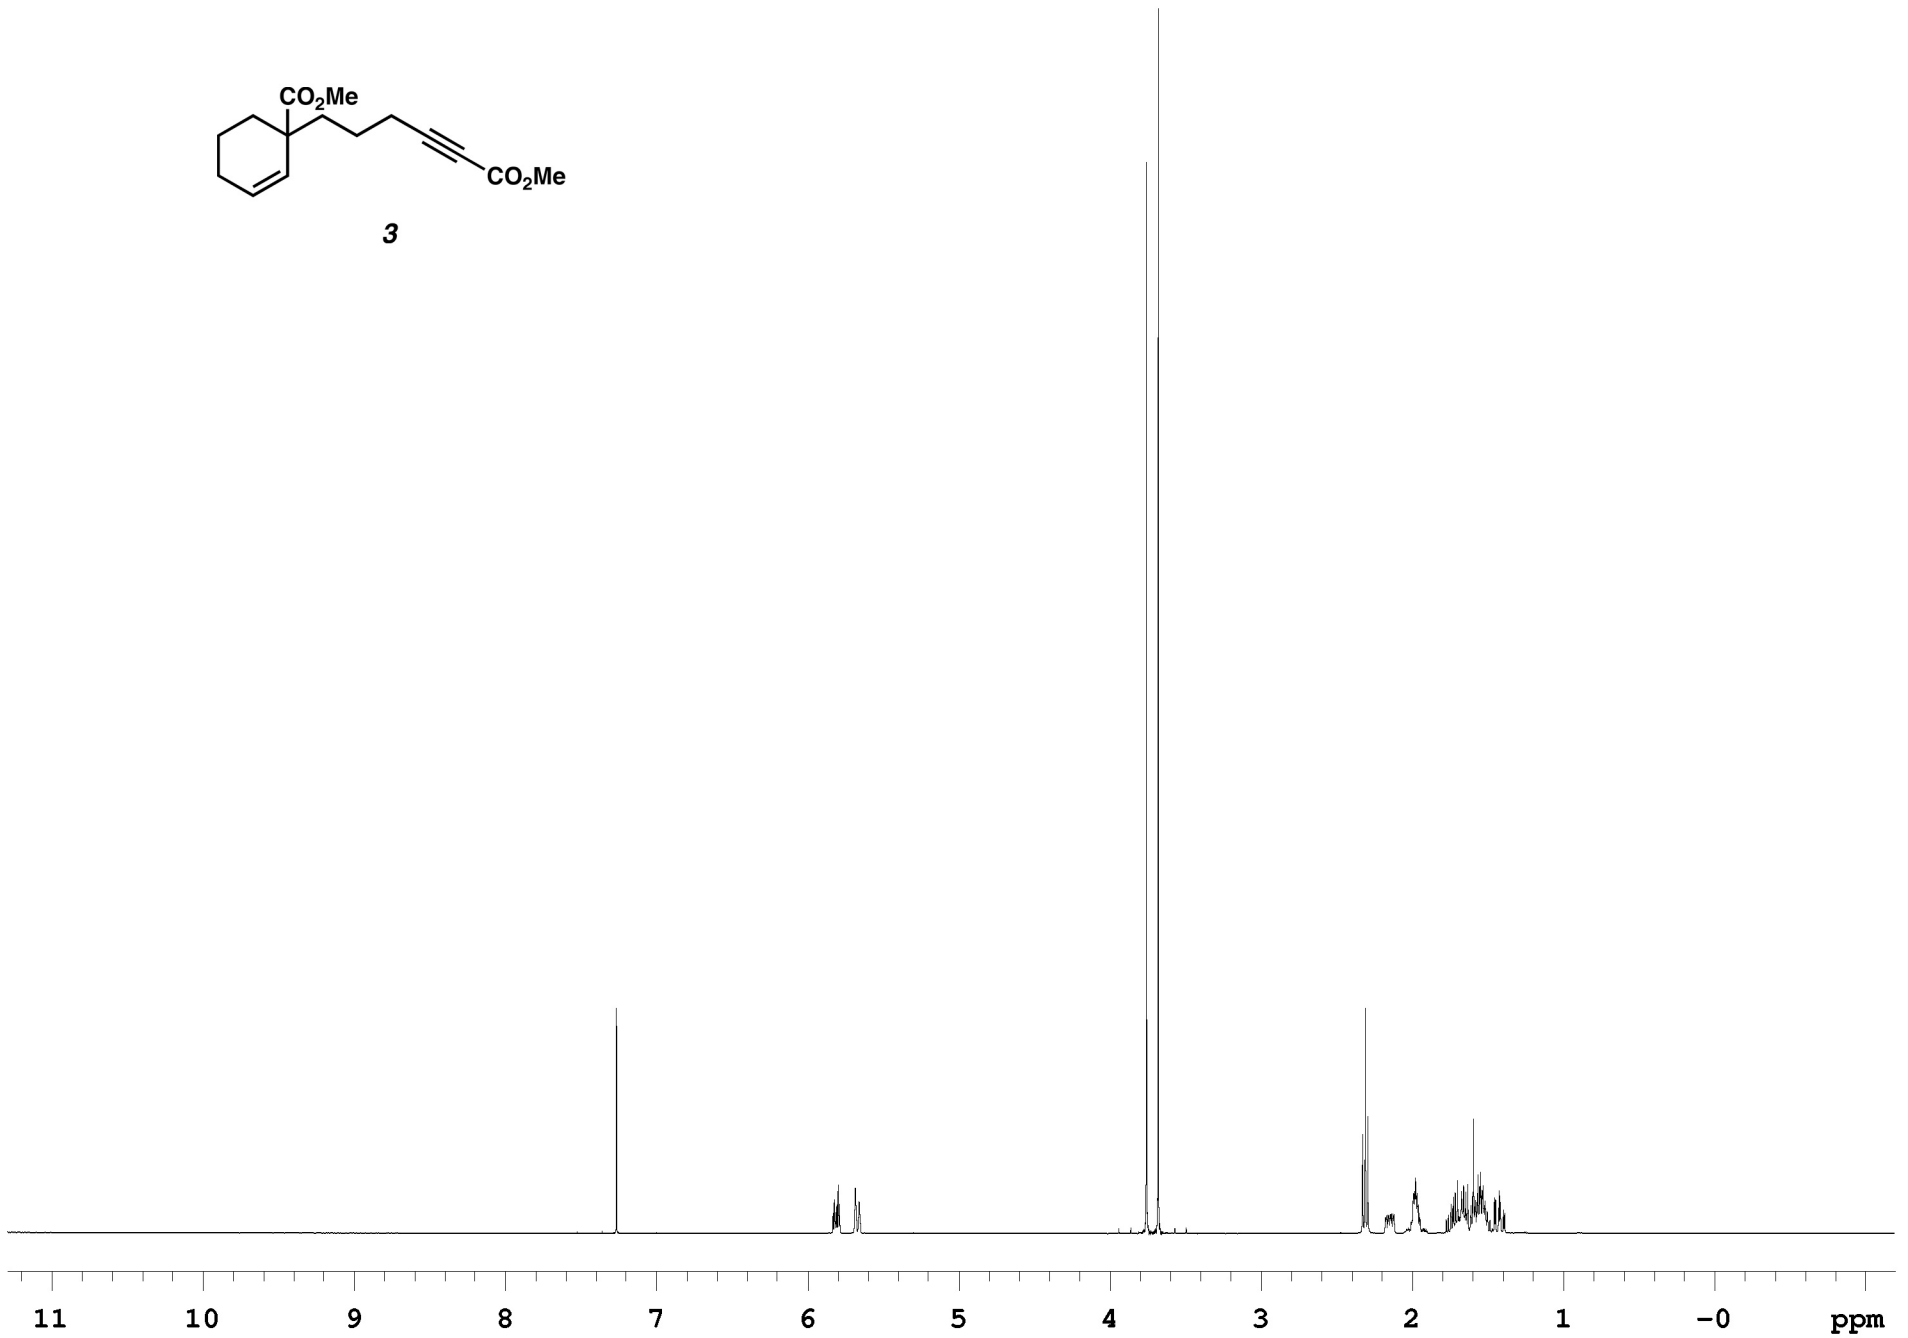

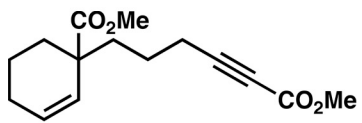

3

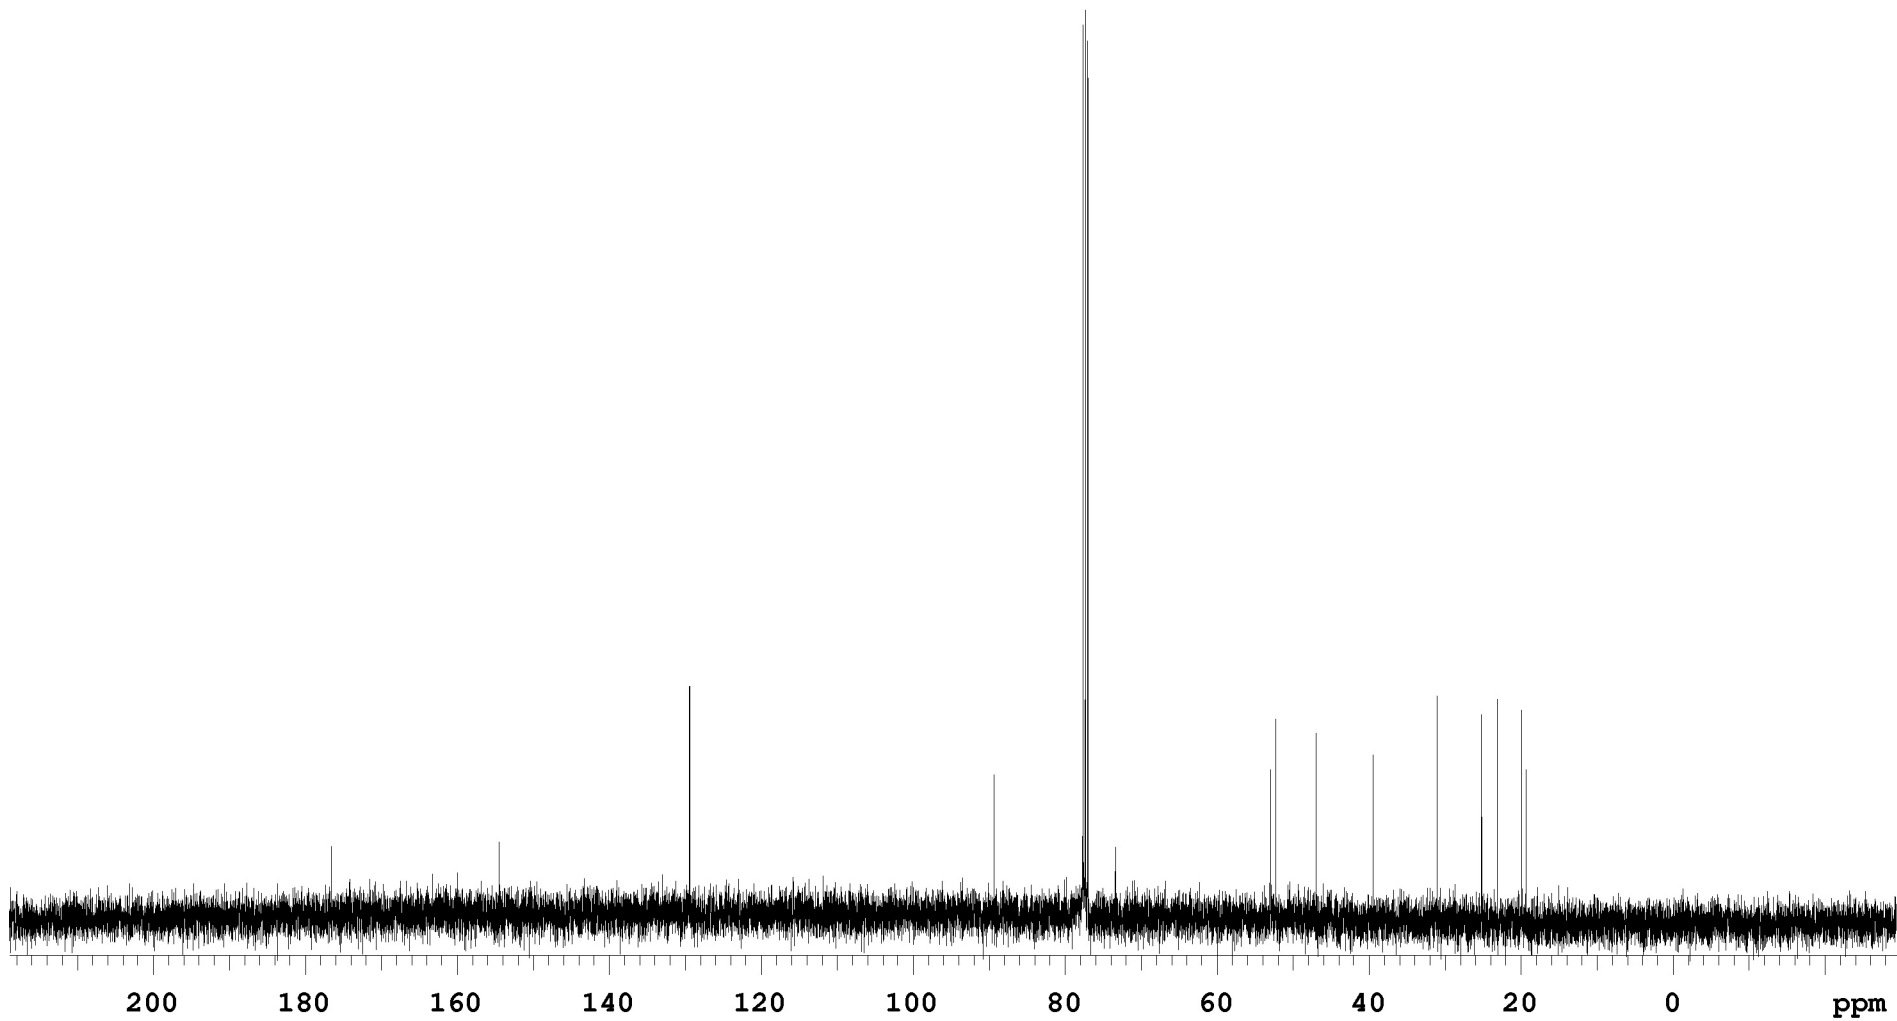





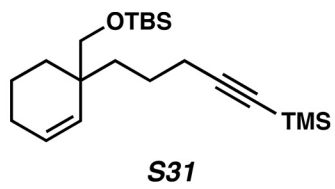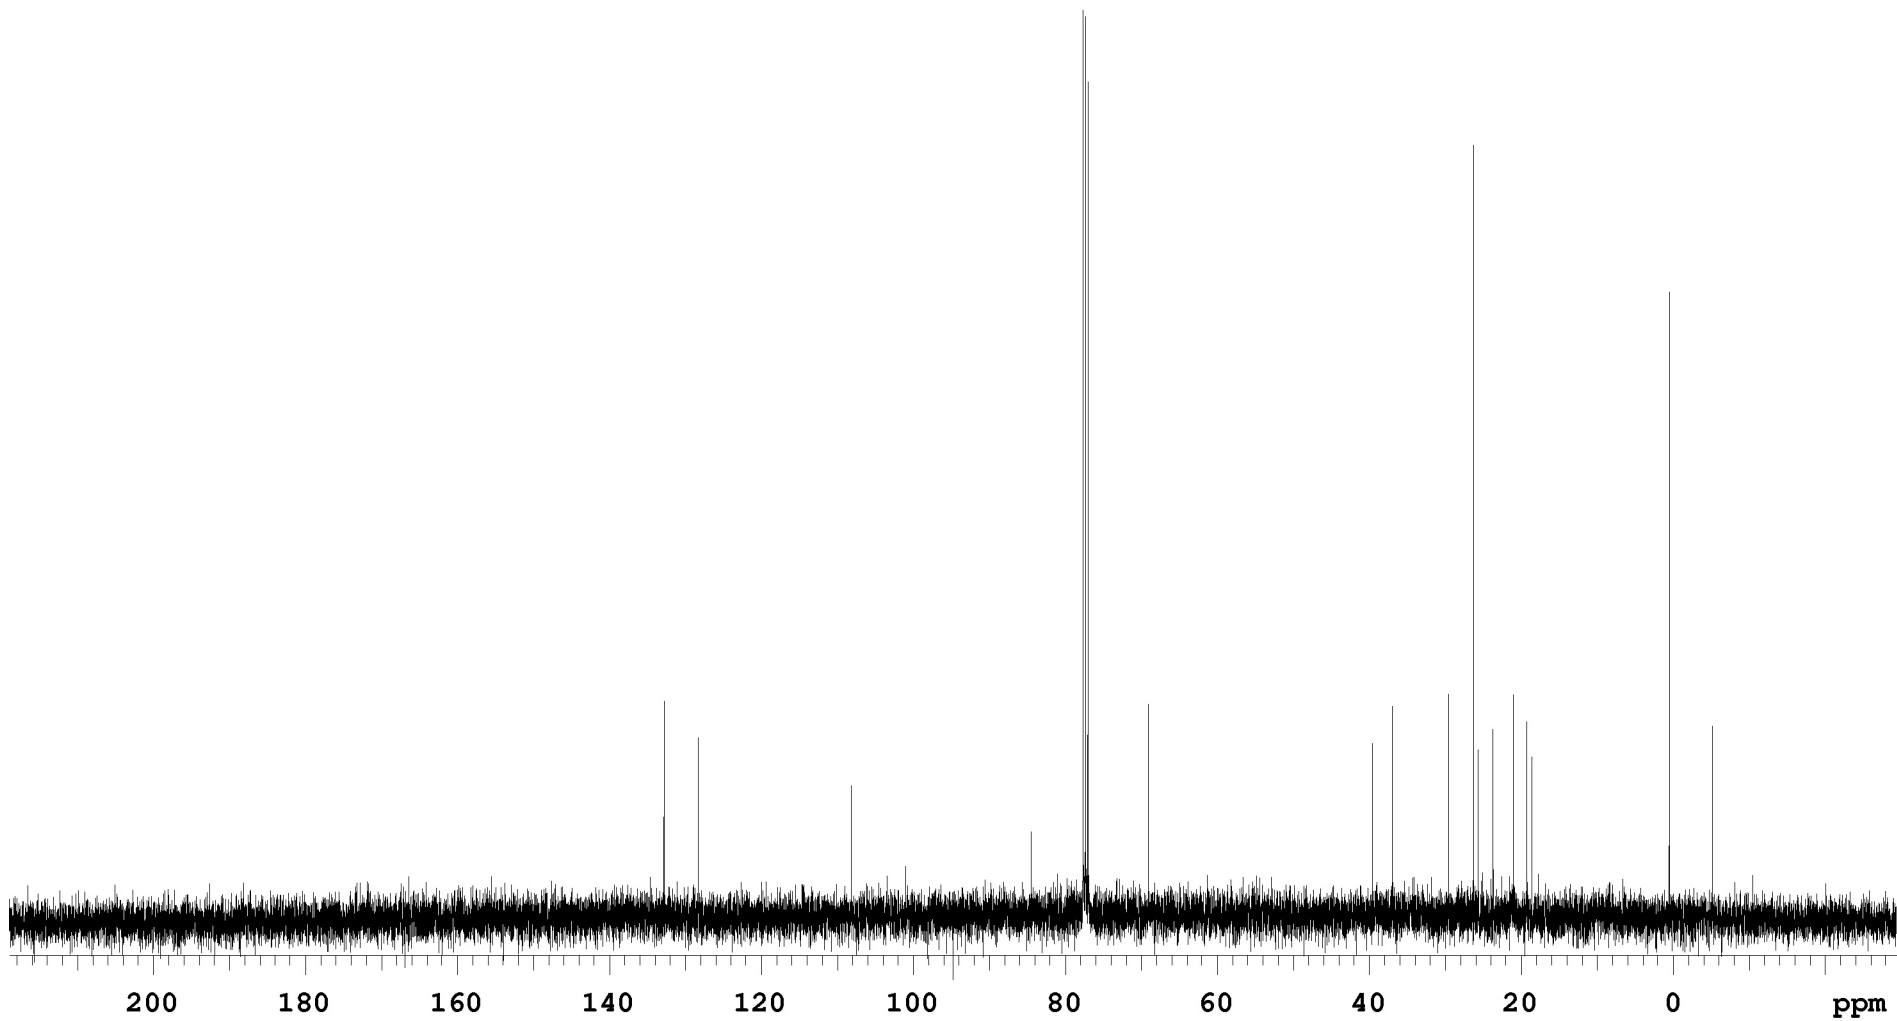

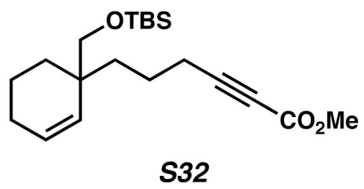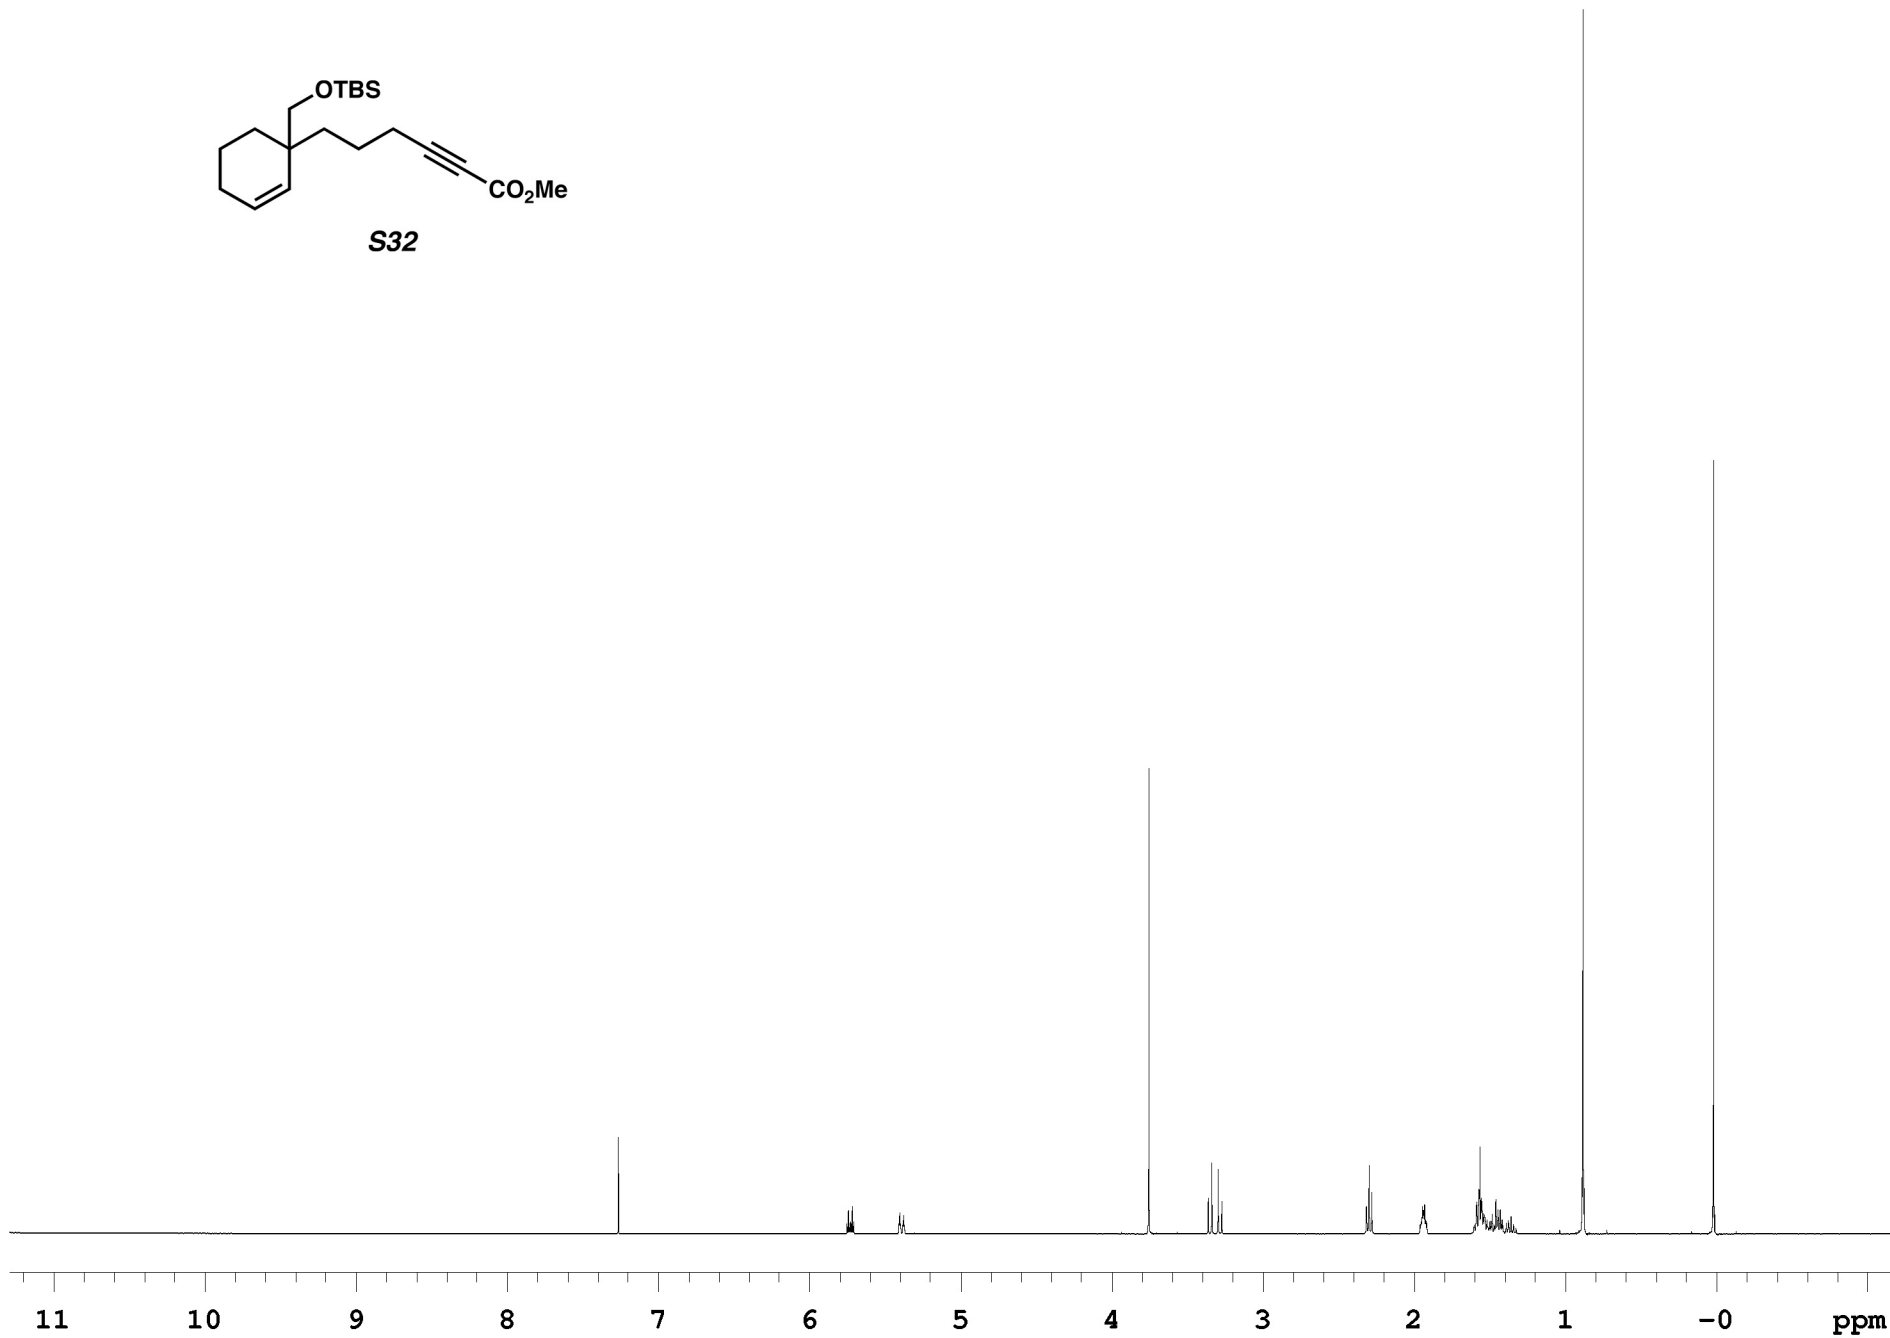

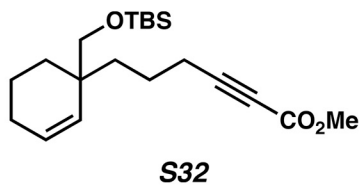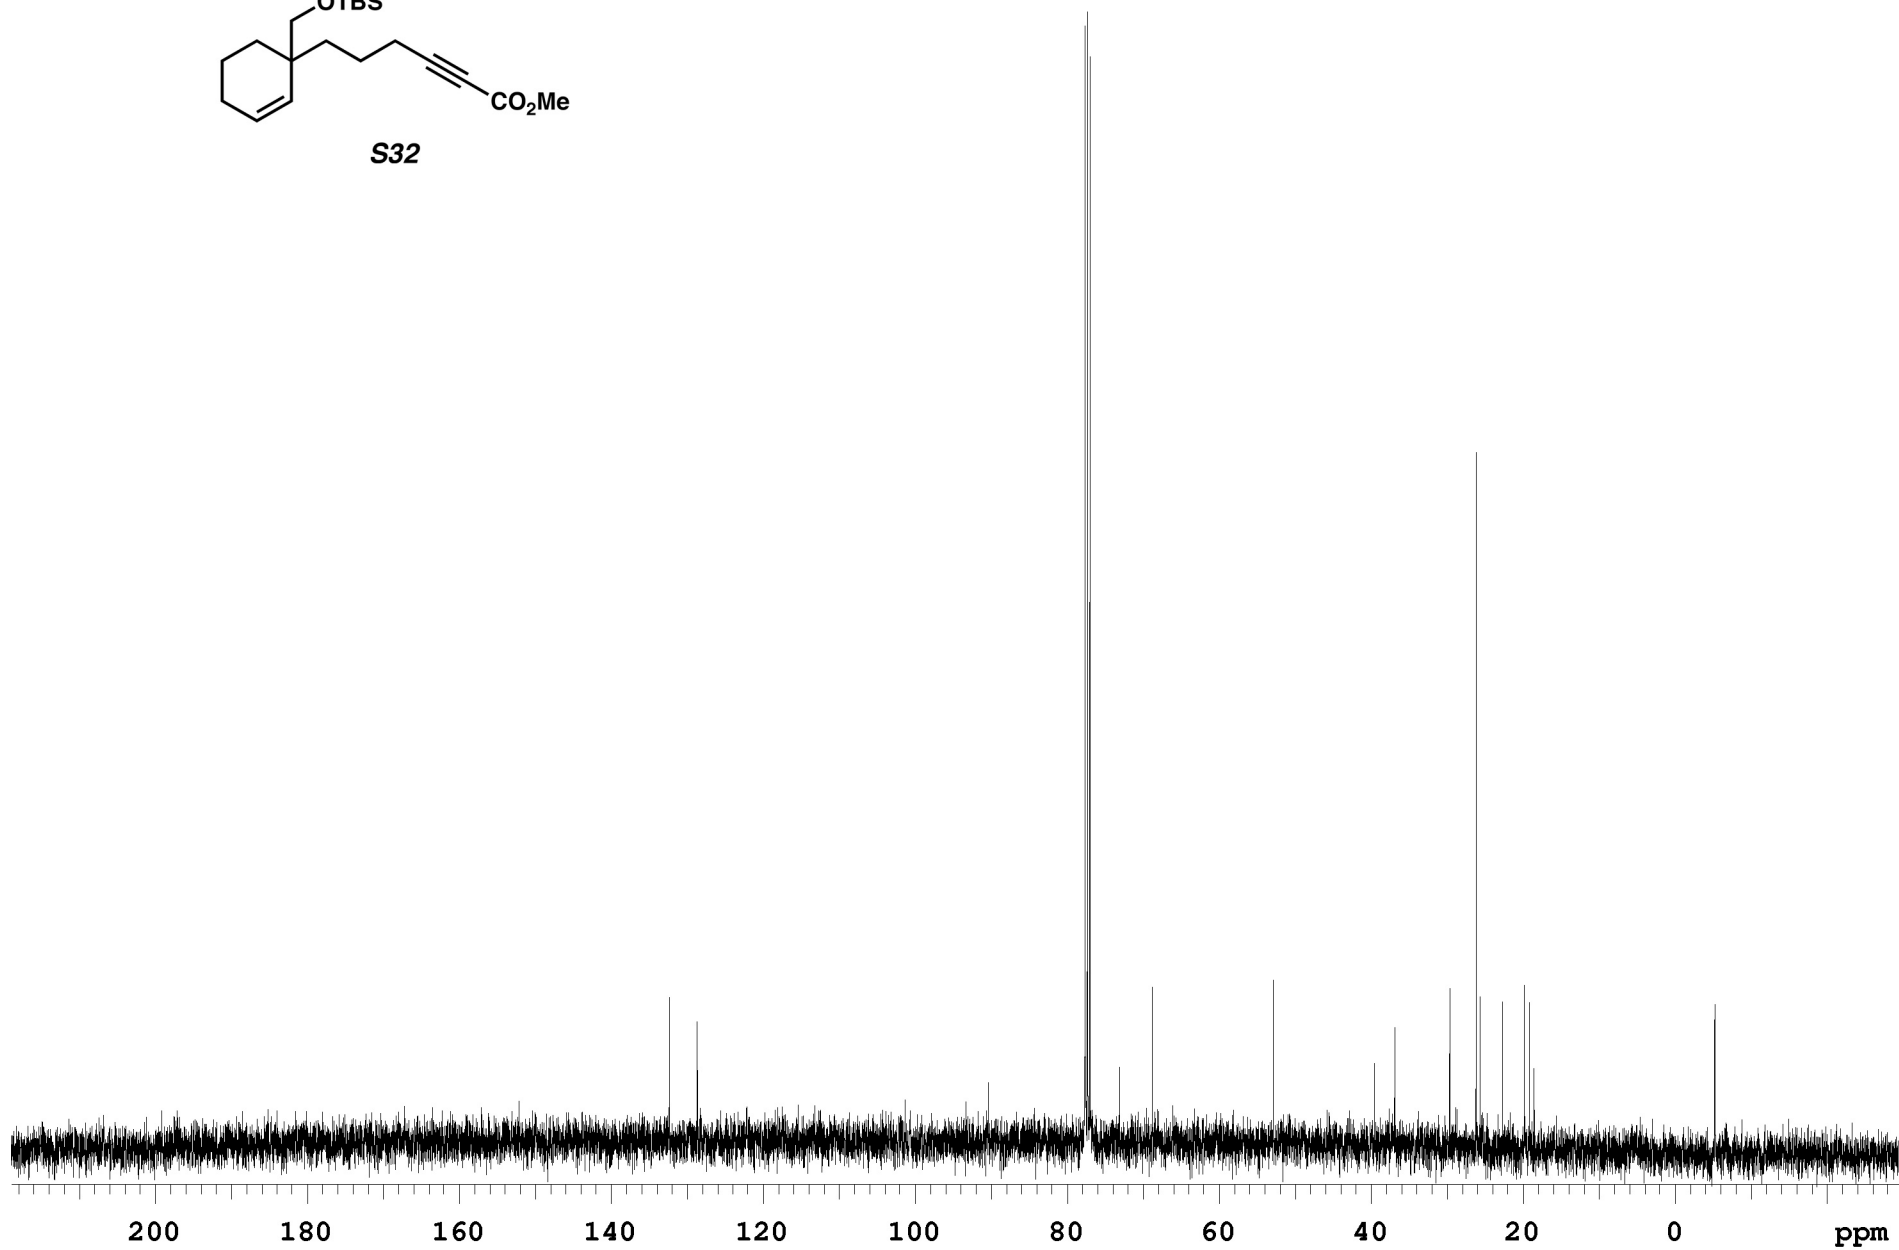

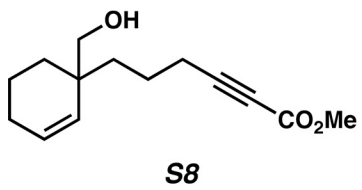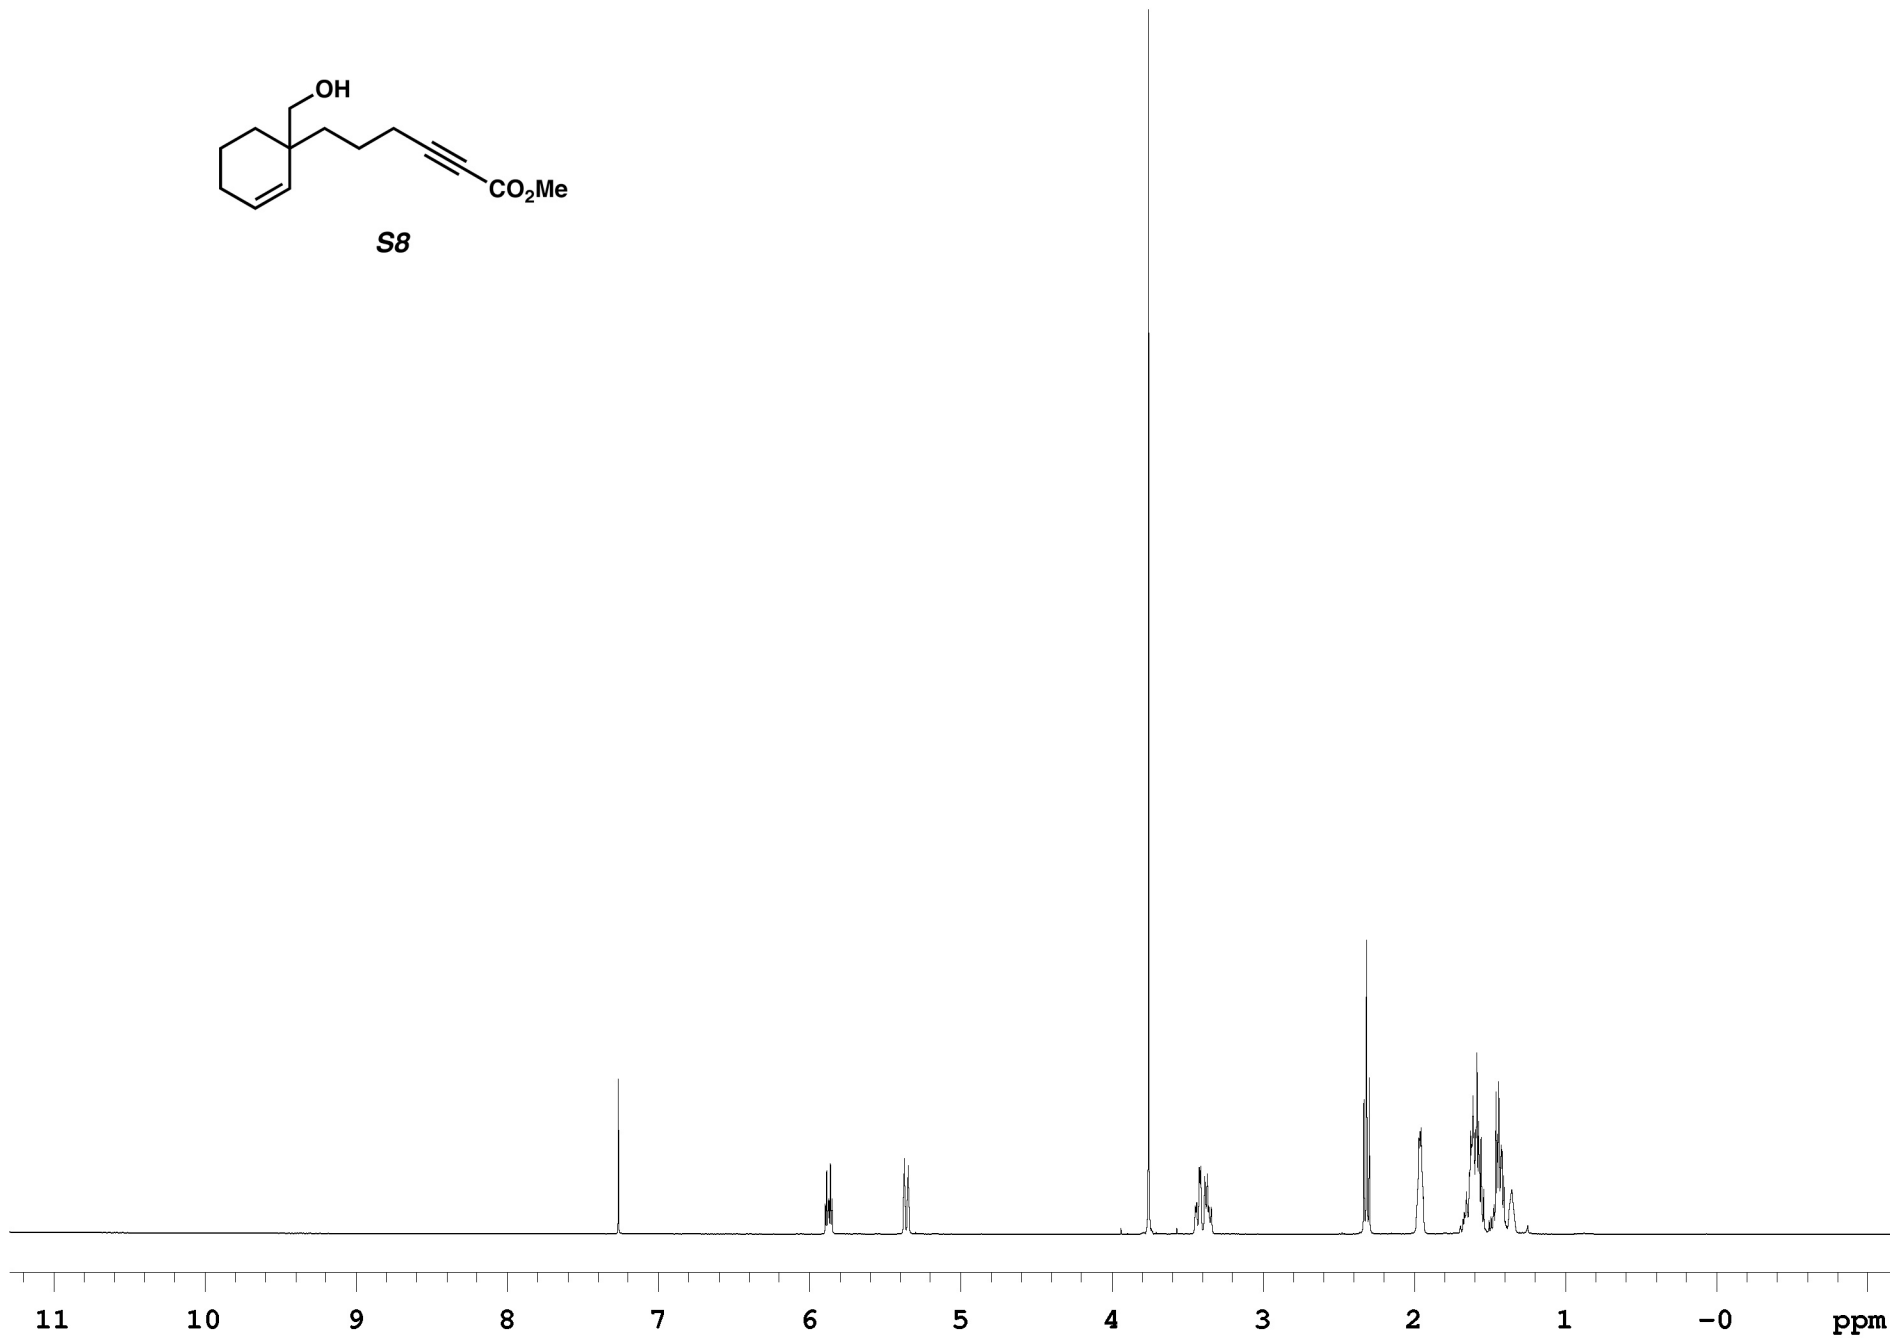

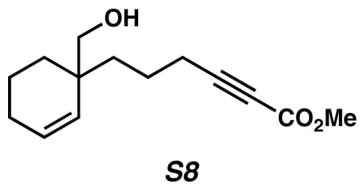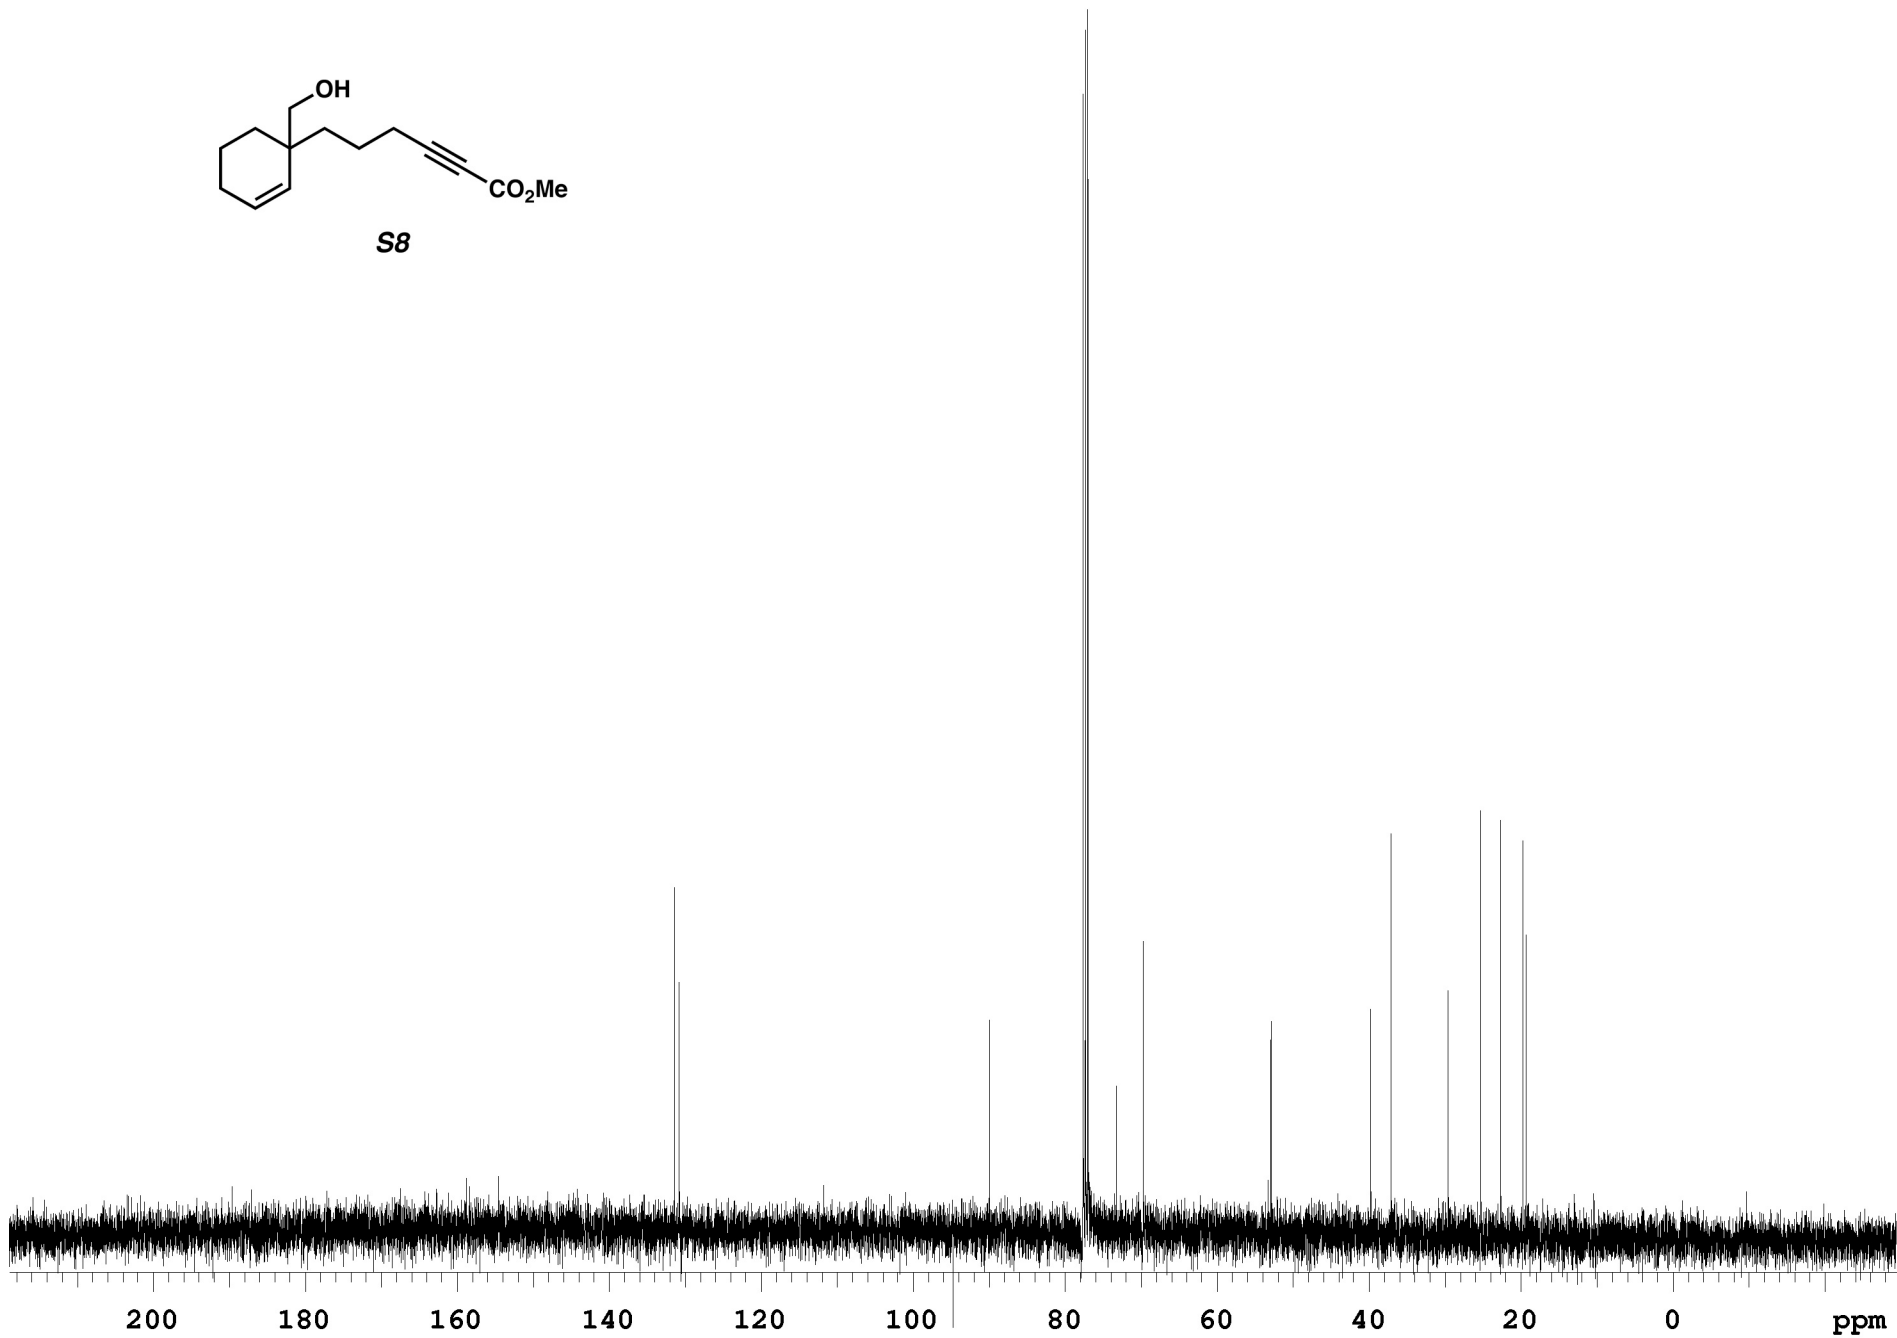

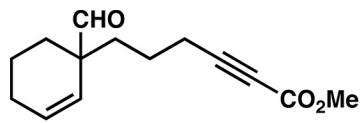

**S1**

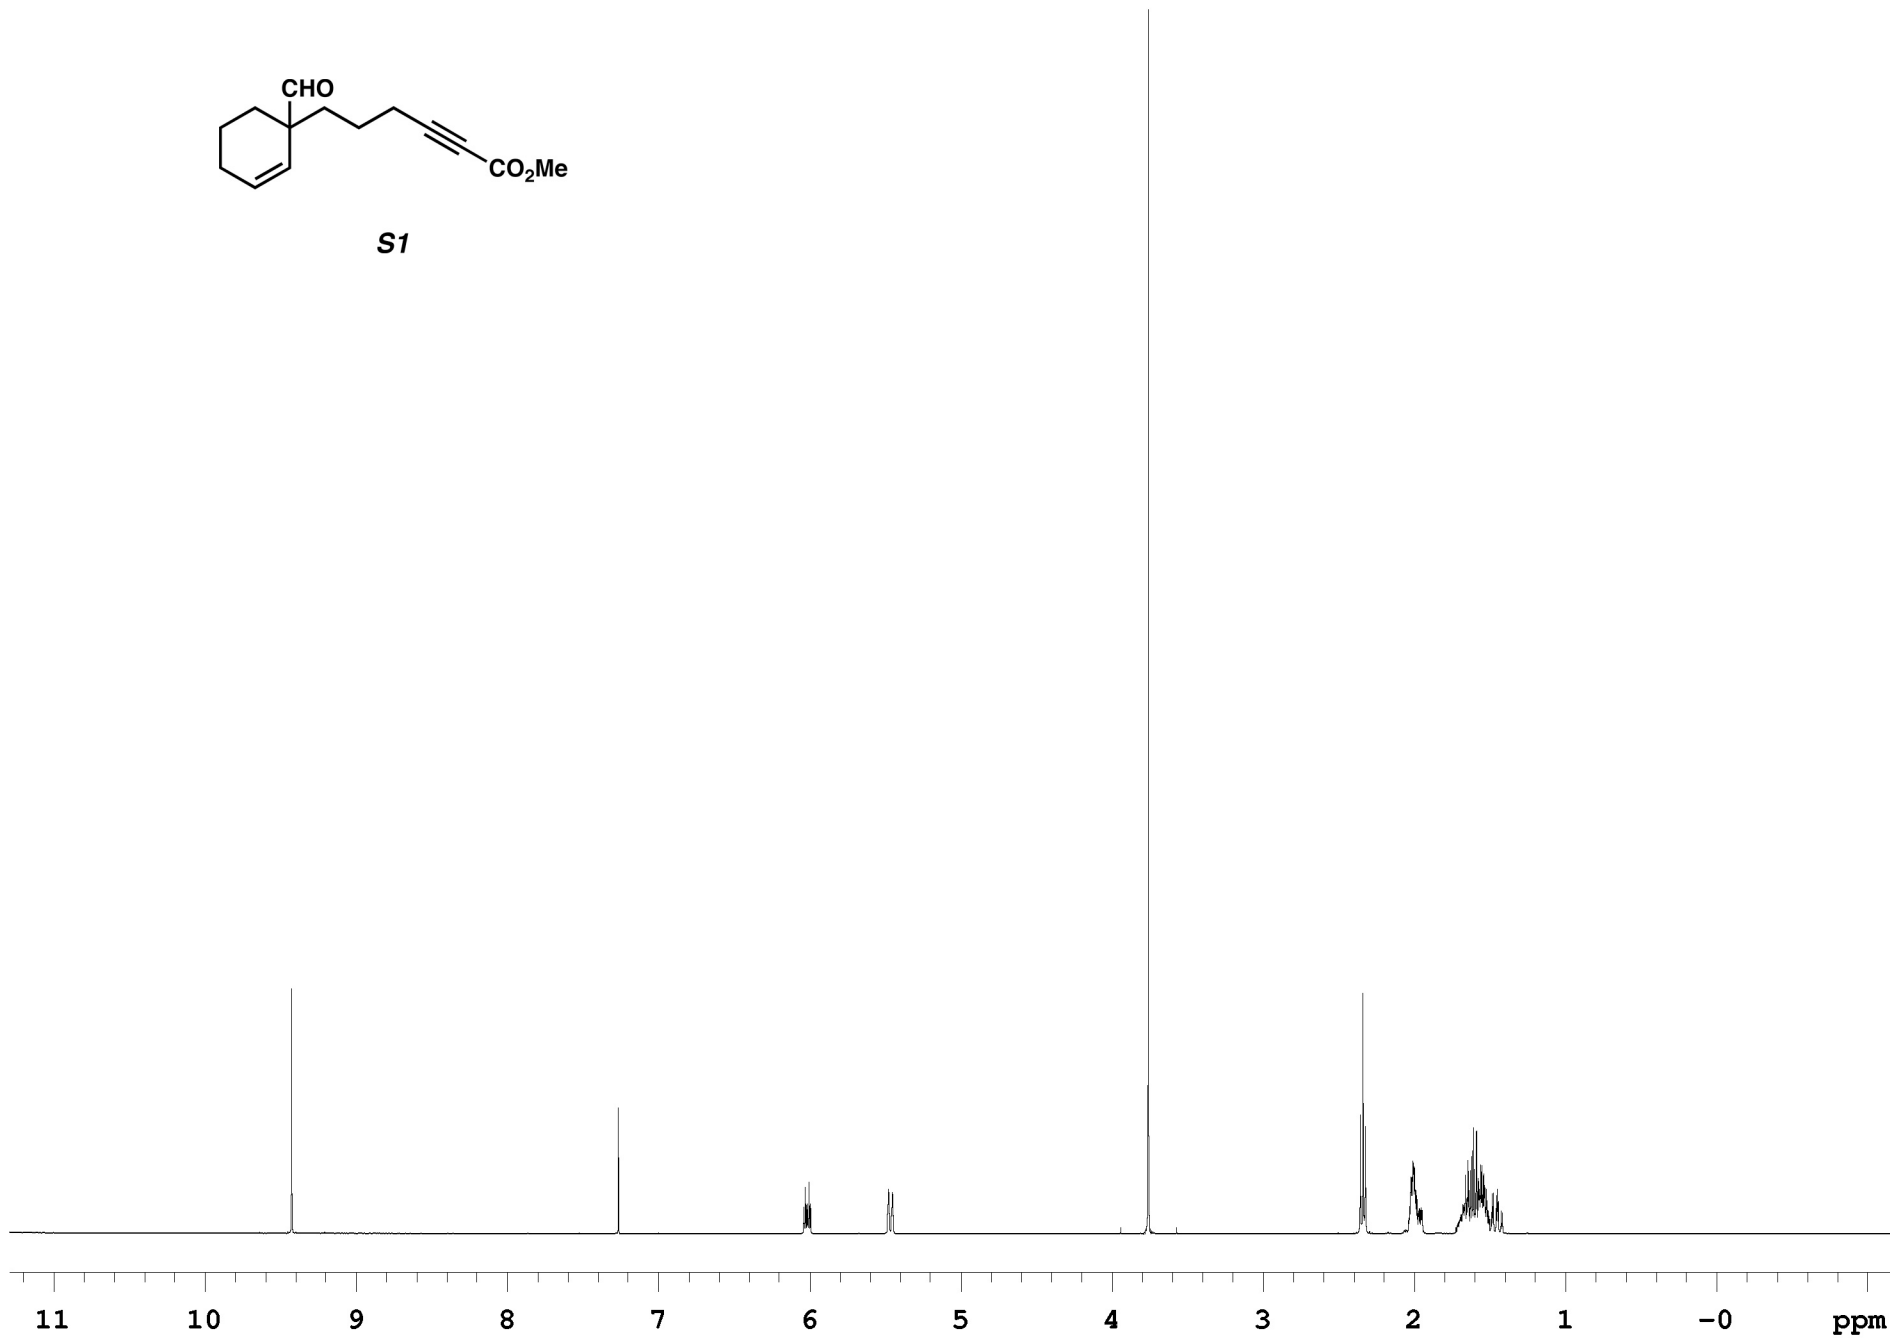

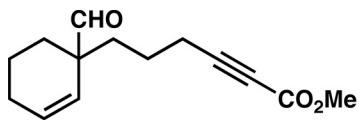

*S1*

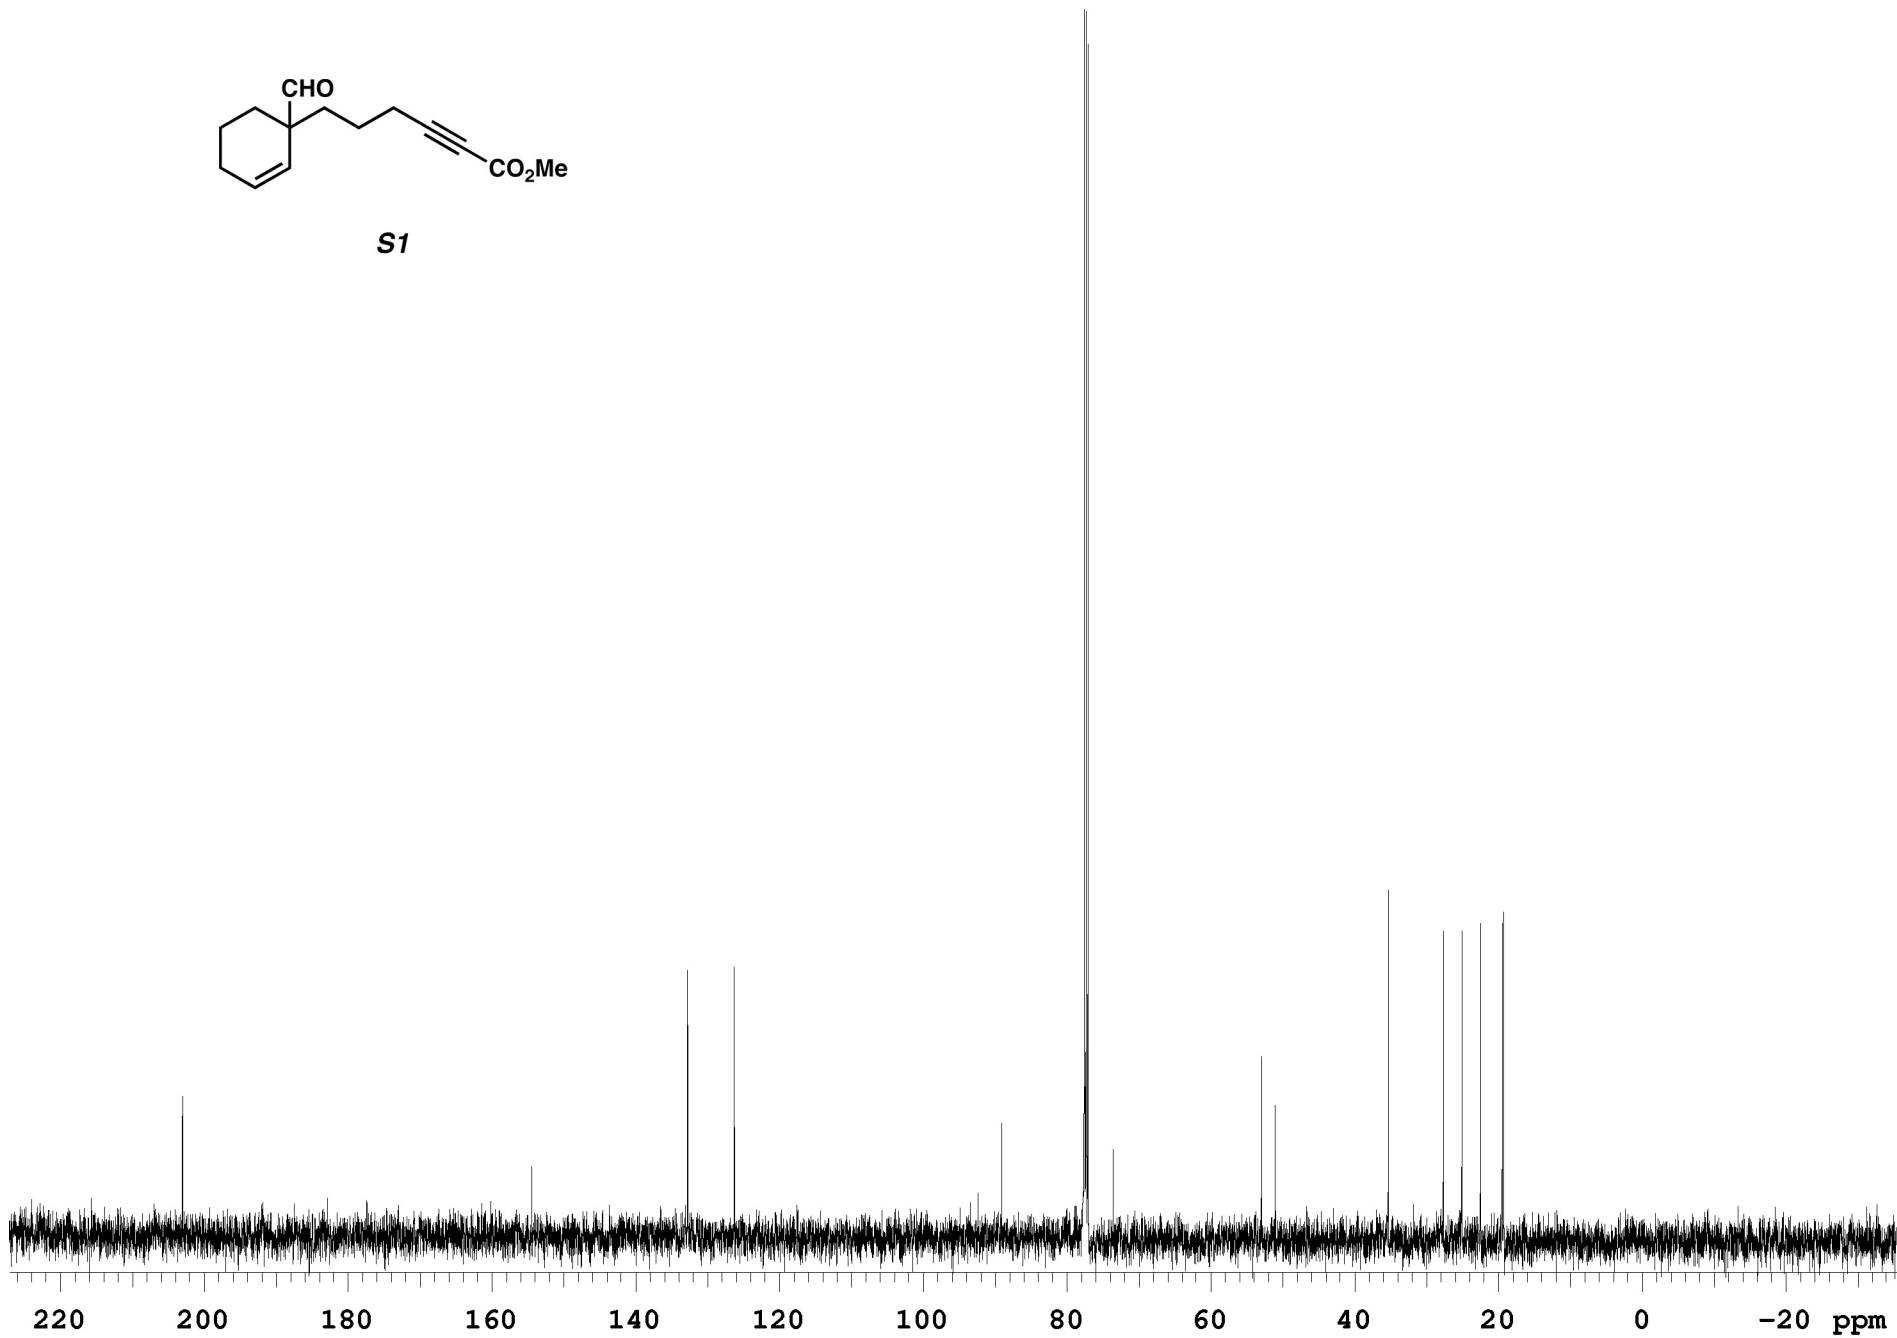



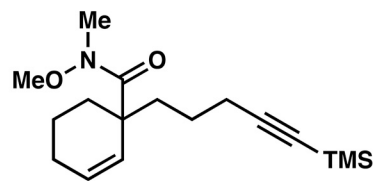

S33

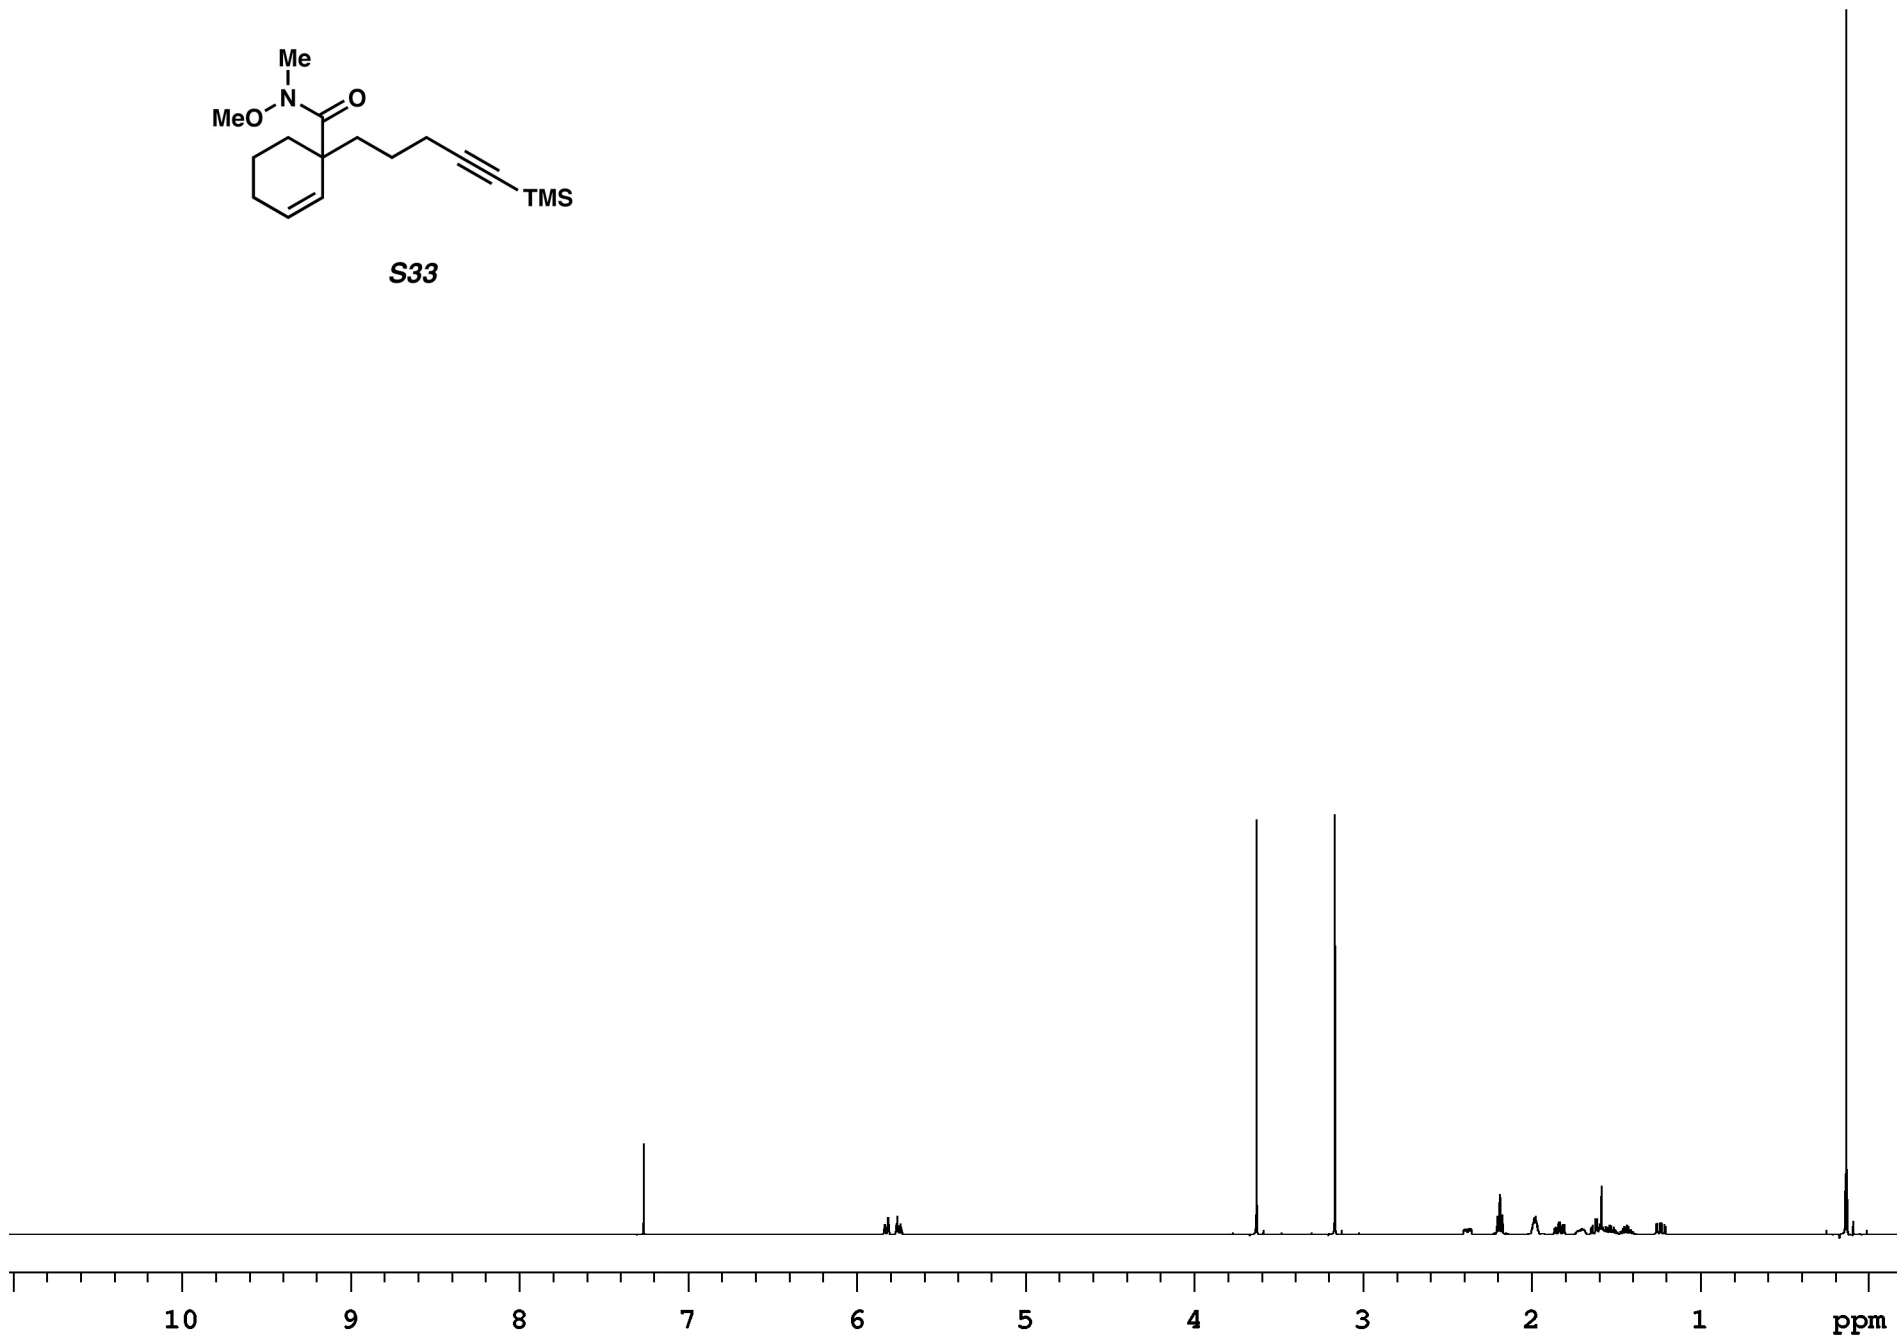

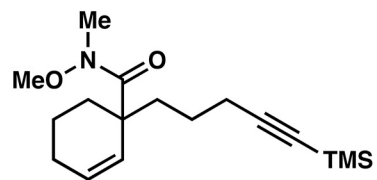

S33

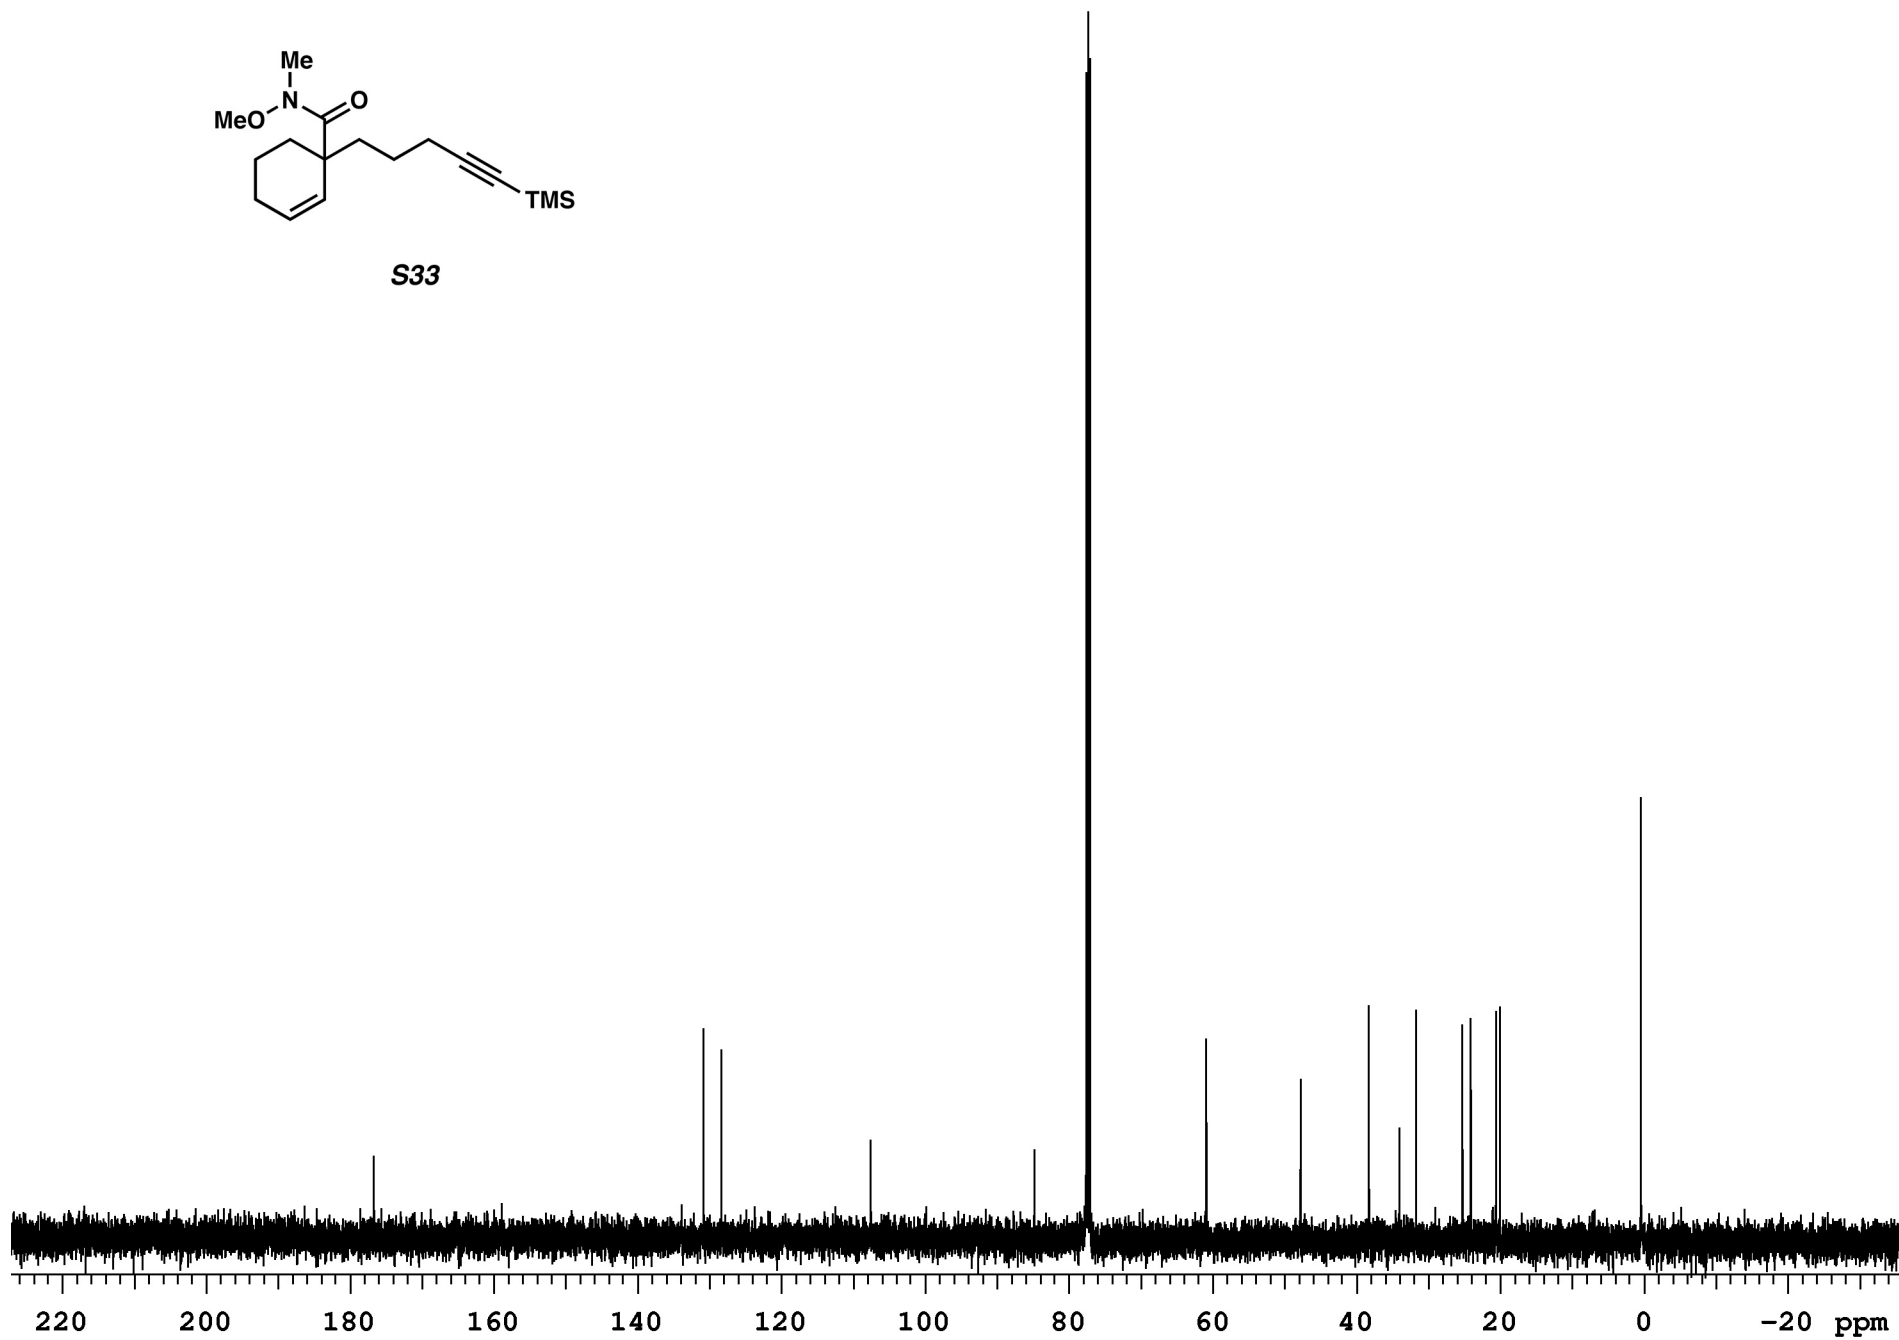

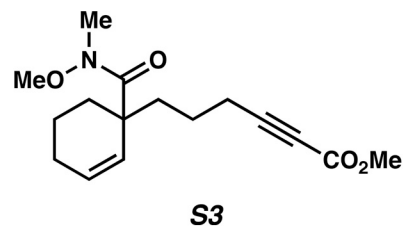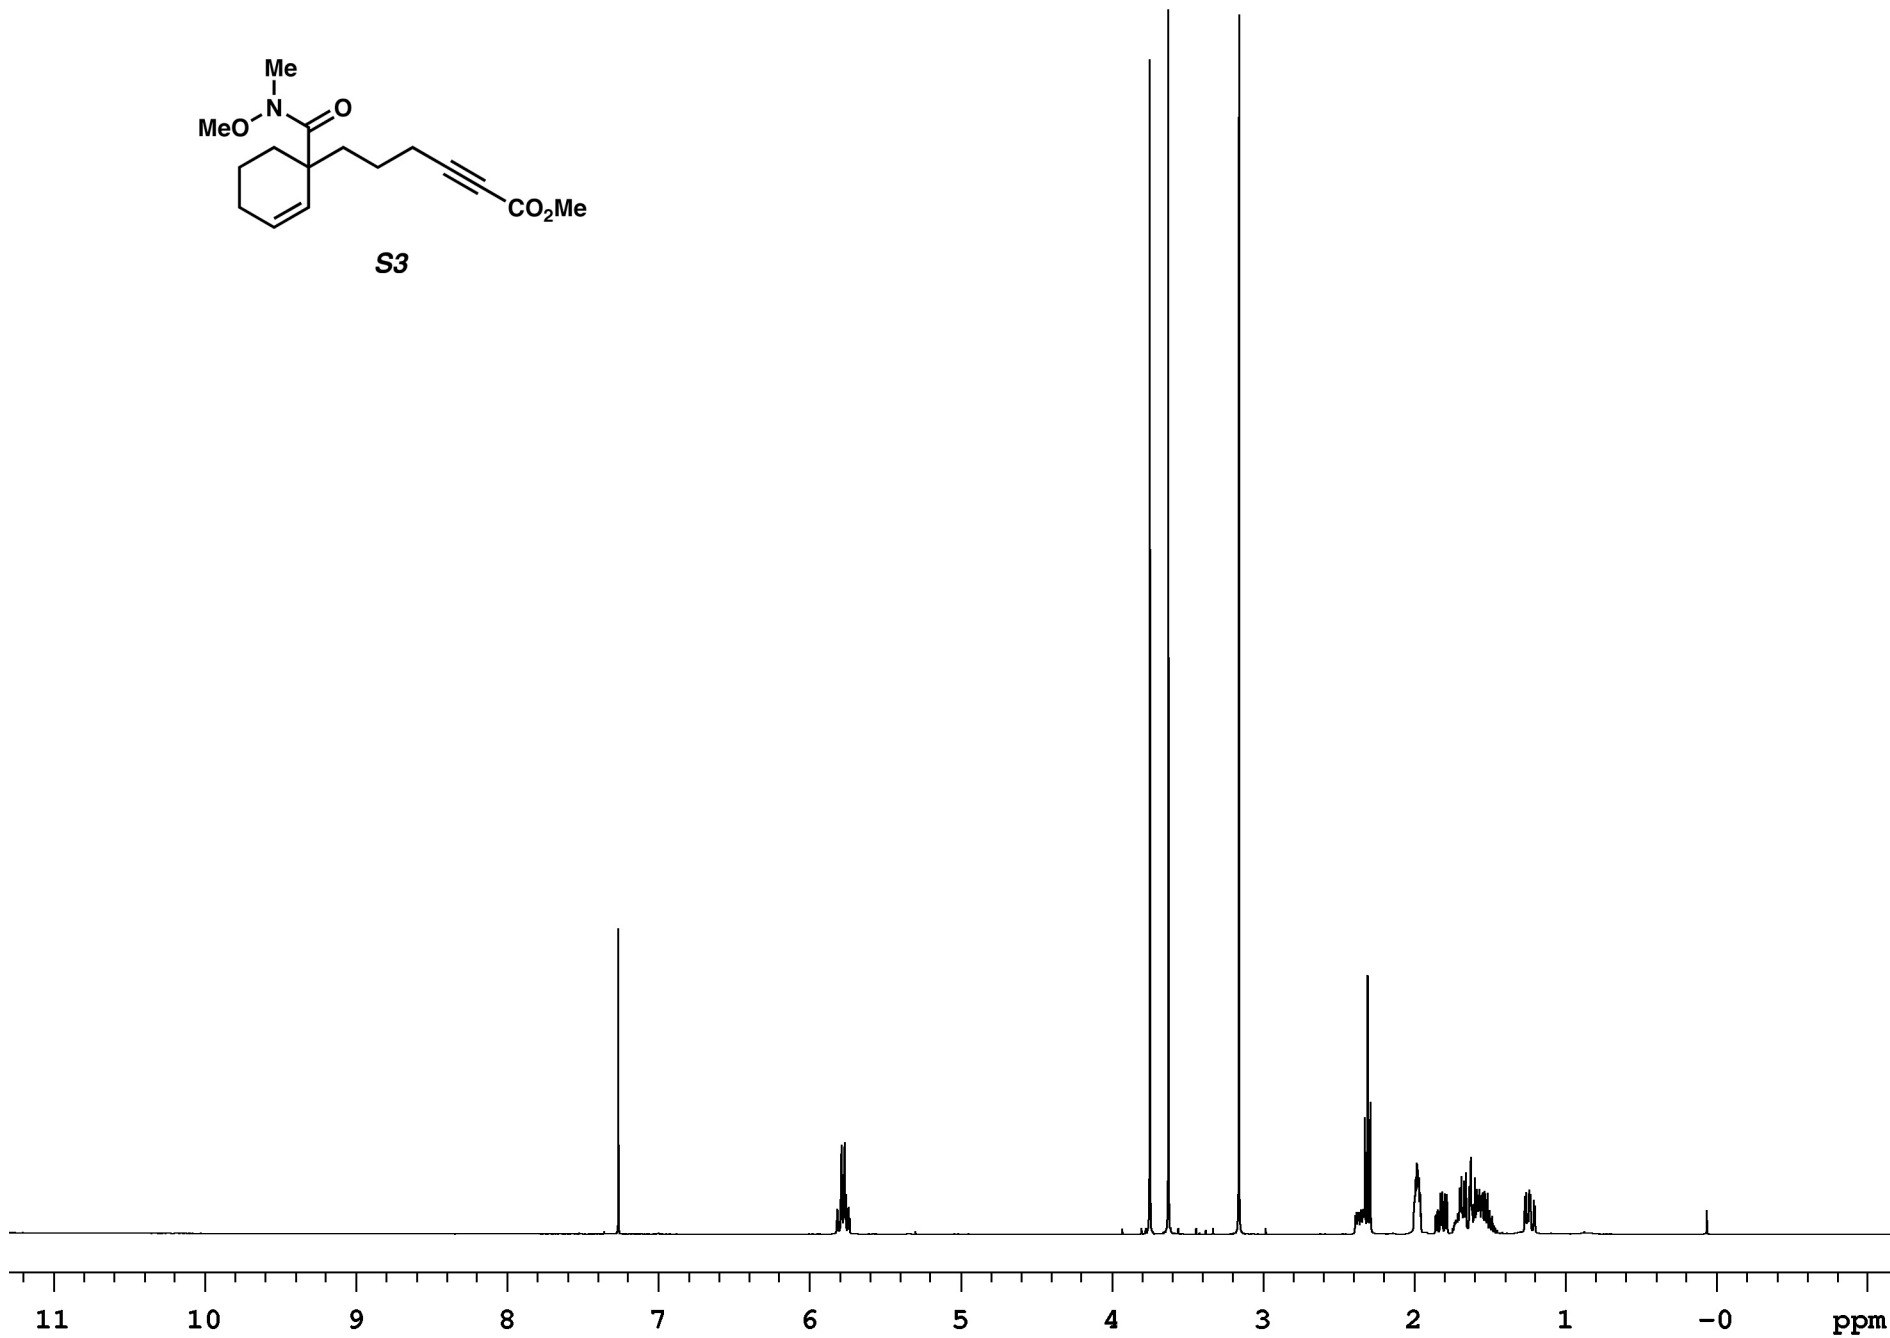

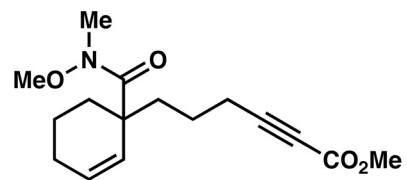

S3

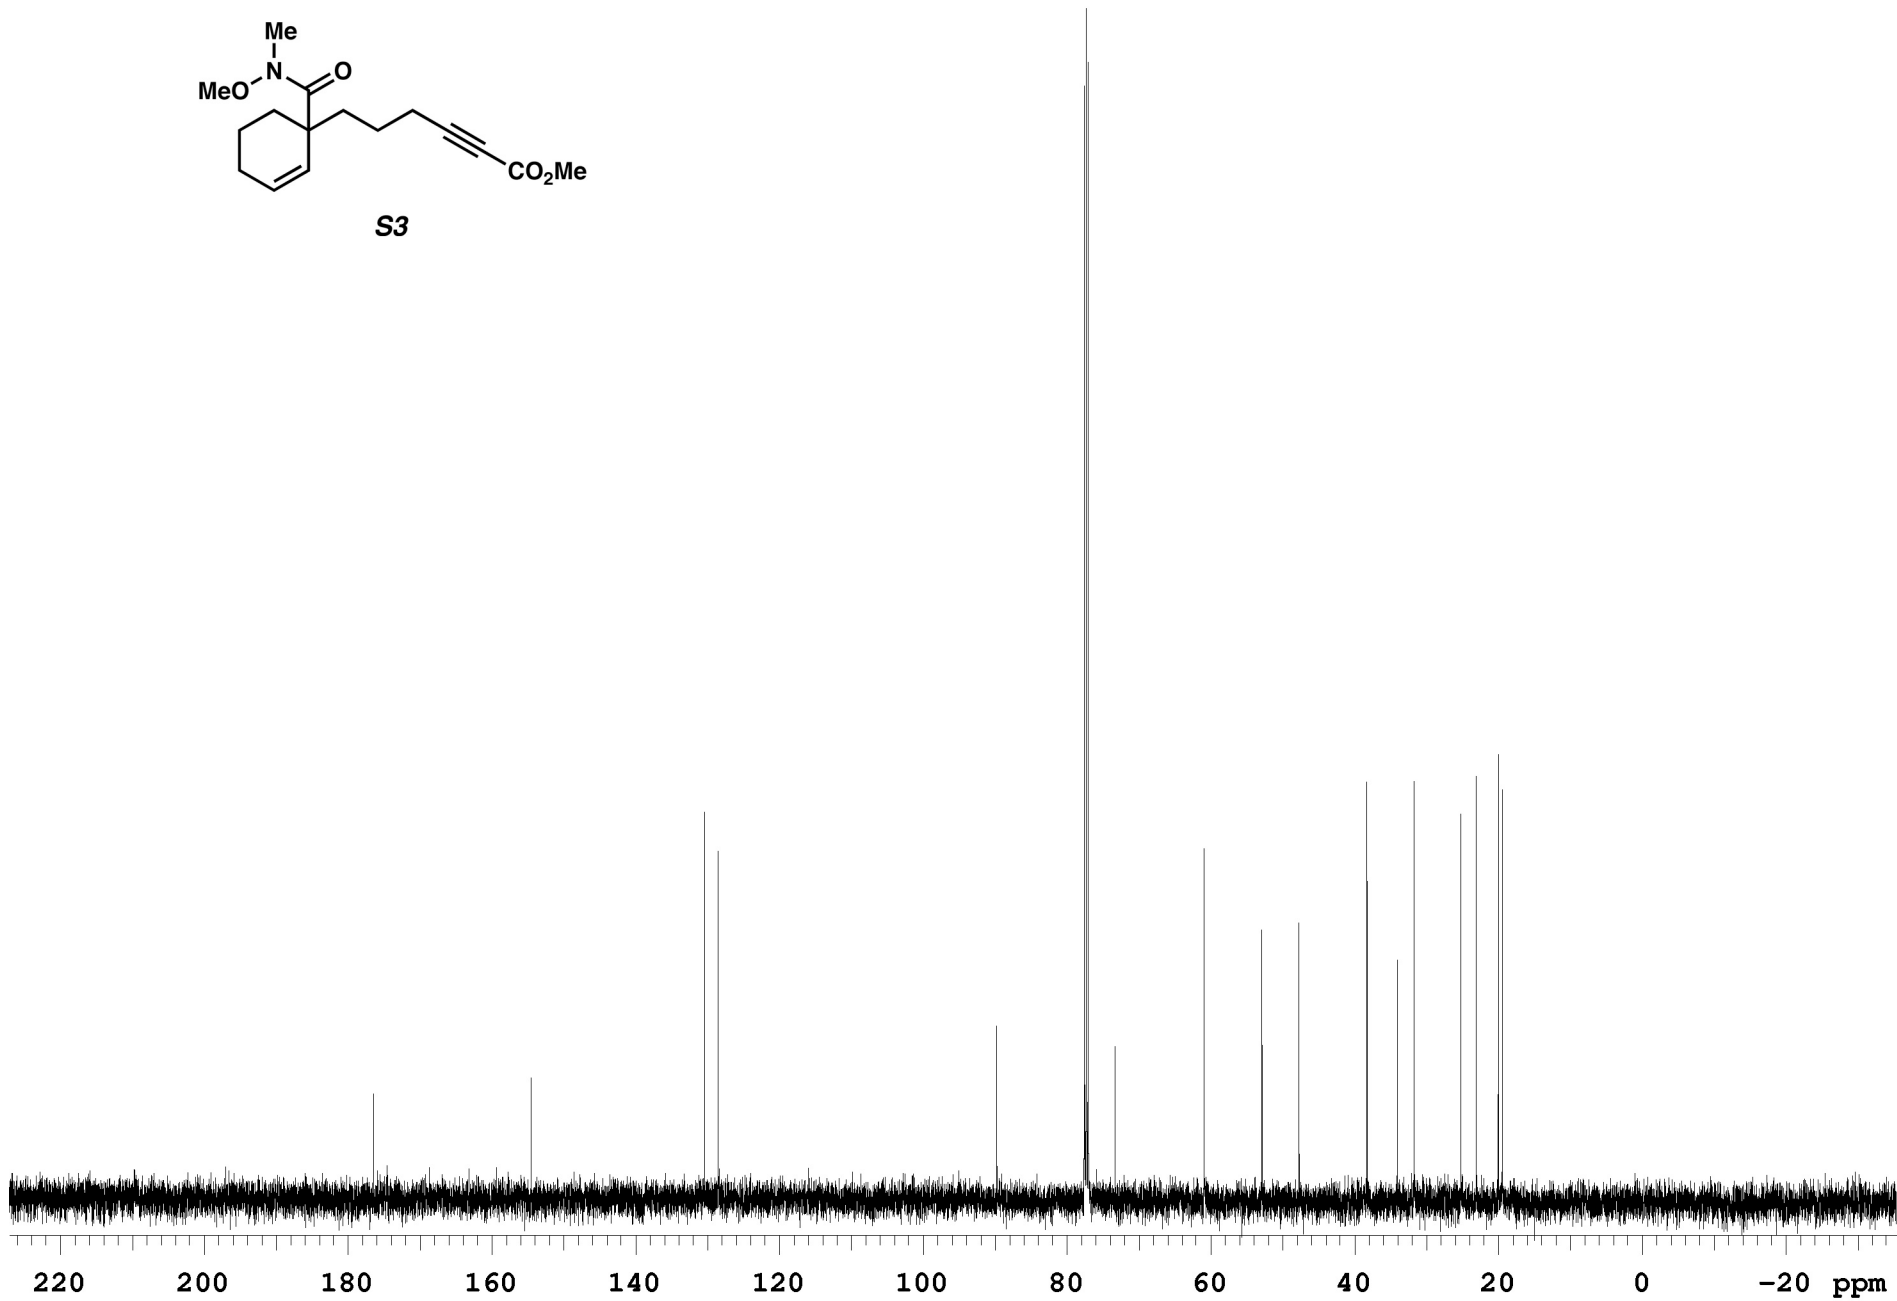

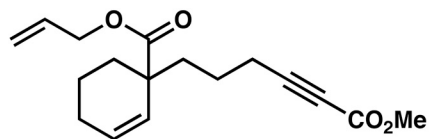

**S35**

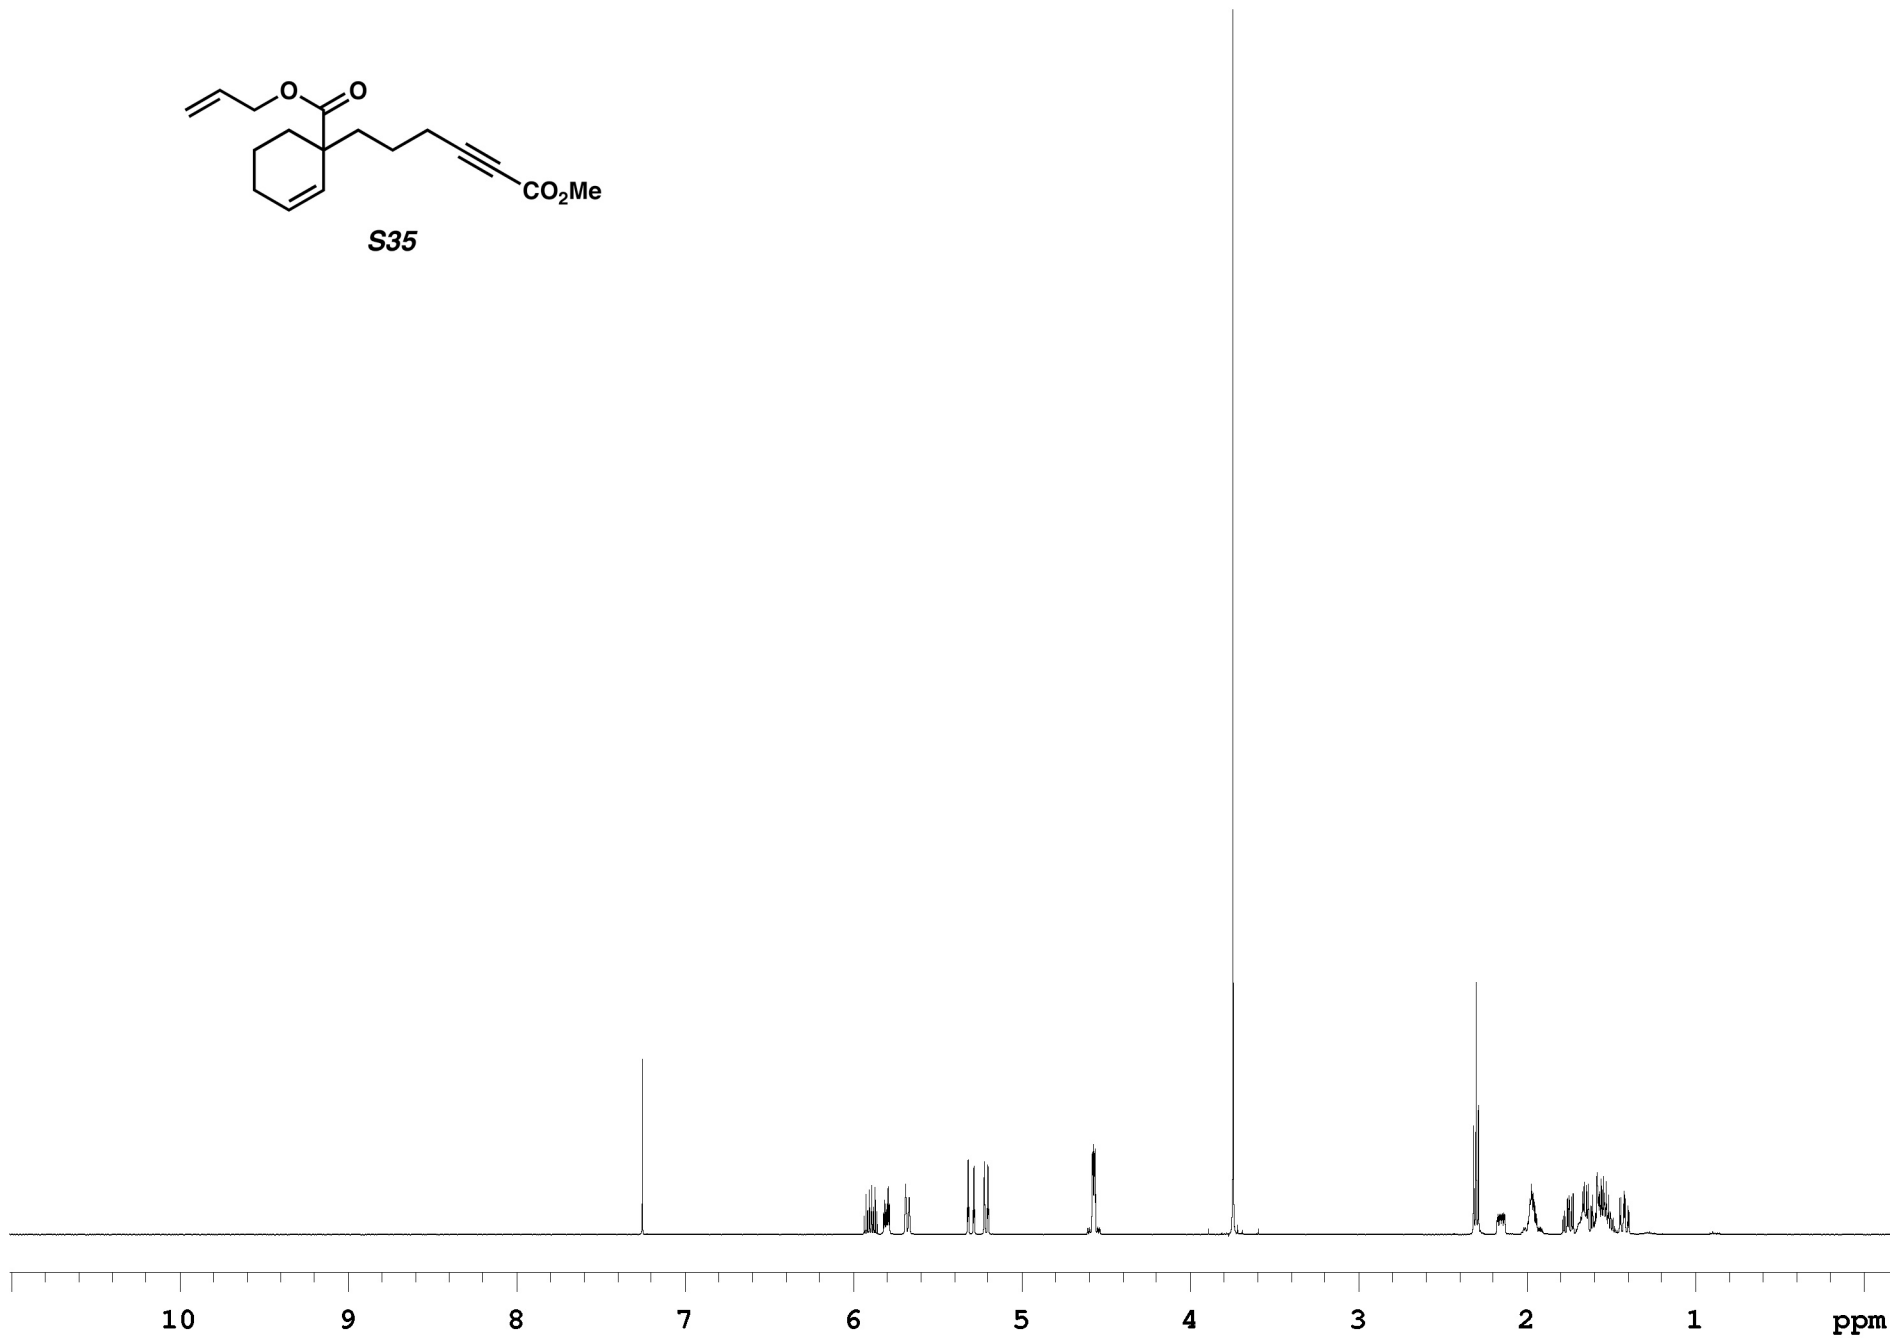

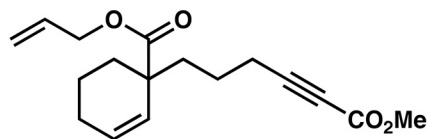

S35

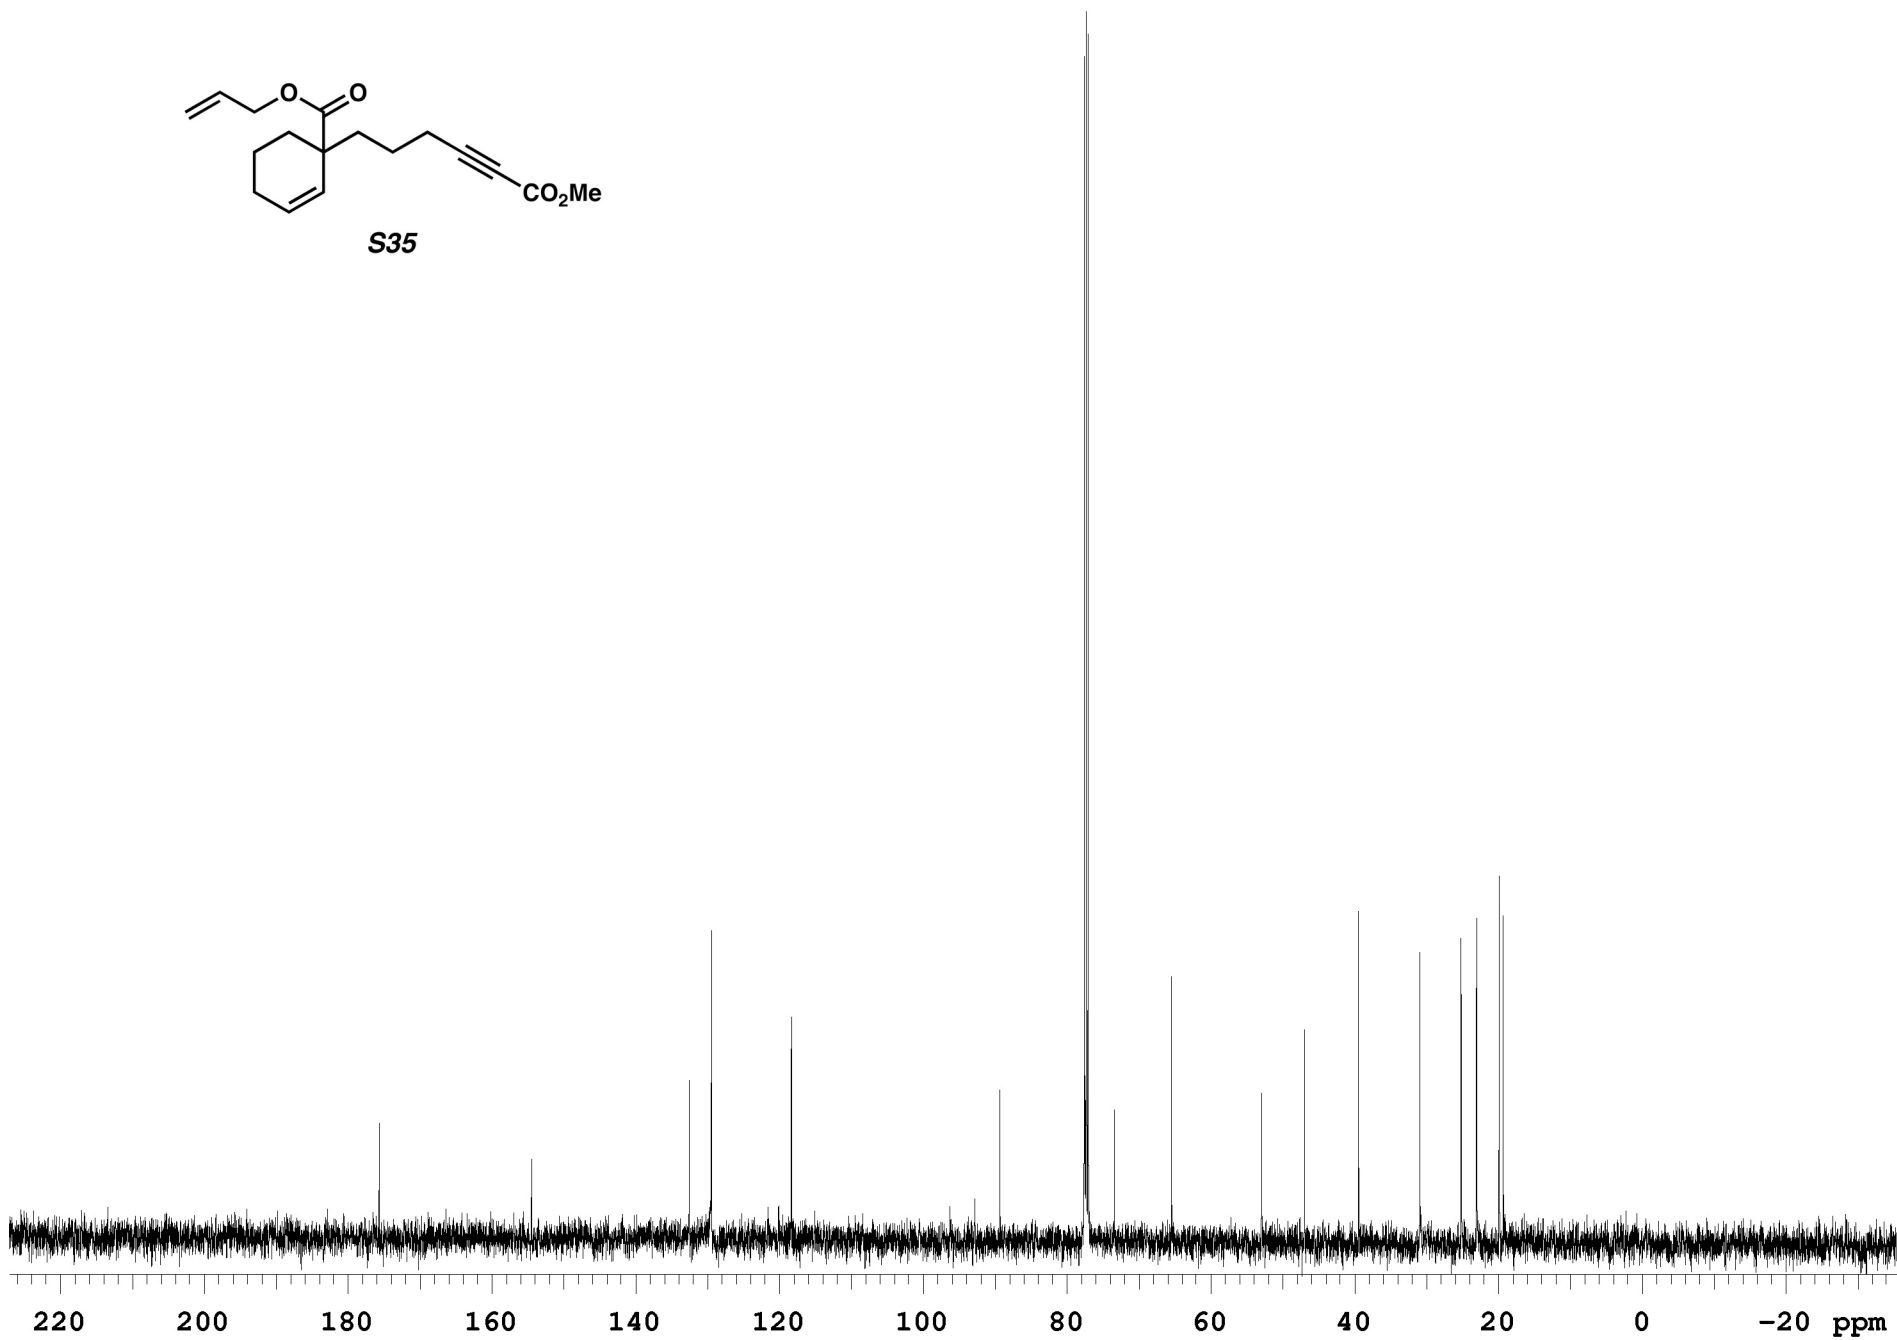

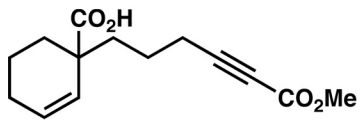

S5

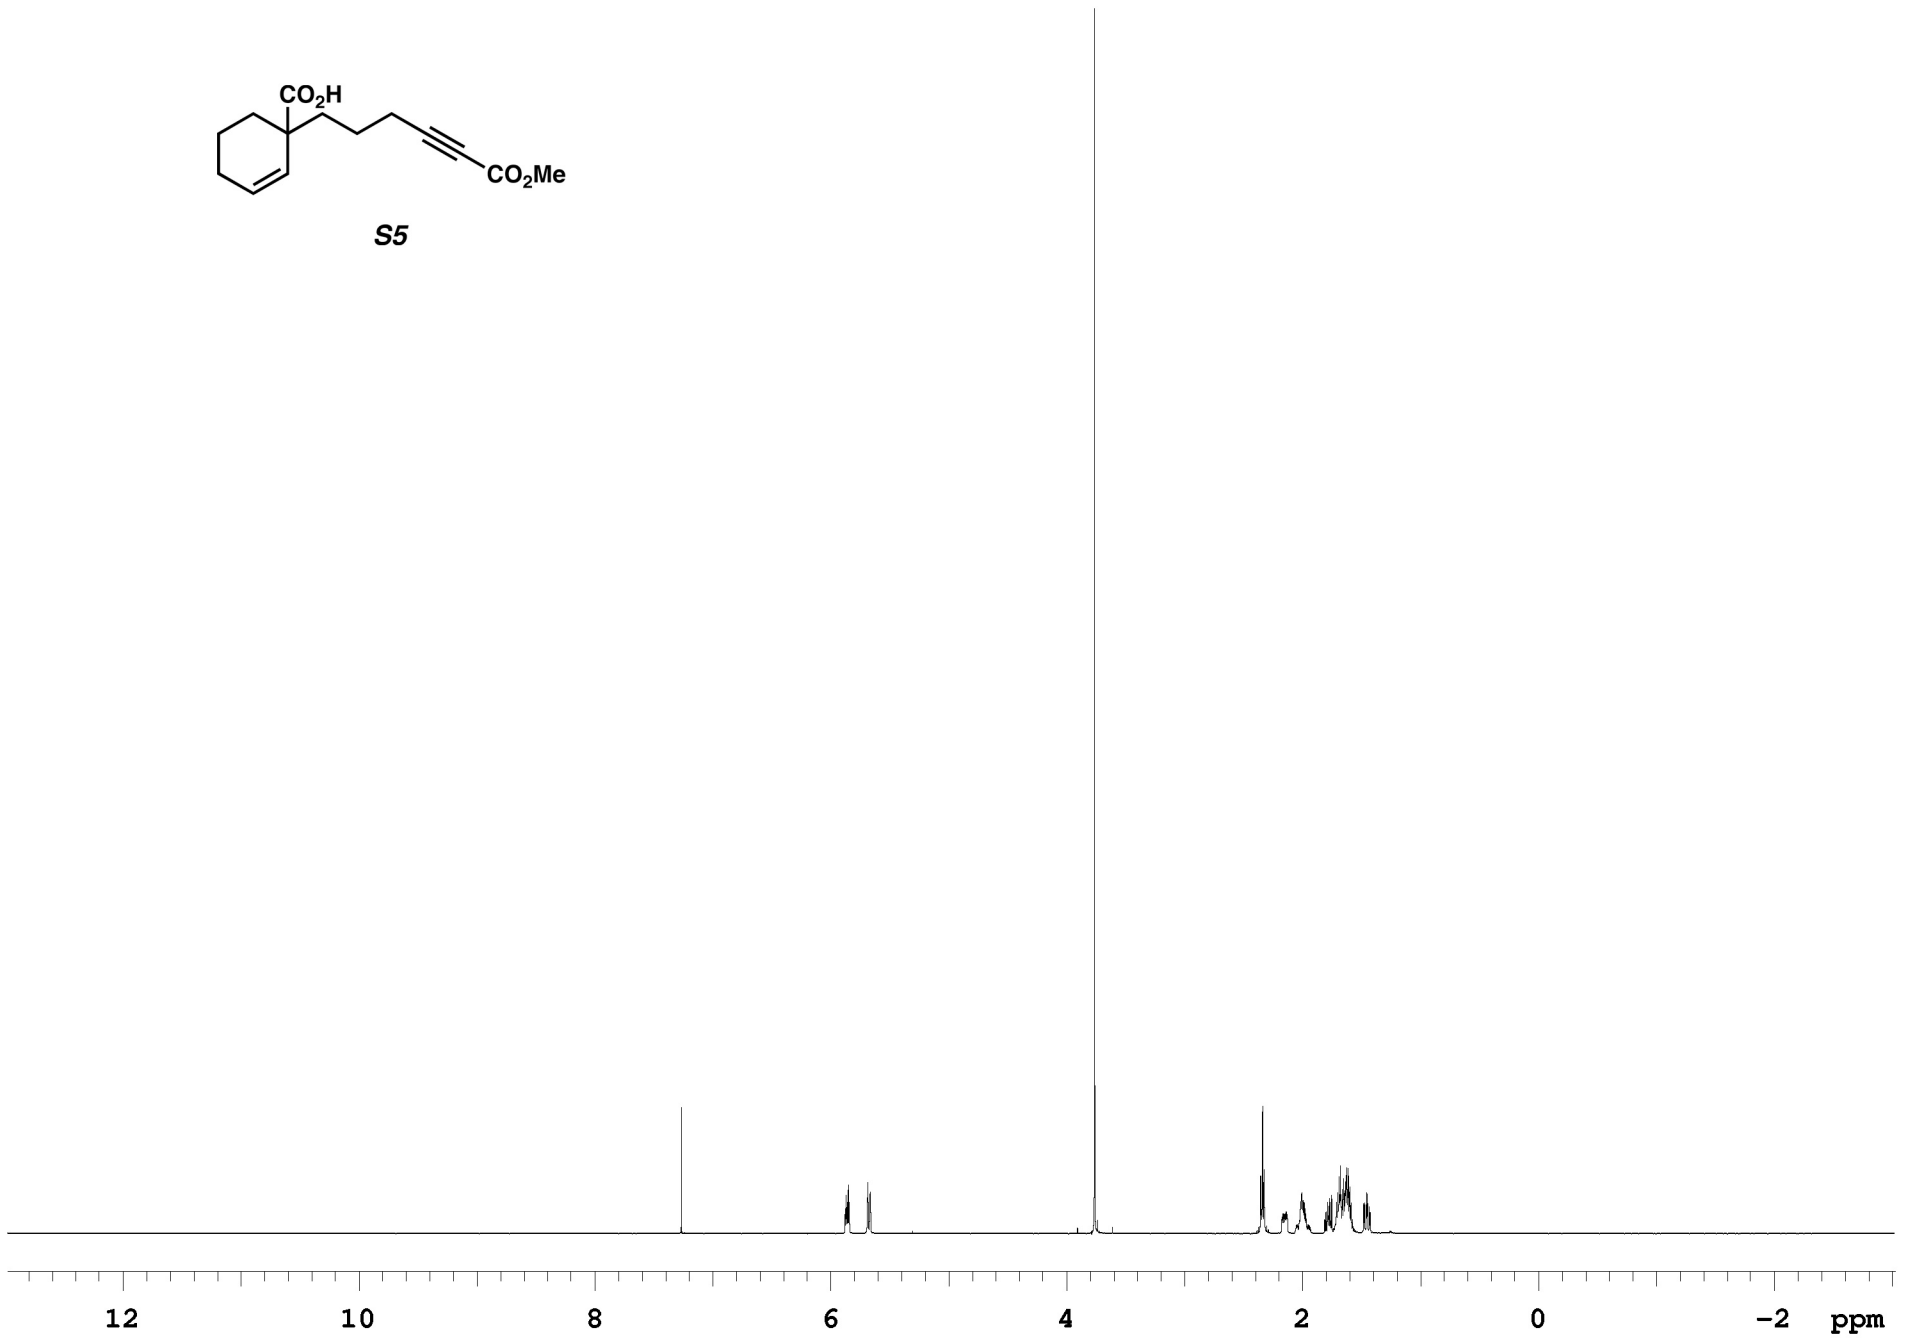

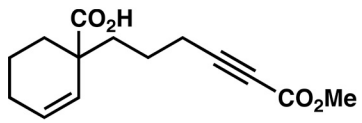

S5

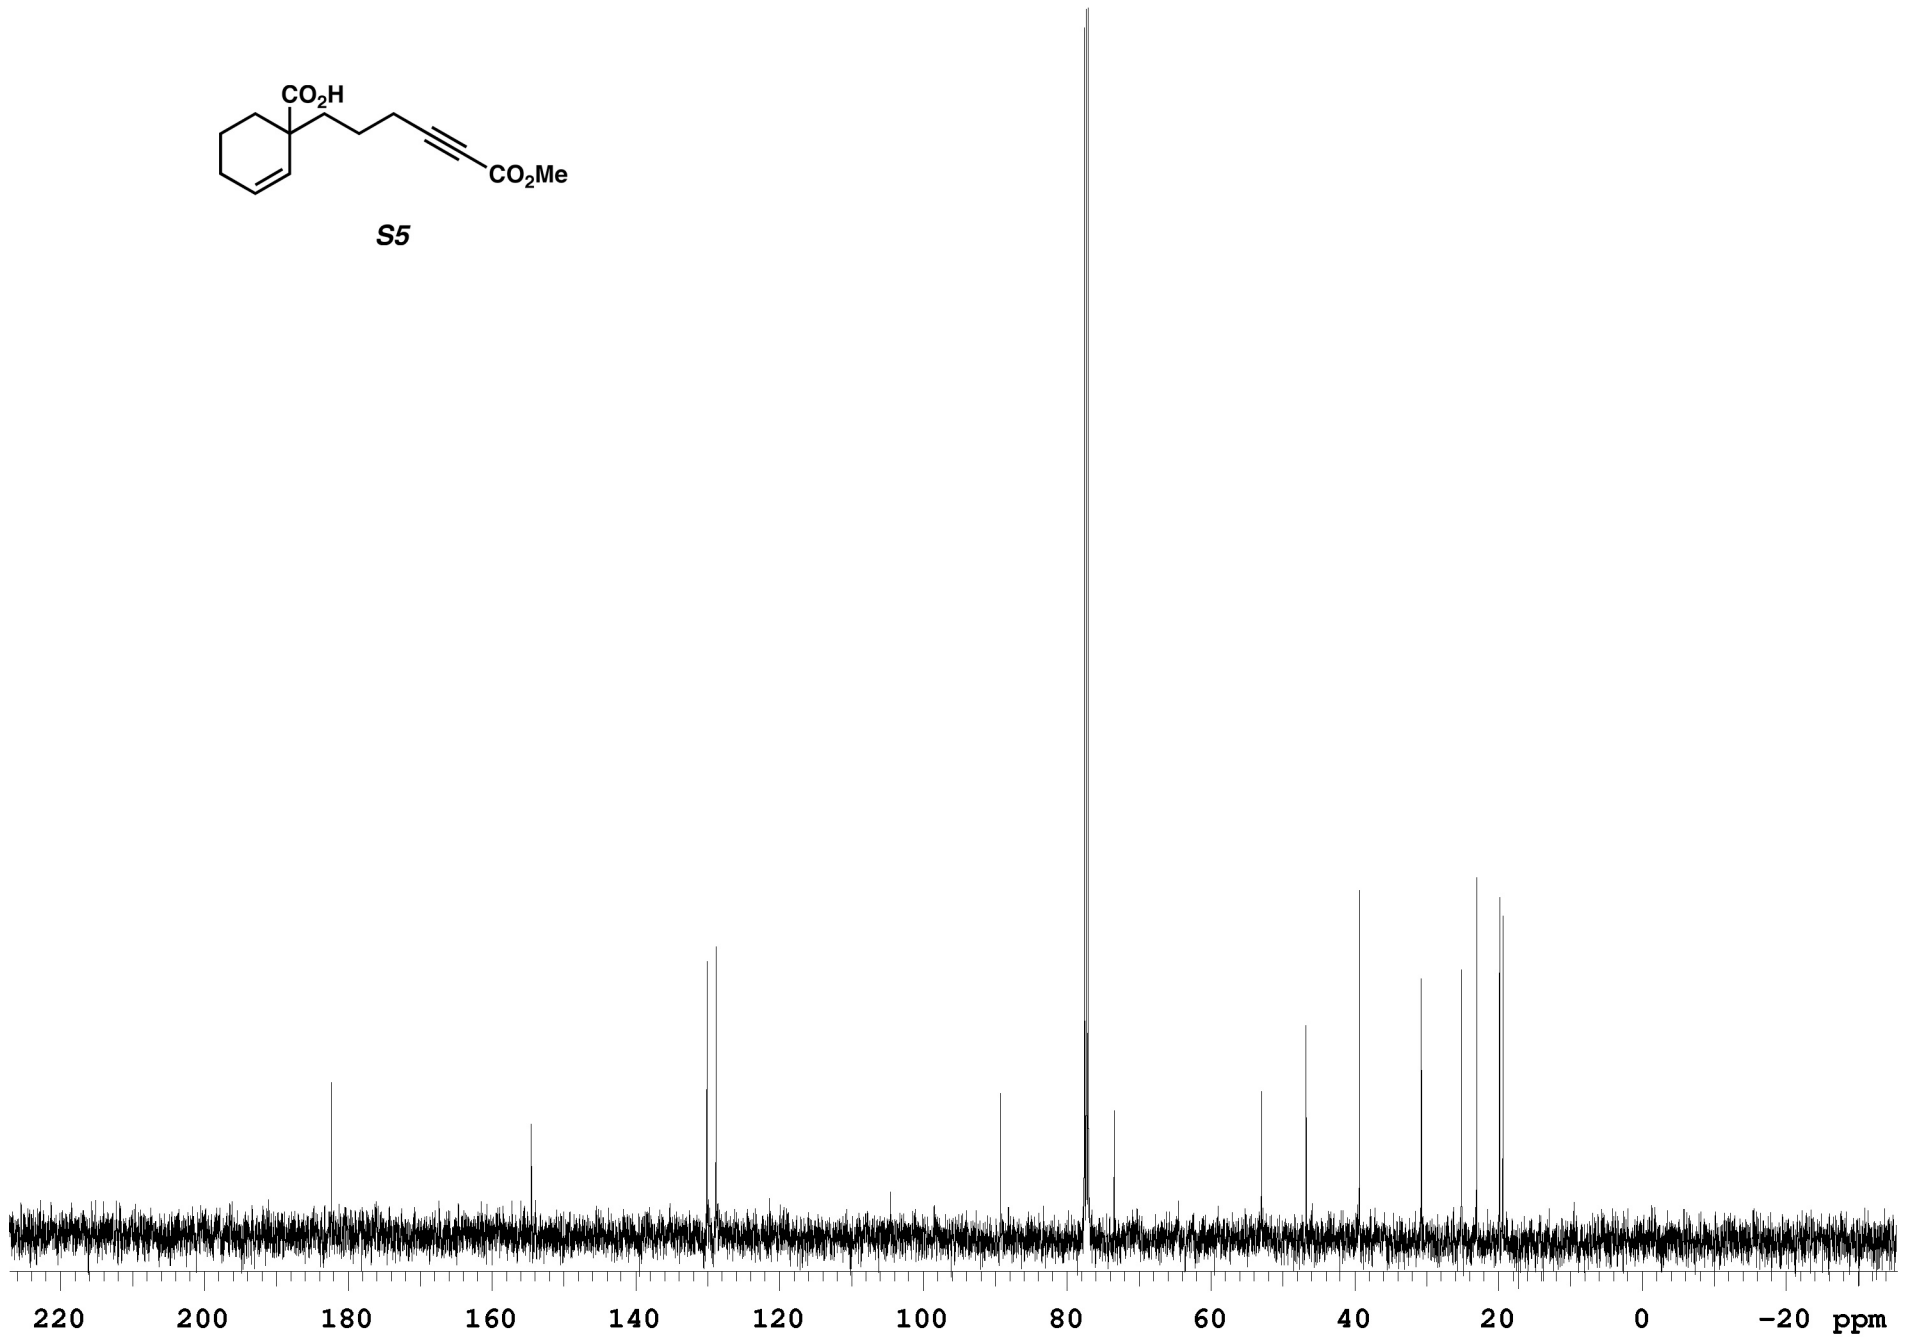



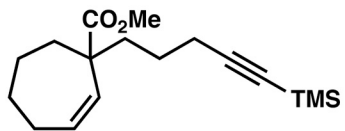

S40

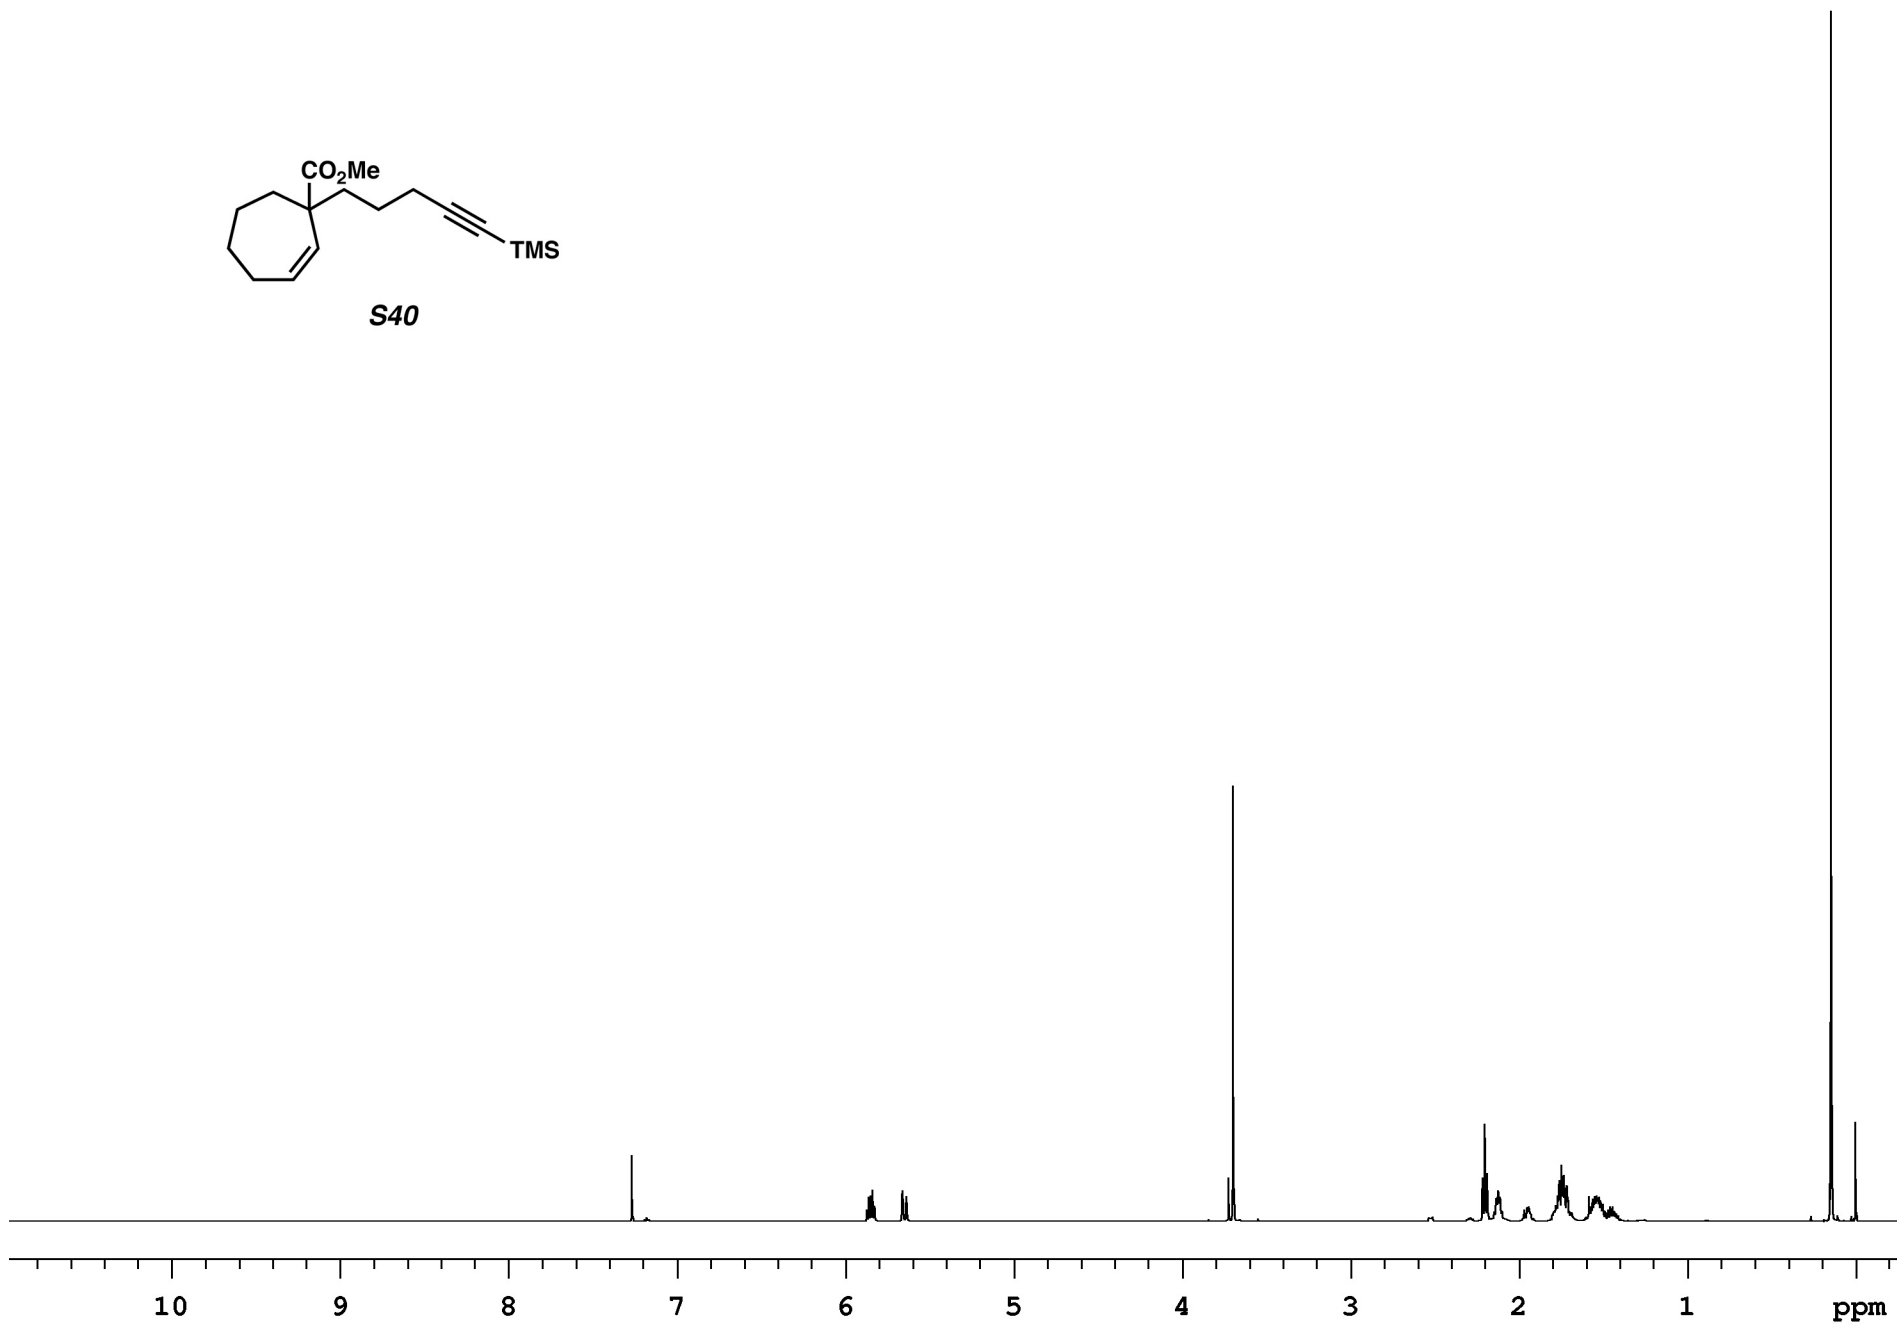

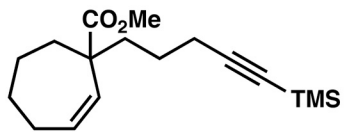

*S40*

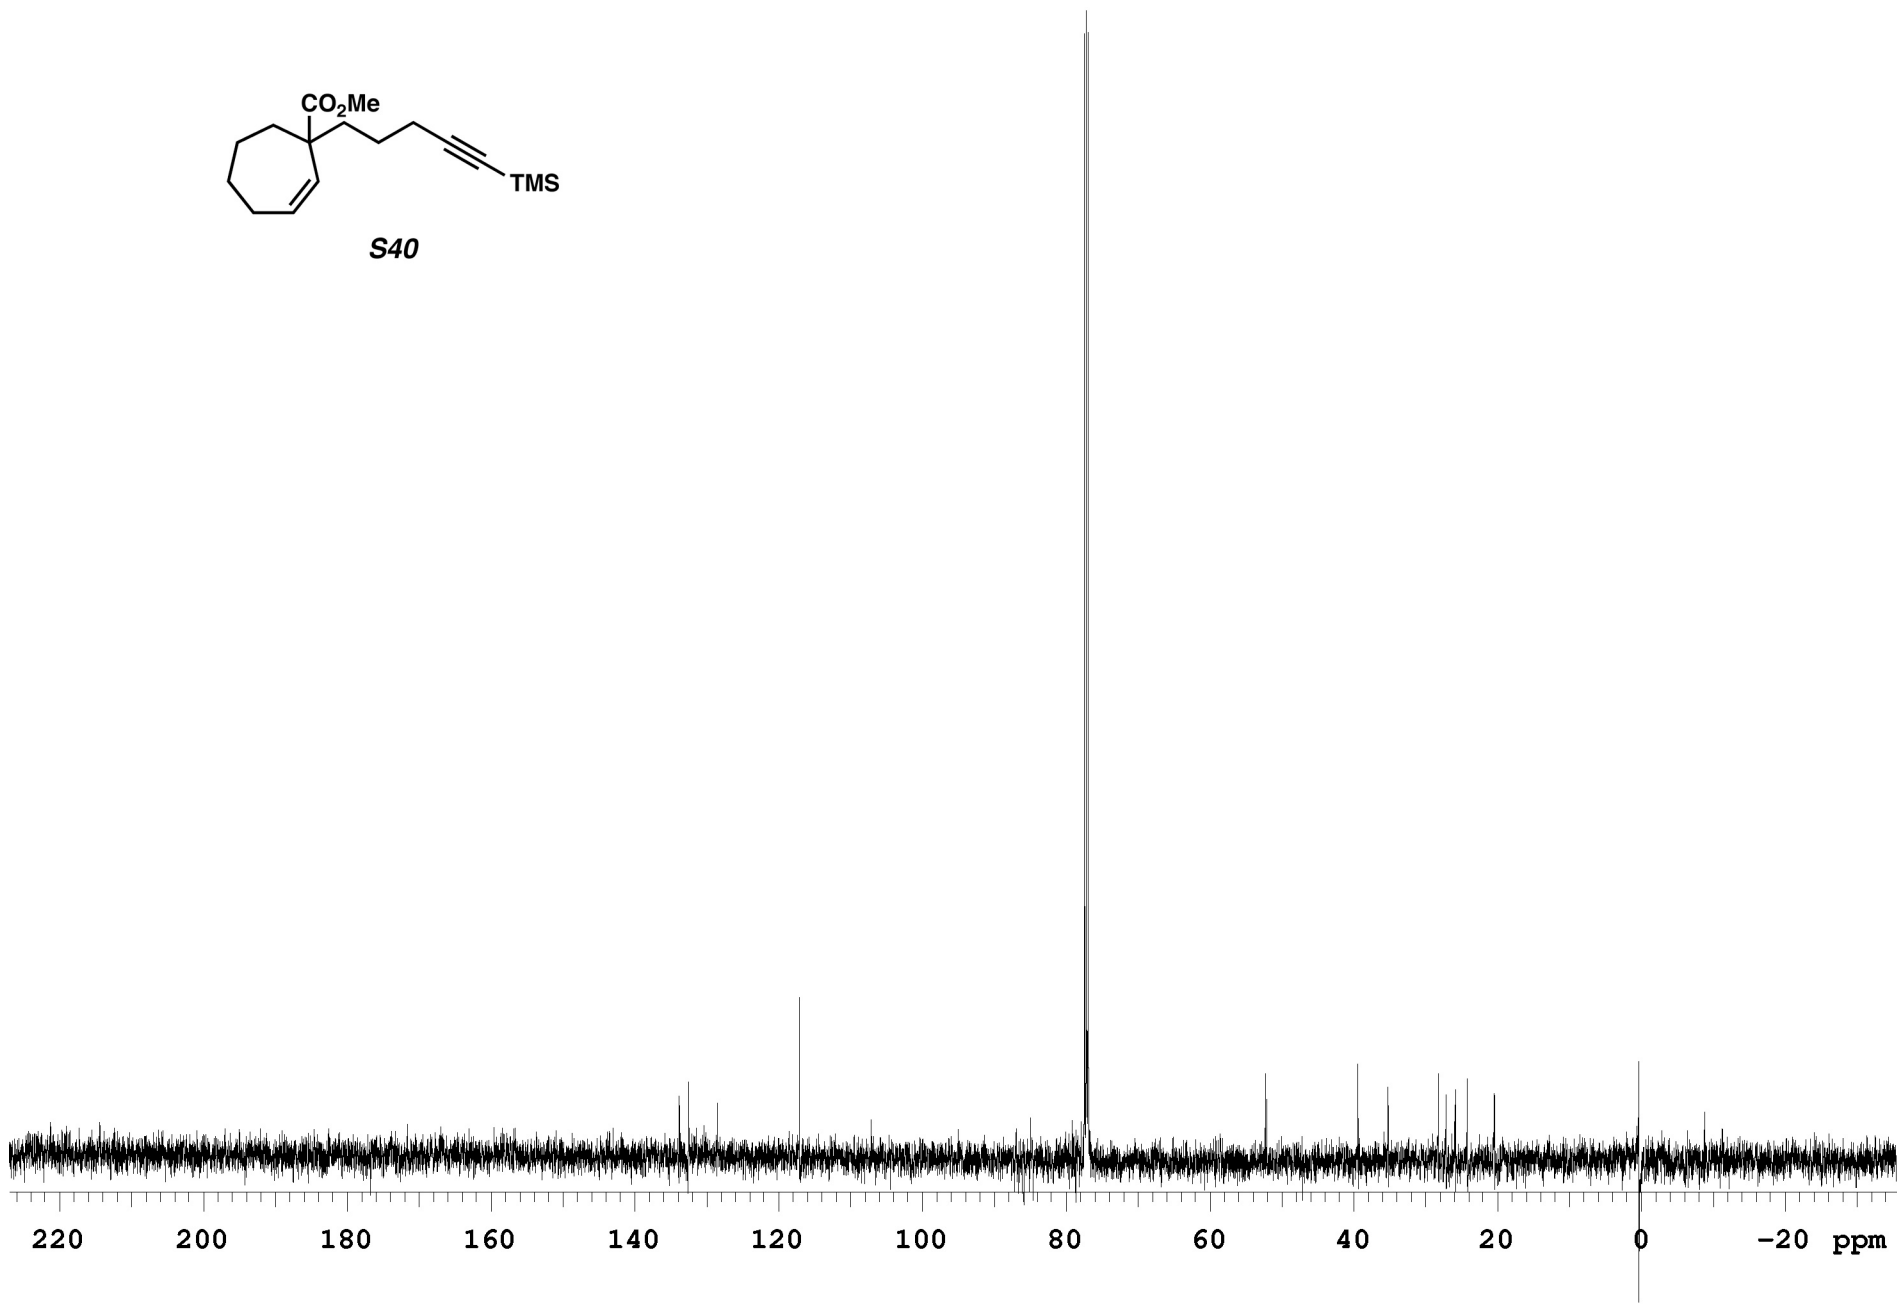

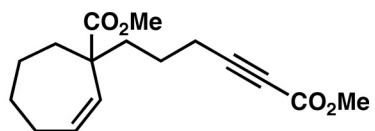

S10

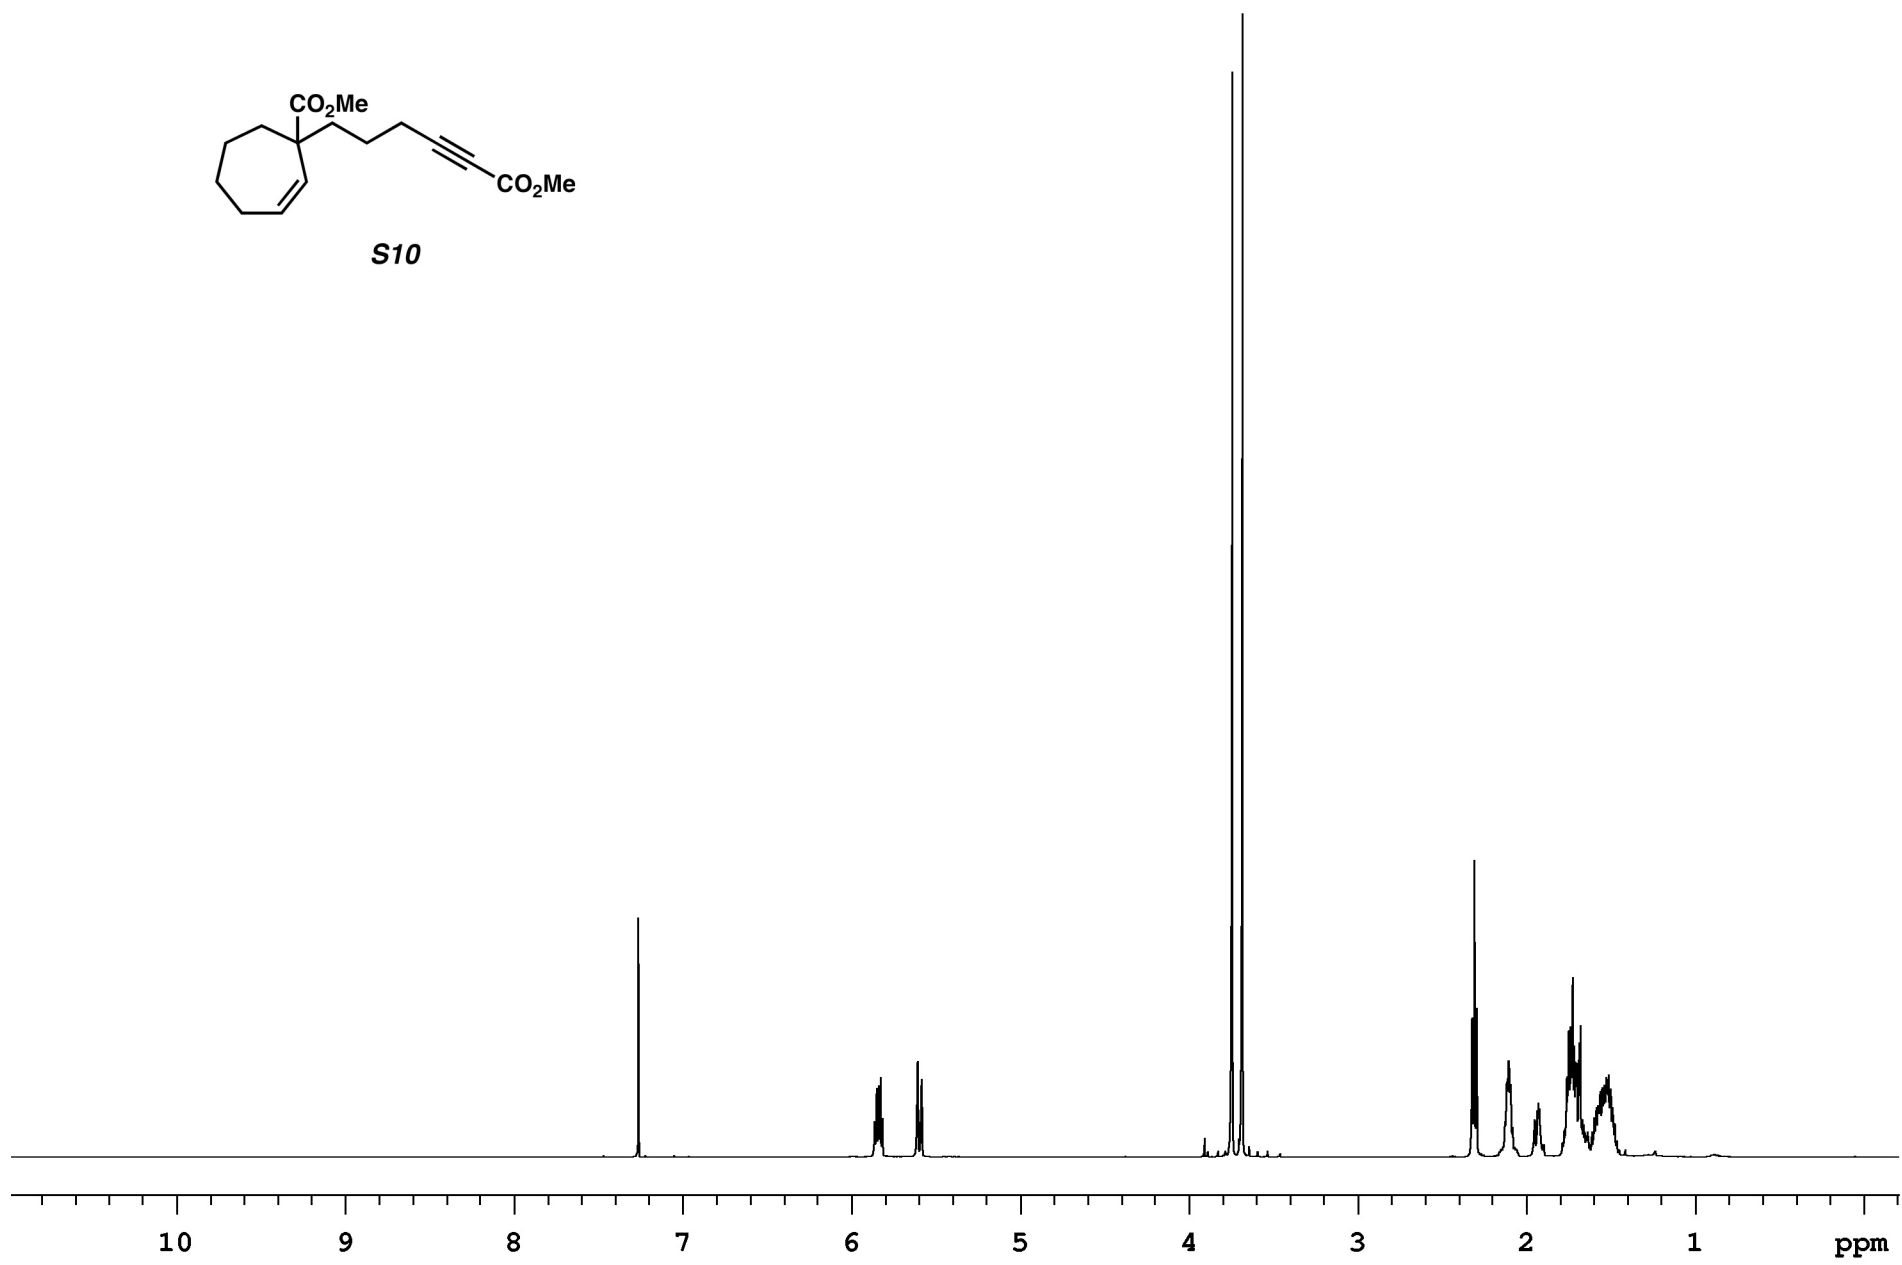

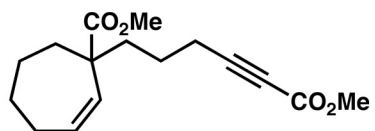

*S10*

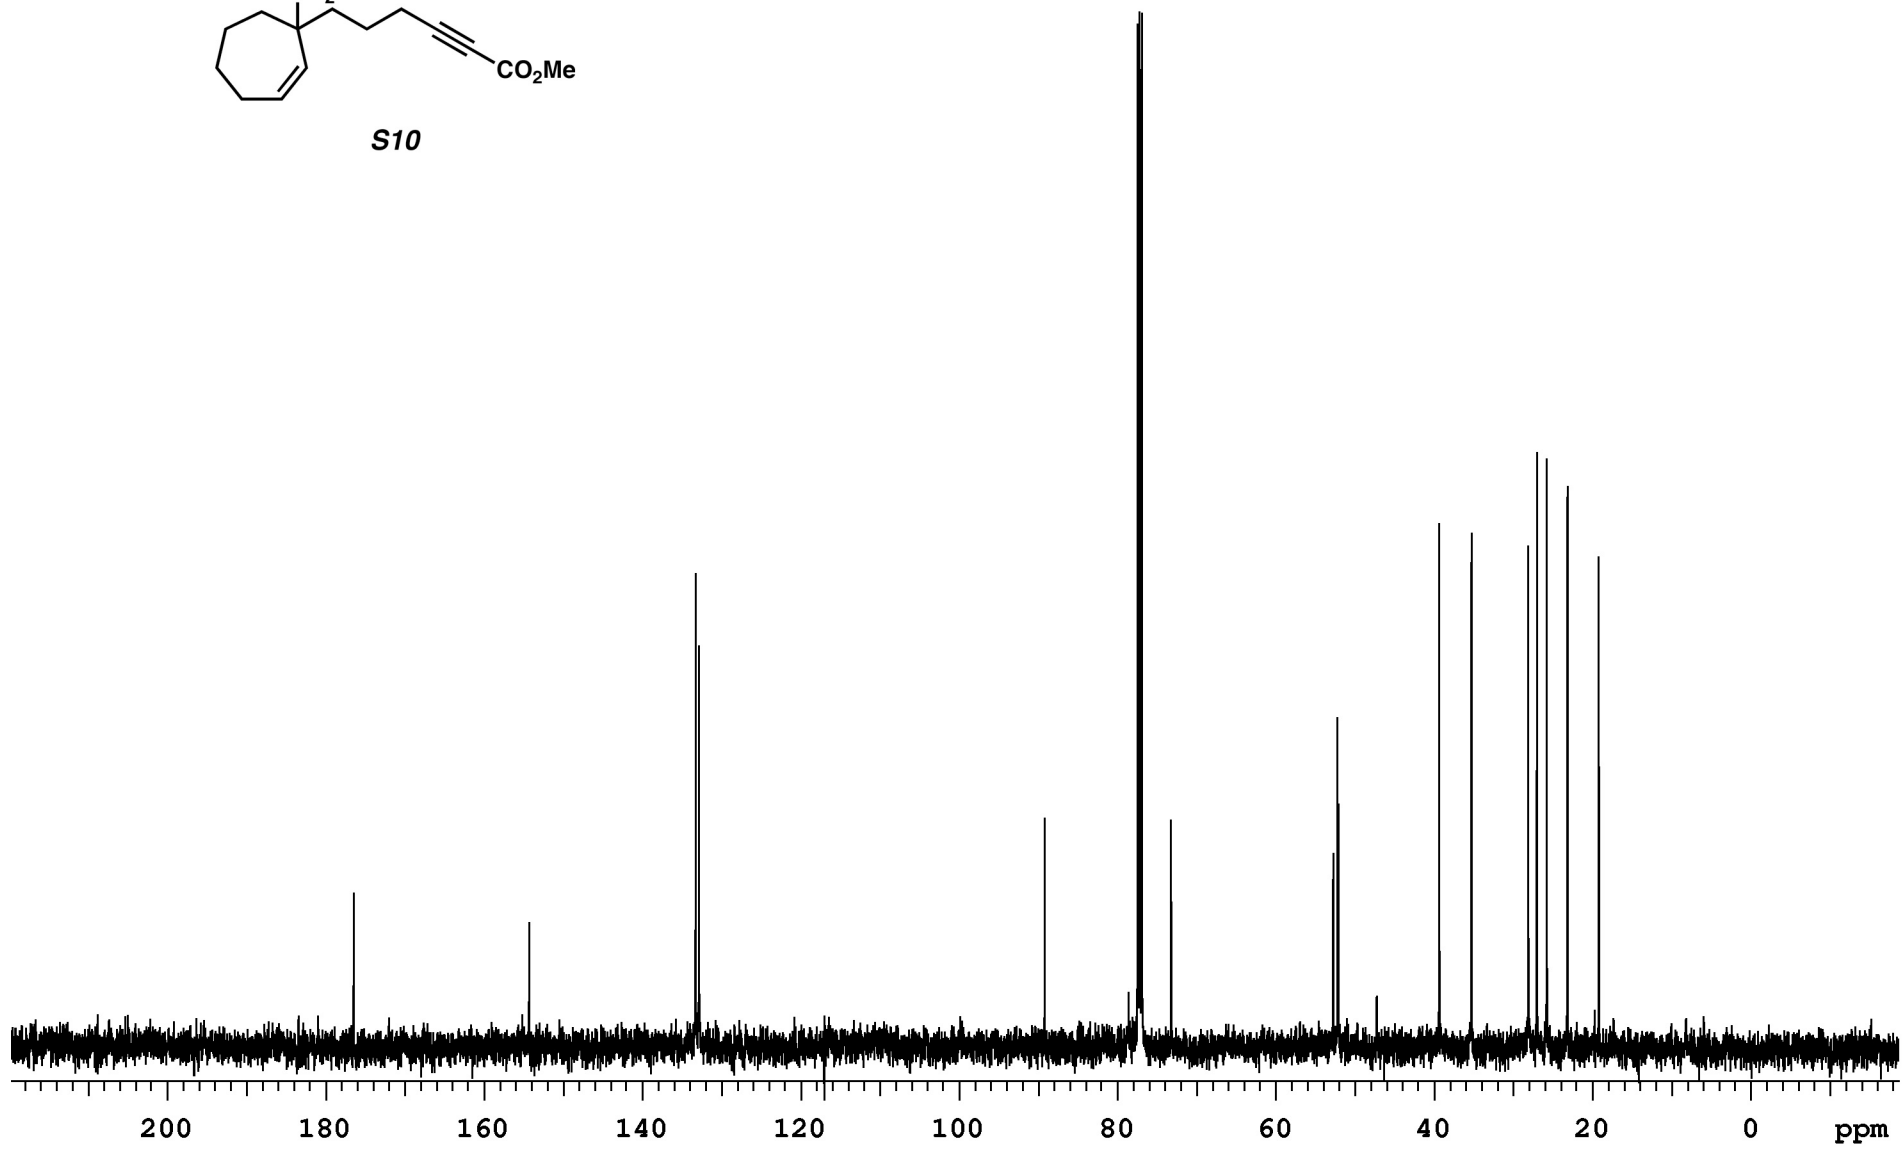



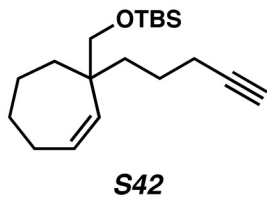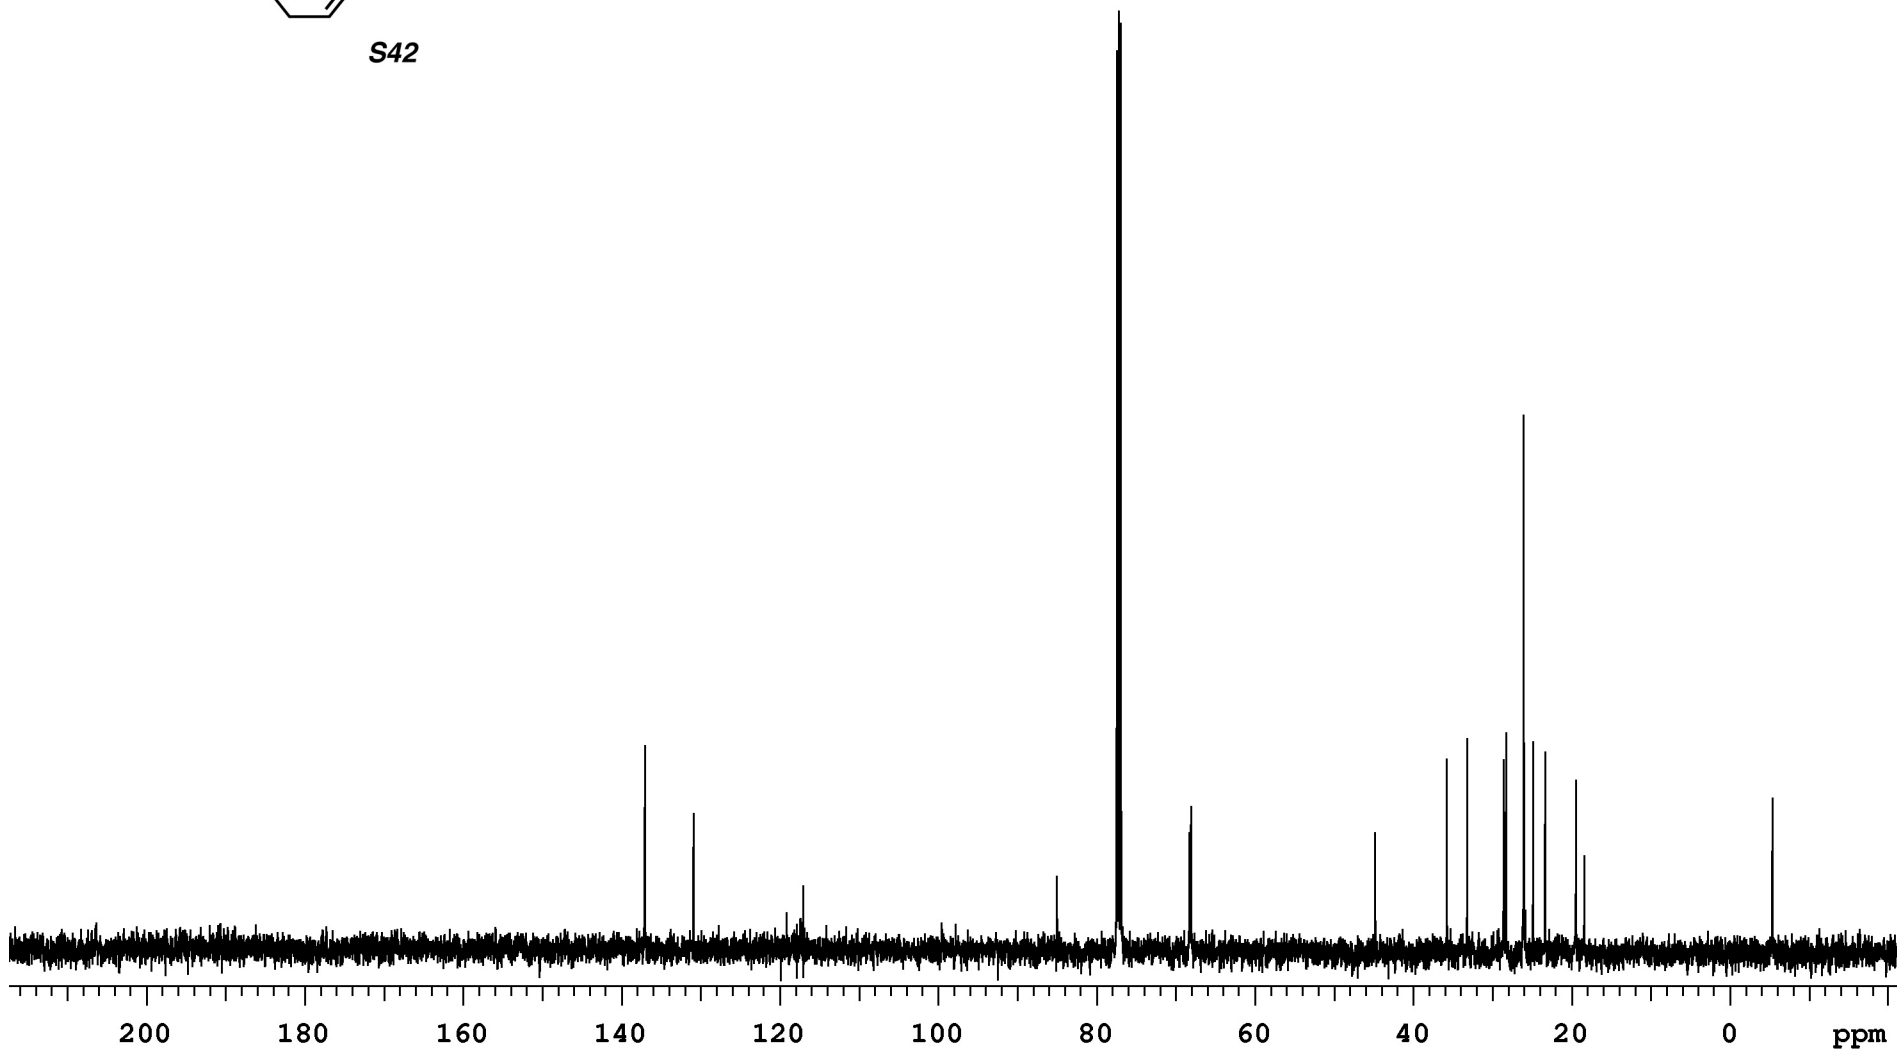

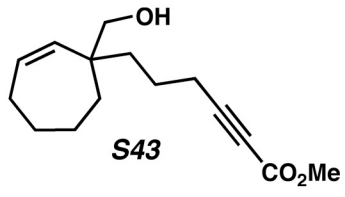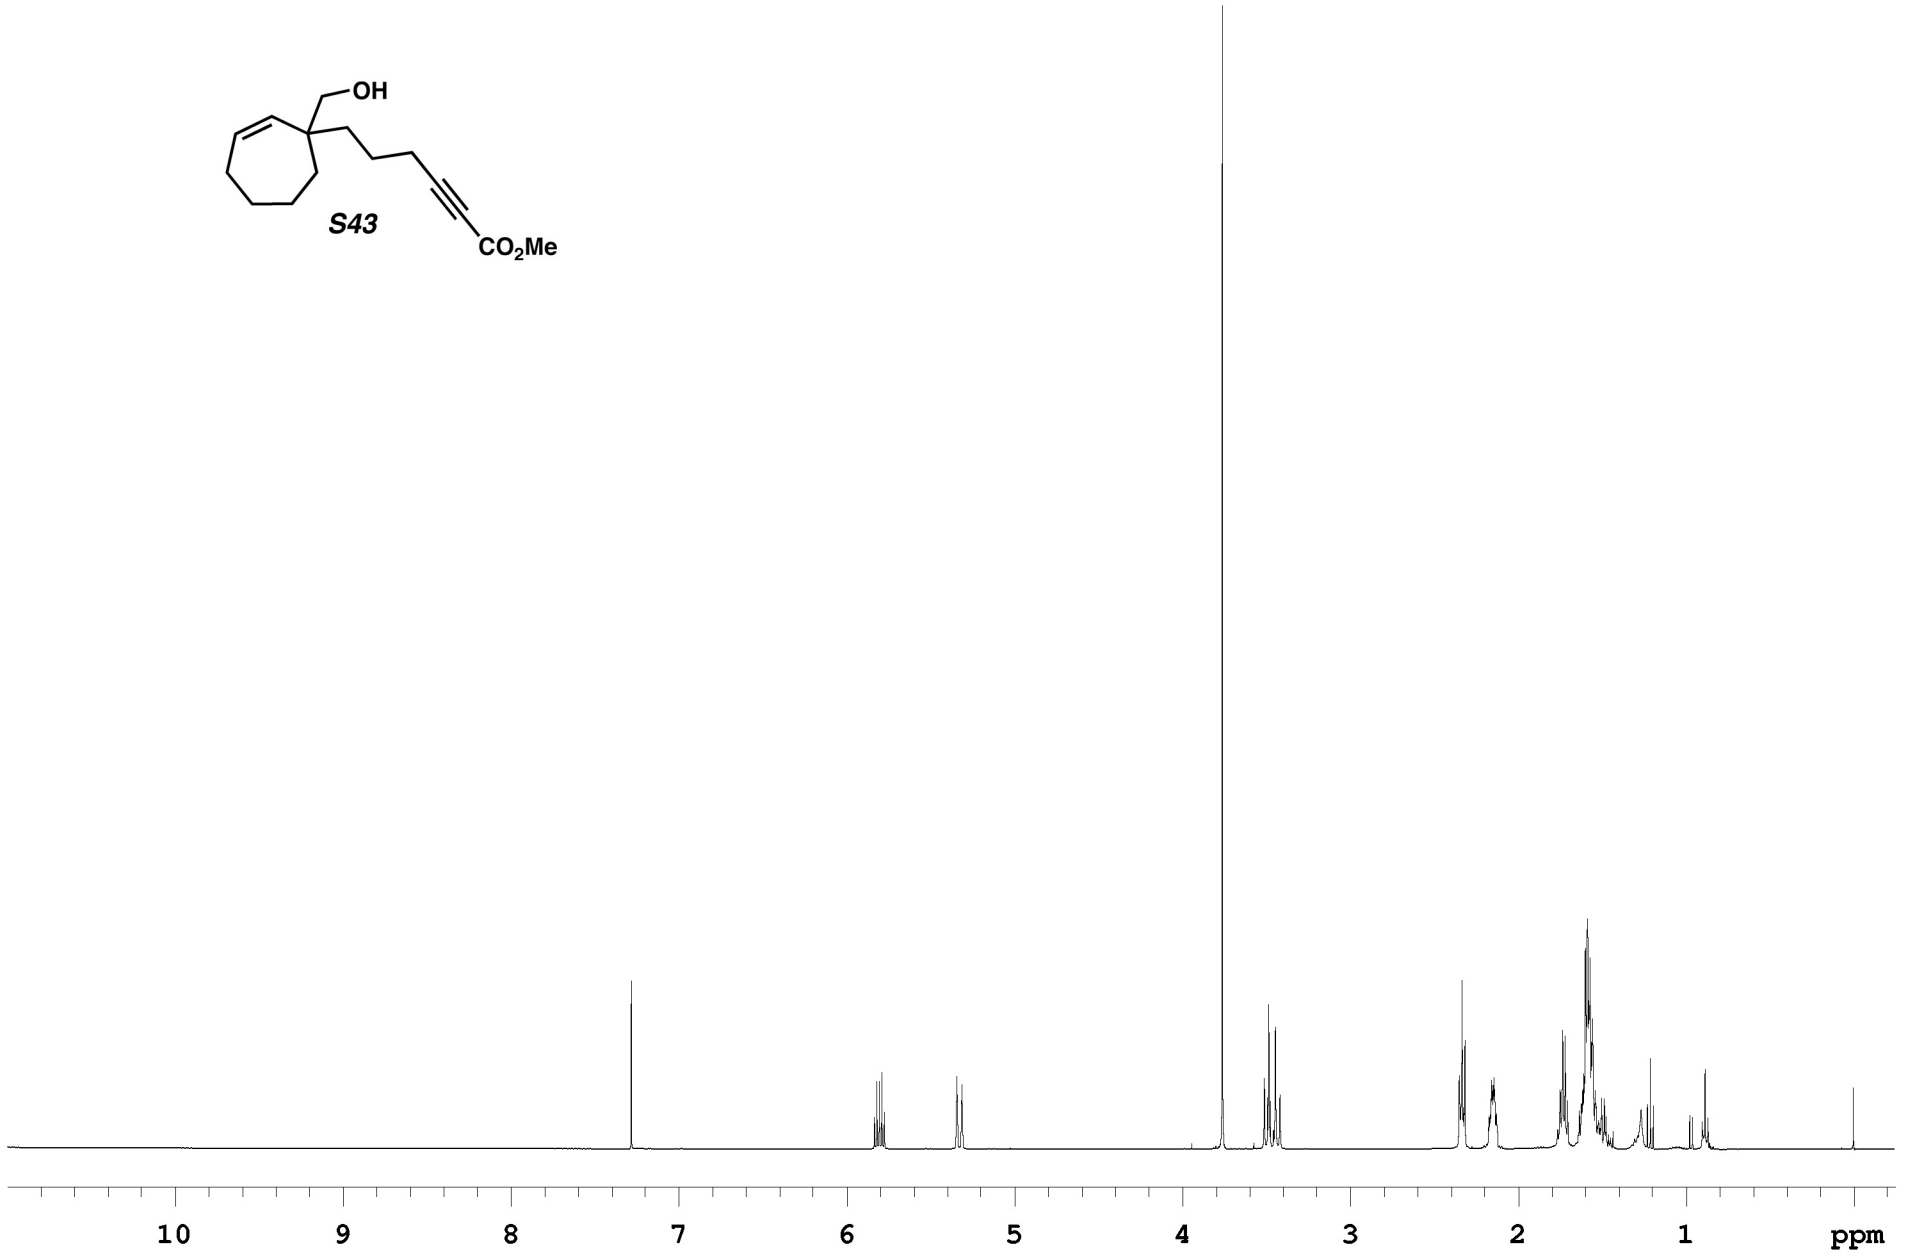

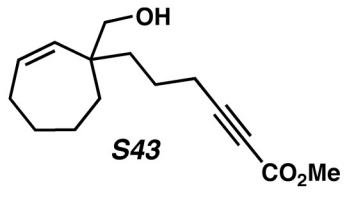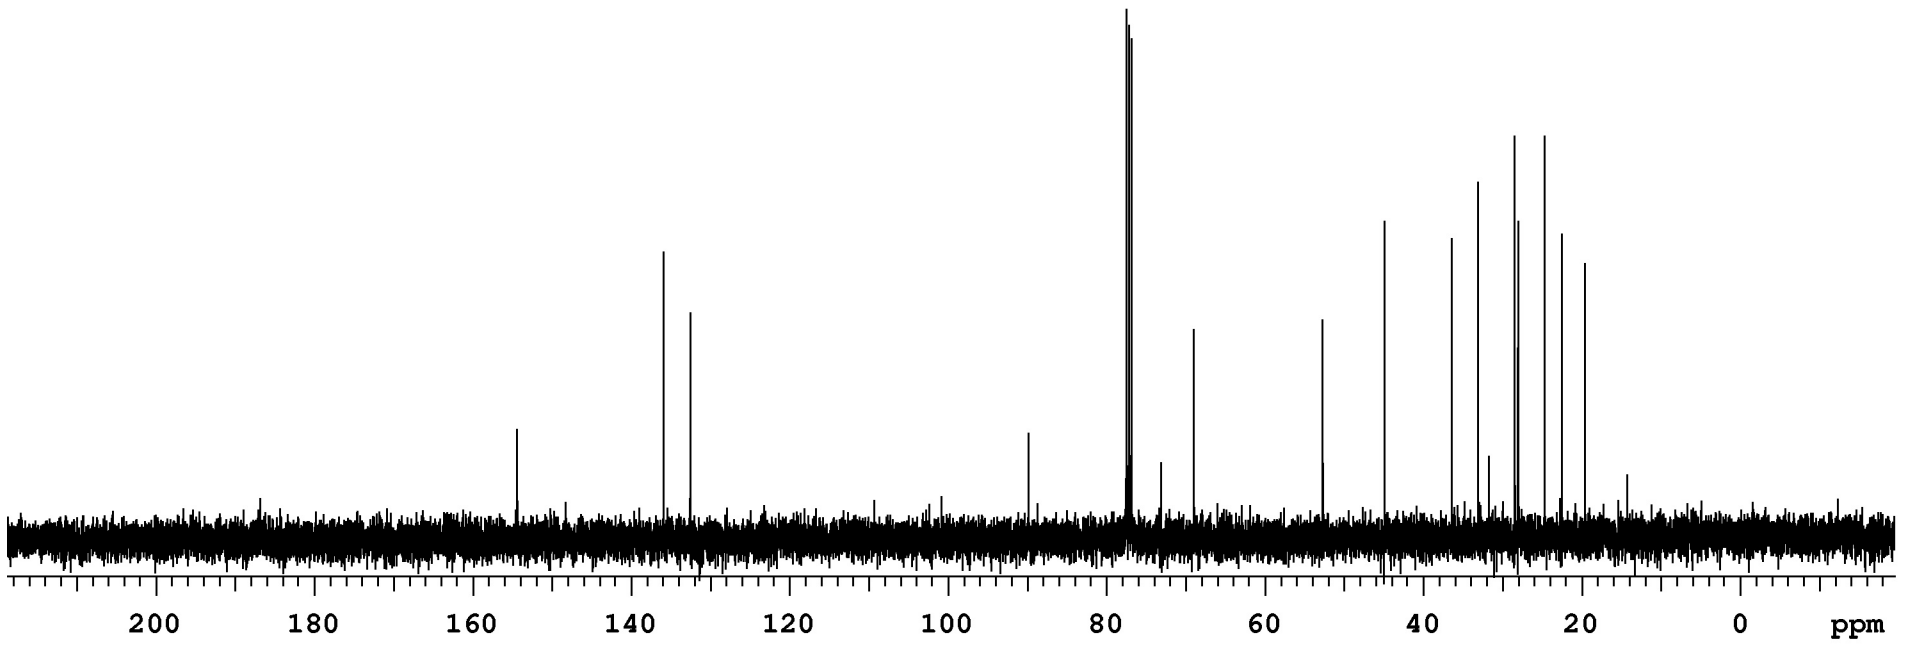



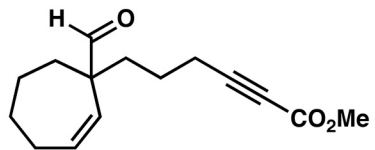

S12

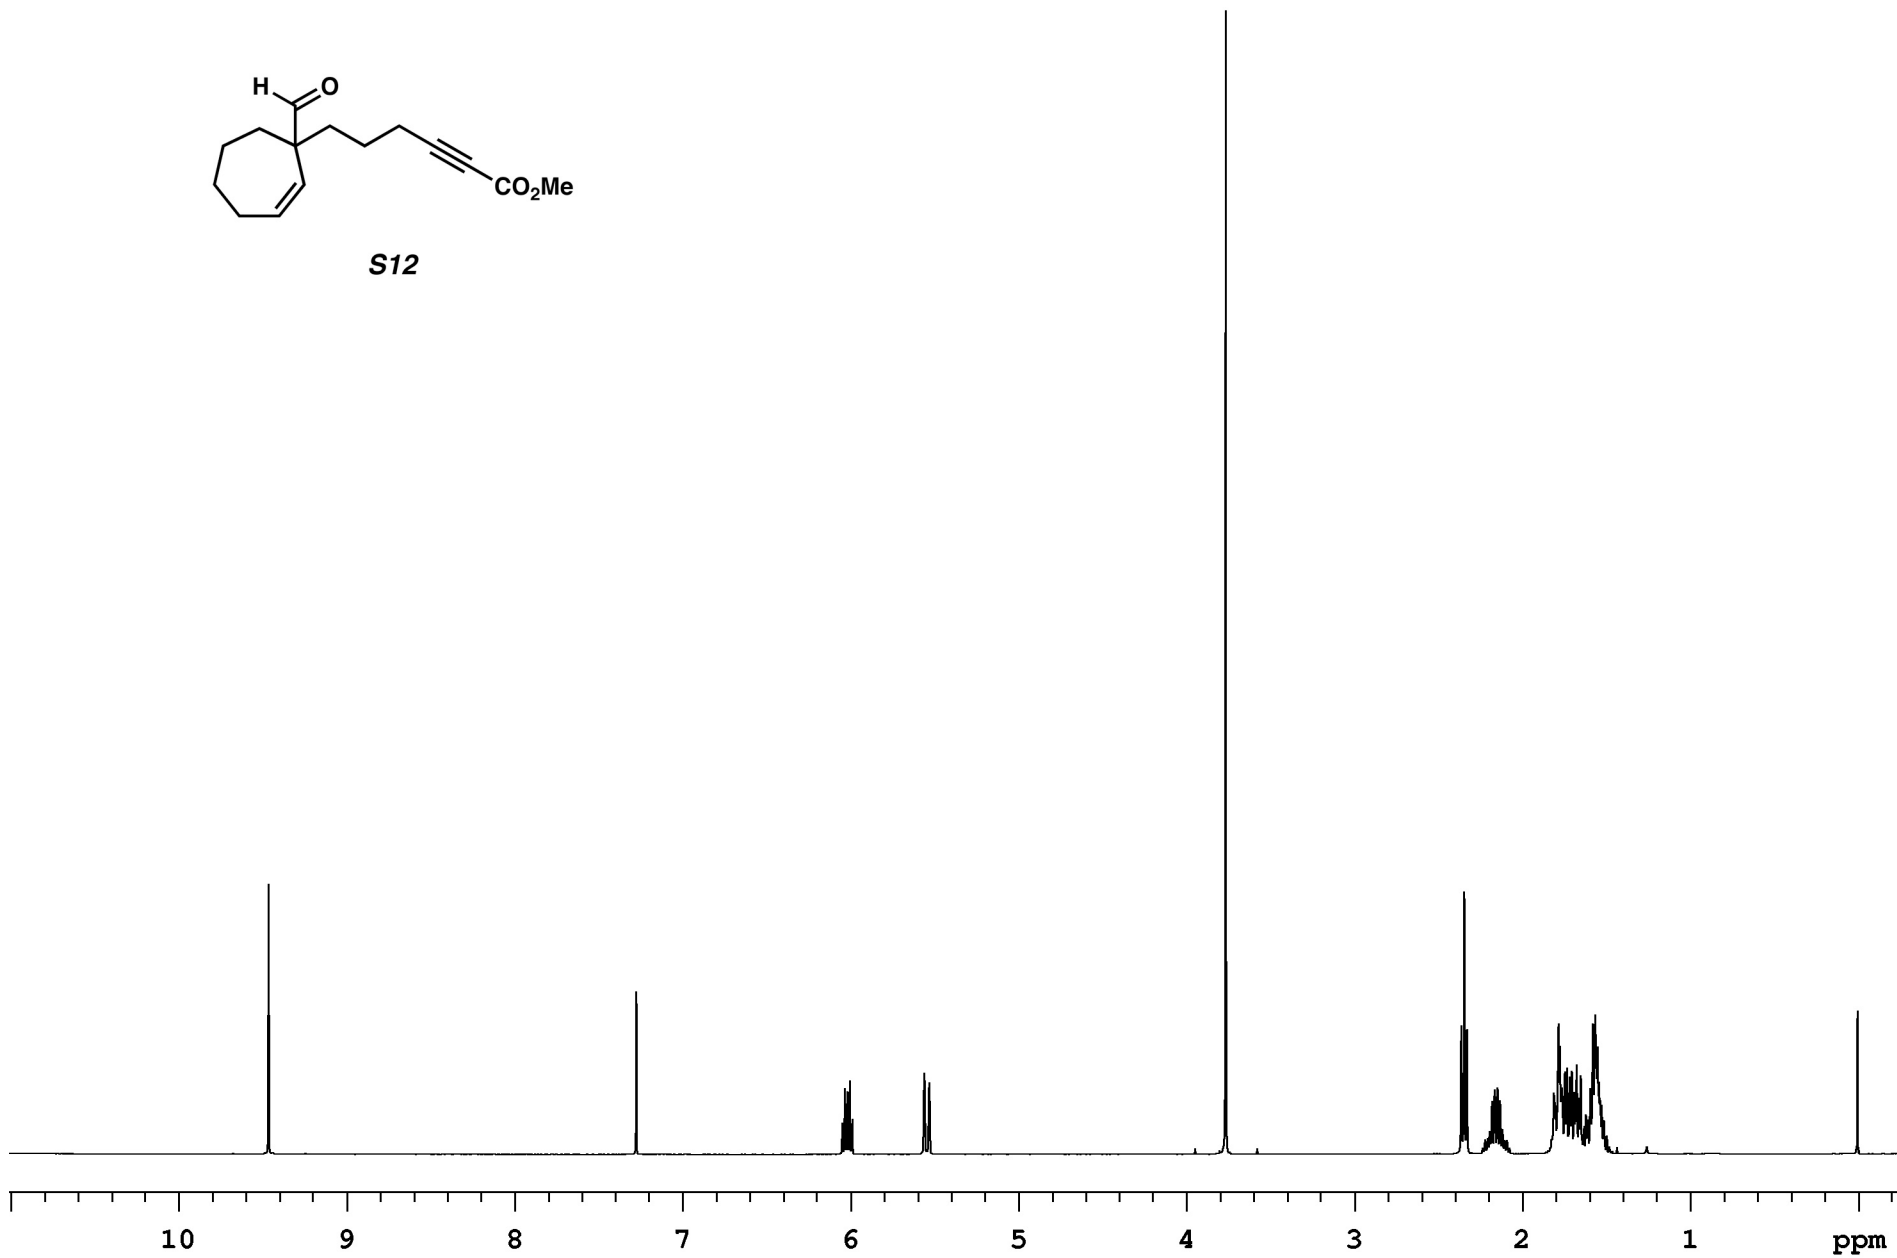



S12

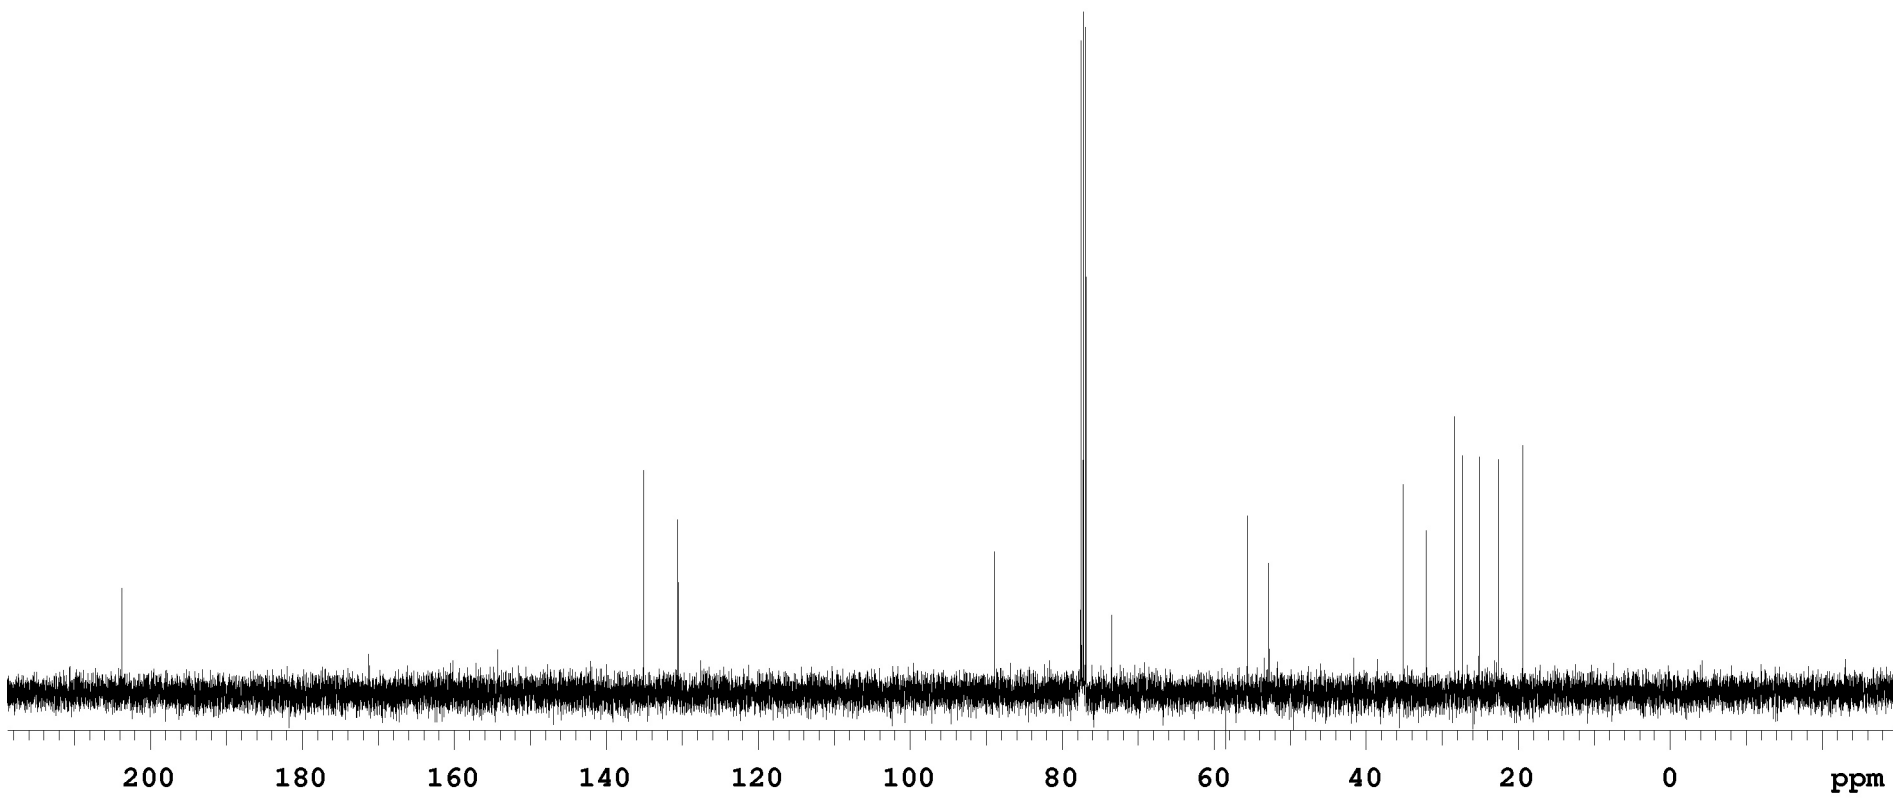

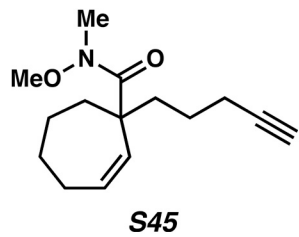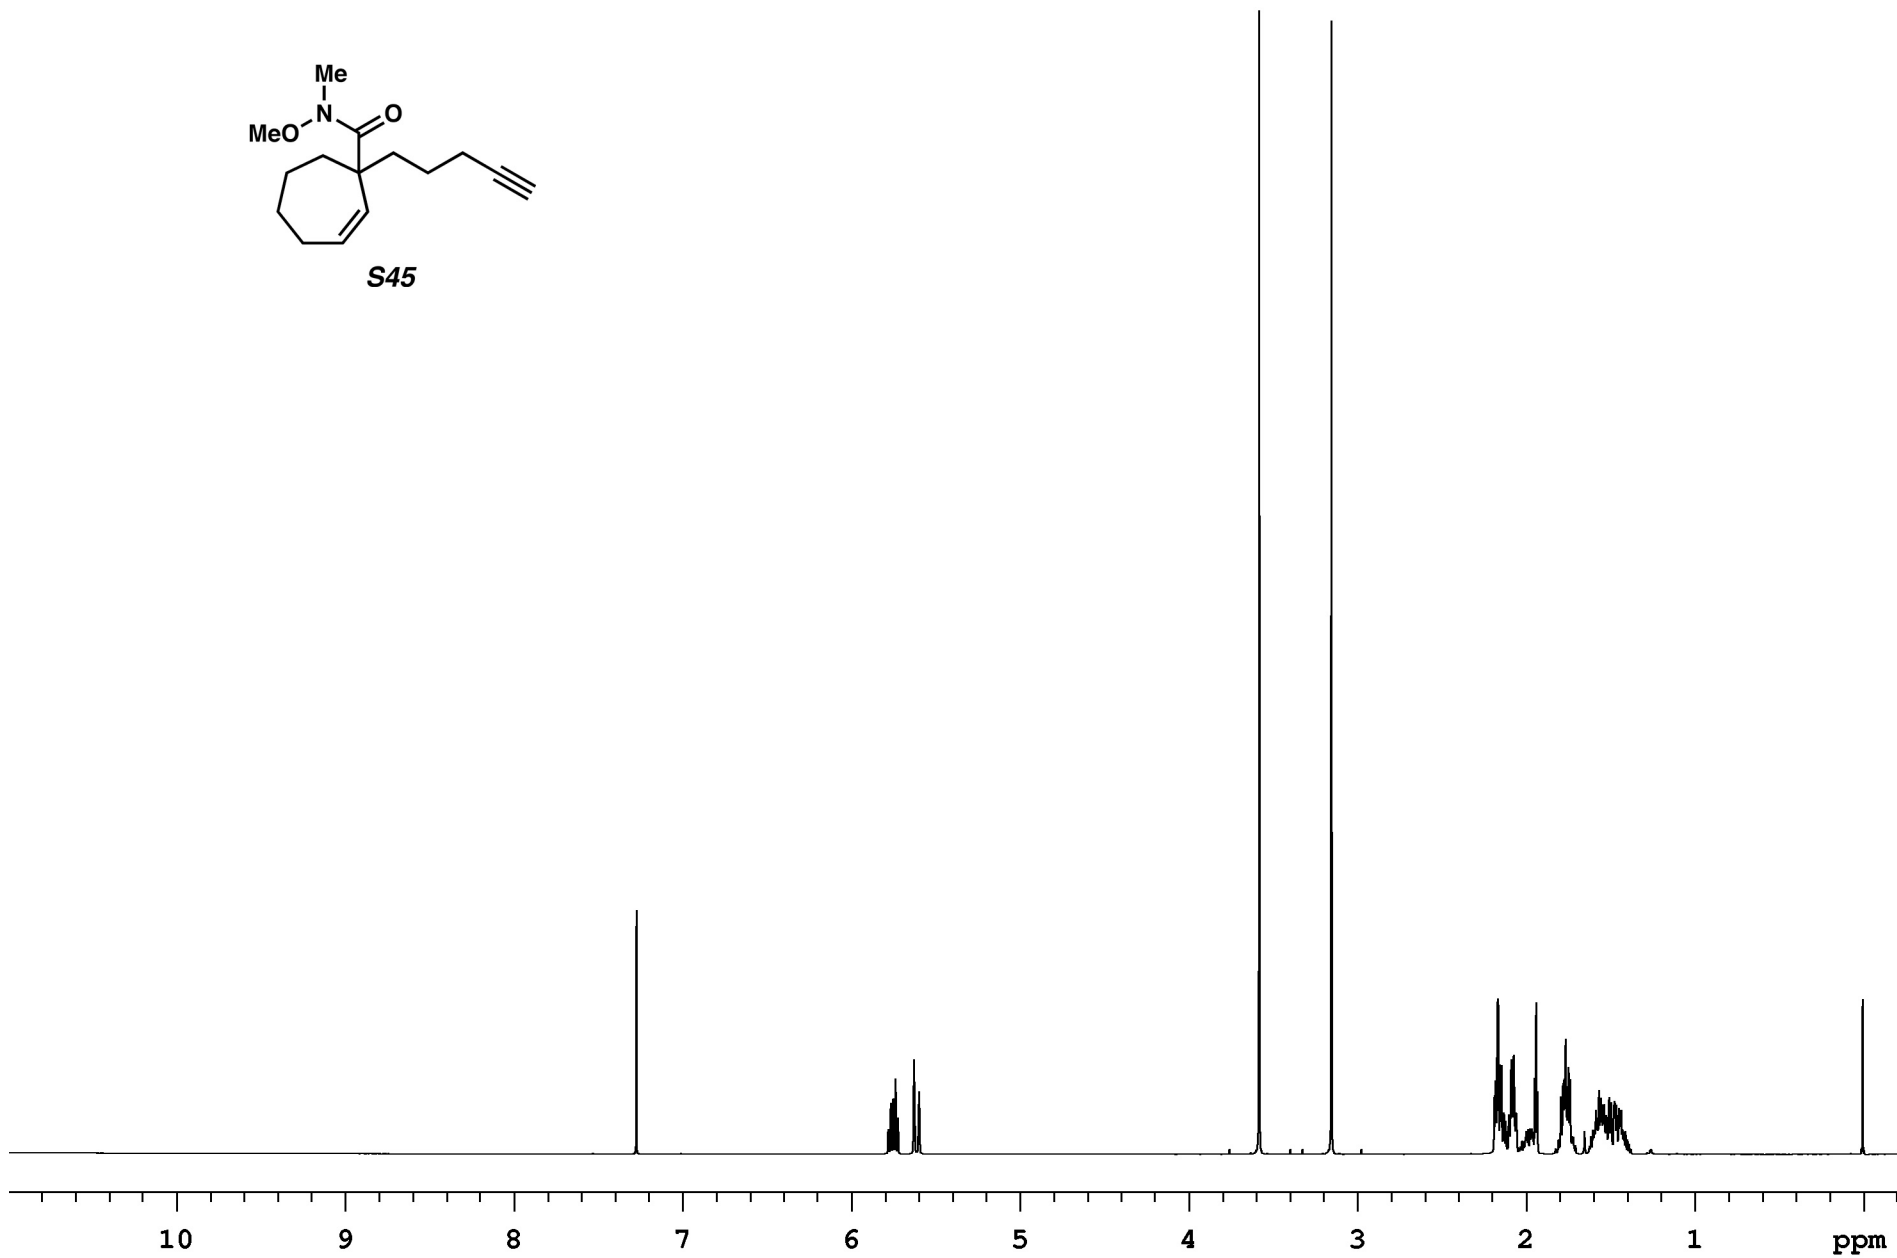

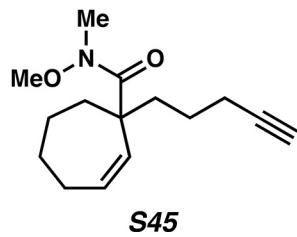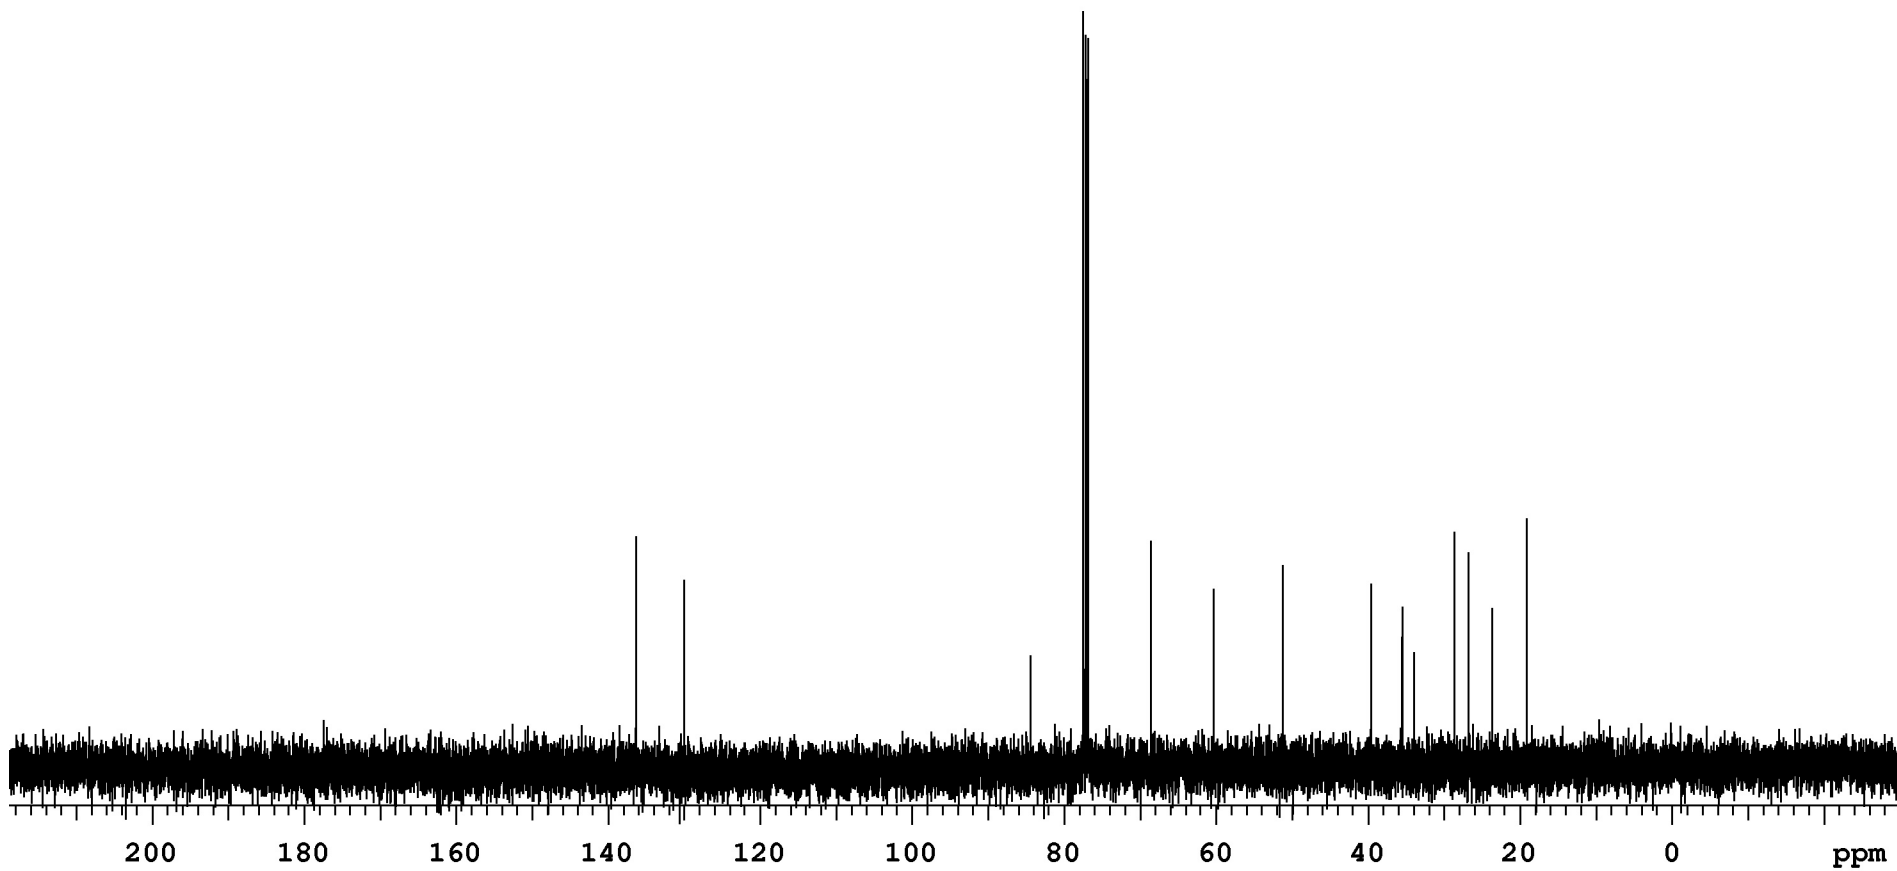

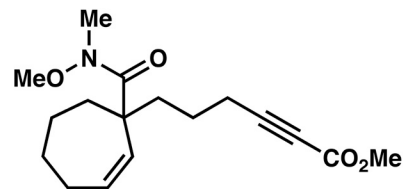

S14

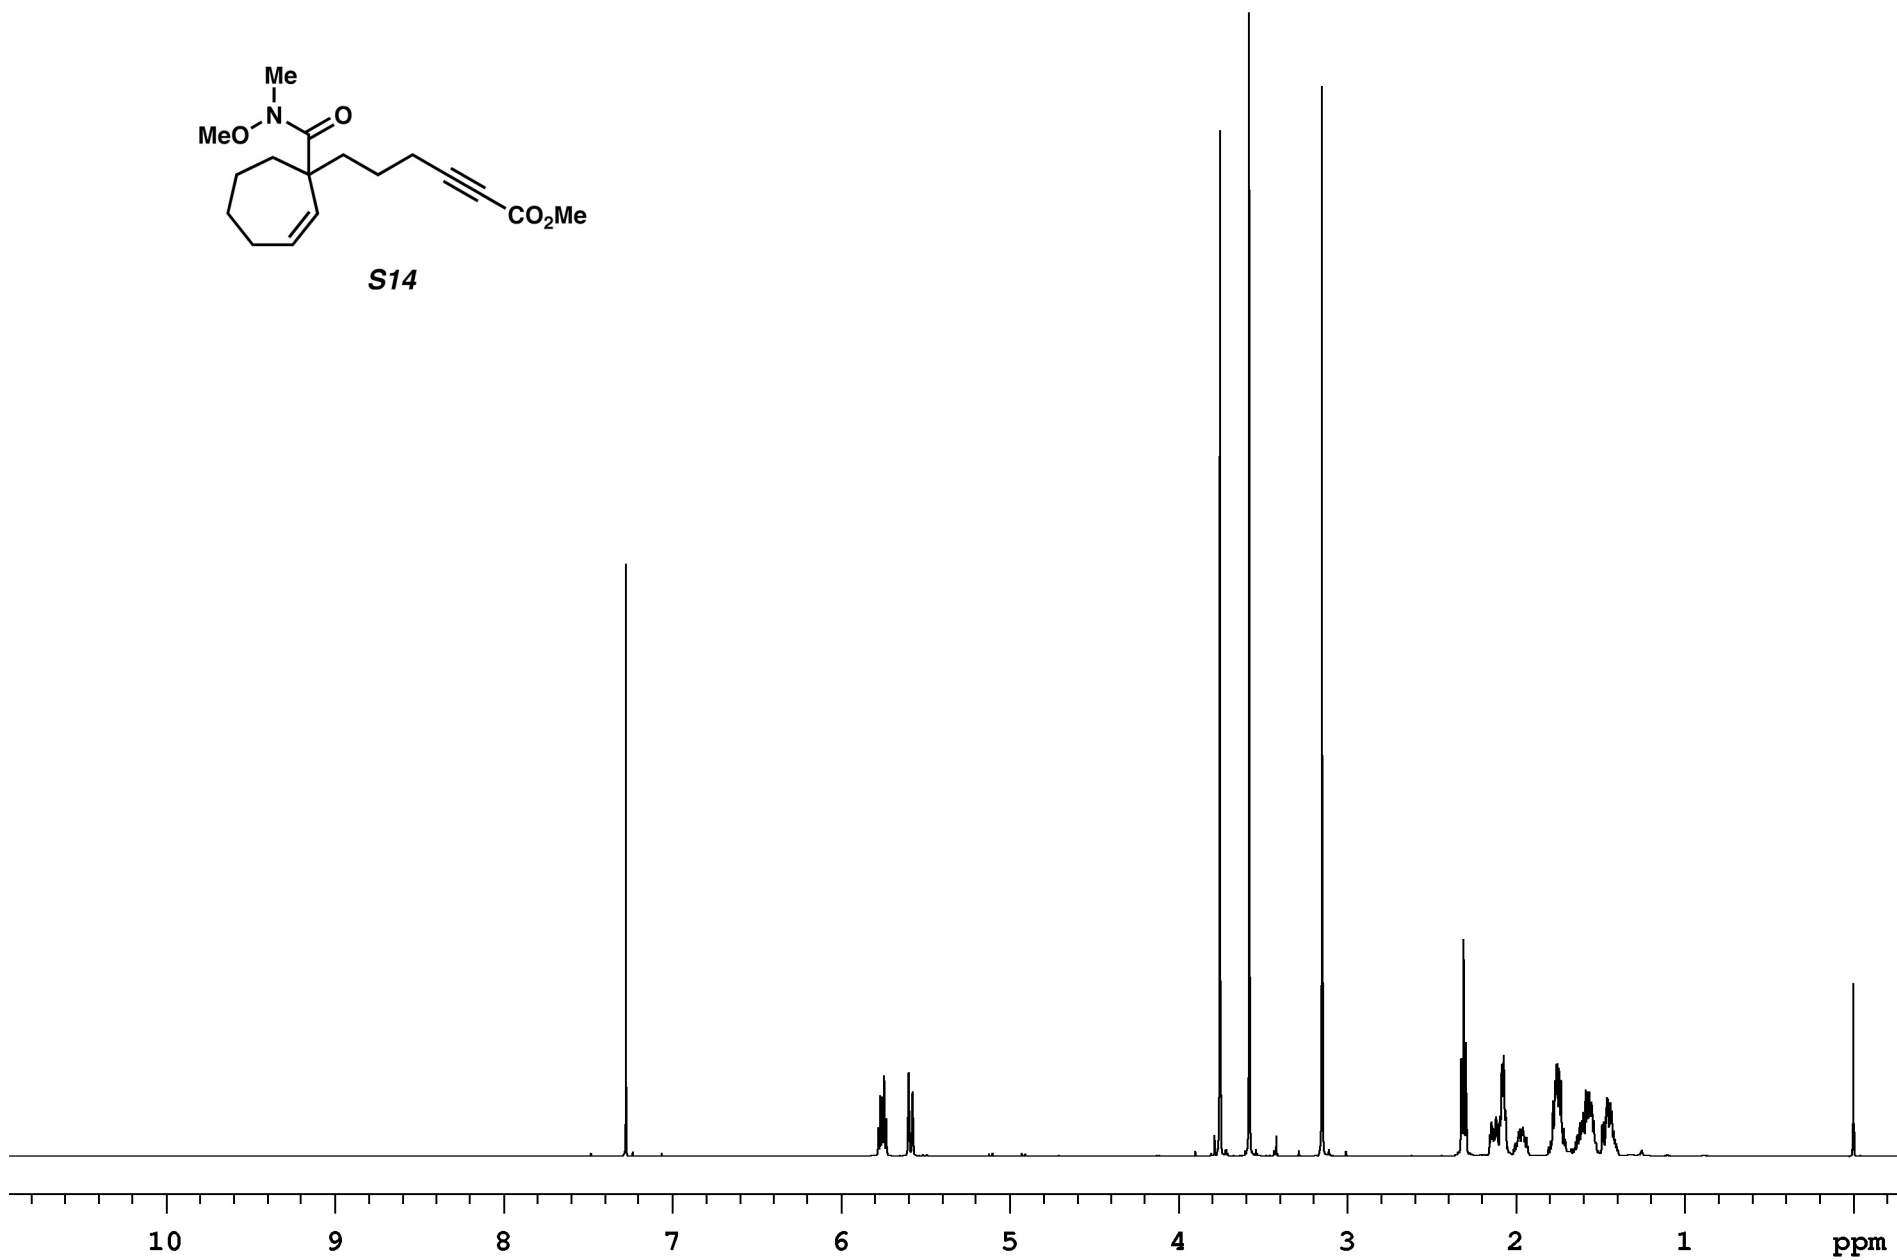

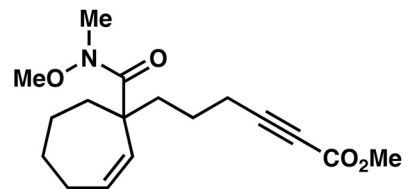

S14

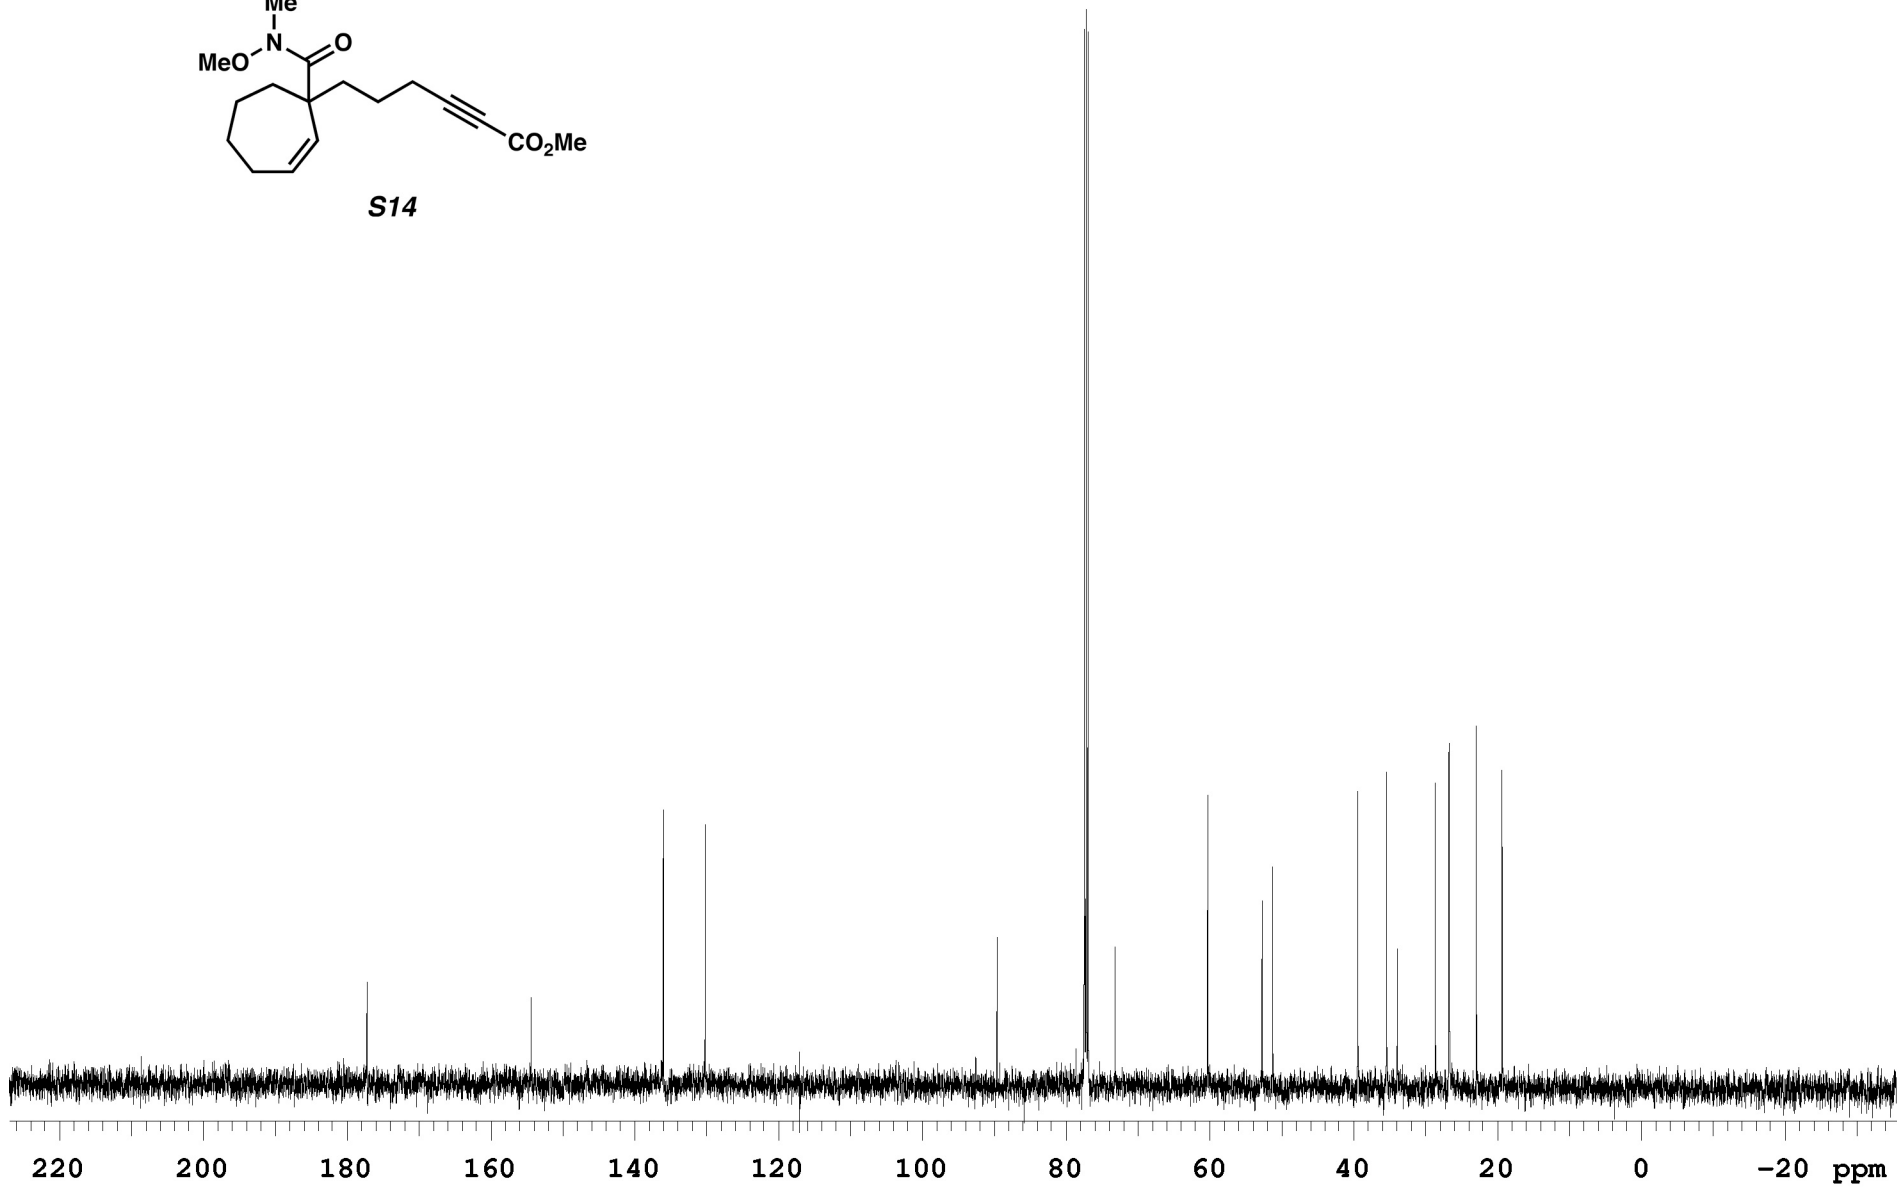

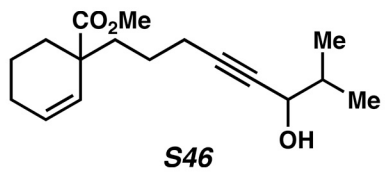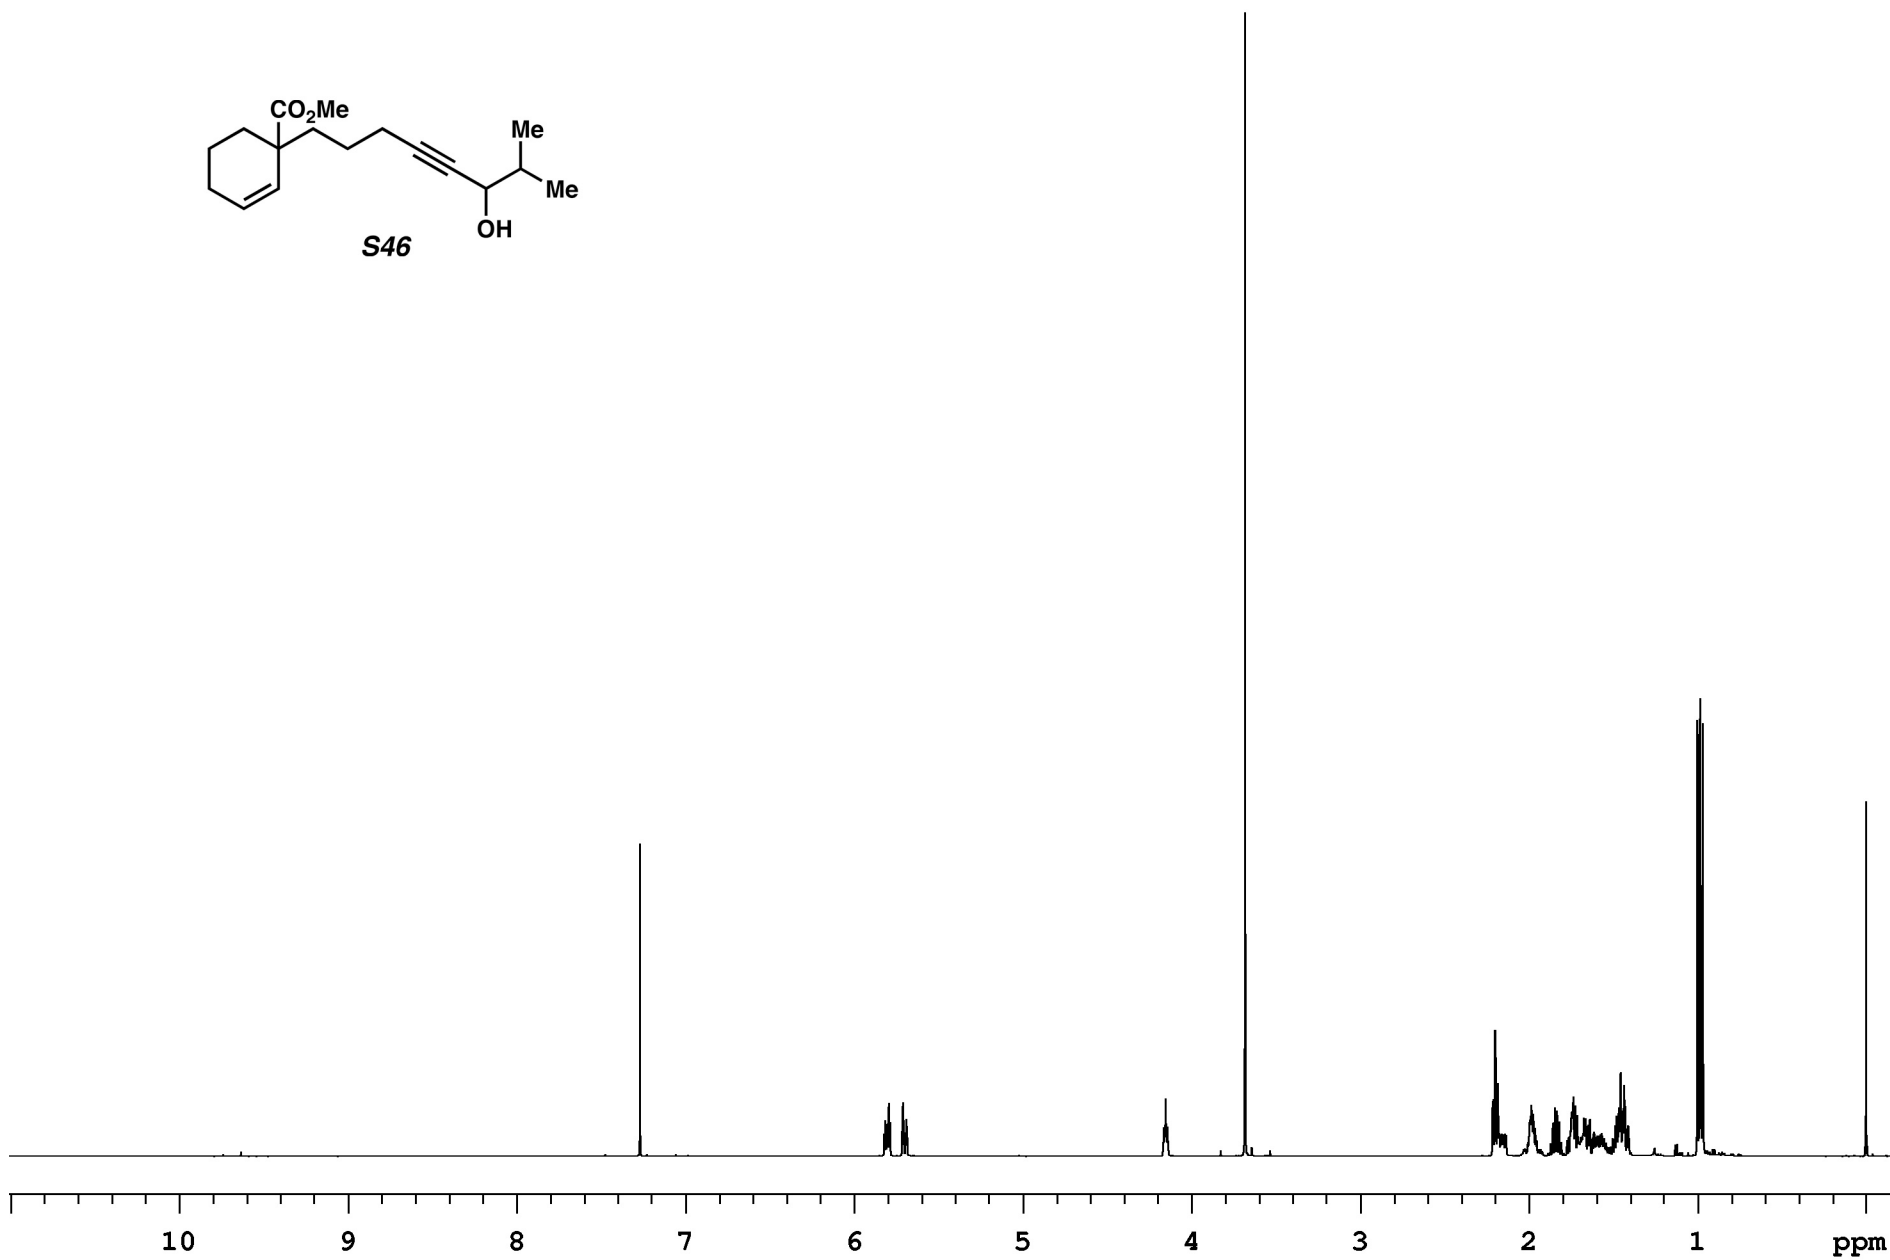

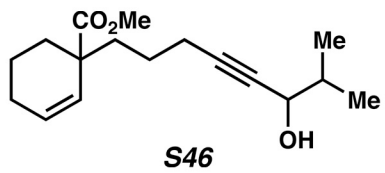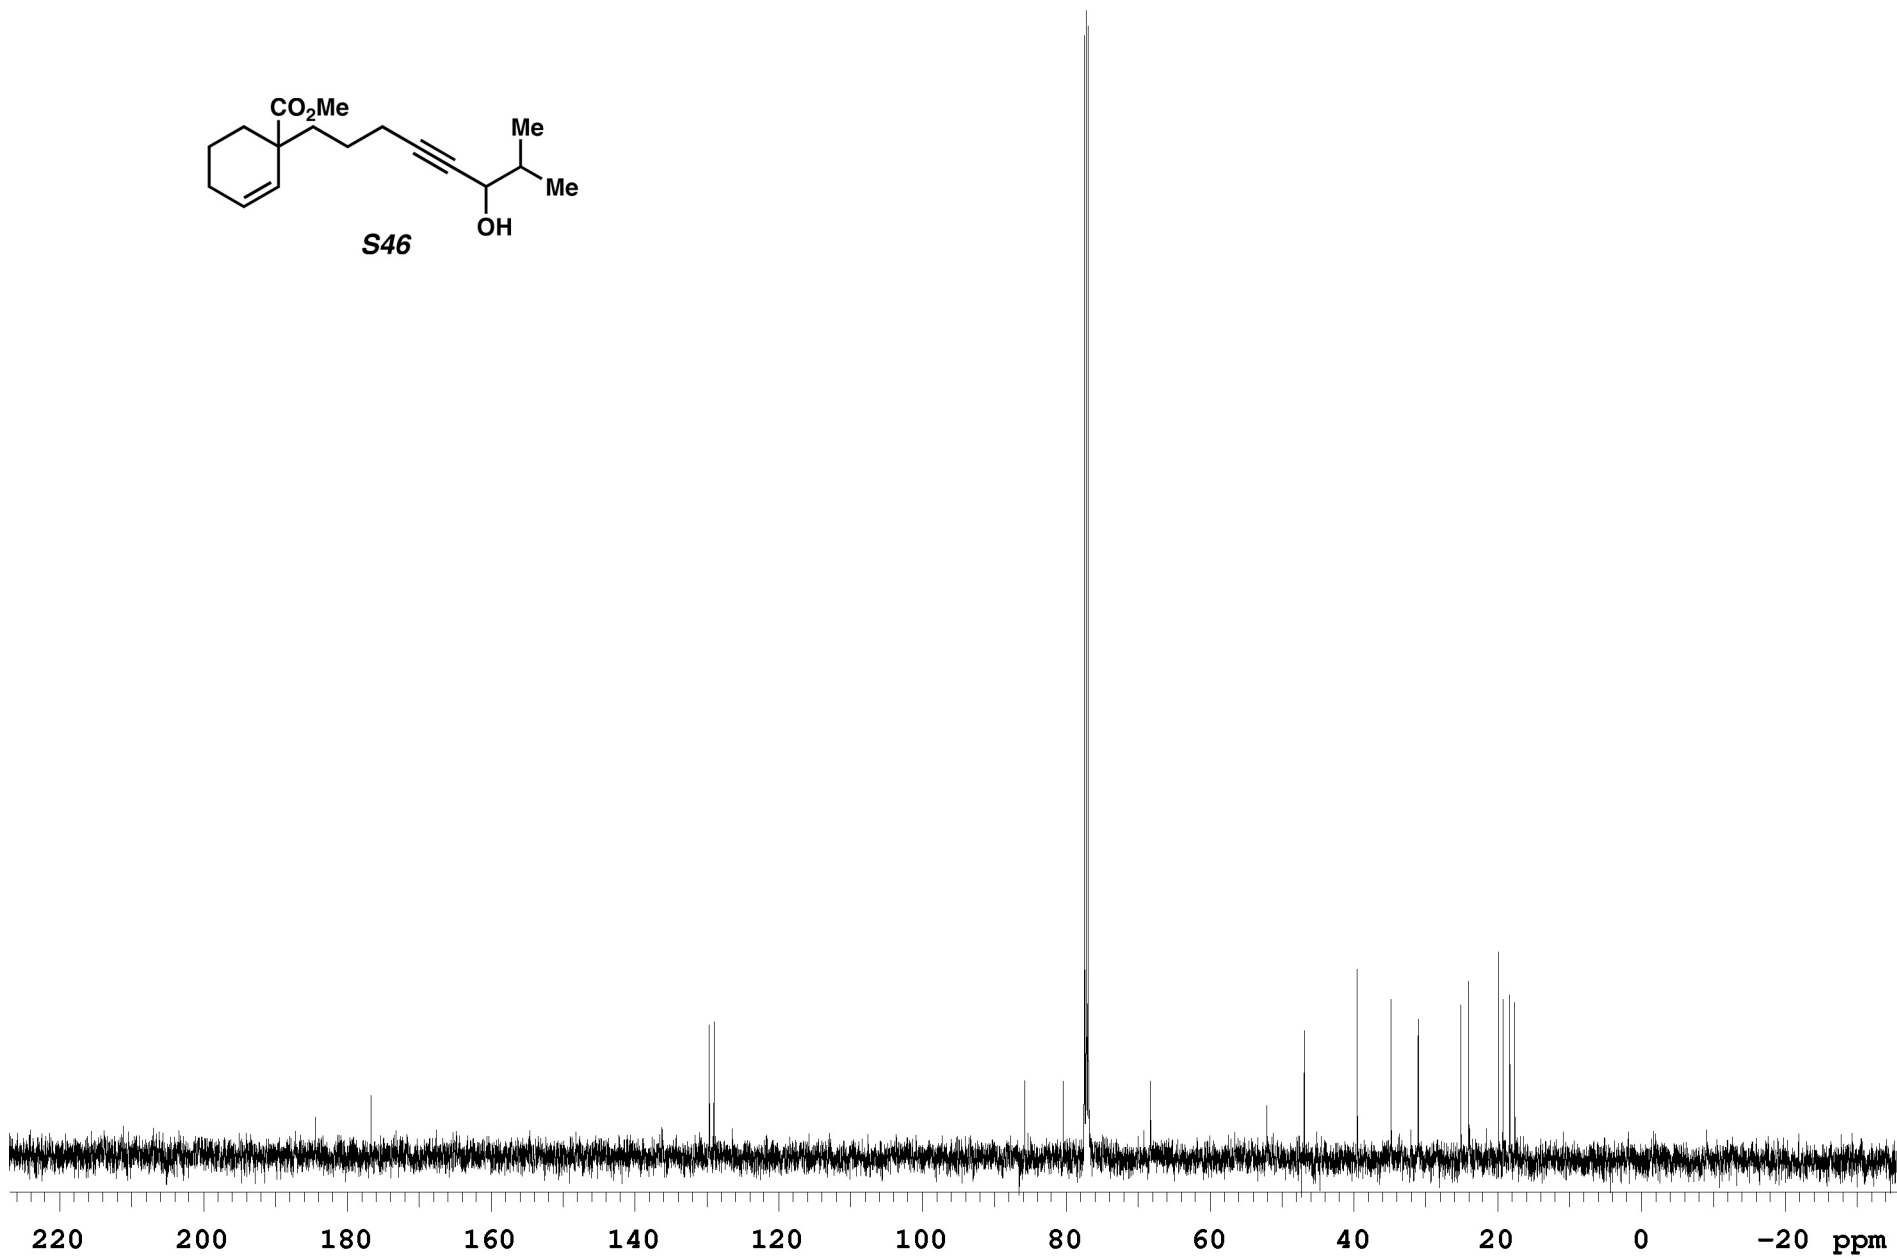



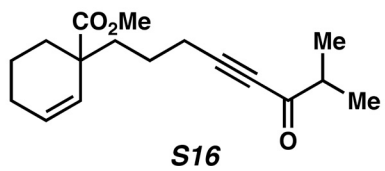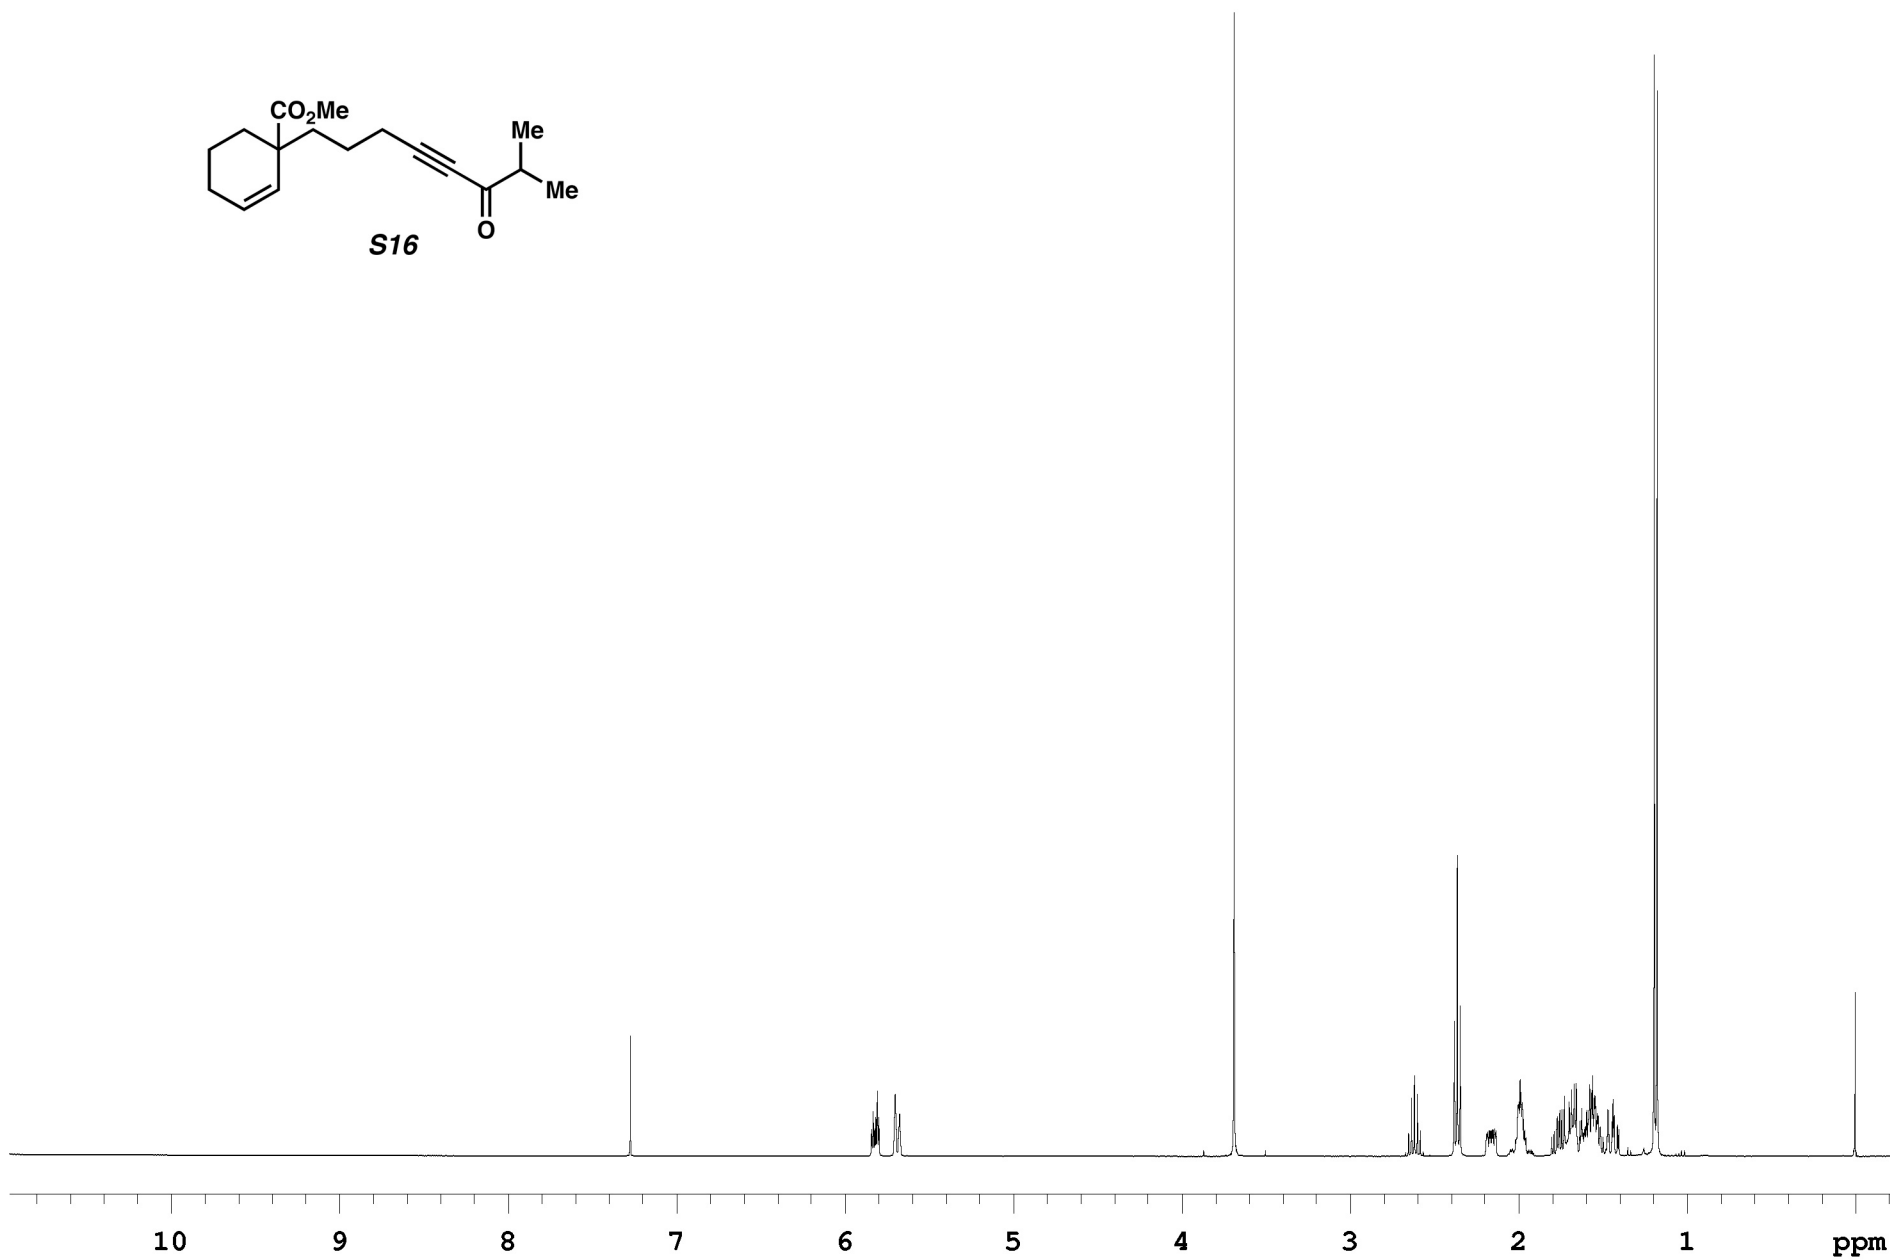

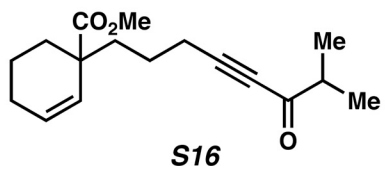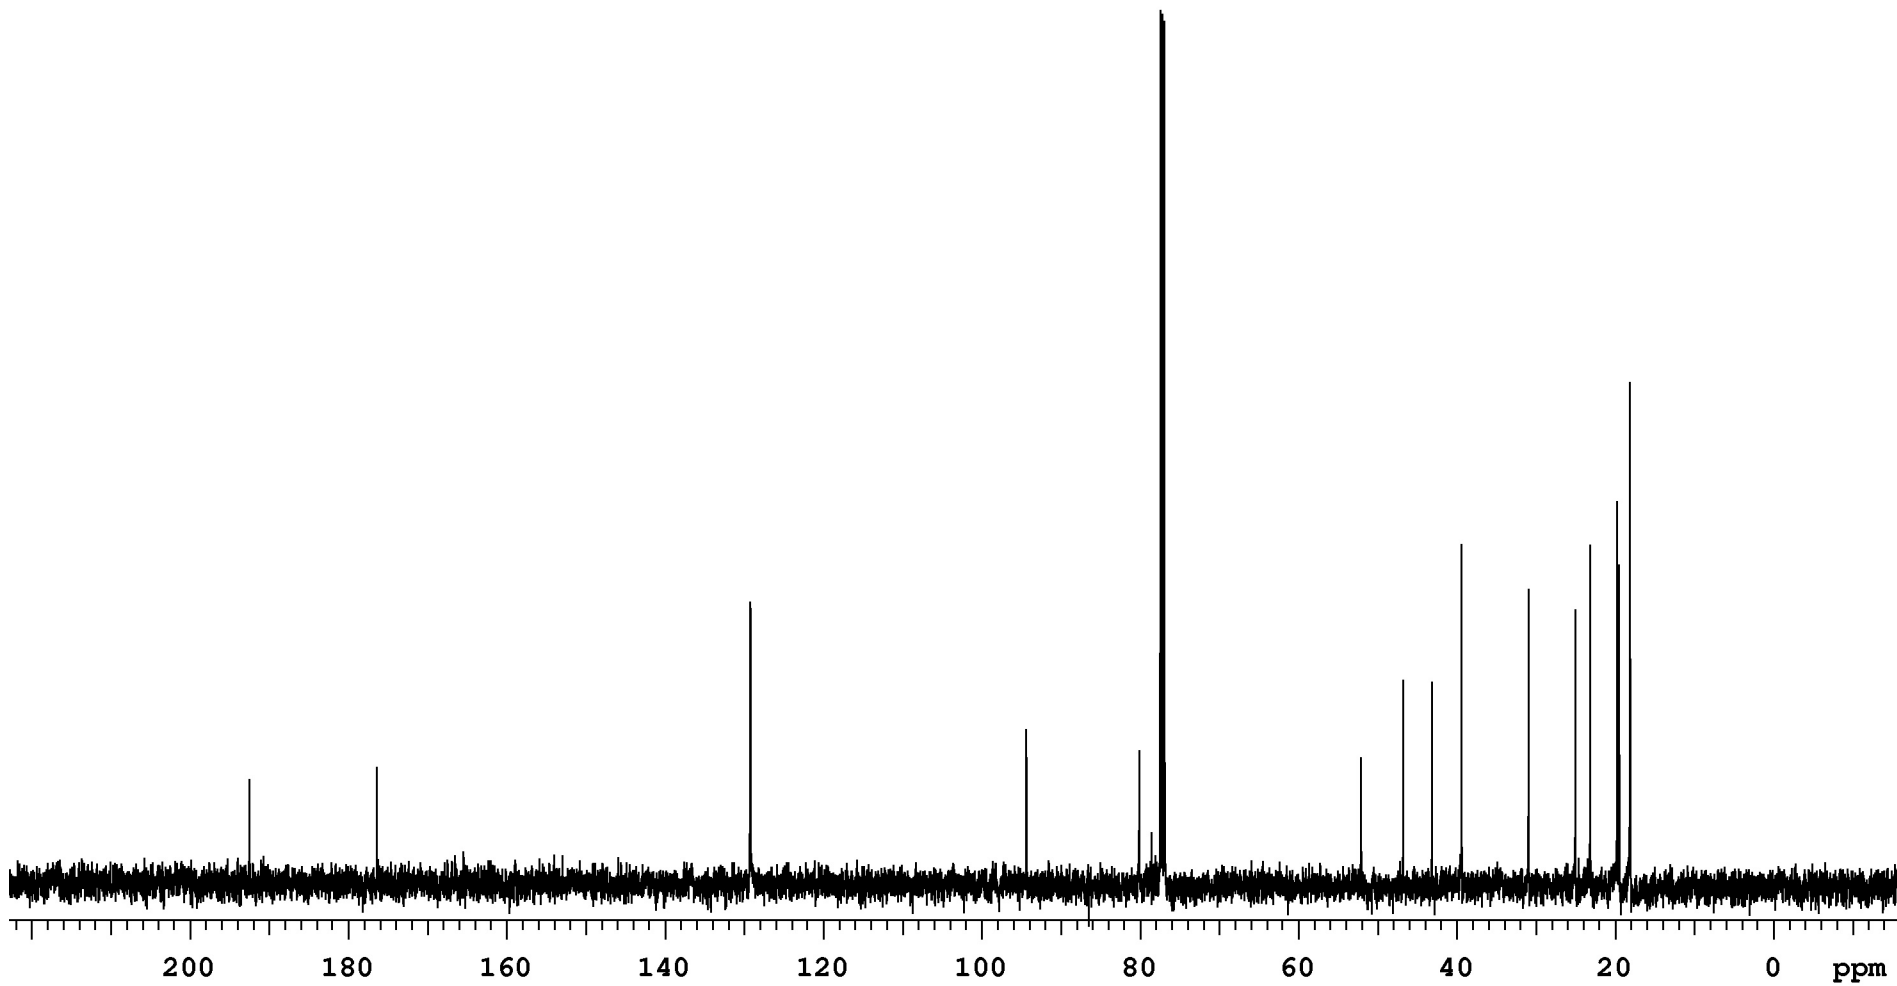

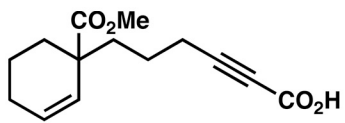

S47

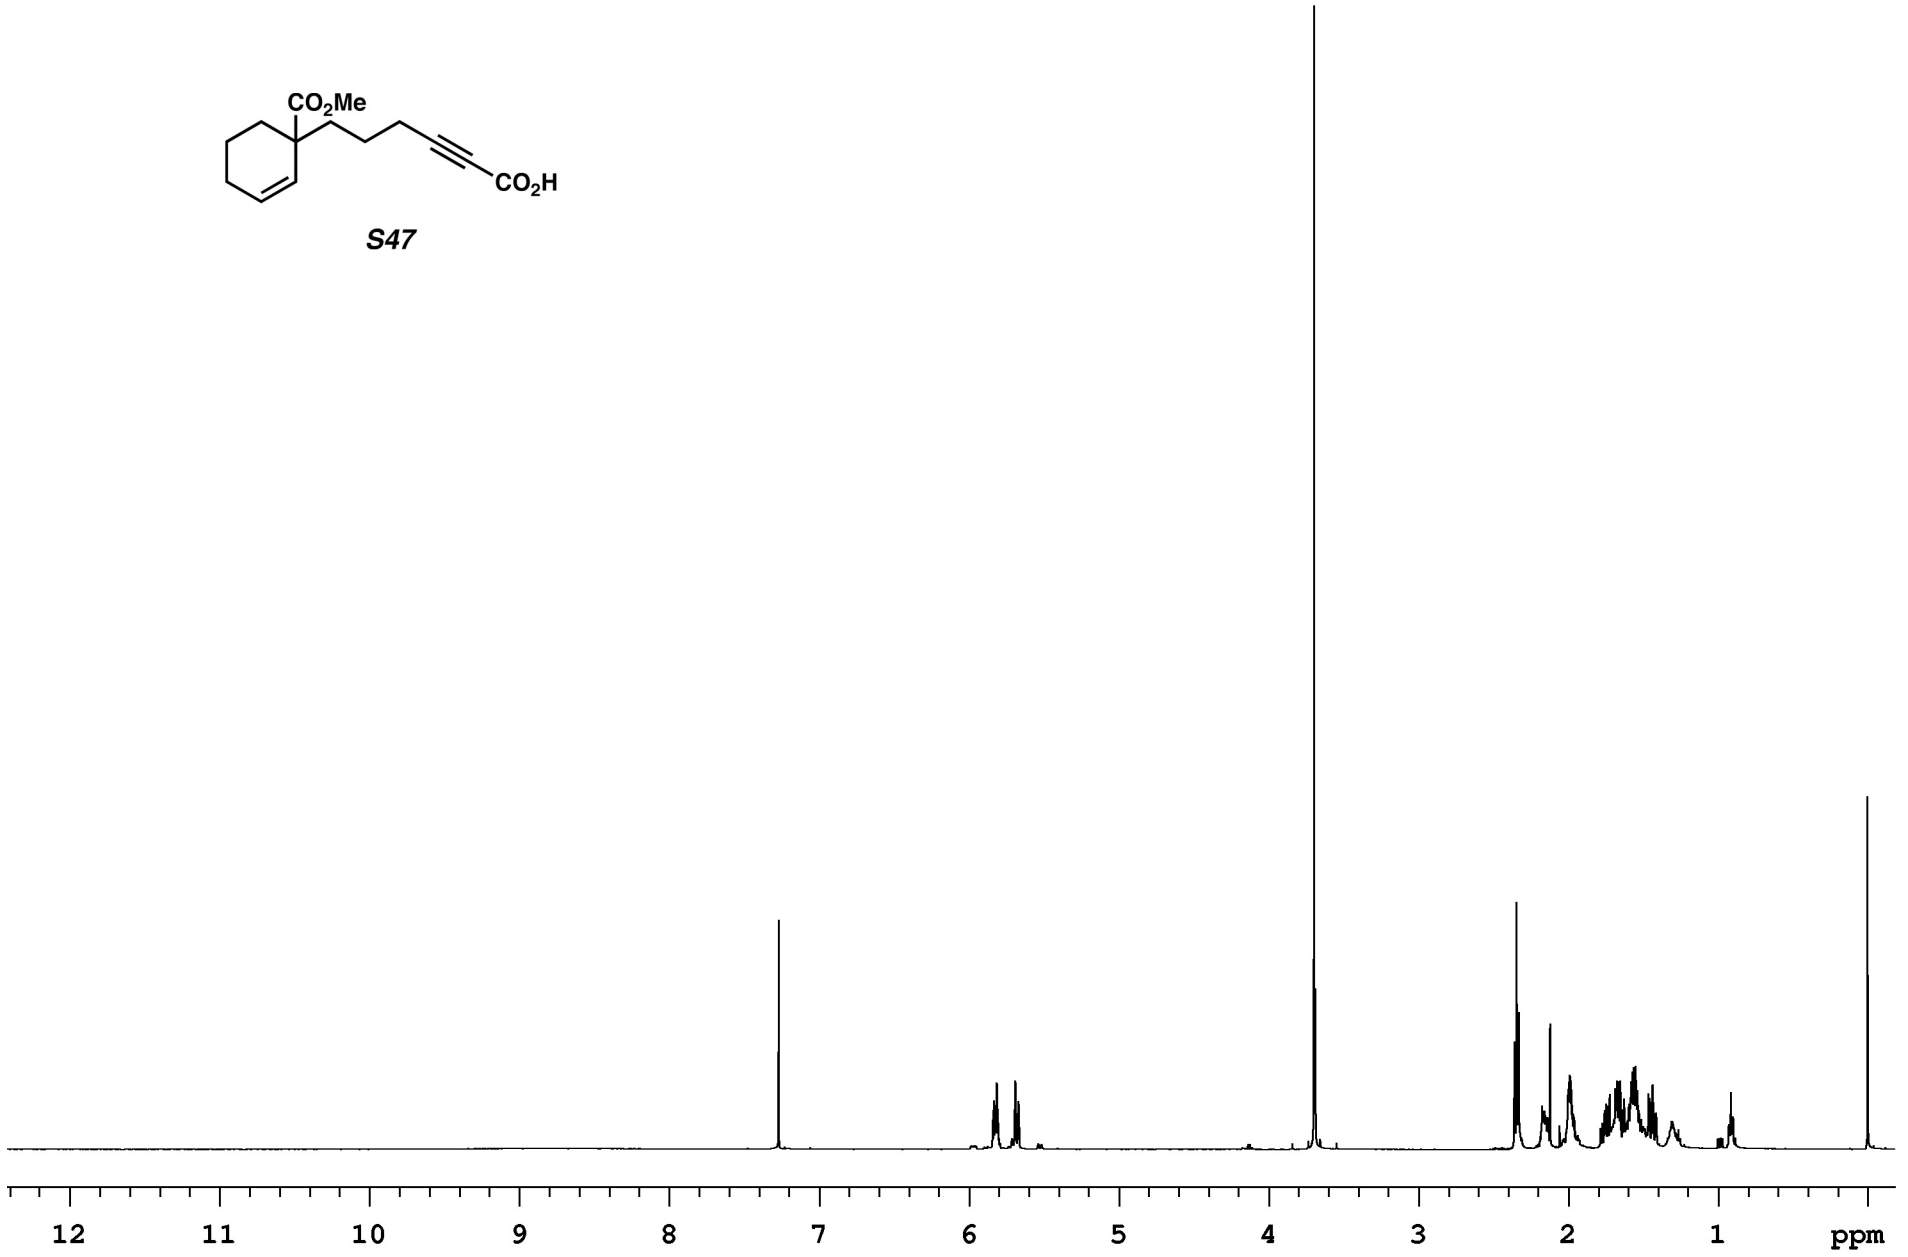

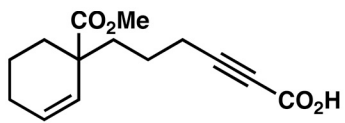

S47

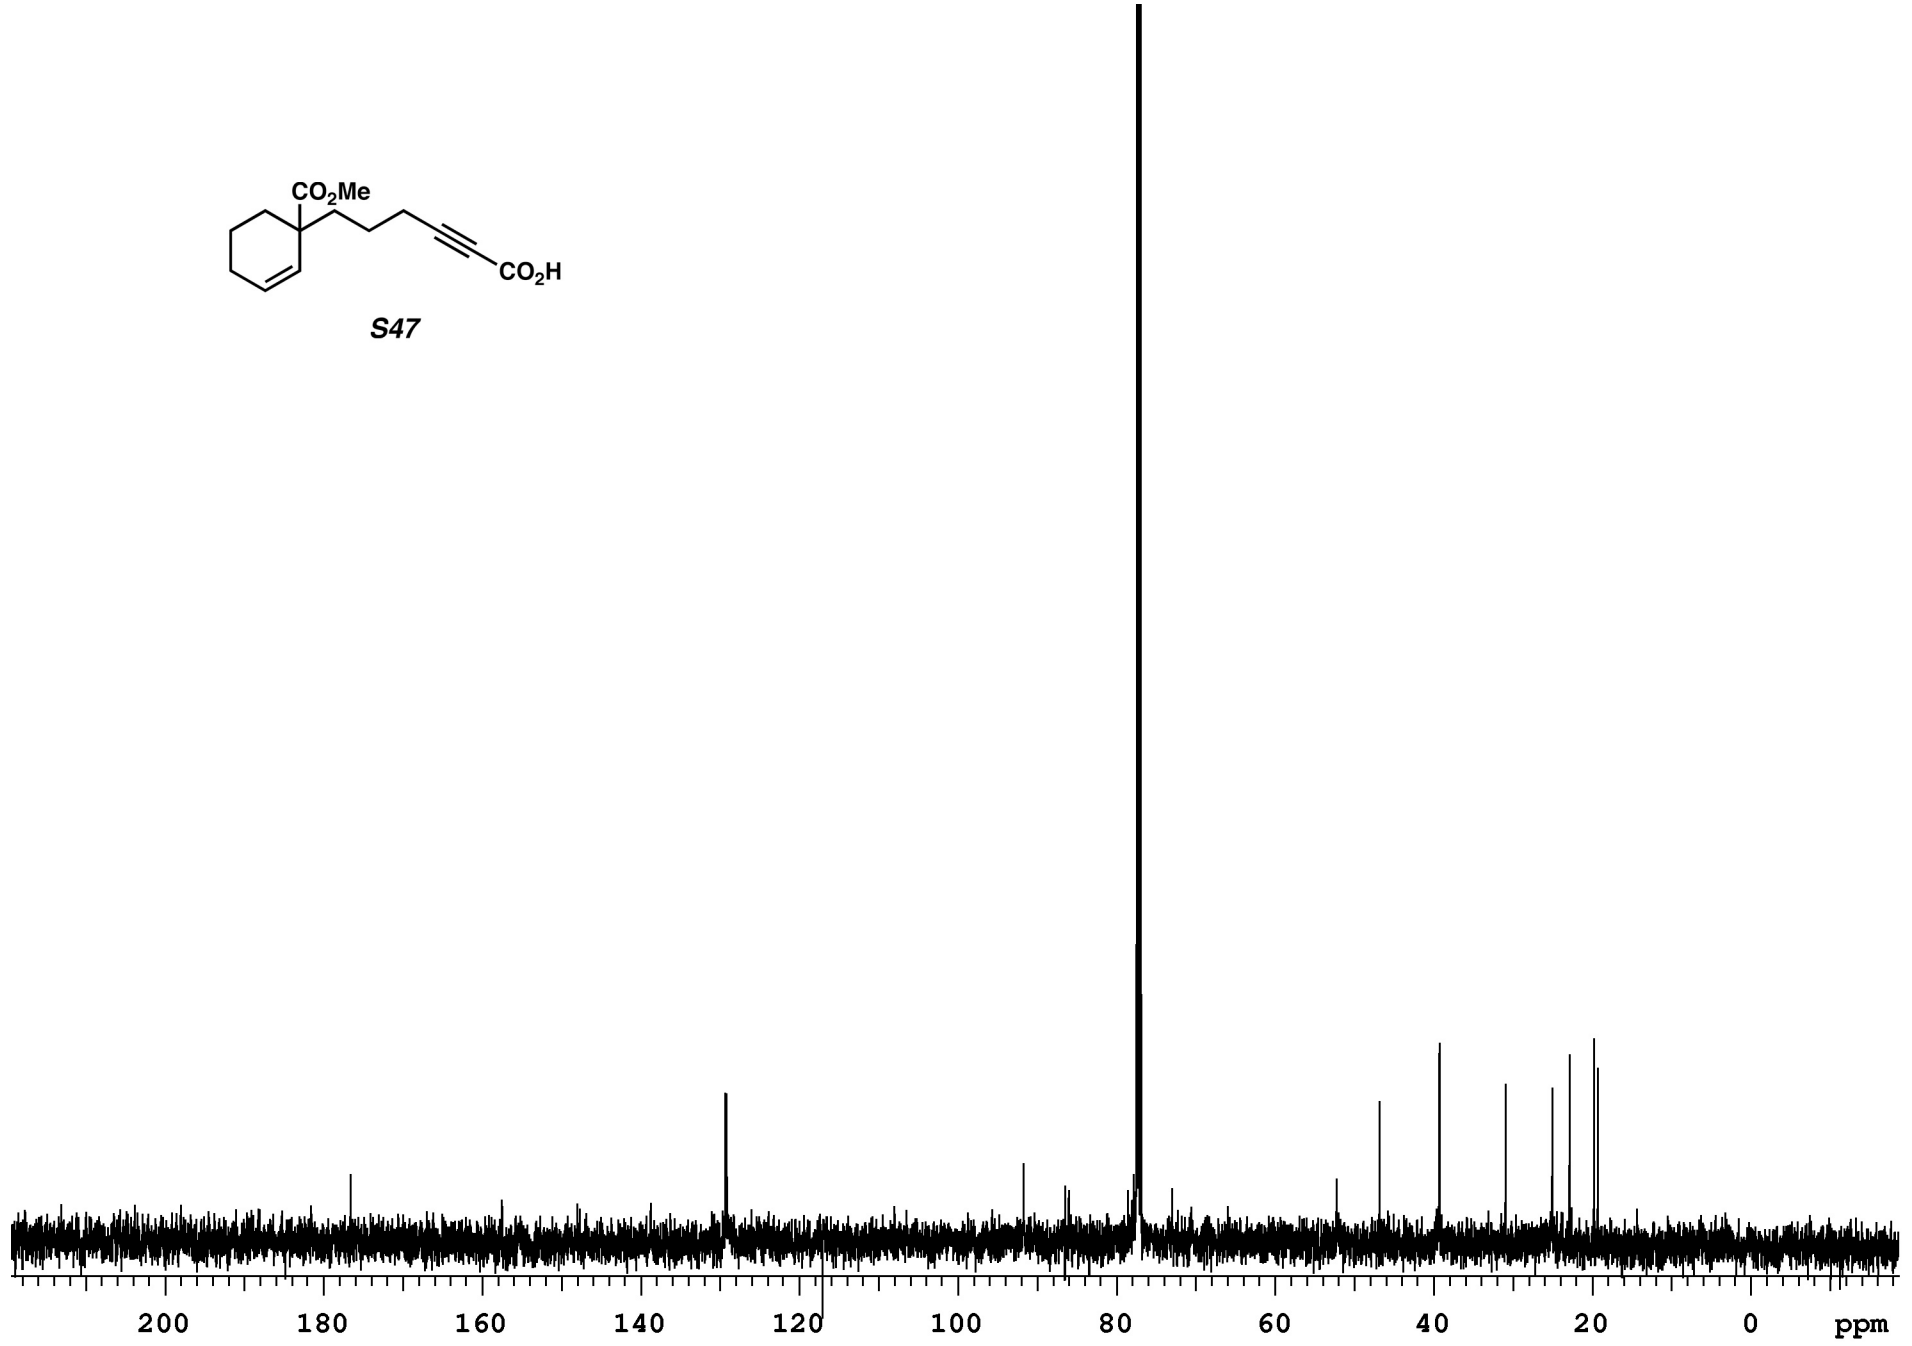

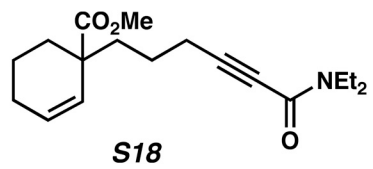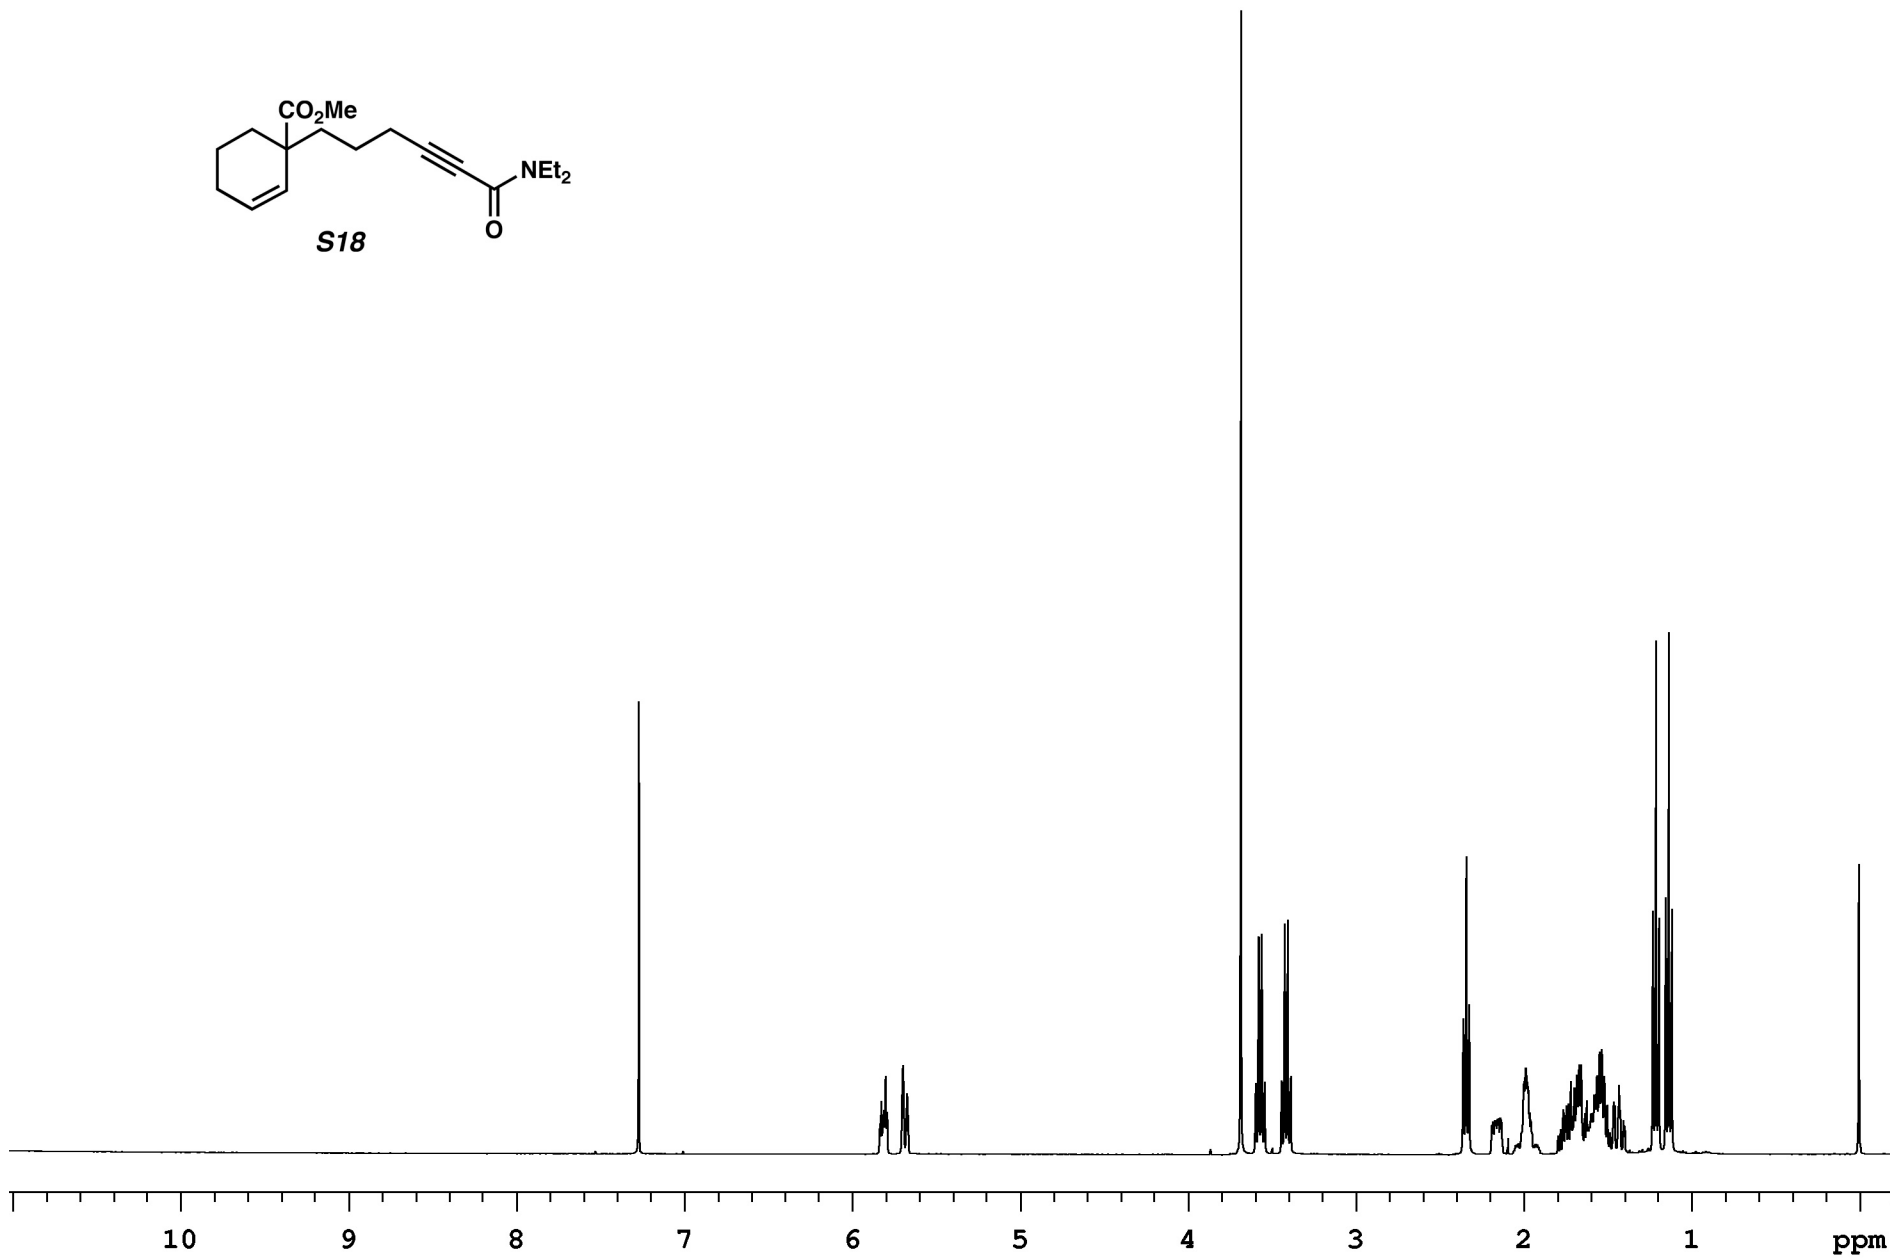

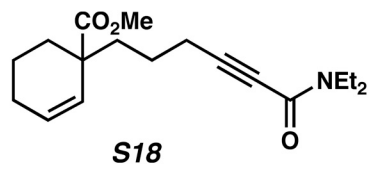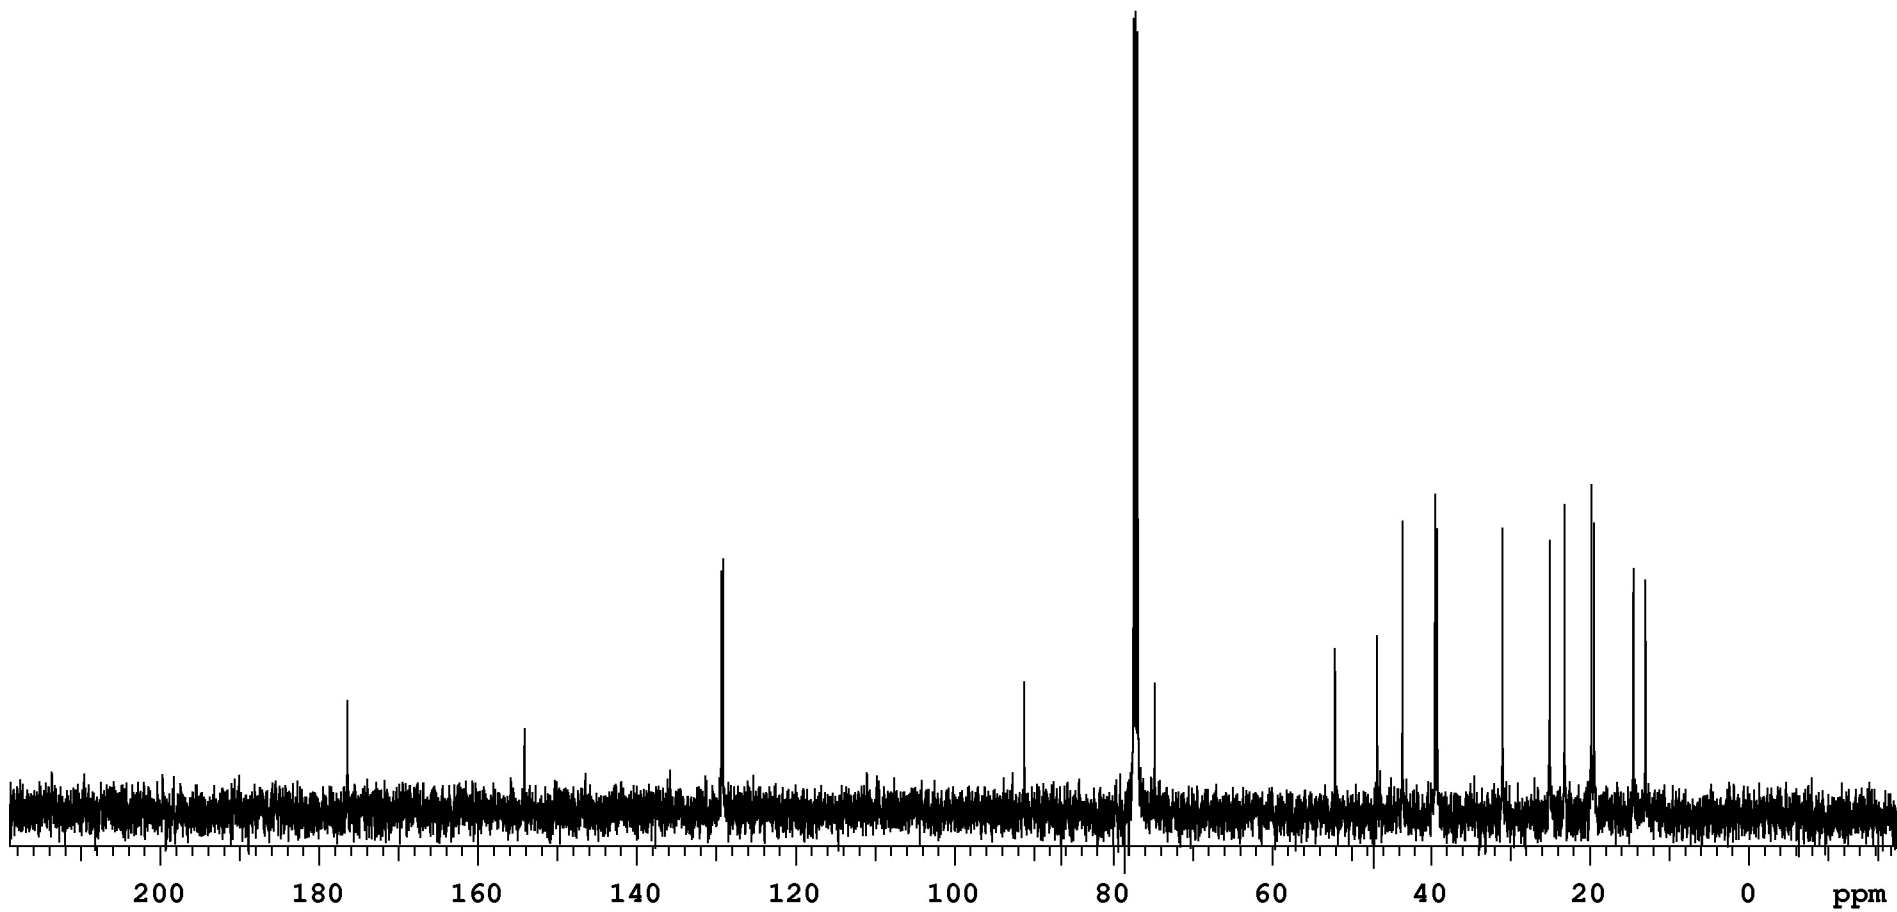

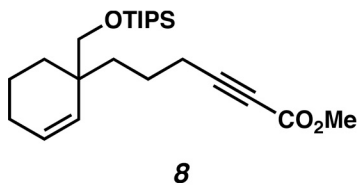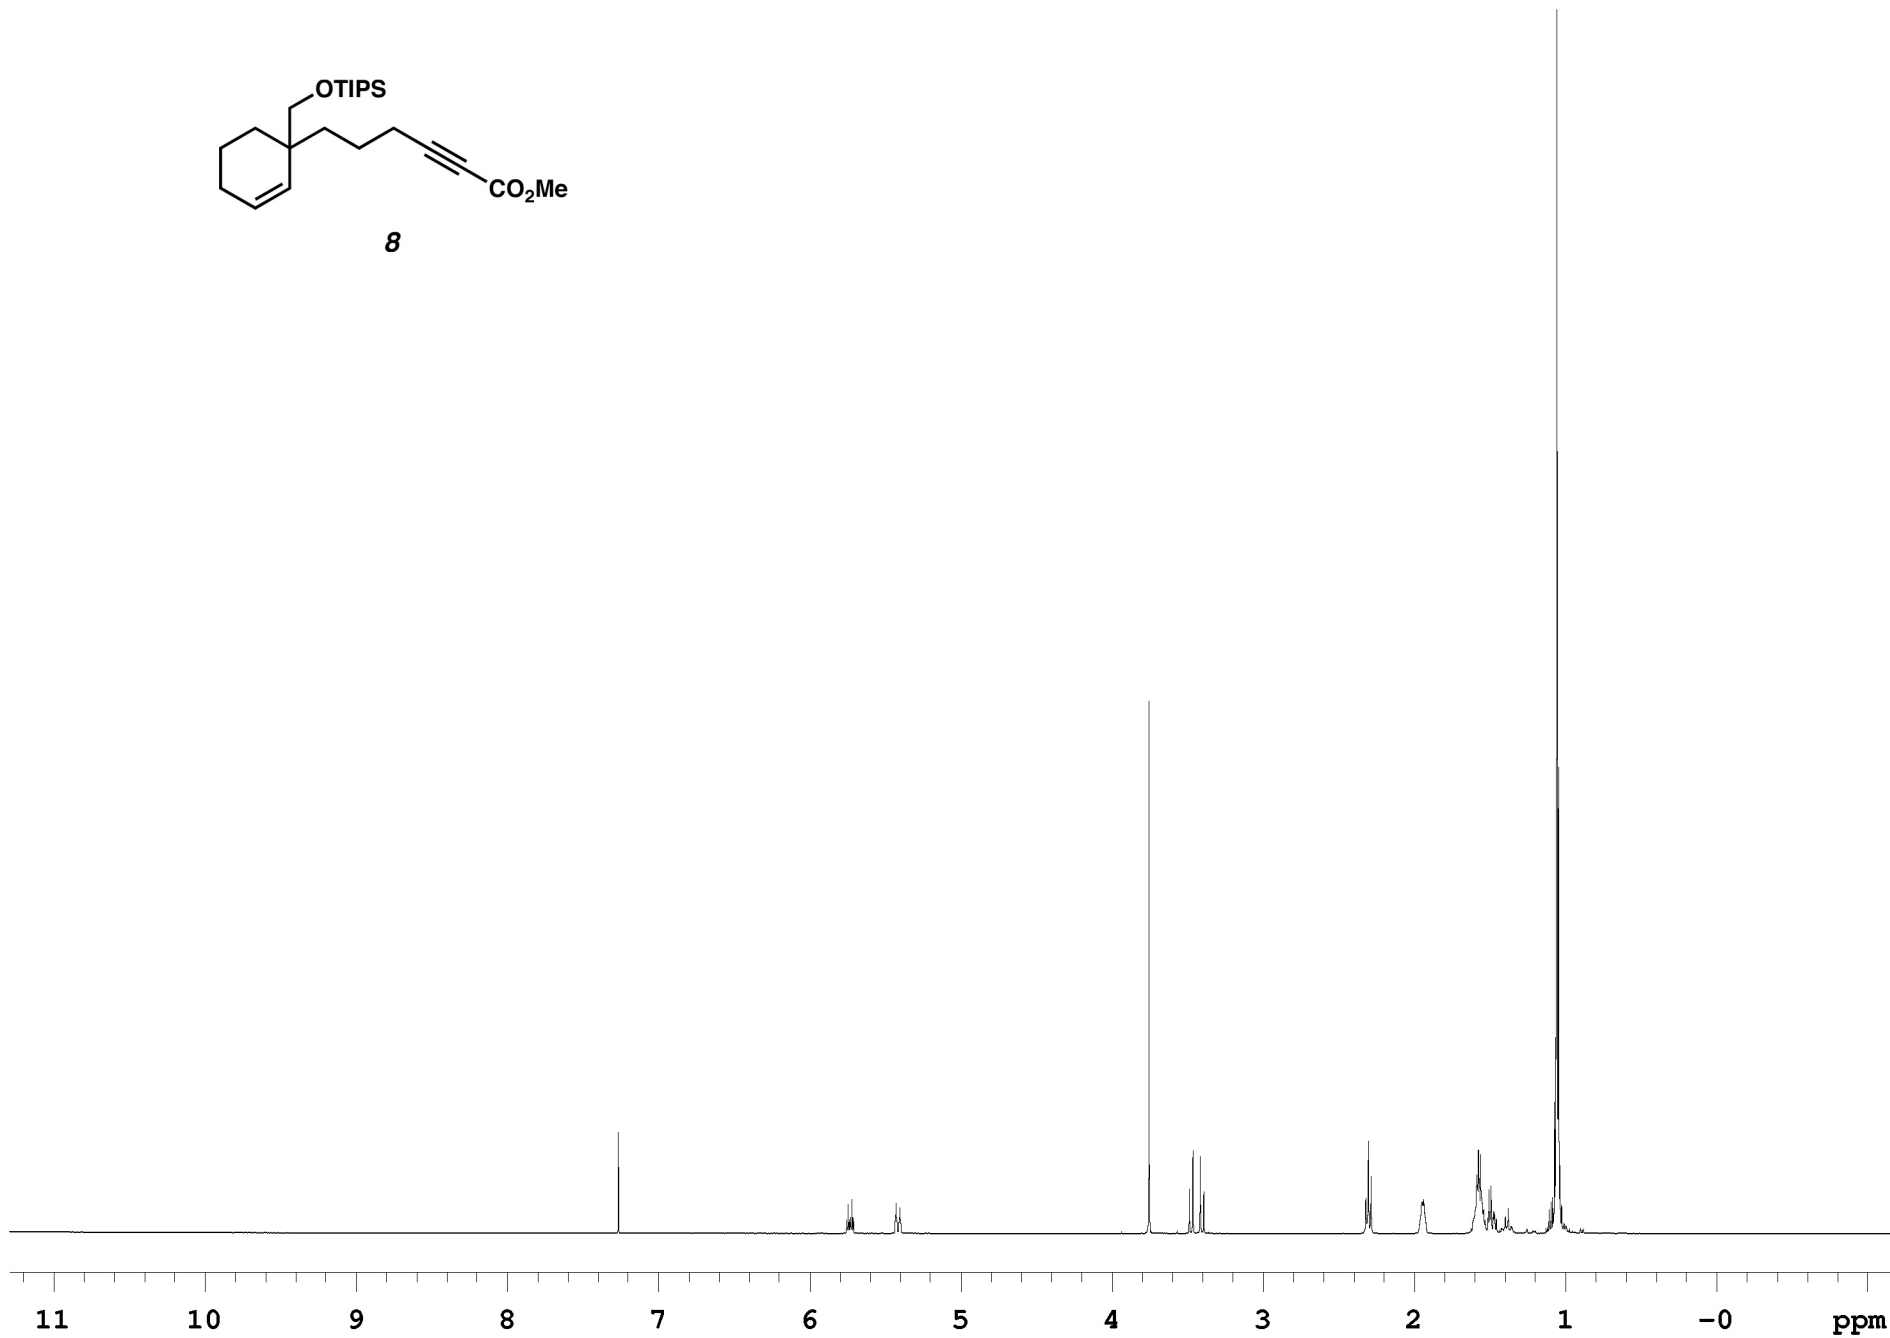

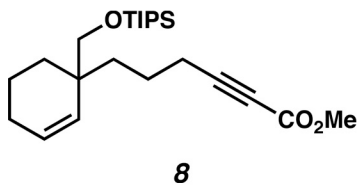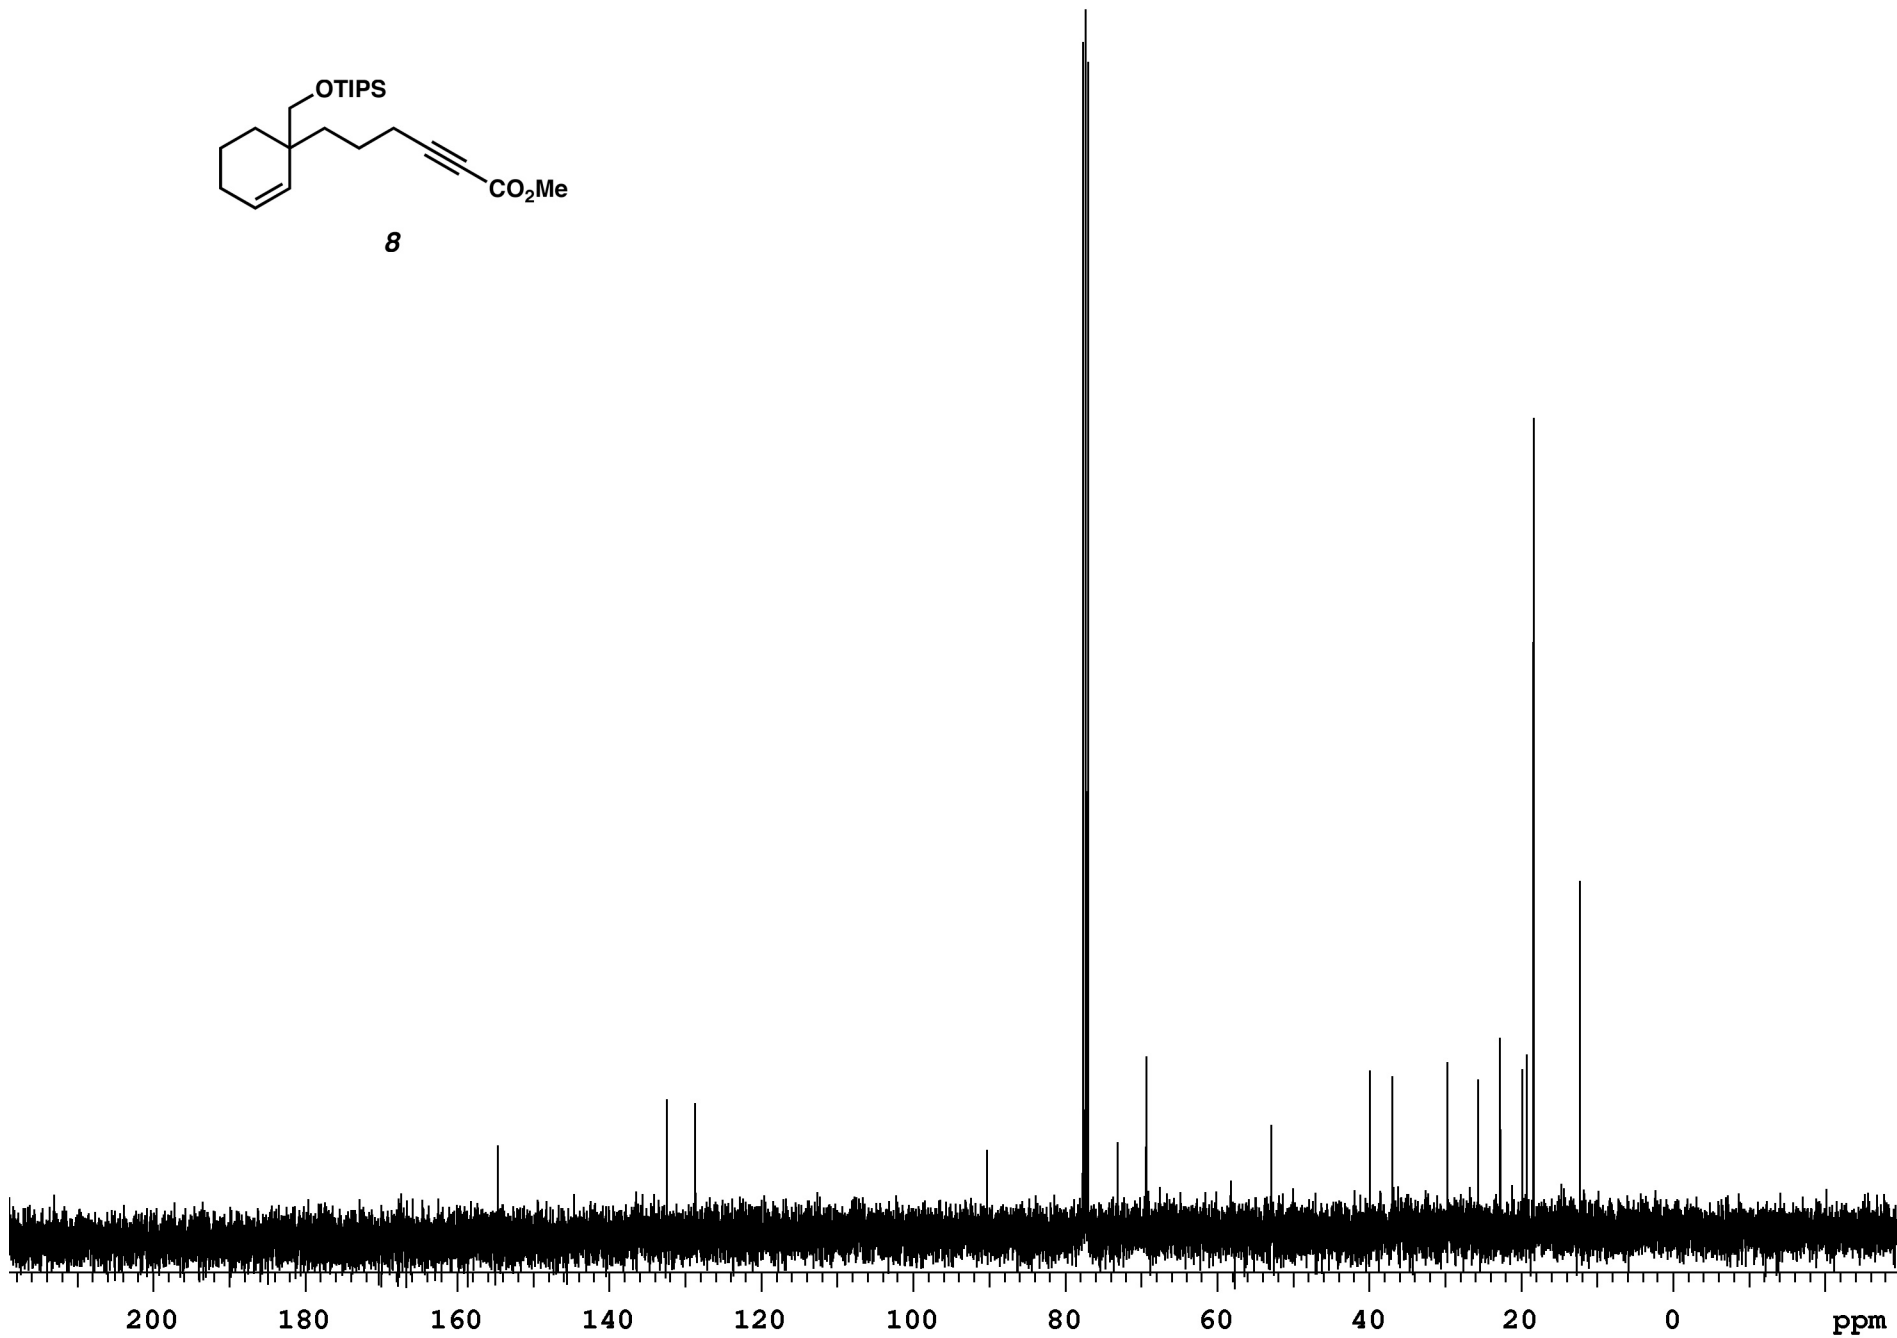



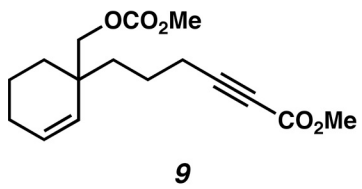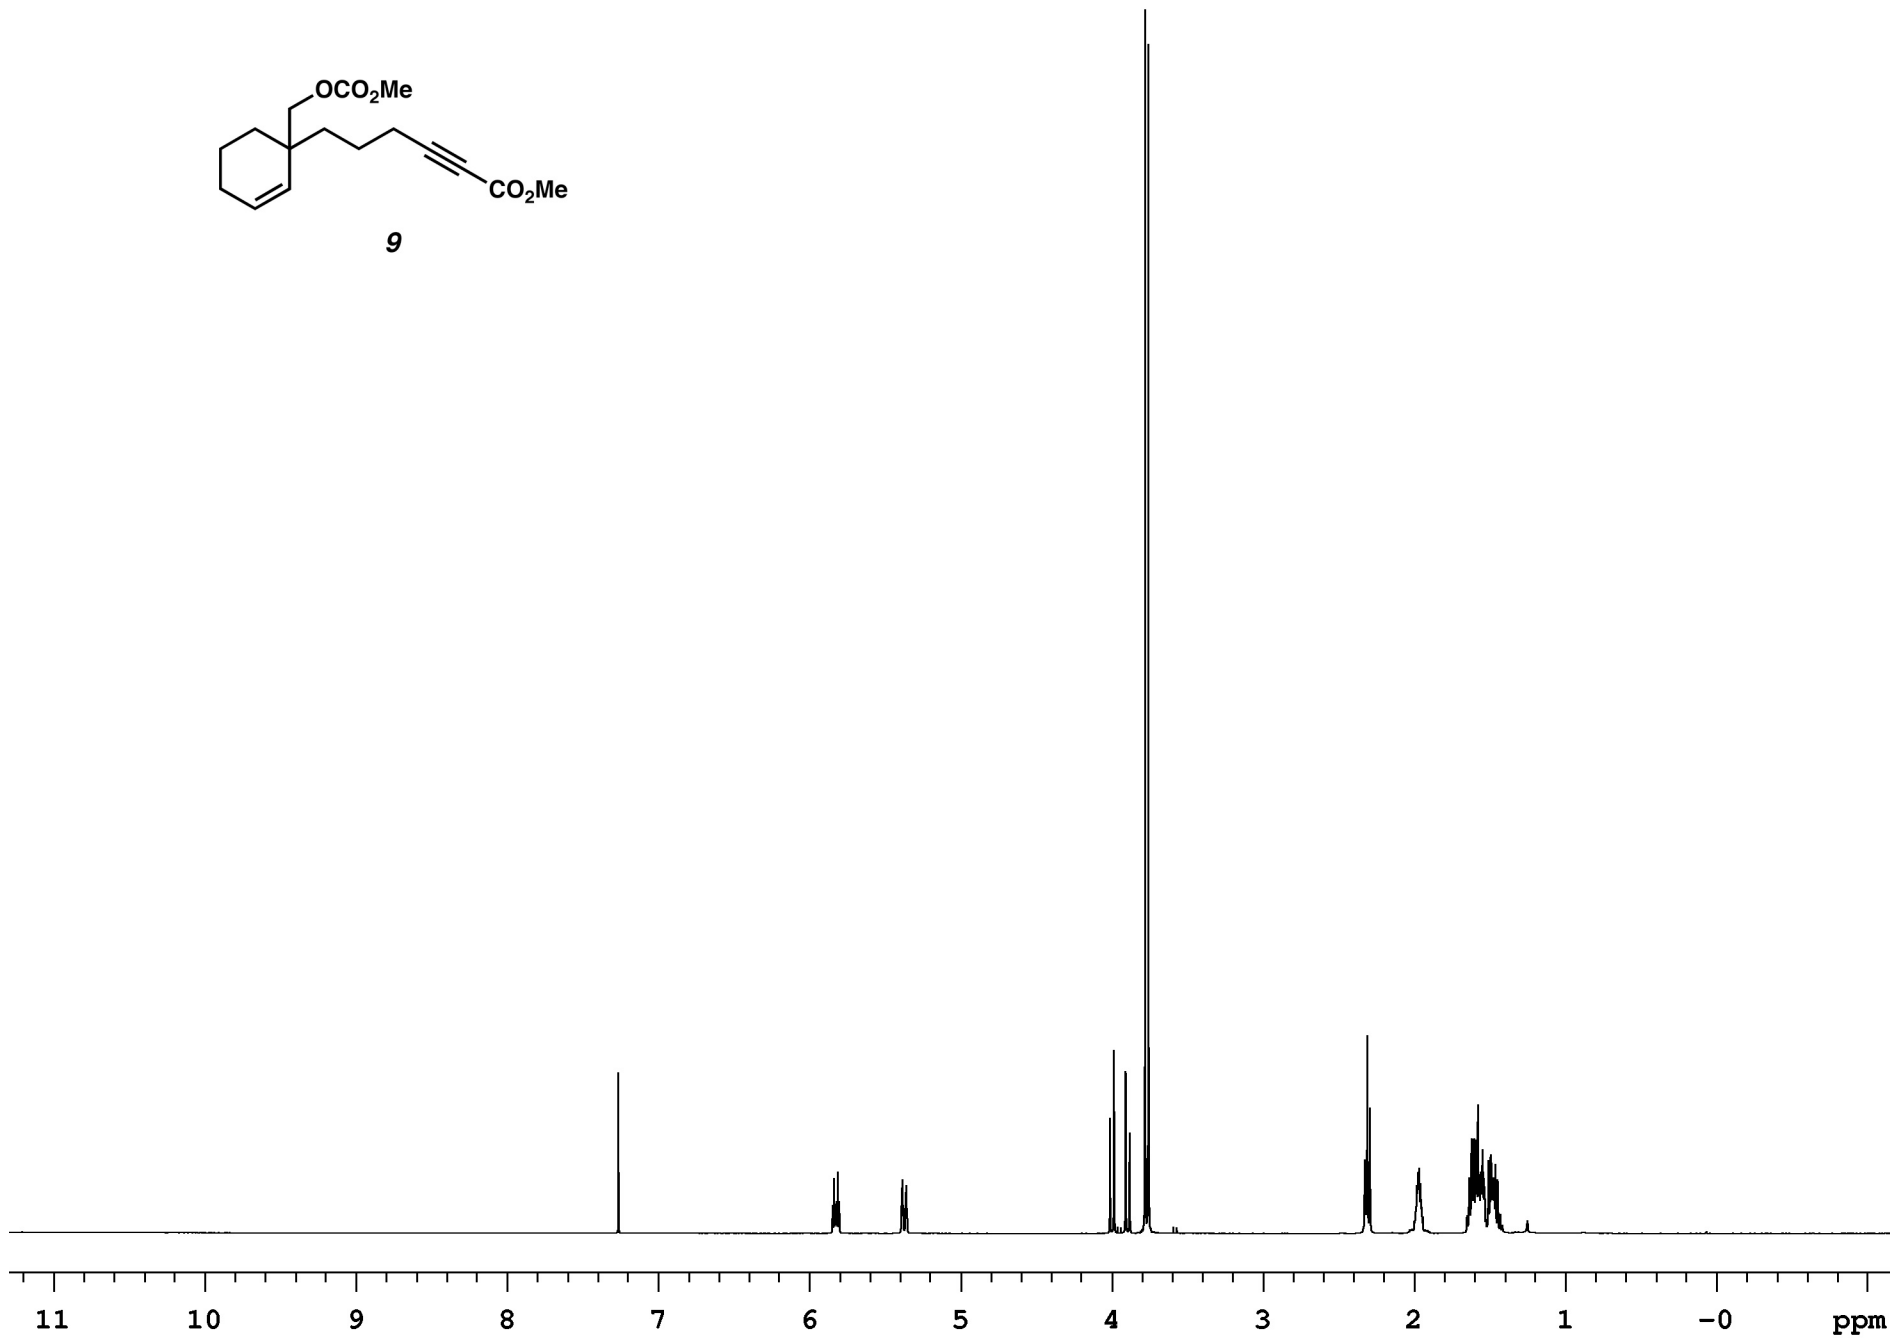

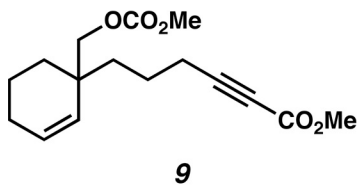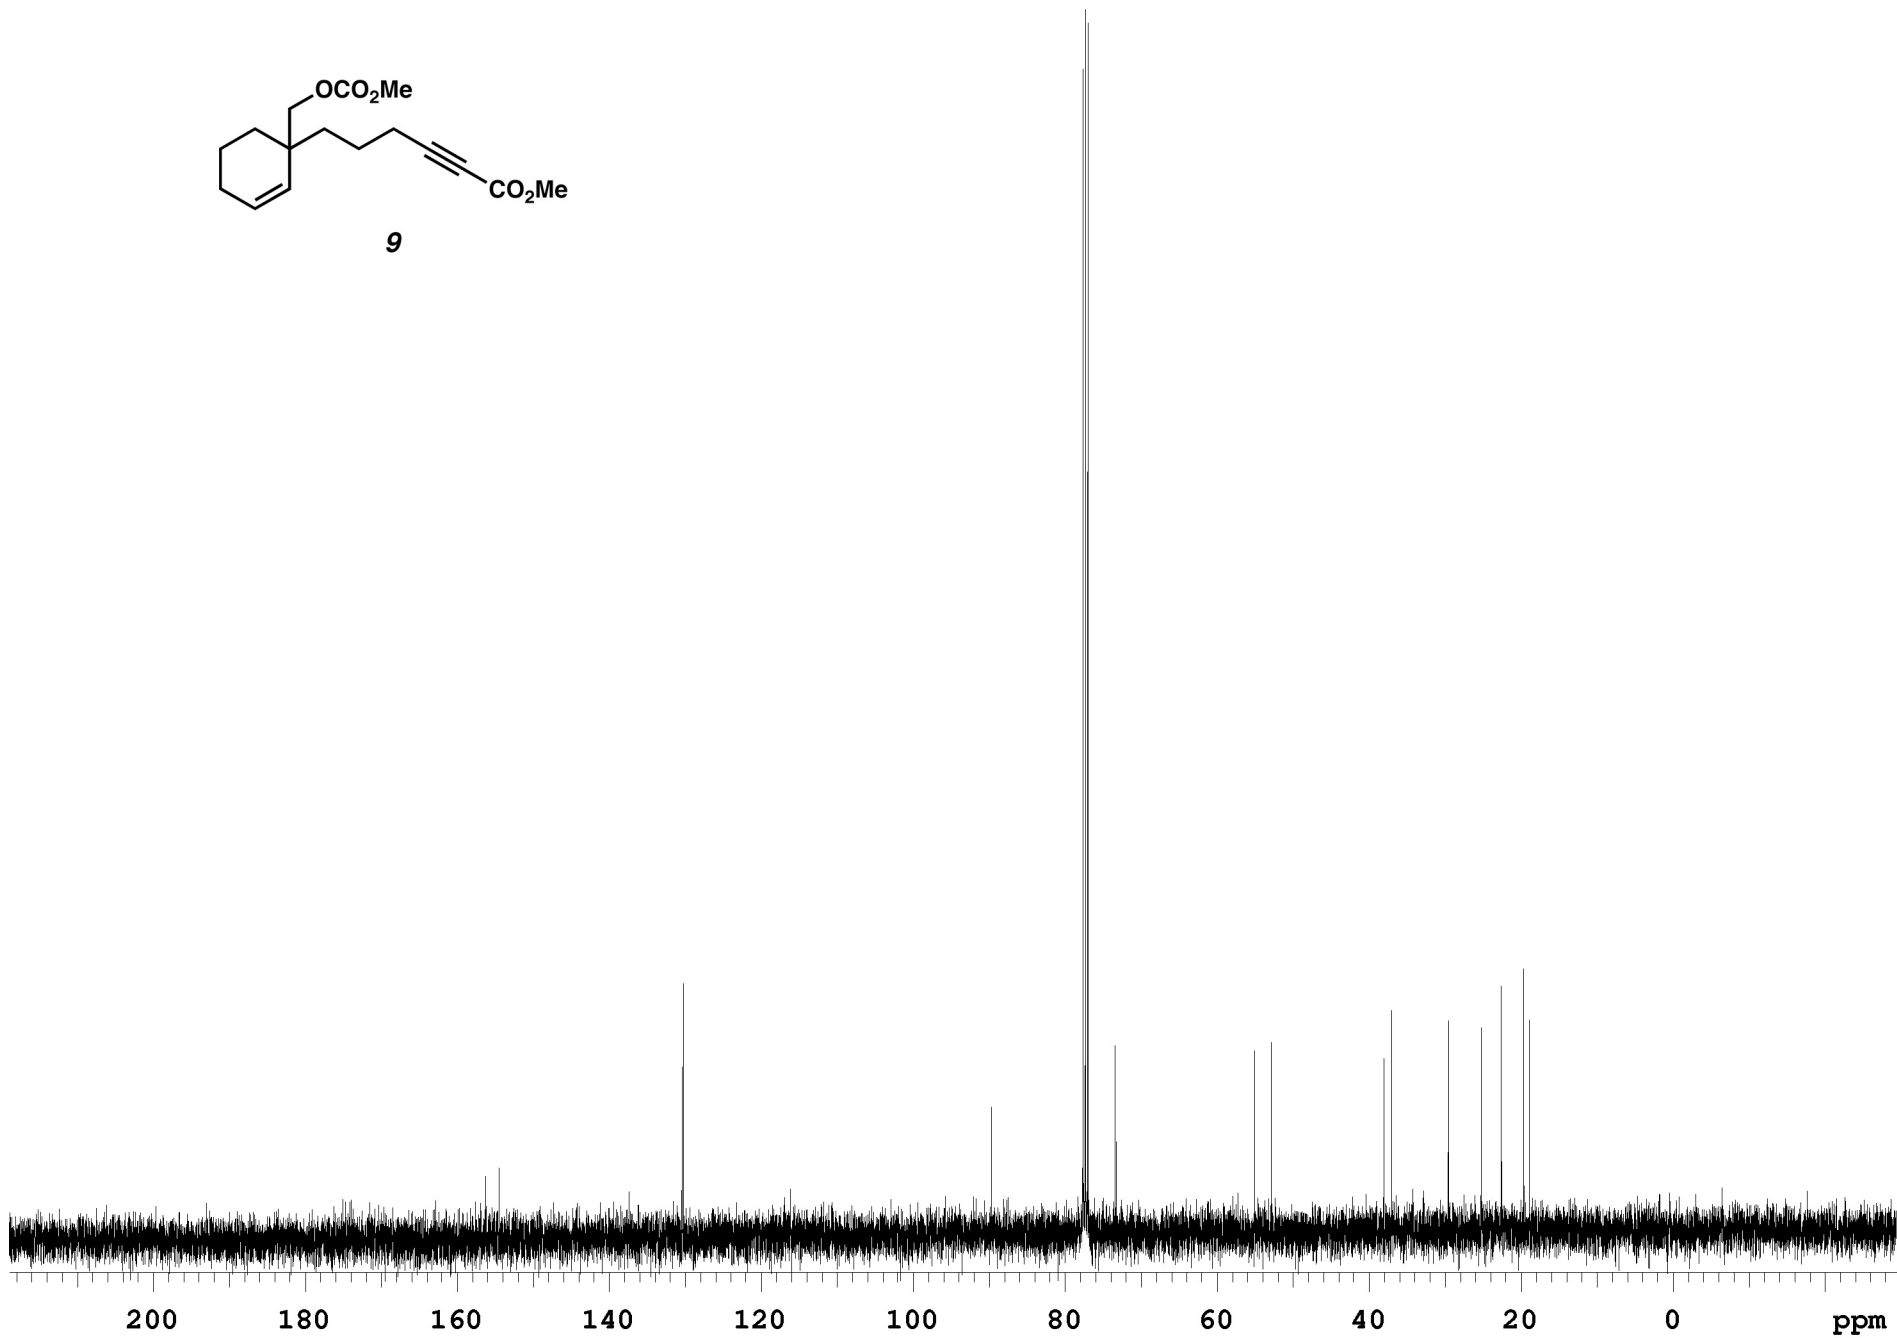

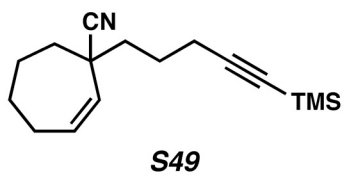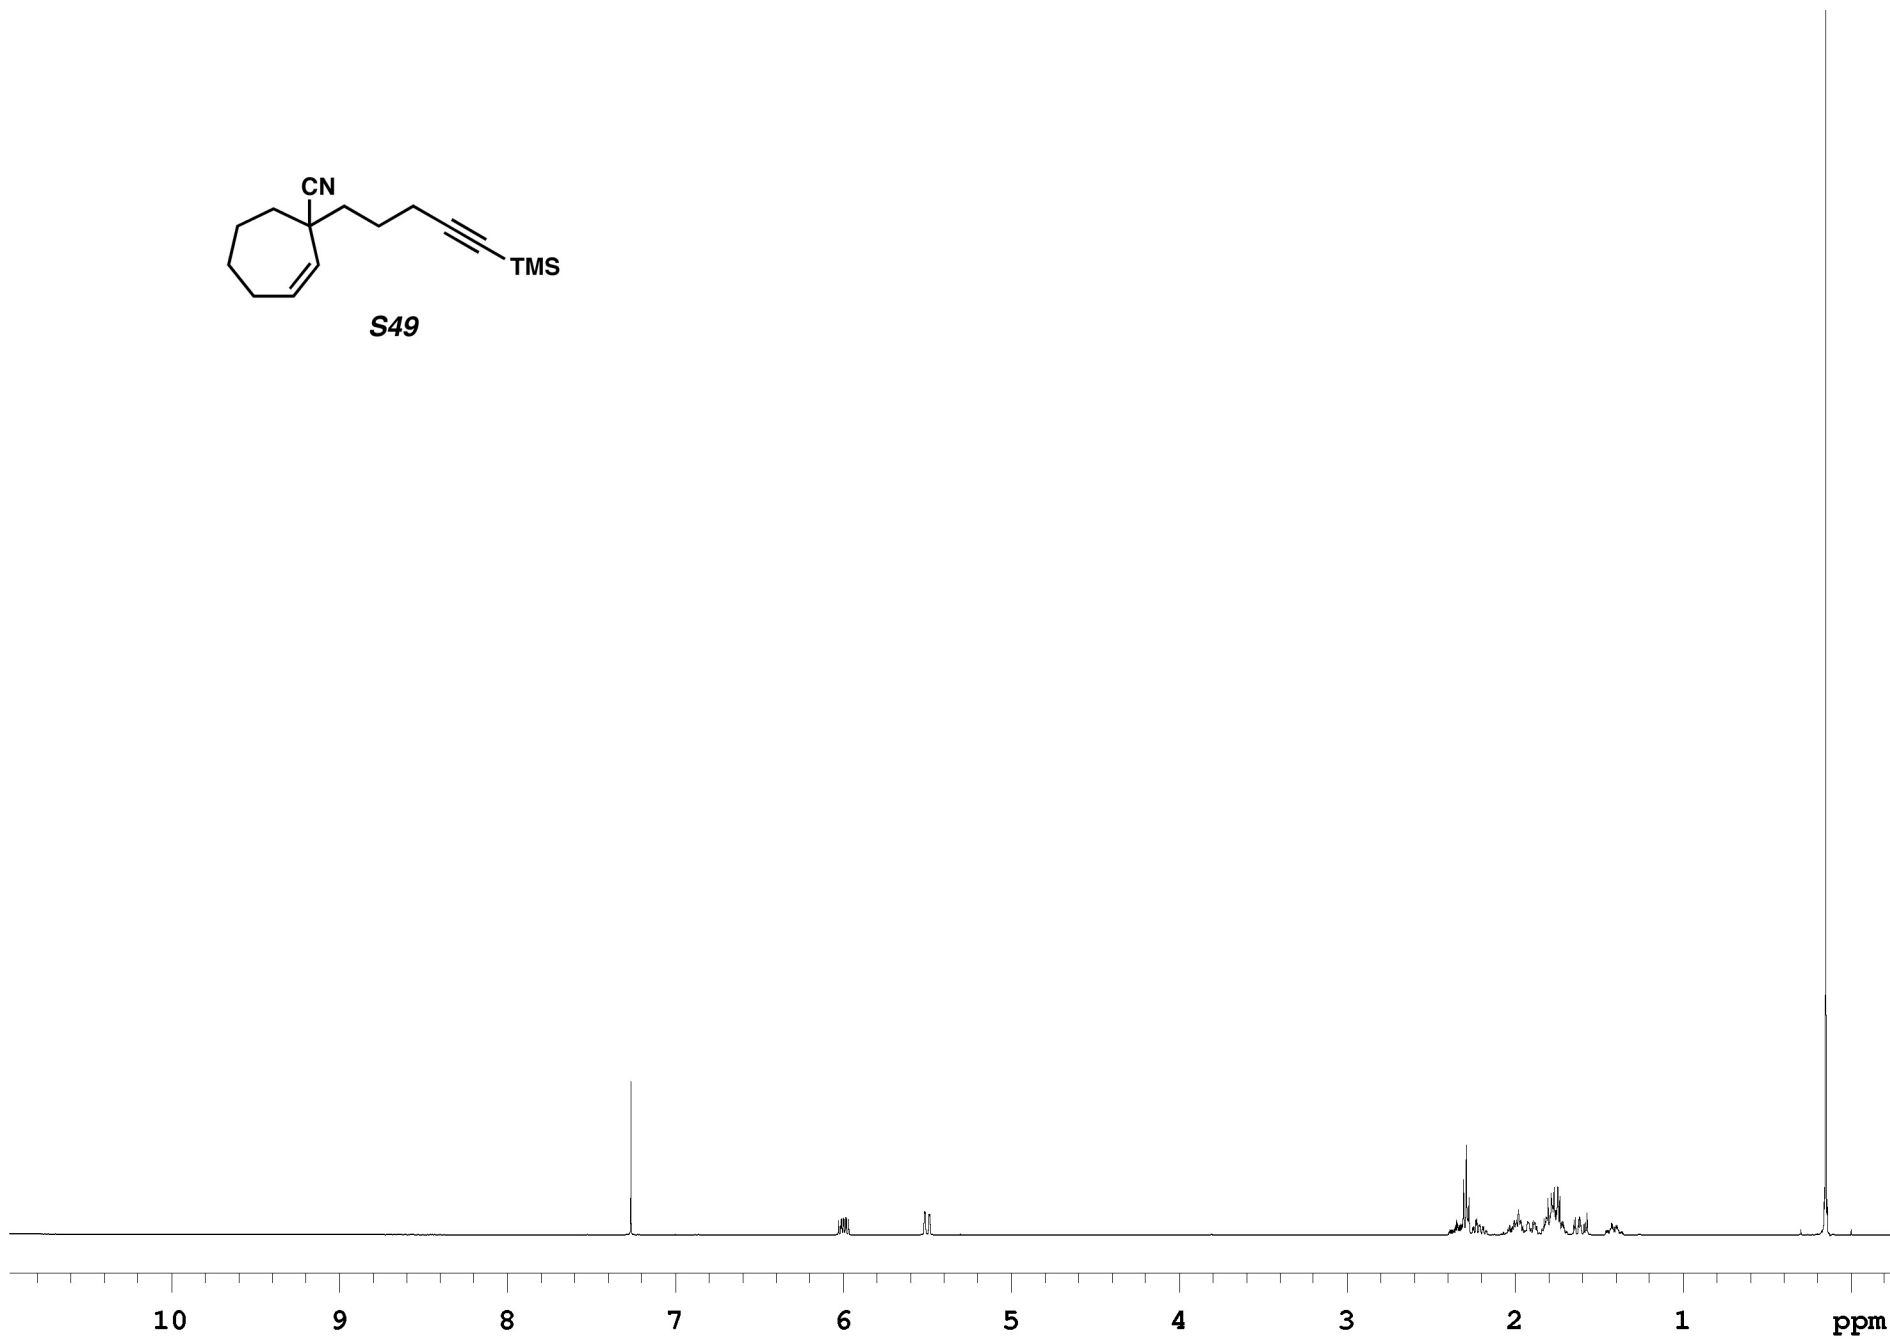

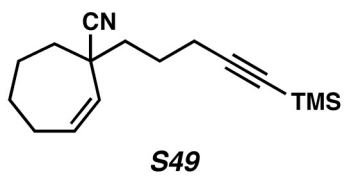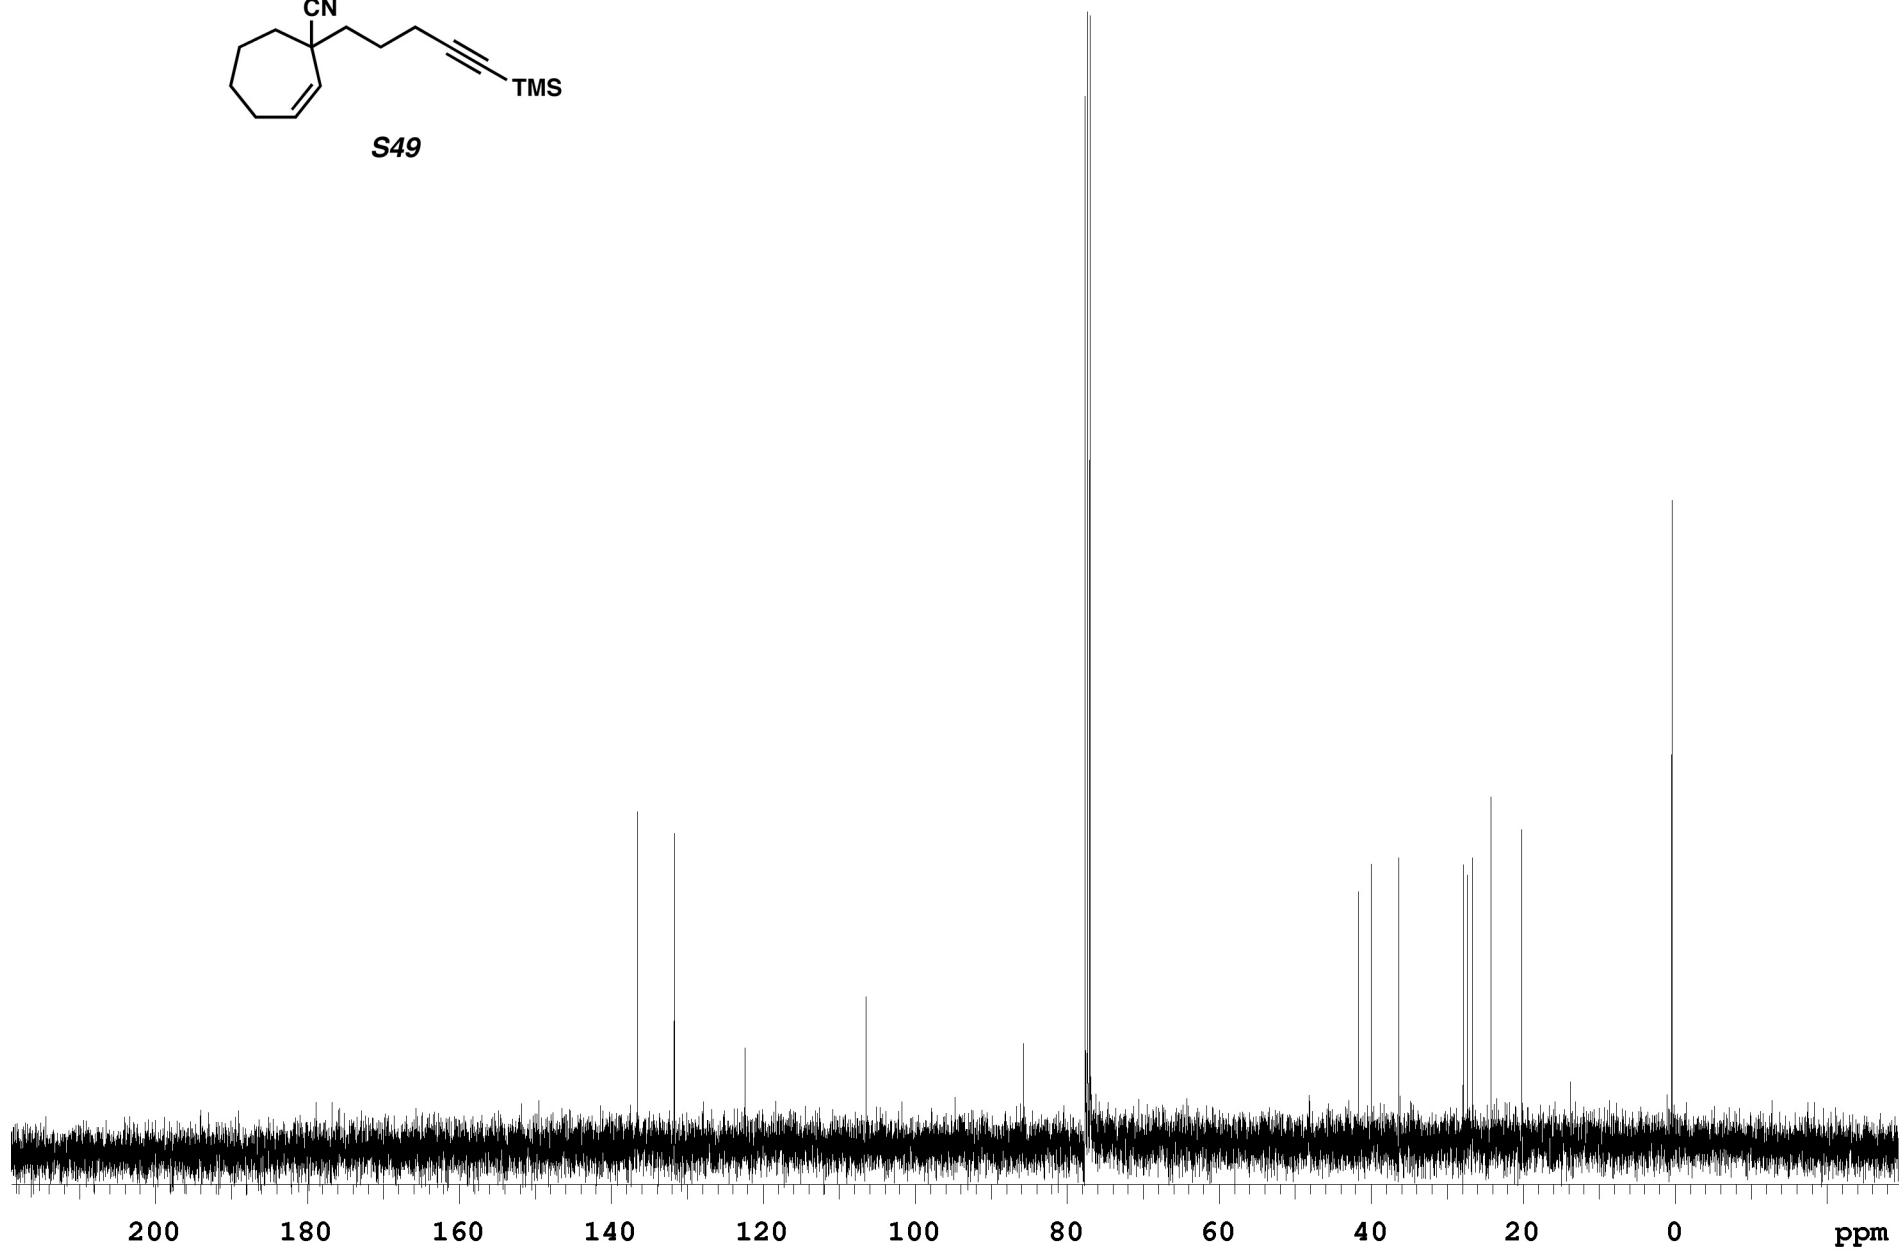

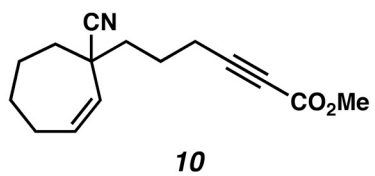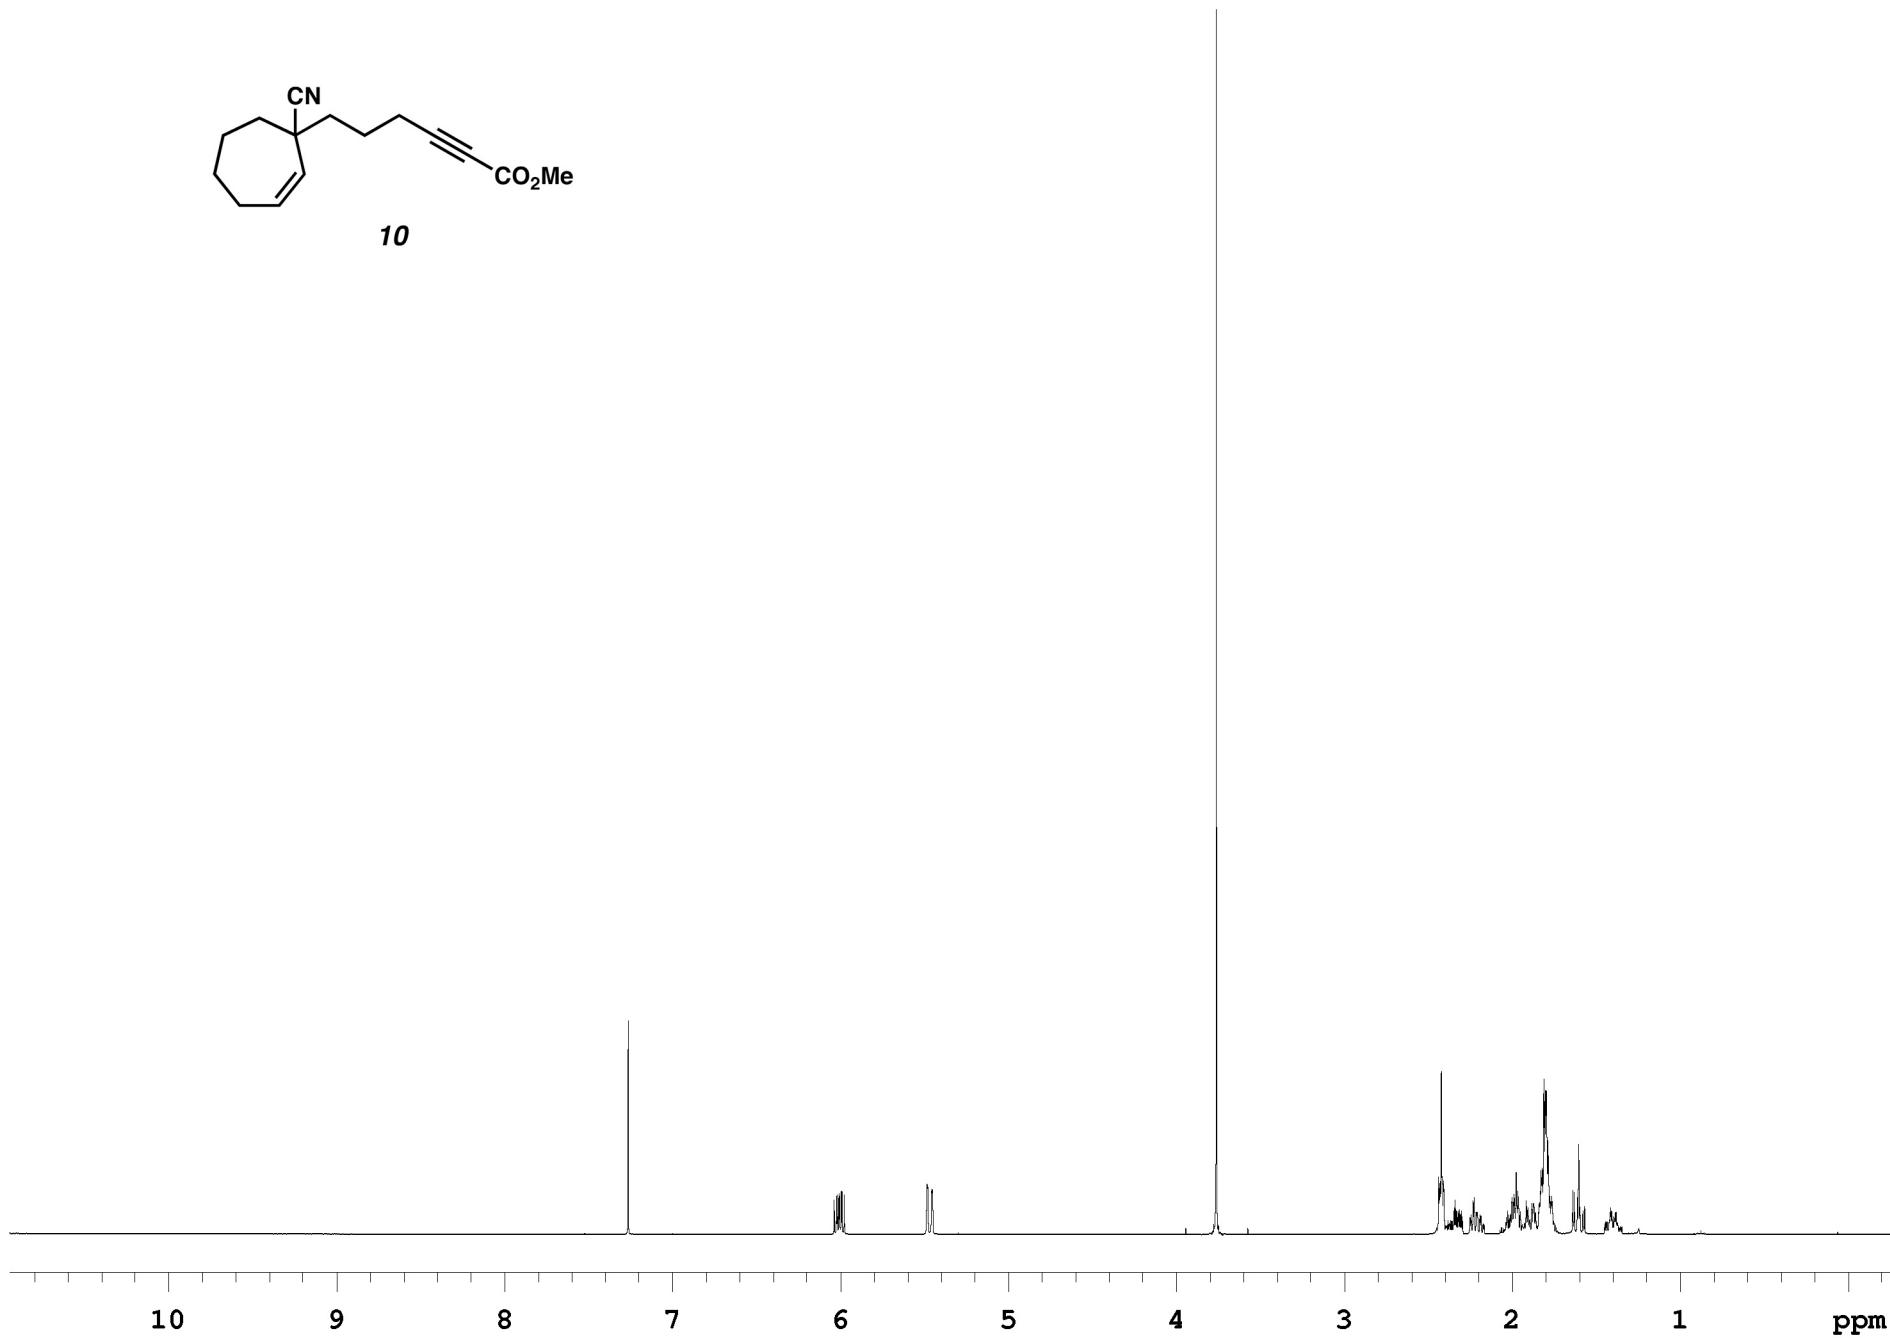

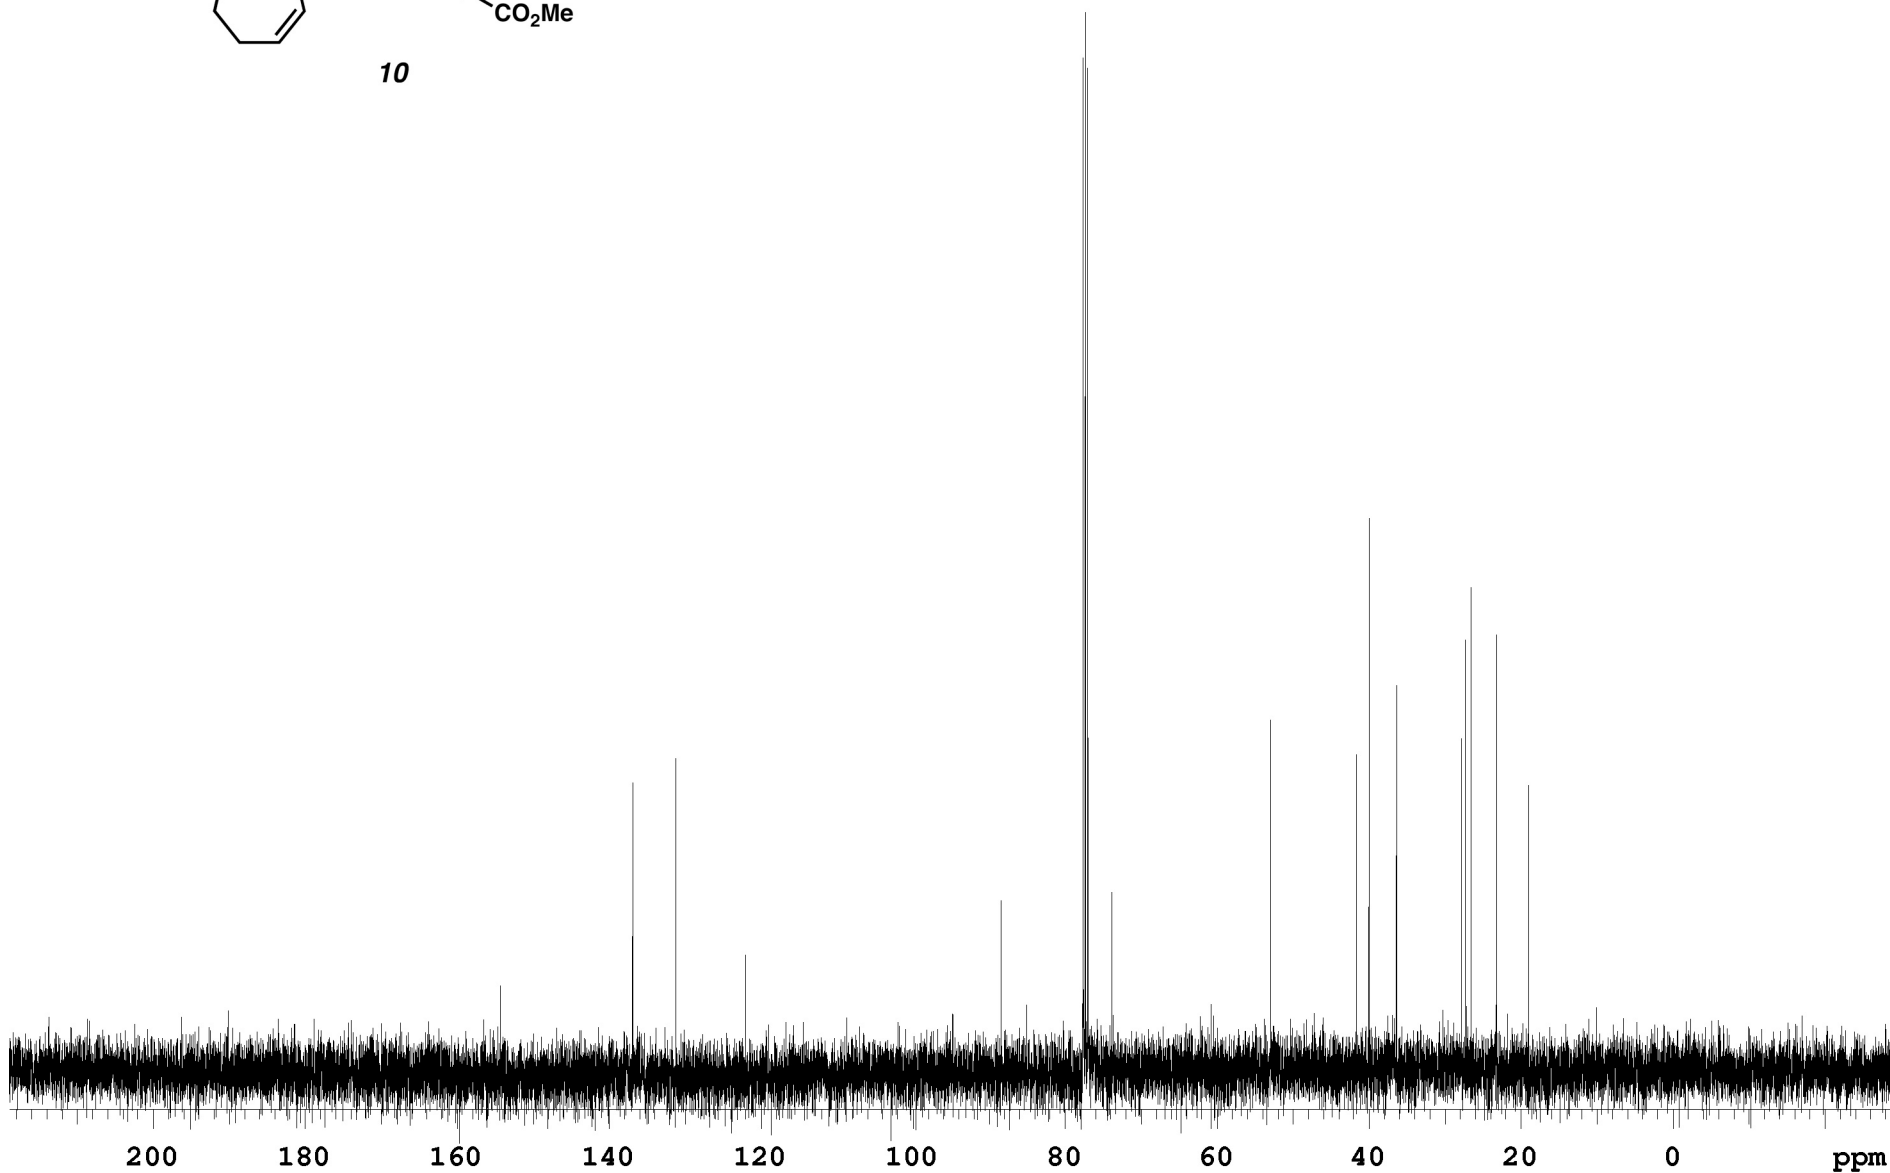

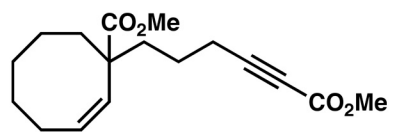

11

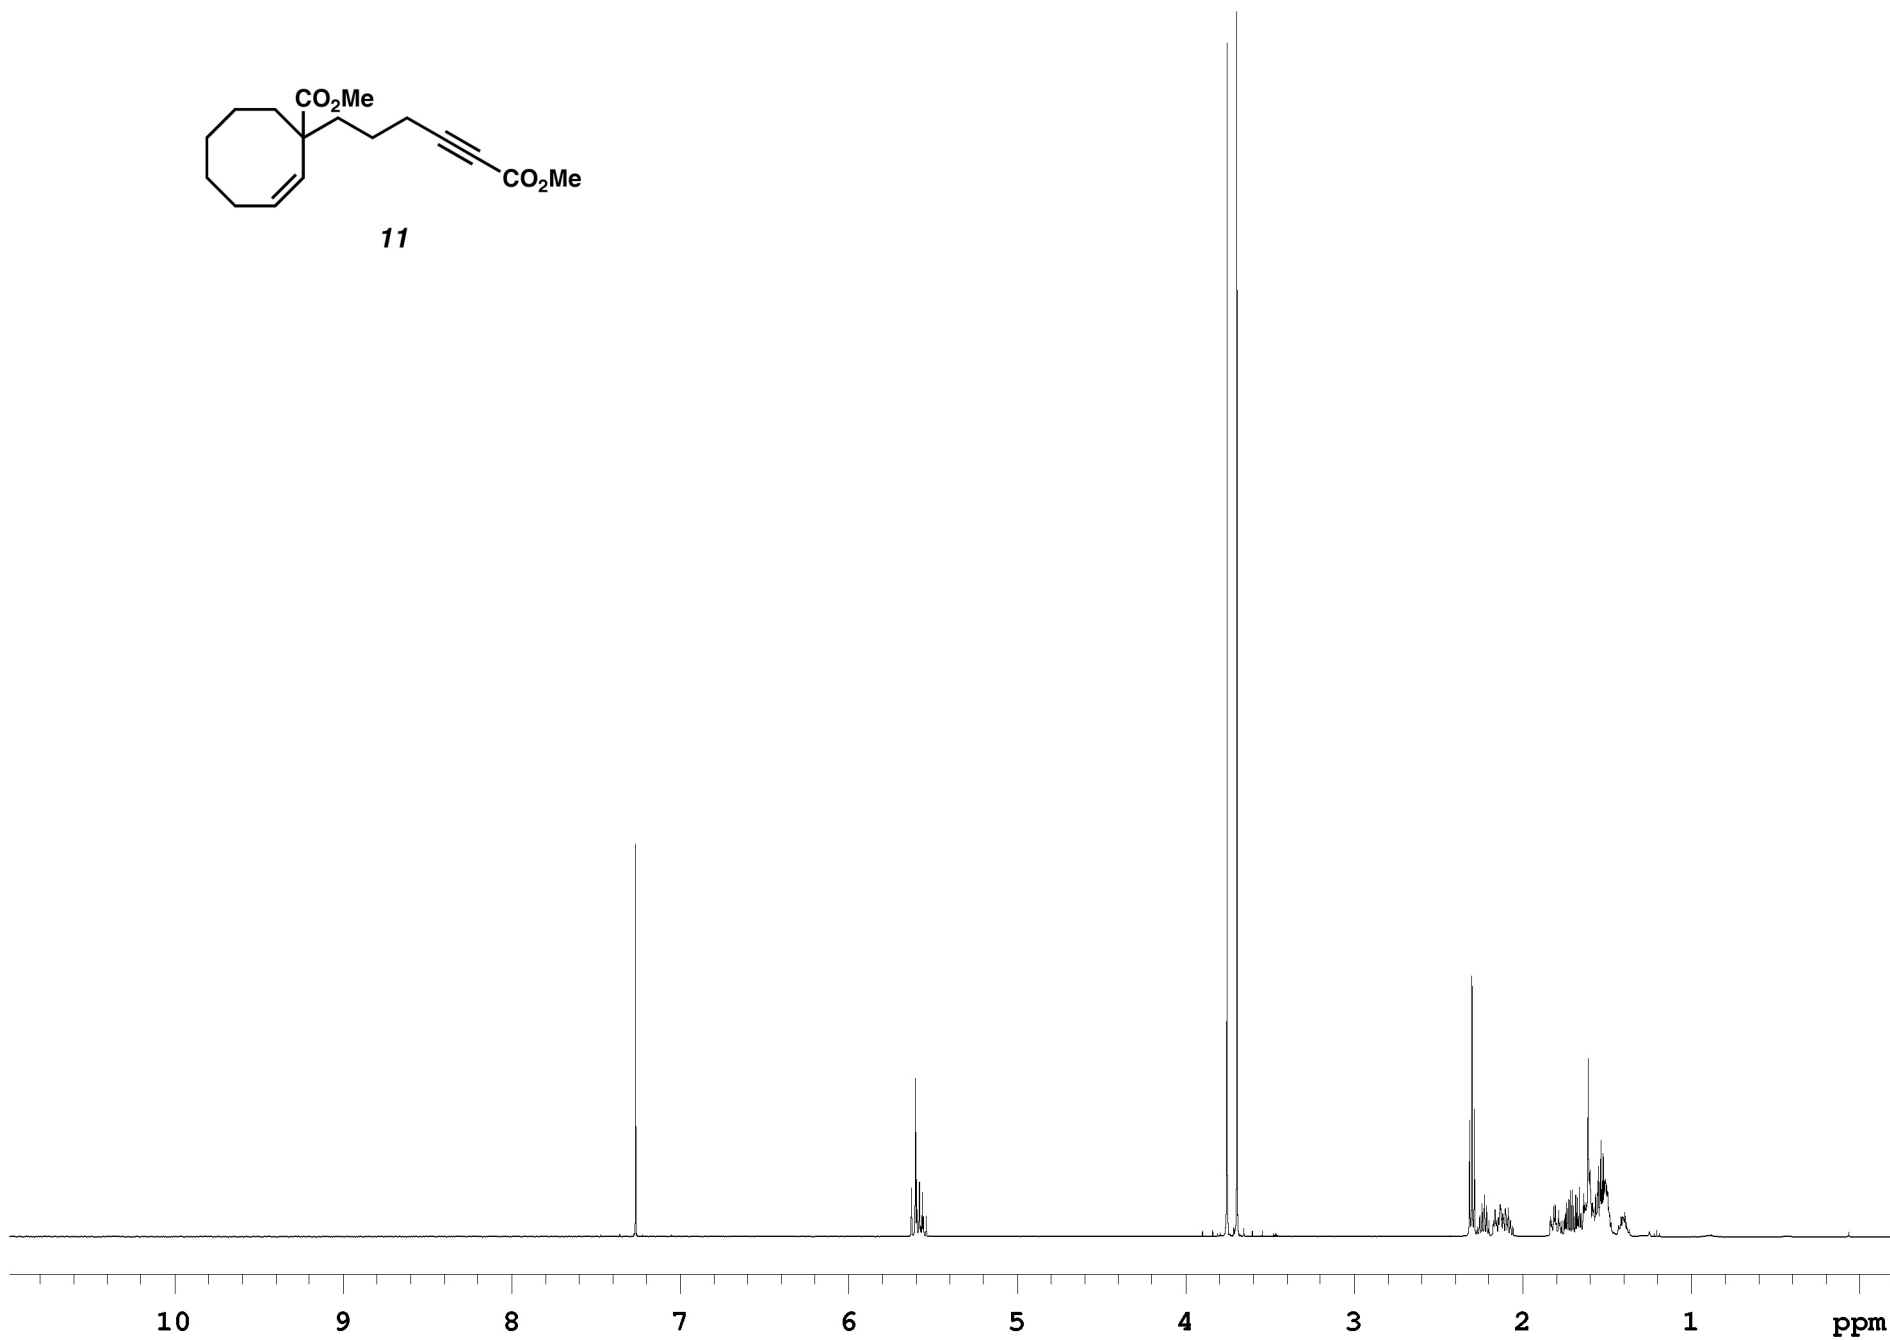

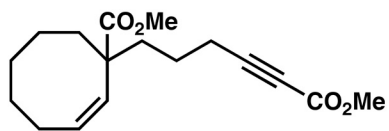

11

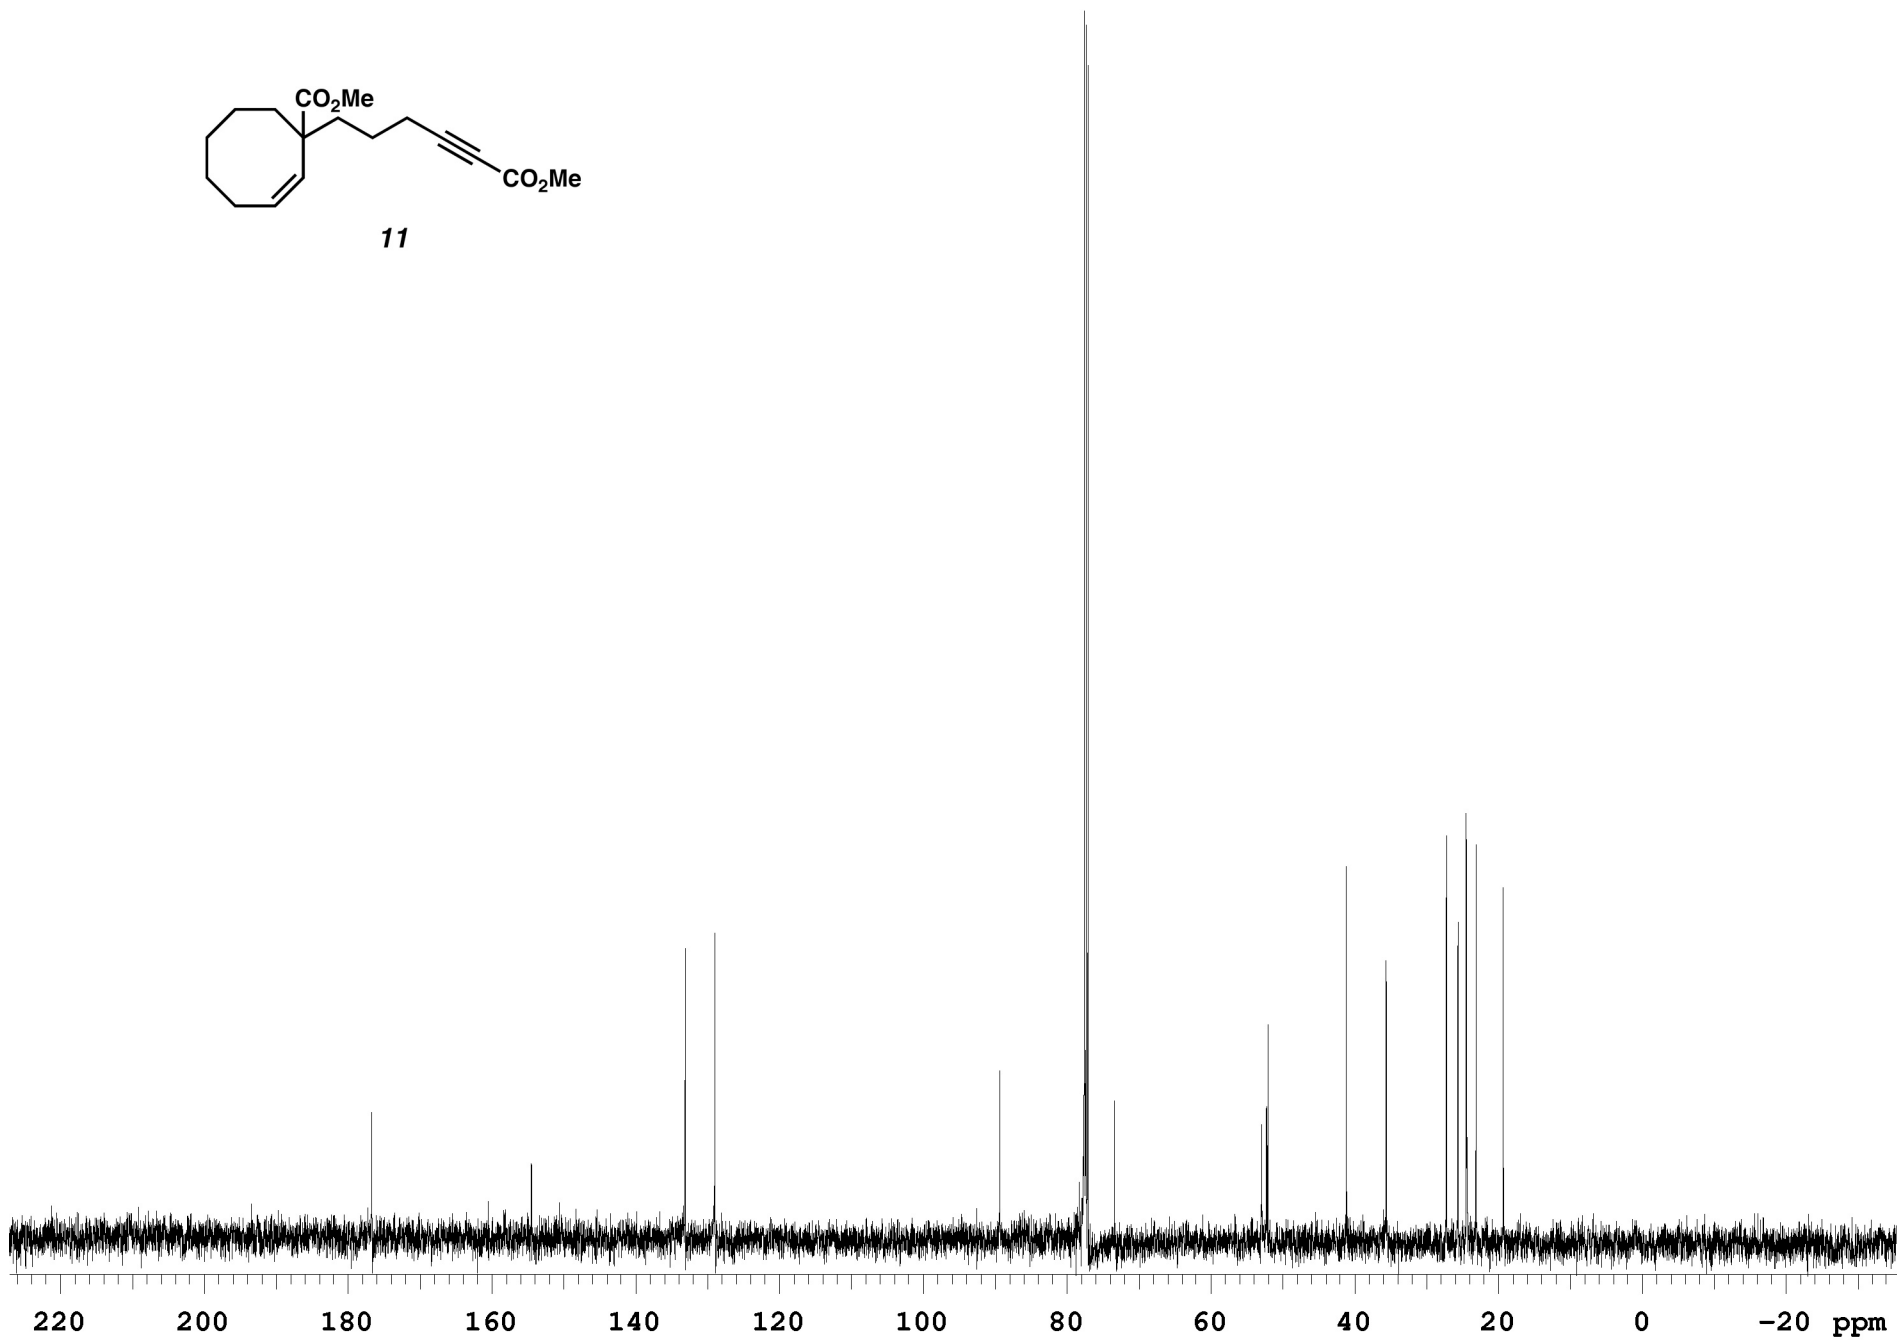

Supplement: NIHMS91150-supplement-2_si_002.pdf [file NIHMS91150-supplement-2_si_002.pdf]
